# Supplementary material for: Neogene Fallout Tuffs from the Yellowstone Hotspot in the Columbia Plateau Region, Oregon, Washington and Idaho, USA
Source: PLoS One. 2012 Oct 12;7(10):e44205. doi: 10.1371/journal.pone.0044205 (PMC3470548; doi:10.1371/journal.pone.0044205)
Supplement: Table S4 — Electron microprobe analyses of individual glass shards (1,343 analyses). (XLSX) [file pone.0044205.s005.xlsx]

## Sheet: Sheet1
Table S4. EPMA analyses of individual glass shards
See Table 1S for key to samples
MP H2O calculated from difference between measured and calculated stoichiometric oxygen
							Wt % element														Wt % oxide
																														less		MP
Ash unit/location	Sample No.	Si	Ti	Al	Fe	Mn	Mg	Ca	Ba	Na	K	F	Cl	O	Total		SiO2	TiO2	Al2O3	Fe2O3	MnO	MgO	CaO	BaO	Na2O	K2O	F	Cl	Sum	O	sum	H2O	Total
Dinner Creek ash
Dinner Creek Tuff, OR	bns01-17	35.38	0.119	6.31	1.46	0.032	0.01	0.387	0.117	2.54	3.84	0.01	0.074	50.12	100.399		75.6849	0.198504	11.9227	2.08736	0.0413184	0.016579	0.54149	0.130631	3.42367	4.62566	0.01	0.074	98.7569	0.020896	98.736	1.8645	100.6
Dinner Creek Tuff, OR	bns01-17	35.55	0.078	6.35	1.48	0.036	0.018	0.397	0.134	2.7	3.76	0	0.073	50.23	100.806		76.0486	0.130112	11.9983	2.11596	0.0464832	0.0298422	0.555482	0.149611	3.63933	4.5293	0	0.073	99.316	0.01646	99.2995	1.68832	100.988
Dinner Creek Tuff, OR	bns01-17	35.65	0.08	6.23	1.48	0.039	0.013	0.402	0.095	2.71	3.29	0.07	0.062	50.8	100.921		76.2625	0.133448	11.7716	2.11596	0.0503568	0.0215527	0.562478	0.106068	3.65281	3.96313	0.07	0.062	98.7719	0.0434534	98.7284	2.46025	101.189
Dinner Creek Tuff, OR	bns01-17	35.5	0.091	6.28	1.49	0.062	0.016	0.394	0.156	2.78	3.33	0.01	0.066	51.3	101.475		75.9416	0.151797	11.8661	2.13025	0.0800544	0.0265264	0.551285	0.174174	3.74716	4.01132	0.01	0.066	98.7562	0.0190921	98.7371	3.07368	101.811
Dinner Creek Tuff, OR	bns01-17	35.57	0.089	6.26	1.5	0.043	0.026	0.395	0.107	2.78	3.31	0	0.076	51.07	101.226		76.0913	0.148461	11.8283	2.14455	0.0555216	0.0431054	0.552684	0.119466	3.74716	3.98723	0	0.076	98.7938	0.0171364	98.7767	2.74911	101.526
Dinner Creek Tuff, OR	bns01-17	35.34	0.084	6.23	1.51	0.046	0.016	0.387	0.129	2.56	3.84	0.06	0.069	50.79	101.061		75.5993	0.14012	11.7716	2.15885	0.0593952	0.0265264	0.54149	0.144029	3.45062	4.62566	0.06	0.069	98.6466	0.0408212	98.6058	2.7557	101.361
Dinner Creek Tuff, OR	bns01-17	35.36	0.061	6.28	1.52	0.042	0.017	0.382	0.158	2.52	3.68	0.05	0.078	50.56	100.708		75.6421	0.101754	11.8661	2.17314	0.0542304	0.0281843	0.534494	0.176407	3.39671	4.43293	0.05	0.078	98.534	0.03864	98.4954	2.48277	100.978
Dinner Creek Tuff, OR	bns01-17	35.92	0.081	6.32	1.53	0.059	0.017	0.375	0.111	2.78	3.24	0.06	0.076	51.18	101.749		76.8401	0.135116	11.9416	2.18744	0.0761808	0.0281843	0.5247	0.123932	3.74716	3.9029	0.06	0.076	99.6433	0.0423996	99.6009	2.41012	102.011
Dinner Creek Tuff, OR	bns01-17	35.53	0.064	6.3	1.53	0.03	0.024	0.37	0.161	2.71	3.26	0.09	0.076	50.7	100.845		76.0058	0.106758	11.9039	2.18744	0.038736	0.0397896	0.517704	0.179757	3.65281	3.927	0.09	0.076	98.7256	0.0550312	98.6706	2.43979	101.11
Dinner Creek Tuff, OR	bns01-17	35.53	0.08	6.33	1.53	0.07	0.018	0.415	0.125	2.68	3.36	0.07	0.08	51.18	101.468		76.0058	0.133448	11.9605	2.18744	0.090384	0.0298422	0.580668	0.139563	3.61237	4.04746	0.07	0.08	98.9375	0.047512	98.89	2.89386	101.784
Dinner Creek Tuff, OR	bns01-17	35.8	0.062	6.31	1.53	0.032	0.018	0.374	0.122	2.68	3.23	0.1	0.069	51.76	102.087		76.5834	0.103422	11.9227	2.18744	0.0413184	0.0298422	0.523301	0.136213	3.61237	3.89086	0.1	0.069	99.1999	0.0576633	99.1422	3.30644	102.449
Dinner Creek Tuff, OR	bns01-17	35.44	0.078	6.25	1.54	0.056	0.01	0.39	0.12	2.55	3.29	0.01	0.083	51.43	101.247		75.8132	0.130112	11.8094	2.20174	0.0723072	0.016579	0.545688	0.13398	3.43715	3.96313	0.01	0.083	98.2163	0.0229253	98.1934	3.42893	101.622
Dinner Creek Tuff, OR	bns01-17	35.6	0.118	6.3	1.54	0.08	0.013	0.404	0.11	2.77	3.37	0	0.078	51.12	101.503		76.1555	0.196836	11.9039	2.20174	0.103296	0.0215527	0.565277	0.122815	3.73368	4.0595	0	0.078	99.1421	0.0175874	99.1245	2.66941	101.794
Dinner Creek Tuff, OR	bns01-17	35.57	0.107	6.36	1.54	0.082	0.015	0.392	0.152	2.73	3.25	0.09	0.084	51.78	102.152		76.0913	0.178487	12.0172	2.20174	0.105878	0.0248685	0.548486	0.169708	3.67977	3.91495	0.09	0.084	99.1064	0.056835	99.0496	3.48376	102.533
Dinner Creek Tuff, OR	bns01-17	35.77	0.067	6.22	1.55	0.041	0.014	0.367	0.129	2.78	3.28	0	0.067	51.4	101.685		76.5192	0.111763	11.7527	2.21604	0.0529392	0.0232106	0.513506	0.144029	3.74716	3.95109	0	0.067	99.0986	0.0151071	99.0835	2.92024	102.004
Dinner Creek Tuff, OR	bns01-17	35.26	0.09	6.31	1.55	0.033	0.017	0.407	0.161	2.45	3.95	0.1	0.071	50.4	100.799		75.4282	0.150129	11.9227	2.21604	0.0426096	0.0281843	0.569474	0.179757	3.30236	4.75817	0.1	0.071	98.7687	0.0581143	98.7105	2.34309	101.054
Dinner Creek Tuff, OR	bns01-17	35.67	0.093	6.33	1.56	0.029	0.001	0.386	0.132	2.7	3.39	0.03	0.084	51.6	102.005		76.3053	0.155133	11.9605	2.23033	0.0374448	0.0016579	0.540091	0.147378	3.63933	4.08359	0.03	0.084	99.2148	0.0315718	99.1832	3.16809	102.351
Dinner Creek Tuff, OR	bns01-17	35.59	0.077	6.2	1.57	0.074	0.016	0.381	0.154	2.62	3.25	0.03	0.077	51.38	101.419		76.1341	0.128444	11.7149	2.24463	0.0955488	0.0265264	0.533095	0.171941	3.5315	3.91495	0.03	0.077	98.6027	0.0299935	98.5727	3.1957	101.768
Dinner Creek Tuff, OR	bns01-17	35.71	0.105	6.27	1.57	0.041	0.013	0.392	0.143	2.86	3.41	0.08	0.072	51.07	101.736		76.3908	0.17515	11.8472	2.24463	0.0529392	0.0215527	0.548486	0.159659	3.85499	4.10769	0.08	0.072	99.5551	0.0499187	99.5052	2.50322	102.008
Dinner Creek Tuff, OR	bns01-17	35.66	0.056	6.29	1.57	0.047	0.01	0.363	0.122	2.71	3.41	0.04	0.062	50.84	101.18		76.2839	0.0934136	11.885	2.24463	0.0606864	0.016579	0.50791	0.136213	3.65281	4.10769	0.04	0.062	99.0908	0.0308218	99.0599	2.37863	101.439
Dinner Creek Tuff, OR	bns01-17	35.37	0.107	6.28	1.59	0.075	0.023	0.381	0.152	2.78	3.26	0.05	0.057	51.08	101.205		75.6635	0.178487	11.8661	2.27322	0.09684	0.0381317	0.533095	0.169708	3.74716	3.927	0.05	0.057	98.6002	0.0339049	98.5663	2.96214	101.528
Dinner Creek Tuff, OR	bns01-17	35.4	0.074	6.18	1.59	0.049	0.016	0.392	0.115	2.67	3.55	0.09	0.08	50.76	100.966		75.7277	0.123439	11.6771	2.27322	0.0632688	0.0265264	0.548486	0.128397	3.59889	4.27633	0.09	0.08	98.6134	0.0559331	98.5574	2.70325	101.261
Dinner Creek Tuff, OR	bns01-17	35.71	0.08	6.31	1.6	0.041	0.036	0.4	0.116	2.73	3.34	0.07	0.069	50.99	101.492		76.3908	0.133448	11.9227	2.28752	0.0529392	0.0596844	0.55968	0.129514	3.67977	4.02336	0.07	0.069	99.3785	0.0450317	99.3335	2.4219	101.755
Palina Basin, OR	mas96-02	34.34	0.071	6.18	1.38	0.062	0.009	0.331	0.11	2	4.87	0.15	0.05	50.12	99.673		73.4601	0.118435	11.6771	1.97299	0.0800544	0.0149211	0.463135	0.122815	2.6958	5.8664	0.15	0.05	96.6718	0.0744319	96.5974	3.45378	100.051
Palina Basin, OR	mas96-02	34.66	0.091	6.2	1.41	0.051	0.008	0.452	0.123	2.91	3.55	0.149	0.076	50.29	99.97		74.1447	0.151797	11.7149	2.01588	0.0658512	0.0132632	0.632438	0.137329	3.92239	4.27633	0.149	0.076	97.2998	0.0798733	97.22	3.0875	100.307
Palina Basin, OR	mas96-02	34.53	0.106	6.25	1.43	0.034	0.013	0.362	0.172	2.78	3.69	0.155	0.053	50.04	99.615		73.8666	0.176819	11.8094	2.04447	0.0439008	0.0215527	0.50651	0.192038	3.74716	4.44497	0.155	0.053	97.0614	0.0772136	96.9842	2.9534	99.9376
Palina Basin, OR	mas96-02	34.57	0.071	6.27	1.45	0.08	0.016	0.39	0.103	3	3.31	0.161	0.076	50.11	99.607		73.9521	0.118435	11.8472	2.07306	0.103296	0.0265264	0.545688	0.115	4.0437	3.98723	0.161	0.076	97.0492	0.0849259	96.9643	2.96677	99.9311
Palina Basin, OR	mas96-02	34.73	0.051	6.31	1.46	0.072	0.025	0.388	0.153	2.89	3.42	0.173	0.072	50.66	100.404		74.2944	0.0850731	11.9227	2.08736	0.0929664	0.0414475	0.54289	0.170824	3.89543	4.11973	0.173	0.072	97.4979	0.0890766	97.4088	3.36329	100.772
Palina Basin, OR	mas96-02	34.64	0.081	6.27	1.48	0.054	0.011	0.365	0.143	2.72	3.79	0.117	0.057	50.12	99.848		74.1019	0.135116	11.8472	2.11596	0.0697248	0.0182369	0.510708	0.159659	3.66629	4.56543	0.117	0.057	97.3642	0.0621155	97.3021	2.85787	100.16
Palina Basin, OR	mas96-02	34.57	0.097	6.31	1.49	0.036	0.017	0.361	0.147	3.06	3.31	0.167	0.064	50.05	99.679		73.9521	0.161806	11.9227	2.13025	0.0464832	0.0281843	0.505111	0.164126	4.12457	3.98723	0.167	0.064	97.2537	0.0847465	97.1689	2.81759	99.9865
Palina Basin, OR	mas96-02	34.38	0.099	6.22	1.49	0.051	0.013	0.359	0.109	2.27	4.53	0.169	0.054	50.05	99.794		73.5457	0.165142	11.7527	2.13025	0.0658512	0.0215527	0.502313	0.121699	3.05973	5.45684	0.169	0.054	97.0448	0.0833338	96.9614	3.18033	100.142
Palina Basin, OR	mas96-02	34.67	0.109	6.25	1.5	0.045	0.018	0.364	0.138	2.73	3.58	0.172	0.058	49.73	99.364		74.1661	0.181823	11.8094	2.14455	0.058104	0.0298422	0.509309	0.154077	3.67977	4.31247	0.172	0.058	97.2754	0.0854988	97.1899	2.43959	99.6295
Palina Basin, OR	mas96-02	34.43	0.106	6.3	1.5	0.081	0.011	0.376	0.12	2.59	3.92	0.139	0.071	49.77	99.414		73.6527	0.176819	11.9039	2.14455	0.104587	0.0182369	0.526099	0.13398	3.49106	4.72203	0.139	0.071	97.0839	0.0745353	97.0093	2.69897	99.7083
Palina Basin, OR	mas96-02	34.66	0.078	6.21	1.5	0.018	0.007	0.369	0.117	2.93	3.26	0.149	0.085	50.33	99.713		74.1447	0.130112	11.7338	2.14455	0.0232416	0.0116053	0.516305	0.130631	3.94935	3.927	0.149	0.085	96.9453	0.0819026	96.8634	3.19959	100.063
Palina Basin, OR	mas96-02	34.42	0.093	6.21	1.51	0.036	0.013	0.376	0.169	2.56	3.87	0.234	0.068	49.73	99.289		73.6313	0.155133	11.7338	2.15885	0.0464832	0.0215527	0.526099	0.188689	3.45062	4.6618	0.234	0.068	96.8763	0.113859	96.7624	2.8361	99.5985
Palina Basin, OR	mas96-02	34.71	0.073	6.18	1.51	0.066	0.005	0.352	0.183	2.62	4.03	0.155	0.056	49.95	99.89		74.2516	0.121771	11.6771	2.15885	0.0852192	0.0082895	0.492518	0.20432	3.5315	4.85454	0.155	0.056	97.5967	0.07789	97.5189	2.6612	100.18
Palina Basin, OR	mas96-02	34.8	0.093	6.19	1.51	0.063	0.023	0.392	0.164	3.13	3.19	0.181	0.076	50.59	100.402		74.4442	0.155133	11.696	2.15885	0.0813456	0.0381317	0.548486	0.183106	4.21893	3.84267	0.181	0.076	97.6238	0.0933469	97.5305	3.22418	100.755
Palina Basin, OR	mas96-02	34.56	0.11	6.28	1.52	0.037	0.01	0.375	0.157	2.75	3.69	0.247	0.085	49.97	99.791		73.9308	0.183491	11.8661	2.17314	0.0477744	0.016579	0.5247	0.175291	3.70673	4.44497	0.247	0.085	97.4015	0.123166	97.2783	2.82046	100.099
Palina Basin, OR	mas96-02	34.47	0.1	6.27	1.52	0.045	0.015	0.365	0.138	2.86	3.61	0.174	0.075	50.04	99.682		73.7382	0.16681	11.8472	2.17314	0.058104	0.0248685	0.510708	0.154077	3.85499	4.34861	0.174	0.075	97.1257	0.0901741	97.0355	2.97101	100.007
Palina Basin, OR	mas96-02	34.71	0.065	6.23	1.53	0.051	0.006	0.365	0.102	2.87	3.58	0.173	0.084	50.56	100.326		74.2516	0.108426	11.7716	2.18744	0.0658512	0.0099474	0.510708	0.113883	3.86847	4.31247	0.173	0.084	97.4574	0.0917824	97.3656	3.32412	100.69
Palina Basin, OR	mas96-02	34.75	0.071	6.21	1.54	0.092	0.017	0.387	0.175	3	3.16	0.173	0.079	50.84	100.494		74.3372	0.118435	11.7338	2.20174	0.11879	0.0281843	0.54149	0.195387	4.0437	3.80654	0.173	0.079	97.3773	0.090655	97.2866	3.60203	100.889
Palina Basin, OR	mas96-02	34.53	0.071	6.23	1.54	0.038	0.011	0.362	0.14	3.12	3.18	0.16	0.057	51.23	100.669		73.8666	0.118435	11.7716	2.20174	0.0490656	0.0182369	0.50651	0.15631	4.20545	3.83063	0.16	0.057	96.9415	0.0802207	96.8613	4.2774	101.139
Palina Basin, OR	mas96-02	34.99	0.081	6.22	1.55	0.034	0.007	0.401	0.148	3.14	3.11	0.136	0.073	50.73	100.62		74.8506	0.135116	11.7527	2.21604	0.0439008	0.0116053	0.561079	0.165242	4.23241	3.74631	0.136	0.073	97.924	0.0737231	97.8503	3.10964	100.96
Palina Basin, OR	mas96-02	34.75	0.08	6.3	1.6	0.067	0.014	0.361	0.135	2.82	3.36	0.125	0.075	50.57	100.257		74.3372	0.133448	11.9039	2.28752	0.0865104	0.0232106	0.505111	0.150728	3.80108	4.04746	0.125	0.075	97.4761	0.0695425	97.4066	3.20043	100.607
Buffalo Canyon, NV	buf94-623	34.216	0.065	5.872	1.547	0.072	0.021	0.318	0.129	1.912	4.996	0.111	0.088	50.752	100.099		73.1949	0.108426	11.0951	2.21175	0.0929664	0.0348159	0.444946	0.144029	2.57718	6.01818	0.111	0.088	96.1213	0.066579	96.0547	4.54351	100.598
Buffalo Canyon, NV	buf94-623	34.198	0.075	5.894	1.493	0.069	0.027	0.333	0.133	1.073	5.062	0.198	0.081	51.131	99.767		73.1564	0.125107	11.1367	2.13454	0.0890928	0.0447633	0.465934	0.148495	1.4463	6.09769	0.198	0.081	95.124	0.101632	95.0224	5.33141	100.354
Buffalo Canyon, NV	buf94-623	34.449	0.09	5.899	1.635	0.03	0.033	0.354	0.111	1.409	5.508	0.182	0.071	50.094	99.865		73.6933	0.150129	11.1462	2.33756	0.038736	0.0547107	0.495317	0.123932	1.89919	6.63494	0.182	0.071	96.827	0.0926406	96.7343	3.51562	100.25
Buffalo Canyon, NV	buf94-623	34.382	0.061	5.904	1.513	0.054	0.018	0.314	0.079	1.931	4.69	0.135	0.076	50.442	99.599		73.55	0.101754	11.1556	2.16314	0.0697248	0.0298422	0.439349	0.0882035	2.60279	5.64957	0.135	0.076	96.061	0.0739785	95.987	4.05723	100.044
Buffalo Canyon, NV	buf94-623	34.384	0.1	5.94	1.54	0.071	0.017	0.353	0.137	2.021	4.631	0.156	0.067	50.735	100.152		73.5543	0.16681	11.2236	2.20174	0.0916752	0.0281843	0.493918	0.152961	2.72411	5.5785	0.156	0.067	96.4388	0.0807913	96.358	4.26196	100.62
Buffalo Canyon, NV	buf94-623	34.241	0.057	5.948	1.483	0.051	0.015	0.334	0.135	1.921	4.895	0.176	0.056	50.845	100.157		73.2483	0.0950817	11.2387	2.12025	0.0658512	0.0248685	0.467333	0.150728	2.58932	5.89652	0.176	0.056	96.129	0.0867321	96.0423	4.62274	100.665
Buffalo Canyon, NV	buf94-623	34.387	0.058	5.955	1.554	0.08	0.014	0.337	0.135	2.048	4.937	0.181	0.064	51.146	100.896		73.5607	0.0967498	11.252	2.22175	0.103296	0.0232106	0.47153	0.150728	2.7605	5.94711	0.181	0.064	96.8325	0.0906412	96.7419	4.66706	101.409
Buffalo Canyon, NV	buf94-623	34.635	0.068	5.96	1.493	0.061	0.016	0.332	0.118	2.167	4.462	0.192	0.057	51.004	100.565		74.0912	0.113431	11.2614	2.13454	0.0787632	0.0265264	0.464534	0.131747	2.9209	5.37493	0.192	0.057	96.847	0.0936944	96.7533	4.28185	101.035
Buffalo Canyon, NV	buf94-623	34.314	0.068	5.969	1.554	0.051	0.013	0.346	0.126	2.265	3.823	0.243	0.082	49.603	98.457		73.4045	0.113431	11.2784	2.22175	0.0658512	0.0215527	0.484123	0.140679	3.05299	4.60519	0.243	0.082	95.7135	0.120805	95.5927	3.2161	98.8088
Buffalo Canyon, NV	buf94-623	34.352	0.078	5.983	1.525	0.044	0.014	0.338	0.147	1.688	5.366	0.158	0.075	50.28	100.048		73.4858	0.130112	11.3049	2.18029	0.0568128	0.0232106	0.47293	0.164126	2.27526	6.46388	0.158	0.075	96.7903	0.0834373	96.7069	3.75242	100.459
Buffalo Canyon, NV	buf94-623	34.594	0.098	5.983	1.485	0.049	0.025	0.362	0.155	1.99	4.825	0.144	0.061	50.848	100.619		74.0035	0.163474	11.3049	2.1231	0.0632688	0.0414475	0.50651	0.173058	2.68232	5.8122	0.144	0.061	97.0787	0.0743858	97.0044	4.06011	101.064
Buffalo Canyon, NV	buf94-623	34.367	0.064	5.991	1.509	0.051	0.02	0.342	0.109	2.095	4.648	0.173	0.054	50.644	100.067		73.5179	0.106758	11.32	2.15742	0.0658512	0.033158	0.478526	0.121699	2.82385	5.59898	0.173	0.054	96.4511	0.085018	96.3661	4.15721	100.523
Buffalo Canyon, NV	buf94-623	34.519	0.079	5.996	1.491	0.065	0.015	0.336	0.154	2.002	4.727	0.227	0.081	50.926	100.618		73.843	0.13178	11.3294	2.13168	0.083928	0.0248685	0.470131	0.171941	2.6985	5.69414	0.227	0.081	96.8875	0.113843	96.7736	4.31859	101.092
Buffalo Canyon, NV	buf94-623	34.475	0.055	5.996	1.542	0.057	0.017	0.333	0.08	2.114	4.695	0.176	0.052	51.249	100.841		73.7489	0.0917455	11.3294	2.2046	0.0735984	0.0281843	0.465934	0.08932	2.84946	5.6556	0.176	0.052	96.7648	0.0858302	96.679	4.67597	101.355
Buffalo Canyon, NV	buf94-623	34.81	0.075	6.001	1.522	0.025	0.008	0.353	0.083	2.559	3.655	0.172	0.063	51.087	100.413		74.4656	0.125107	11.3389	2.176	0.03228	0.0132632	0.493918	0.0926695	3.44928	4.40281	0.172	0.063	96.8248	0.0866262	96.7381	4.12792	100.866
Buffalo Canyon, NV	buf94-623	34.727	0.101	6.017	1.512	0.047	0	0.328	0.139	2.6	3.908	0.134	0.072	50.602	100.187		74.288	0.168478	11.3691	2.16171	0.0606864	0	0.458938	0.155194	3.50454	4.70758	0.134	0.072	97.0802	0.0726556	97.0076	3.57053	100.578
Buffalo Canyon, NV	buf94-623	34.359	0.086	6.017	1.541	0.007	0.001	0.35	0.122	2.087	4.774	0.175	0.052	51.503	101.074		73.5008	0.143457	11.3691	2.20317	0.0090384	0.0016579	0.48972	0.136213	2.81307	5.75076	0.175	0.052	96.644	0.0854091	96.5586	5.07355	101.632
Buffalo Canyon, NV	buf94-623	34.689	0.075	6.029	1.528	0.056	0.009	0.333	0.108	2.487	4.098	0.184	0.082	50.988	100.666		74.2067	0.125107	11.3918	2.18458	0.0723072	0.0149211	0.465934	0.120582	3.35223	4.93645	0.184	0.082	97.1366	0.095963	97.0407	4.0722	101.113
Buffalo Canyon, NV	buf94-623	34.557	0.055	6.03	1.52	0.046	0.014	0.335	0.13	2.081	4.565	0.155	0.069	51.134	100.691		73.9243	0.0917455	11.3937	2.17314	0.0593952	0.0232106	0.468732	0.145145	2.80498	5.499	0.155	0.069	96.8074	0.0808212	96.7265	4.45367	101.18
Buffalo Canyon, NV	buf94-623	34.59	0.082	6.036	1.571	0.029	0.017	0.335	0.166	2.409	4.022	0.191	0.06	50.993	100.501		73.9949	0.136784	11.405	2.24606	0.0374448	0.0281843	0.468732	0.185339	3.24709	4.8449	0.191	0.06	96.8455	0.0939498	96.7515	4.21183	100.963
Buffalo Canyon, NV	buf94-623	34.376	0.091	6.039	1.543	0.057	0.015	0.353	0.071	2	4.765	0.185	0.059	50.924	100.478		73.5371	0.151797	11.4107	2.20603	0.0735984	0.0248685	0.493918	0.0792715	2.6958	5.73992	0.185	0.059	96.657	0.091198	96.5658	4.39489	100.961
Buffalo Canyon, NV	buf94-623	34.69	0.066	6.05	1.513	0.056	0.017	0.331	0.152	2.77	3.465	0.208	0.06	51.28	100.658		74.2088	0.110095	11.4315	2.16314	0.0723072	0.0281843	0.463135	0.169708	3.73368	4.17394	0.208	0.06	96.8225	0.101108	96.7214	4.42239	101.144
Buffalo Canyon, NV	buf94-623	34.57	0.069	6.08	1.556	0.051	0.008	0.354	0.123	2.348	3.922	0.209	0.074	51.436	100.8		73.9521	0.115099	11.4882	2.22461	0.0658512	0.0132632	0.495317	0.137329	3.16487	4.72444	0.209	0.074	96.6641	0.104685	96.5594	4.76438	101.324
Buffalo Canyon, NV	buf94-623	34.739	0.064	6.089	1.506	0.047	0.009	0.35	0.108	2.532	4.265	0.143	0.048	50.249	100.149		74.3137	0.106758	11.5052	2.15313	0.0606864	0.0149211	0.48972	0.120582	3.41288	5.13762	0.143	0.048	97.5061	0.0710335	97.4351	3.0468	100.482
Carlin, NV	crln04-1290	34	0.075	6.01	1.44	0.038	0.014	0.375	0.149	1.61	4.9		0.073	46.28	94.964		72.7328	0.125107	11.3559	2.05877	0.0490656	0.0232106	0.5247	0.166358	2.17012	5.90254	0	0.073	95.1816	0.01646	95.1651	-0.232515	94.9326
Carlin, NV	crln04-1290	33.91	0.064	5.94	1.49	0.053	0.013	0.347	0.112	1.86	5.1		0.068	46.23	95.187		72.5403	0.106758	11.2236	2.13025	0.0684336	0.0215527	0.485522	0.125048	2.50709	6.14346	0	0.068	95.42	0.0153326	95.4047	-0.251159	95.1535
Carlin, NV	crln04-1290	34.05	0.075	6.02	1.49	0.067	0.017	0.349	0.141	2.03	4.61		0.068	46.45	95.367		72.8398	0.125107	11.3748	2.13025	0.0865104	0.0281843	0.488321	0.157426	2.73624	5.55321	0	0.068	95.5878	0.0153326	95.5725	-0.237404	95.3351
Carlin, NV	crln04-1290	34.18	0.064	5.98	1.5	0.06	0.017	0.376	0.108	1.83	4.67		0.068	46.5	95.353		73.1179	0.106758	11.2992	2.14455	0.077472	0.0281843	0.526099	0.120582	2.46666	5.62548	0	0.068	95.5809	0.0153326	95.5655	-0.245354	95.3202
Carlin, NV	crln04-1290	34.11	0.062	6.01	1.5	0.039	0.021	0.341	0.108	2.42	4.16		0.079	46.52	95.37		72.9681	0.103422	11.3559	2.14455	0.0503568	0.0348159	0.477127	0.120582	3.26192	5.01114	0	0.079	95.6069	0.0178129	95.5891	-0.252715	95.3364
Carlin, NV	crln04-1290	34.1	0.109	5.99	1.5	0.046	0.013	0.376	0.116	2.23	4.02		0.065	46.45	95.015		72.9467	0.181823	11.3181	2.14455	0.0593952	0.0215527	0.526099	0.129514	3.00582	4.84249	0	0.065	95.2411	0.0146561	95.2264	-0.244051	94.9824
Carlin, NV	crln04-1290	34.26	0.061	5.98	1.5	0.067	0.019	0.366	0.119	2.28	3.99		0.081	46.61	95.333		73.289	0.101754	11.2992	2.14455	0.0865104	0.0315001	0.512107	0.132863	3.07321	4.80635	0	0.081	95.5581	0.0182638	95.5398	-0.238875	95.3009
Carlin, NV	crln04-1290	34.5	0.097	6	1.51	0.036	0.022	0.357	0.112	2.42	3.53		0.06	46.87	95.514		73.8024	0.161806	11.337	2.15885	0.0464832	0.0364738	0.499514	0.125048	3.26192	4.25224	0	0.06	95.7417	0.0135287	95.7282	-0.247216	95.481
Carlin, NV	crln04-1290	34.57	0.043	6.02	1.51	0.044	0.016	0.38	0.138	2.71	3.26		0.072	46.99	95.753		73.9521	0.0717283	11.3748	2.15885	0.0568128	0.0265264	0.531696	0.154077	3.65281	3.927	0	0.072	95.9784	0.0162345	95.9622	-0.241583	95.7206
Carlin, NV	crln04-1290	34.08	0.074	6	1.52	0.044	0.026	0.344	0.131	2.22	4.03		0.08	46.41	94.959		72.9039	0.123439	11.337	2.17314	0.0568128	0.0431054	0.481325	0.146262	2.99234	4.85454	0	0.08	95.1919	0.0180383	95.1739	-0.24794	94.9259
Carlin, NV	crln04-1290	34.17	0.078	6.09	1.53	0.039	0.014	0.364	0.092	2.13	4.38		0.06	46.64	95.587		73.0965	0.130112	11.5071	2.18744	0.0503568	0.0232106	0.509309	0.102718	2.87103	5.27615	0	0.06	95.8138	0.0135287	95.8003	-0.24623	95.5541
Carlin, NV	crln04-1290	34.34	0.059	5.97	1.53	0.046	0.016	0.377	0.14	2.46	3.65		0.075	46.69	95.353		73.4601	0.0984179	11.2803	2.18744	0.0593952	0.0265264	0.527498	0.15631	3.31583	4.39679	0	0.075	95.5837	0.0169109	95.5667	-0.246696	95.32
Carlin, NV	crln04-1290	34.47	0.085	6.11	1.53	0.06	0.014	0.341	0.082	2.31	3.59		0.068	46.9	95.56		73.7382	0.141789	11.5448	2.18744	0.077472	0.0232106	0.477127	0.091553	3.11365	4.32451	0	0.068	95.7878	0.0153326	95.7725	-0.245295	95.5272
Carlin, NV	crln04-1290	34.47	0.096	6.03	1.53	0.045	0.027	0.36	0.085	2.25	3.63		0.079	46.82	95.422		73.7382	0.160138	11.3937	2.18744	0.058104	0.0447633	0.503712	0.0949025	3.03277	4.3727	0	0.079	95.6654	0.0178129	95.6476	-0.260075	95.3876
Carlin, NV	crln04-1290	34.3	0.09	5.95	1.54	0.055	0.002	0.361	0.146	1.94	4.26		0.071	46.58	95.295		73.3746	0.150129	11.2425	2.20174	0.071016	0.0033158	0.505111	0.163009	2.61493	5.1316	0	0.071	95.5289	0.016009	95.5129	-0.251428	95.2615
Carlin, NV	crln04-1290	33.85	0.074	5.9	1.54	0.052	0.021	0.359	0.122	1.88	4.62		0.079	46.06	94.557		72.4119	0.123439	11.148	2.20174	0.0671424	0.0348159	0.502313	0.136213	2.53405	5.56525	0	0.079	94.8039	0.0178129	94.7861	-0.263981	94.5221
Carlin, NV	crln04-1290	34.75	0.058	6.08	1.54	0.061	0	0.371	0.123	2.46	3.32		0.087	47.17	96.02		74.3372	0.0967498	11.4882	2.20174	0.0787632	0	0.519103	0.137329	3.31583	3.99927	0	0.087	96.2611	0.0196167	96.2415	-0.2555	95.986
Carlin, NV	crln04-1290	33.86	0.042	5.99	1.55	0.031	0.011	0.345	0.139	1.75	4.7		0.06	46.11	94.588		72.4333	0.0700602	11.3181	2.21604	0.0400272	0.0182369	0.482724	0.155194	2.35883	5.66162	0	0.06	94.8141	0.0135287	94.8006	-0.245427	94.5552
Carlin, NV	crln04-1290	34	0.09	5.89	1.55	0.039	0.025	0.347	0.133	1.79	5.12		0.055	46.32	95.359		72.7328	0.150129	11.1292	2.21604	0.0503568	0.0414475	0.485522	0.148495	2.41274	6.16755	0	0.055	95.5892	0.0124014	95.5768	-0.251341	95.3255
Carlin, NV	crln04-1290	34.28	0.064	6.05	1.57	0.021	0.006	0.351	0.107	1.83	3.48		0.062	46.42	94.241		73.3318	0.106758	11.4315	2.24463	0.0271152	0.0099474	0.491119	0.119466	2.46666	4.19201	0	0.062	94.483	0.0139797	94.469	-0.262683	94.2063
Virgin Valley 8 ash
Bully Creek Fm, OR	har94-15	33.656	0.12	5.844	1.744	0.059	0.002	0.437	0.069	0.875	5.508	0.291	0.028	50.608	99.241		71.9969	0.200172	11.0422	2.4934	0.0761808	0.0033158	0.61145	0.0770385	1.17941	6.63494	0.291	0.028	94.6341	0.12884	94.5052	5.32151	99.8267
Bully Creek Fm, OR	har94-15	33.952	0.113	5.916	1.714	0.042	0.013	0.419	0.055	0.836	5.441	0.238	0.019	50.918	99.676		72.6301	0.188495	11.1783	2.45051	0.0542304	0.0215527	0.586265	0.0614075	1.12684	6.55423	0.238	0.019	95.1089	0.104495	95.0044	5.24922	100.254
Bully Creek Fm, OR	har94-15	33.639	0.133	6.044	2.09	0.05	0.008	0.52	0.031	1.448	5.437	0.166	0.017	50.383	99.966		71.9605	0.221857	11.4201	2.98807	0.06456	0.0132632	0.727584	0.0346115	1.95176	6.54941	0.166	0.017	96.1148	0.0737279	96.0411	4.40927	100.45
Bully Creek Fm, OR	har94-15	33.928	0.077	5.838	1.632	0.053	0.008	0.399	0.006	0.844	5.536	0.224	0.032	50.597	99.174		72.5788	0.128444	11.0309	2.33327	0.0684336	0.0132632	0.558281	0.006699	1.13763	6.66867	0.224	0.032	94.7804	0.101531	94.6788	5.0508	99.7296
Bully Creek Fm, OR	har94-15	33.969	0.131	5.878	1.759	0.066	0.031	0.44	0	1.186	5.877	0.199	0.017	49.971	99.524		72.6665	0.218521	11.1065	2.51484	0.0852192	0.0513949	0.615648	0	1.59861	7.07943	0.199	0.017	96.1526	0.0876226	96.065	3.88506	99.9501
Bully Creek Fm, OR	har94-15	33.366	0.122	5.973	1.856	0.057	0.015	0.496	0.054	1.101	5.798	0.198	0.028	51.012	100.076		71.3765	0.203508	11.286	2.65352	0.0735984	0.0248685	0.694003	0.060291	1.48404	6.98427	0.198	0.028	95.0666	0.0896818	94.977	5.7302	100.707
Bully Creek Fm, OR	har94-15	34.323	0.154	5.989	1.771	0.045	0.004	0.451	0.034	0.671	5.052	0.193	0.035	51.873	100.595		73.4238	0.256887	11.3162	2.532	0.058104	0.0066316	0.631039	0.037961	0.904441	6.08564	0.193	0.035	95.4807	0.0891549	95.3915	5.84759	101.239
Bully Creek Fm, OR	har94-15	33.702	0.158	5.836	1.716	0.032	0.005	0.434	0.031	1.046	5.916	0.223	0.037	50.605	99.741		72.0953	0.26356	11.0271	2.45337	0.0413184	0.0082895	0.607253	0.0346115	1.4099	7.12641	0.223	0.037	95.3272	0.102237	95.2249	5.07433	100.299
Bully Creek Fm, OR	har94-15	33.712	0.131	5.961	1.84	0.043	0.002	0.492	0.085	0.669	5.355	0.165	0.044	51.172	99.671		72.1167	0.218521	11.2633	2.63065	0.0555216	0.0033158	0.688406	0.0949025	0.901745	6.45063	0.165	0.044	94.6327	0.0793948	94.5533	5.75112	100.304
Bully Creek Fm, OR	har94-15	33.249	0.179	5.956	2.091	0.034	0.005	0.531	0.032	1.373	5.479	0.177	0.018	49.999	99.123		71.1263	0.29859	11.2539	2.9895	0.0439008	0.0082895	0.742975	0.035728	1.85067	6.6	0.177	0.018	95.1448	0.0785849	95.0662	4.55771	99.6239
Bully Creek Fm, OR	har94-15	33.618	0.124	5.811	1.739	0.049	0.006	0.42	0	1.289	5.851	0.18	0.03	50.36	99.477		71.9156	0.206844	10.9799	2.48625	0.0632688	0.0099474	0.587664	0	1.73744	7.04811	0.18	0.03	95.245	0.0825538	95.1625	4.84759	100.01
Bully Creek Fm, OR	har94-15	33.901	0.154	5.853	1.684	0.042	0.013	0.478	0.036	0.606	5.071	0.122	0.033	51.592	99.585		72.521	0.256887	11.0592	2.40761	0.0542304	0.0215527	0.668818	0.040194	0.816827	6.10853	0.122	0.033	94.1099	0.0588092	94.0511	6.21939	100.27
Bully Creek Fm, OR	har94-15	33.681	0.074	5.925	1.802	0.046	0.018	0.495	0.004	0.692	5.285	0.213	0.052	50.639	98.926		72.0504	0.123439	11.1953	2.57632	0.0593952	0.0298422	0.692604	0.004466	0.932747	6.36631	0.213	0.052	94.2958	0.101409	94.1944	5.31682	99.5112
Bully Creek Fm, OR	har94-15	33.674	0.099	5.794	1.695	0.056	0.005	0.434	0.041	0.907	5.673	0.262	0.025	50.561	99.226		72.0354	0.165142	10.9478	2.42334	0.0723072	0.0082895	0.607253	0.0457765	1.22255	6.8337	0.262	0.025	94.6485	0.115953	94.5326	5.27385	99.8064
Bully Creek Fm, OR	har94-15	33.318	0.145	5.871	1.891	0.056	0.016	0.478	0.049	0.911	5.767	0.285	0.036	50.638	99.461		71.2739	0.241874	11.0933	2.70356	0.0723072	0.0265264	0.668818	0.0547085	1.22794	6.94693	0.285	0.036	94.6308	0.128117	94.5027	5.57191	100.075
Bully Creek Fm, OR	har94-15	33.278	0.14	5.855	1.886	0.019	0.012	0.474	0.048	1.395	5.917	0.237	0.044	49.991	99.296		71.1883	0.233534	11.063	2.69641	0.0245328	0.0198948	0.663221	0.053592	1.88032	7.12762	0.237	0.044	95.2314	0.109711	95.1217	4.68983	99.8116
Bully Creek Fm, OR	har94-15	32.845	0.174	6.013	2.308	0.049	0.019	0.624	0.099	1.723	5.431	0.206	0.027	49.76	99.278		70.262	0.290249	11.3616	3.29975	0.0632688	0.0315001	0.873101	0.110534	2.32243	6.54218	0.206	0.027	95.3896	0.0928248	95.2968	4.4727	99.7695
Bully Creek Fm, OR	har94-15	33.41	0.11	5.766	1.73	0.041	0.001	0.448	0.078	0.787	5.554	0.159	0.043	50.116	98.243		71.4707	0.183491	10.8949	2.47338	0.0529392	0.0016579	0.626842	0.087087	1.0608	6.69035	0.159	0.043	93.7441	0.076643	93.6674	5.14131	98.8087
Bully Creek Fm, OR	har94-15	33.243	0.165	5.835	1.888	0.024	0.003	0.501	0.067	1.272	6.023	0.252	0.033	49.954	99.26		71.1134	0.275236	11.0252	2.69927	0.0309888	0.0049737	0.700999	0.0748055	1.71453	7.25531	0.252	0.033	95.1798	0.113546	95.0662	4.71177	99.778
Bully Creek Fm, OR	har94-15	33.713	0.144	5.854	1.676	0.024	0.021	0.443	0.067	0.98	5.91	0.242	0.032	50.946	100.052		72.1188	0.240206	11.0611	2.39618	0.0309888	0.0348159	0.619846	0.0748055	1.32094	7.11919	0.242	0.032	95.291	0.10911	95.1818	5.47265	100.654
Virgin Valley, NV	vvy93-08	32.976	0.146	5.984	2.04	0.032	0.019	0.514	0.078	1.137	4.998	0.163	0.028	52.04	100.155		70.5423	0.243543	11.3068	2.91659	0.0413184	0.0315001	0.719189	0.087087	1.53256	6.02059	0.163	0.028	93.6324	0.074945	93.5575	7.41609	100.974
Virgin Valley, NV	vvy93-08	32.731	0.118	5.956	2.012	0.065	0.007	0.473	0.068	1.187	4.96	0.175	0.041	51.533	99.326		70.0182	0.196836	11.2539	2.87656	0.083928	0.0116053	0.661822	0.075922	1.59996	5.97482	0.175	0.041	92.9695	0.0829289	92.8865	7.23831	100.125
Virgin Valley, NV	vvy93-08	32.503	0.151	5.936	2.06	0.059	0.017	0.511	0.117	0.99	4.837	0.156	0.033	51.34	98.71		69.5304	0.251883	11.2161	2.94518	0.0761808	0.0281843	0.714991	0.130631	1.33442	5.82665	0.156	0.033	92.2436	0.073125	92.1705	7.35088	99.5214
Virgin Valley, NV	vvy93-08	32.494	0.132	5.91	2.077	0.022	0.015	0.518	0.151	0.979	4.882	0.206	0.037	51.651	99.074		69.5112	0.220189	11.1669	2.96949	0.0284064	0.0248685	0.724786	0.168592	1.31959	5.88086	0.206	0.037	92.2579	0.0950796	92.1628	7.76901	99.9318
Virgin Valley, NV	vvy93-08	32.403	0.149	5.901	2.097	0.047	0.018	0.553	0.074	0.775	4.201	0.027	0.04	51.152	97.437		69.3165	0.248547	11.1499	2.99808	0.0606864	0.0298422	0.773758	0.082621	1.04462	5.06052	0.027	0.04	90.8321	0.0203876	90.8117	7.44743	98.2592
Virgin Valley, NV	vvy93-08	32.623	0.152	5.894	2.062	0.064	0.019	0.509	0.127	1.144	4.917	0.202	0.039	50.775	98.527		69.7871	0.253551	11.1367	2.94804	0.0826368	0.0315001	0.712193	0.141796	1.542	5.92302	0.202	0.039	92.7996	0.0938463	92.7057	6.54285	99.2486
Virgin Valley, NV	vvy93-08	32.676	0.178	5.892	2.007	0.047	0.024	0.477	0.075	1.633	5.316	0.136	0.046	50.525	99.032		69.9005	0.296922	11.1329	2.86941	0.0606864	0.0397896	0.667418	0.0837375	2.20112	6.40365	0.136	0.046	93.8382	0.0676352	93.7705	5.91305	99.6836
Virgin Valley, NV	vvy93-08	33.666	0.128	5.873	1.615	0.01	0.008	0.394	0.004	1.274	5.311	0.177	0.032	50.789	99.281		72.0183	0.213517	11.097	2.30897	0.012912	0.0132632	0.551285	0.004466	1.71722	6.39763	0.177	0.032	94.5436	0.0817416	94.4619	5.41532	99.8772
Virgin Valley, NV	vvy93-08	32.135	0.165	5.857	2.12	0.021	0.013	0.517	0.113	1.019	4.845	0.137	0.034	50.953	97.929		68.7432	0.275236	11.0668	3.03096	0.0271152	0.0215527	0.723386	0.126165	1.37351	5.83629	0.137	0.034	91.3952	0.0653505	91.3299	7.41803	98.7479
Virgin Valley, NV	vvy93-08	33.287	0.135	5.844	1.742	0.033	0.008	0.416	0.108	0.845	4.398	0.081	0.032	51.566	98.495		71.2076	0.225193	11.0422	2.49054	0.0426096	0.0132632	0.582067	0.120582	1.13898	5.29783	0.081	0.032	92.2738	0.0413206	92.2325	7.03916	99.2717
Virgin Valley, NV	vvy93-08	33.64	0.139	5.829	1.78	0.04	0.024	0.403	0.037	0.986	4.798	0.126	0.028	51.103	98.933		71.9627	0.231866	11.0139	2.54487	0.051648	0.0397896	0.563878	0.0413105	1.32903	5.77967	0.126	0.028	93.7126	0.059366	93.6533	5.9335	99.5868
Virgin Valley, NV	vvy93-08	33.067	0.151	5.818	1.756	0.022	0.015	0.42	0.082	0.992	4.839	0.155	0.033	50.774	98.124		70.7369	0.251883	10.9931	2.51055	0.0284064	0.0248685	0.587664	0.091553	1.33712	5.82906	0.155	0.033	92.5791	0.072704	92.5064	6.31364	98.8201
Virgin Valley, NV	vvy93-08	31.977	0.165	5.809	1.989	0.054	0.03	0.505	0.1	1.448	5.305	0.261	0.031	50.492	98.166		68.4052	0.275236	10.9761	2.84367	0.0697248	0.049737	0.706596	0.11165	1.95176	6.3904	0.261	0.031	92.0721	0.116885	91.9552	6.98116	98.9364
Virgin Valley, NV	vvy93-08	33.474	0.108	5.794	1.66	0.028	0.013	0.402	0.033	1.285	5.172	0.189	0.038	50.1	98.296		71.6076	0.180155	10.9478	2.3733	0.0361536	0.0215527	0.562478	0.0368445	1.73205	6.23019	0.189	0.038	93.9551	0.0881472	93.8669	4.97654	98.8435
Virgin Valley, NV	vvy93-08	33.213	0.139	5.79	1.728	0.018	0.01	0.41	0.071	0.866	4.446	0.087	0.045	51.877	98.7		71.0492	0.231866	10.9402	2.47052	0.0232416	0.016579	0.573672	0.0792715	1.16728	5.35565	0.087	0.045	92.0395	0.0467781	91.9928	7.53954	99.5323
Virgin Valley, NV	vvy93-08	33.108	0.076	5.774	1.683	0.068	0.021	0.407	0.074	1.606	5.375	0.168	0.04	50.546	98.946		70.8246	0.126776	10.91	2.40619	0.0878016	0.0348159	0.569474	0.082621	2.16473	6.47472	0.168	0.04	93.8897	0.079756	93.81	5.77189	99.5819
Virgin Valley, NV	vvy93-08	32.791	0.116	5.65	1.694	0.034	0.003	0.41	0.049	1.351	5.249	0.208	0.041	50.168	97.764		70.1465	0.1935	10.6757	2.42191	0.0439008	0.0049737	0.573672	0.0547085	1.82101	6.32295	0.208	0.041	92.5078	0.0968236	92.411	6.01608	98.4271
Beatys Butte, OR	85cs-bb2	34.21	0.155	5.99	1.72	0.055	0.02	0.448	0.072	1.94	4.36	0.19	0.026	51.56	100.746		73.182	0.258555	11.3181	2.45908	0.071016	0.033158	0.626842	0.080388	2.61493	5.25206	0.19	0.026	96.1122	0.0858625	96.0263	5.30341	101.33
Beatys Butte, OR	85cs-bb2	34.34	0.135	5.96	1.76	0.048	0.009	0.427	0.007	1.85	4.69	0.203	0.035	51.58	101.044		73.4601	0.225193	11.2614	2.51627	0.0619776	0.0149211	0.597458	0.0078155	2.49362	5.64957	0.203	0.035	96.5264	0.0933655	96.433	5.18108	101.614
Beatys Butte, OR	85cs-bb2	34.39	0.117	6.01	1.79	0.069	0.023	0.434	0.049	1.91	4.76	0.216	0.027	51.04	100.835		73.5671	0.195168	11.3559	2.55916	0.0890928	0.0381317	0.607253	0.0547085	2.57449	5.7339	0.216	0.027	97.0179	0.0970353	96.9208	4.39711	101.318
Beatys Butte, OR	85cs-bb2	34.37	0.108	6	1.8	0.023	0.018	0.416	0.005	1.94	4.45	0.277	0.052	51.35	100.809		73.5243	0.180155	11.337	2.57346	0.0296976	0.0298422	0.582067	0.0055825	2.61493	5.36047	0.277	0.052	96.5665	0.128356	96.4381	4.91093	101.349
Beatys Butte, OR	85cs-bb2	34.43	0.159	6	1.8	0.043	0.019	0.421	0.022	2.21	4.4	0.166	0.029	51.11	100.809		73.6527	0.265228	11.337	2.57346	0.0555216	0.0315001	0.589063	0.024563	2.97886	5.30024	0.166	0.029	97.0031	0.0764336	96.9267	4.36135	101.288
Beatys Butte, OR	85cs-bb2	34.28	0.139	5.92	1.81	0.027	0.004	0.449	0.102	2.16	4.57	0.214	0.052	50.82	100.547		73.3318	0.231866	11.1858	2.58776	0.0348624	0.0066316	0.628241	0.113883	2.91146	5.50502	0.214	0.052	96.8033	0.10183	96.7015	4.31988	101.021
Beatys Butte, OR	85cs-bb2	34.31	0.126	6.02	1.82	0.072	0	0.448	0	2.13	4.42	0.224	0.024	51.35	100.944		73.396	0.210181	11.3748	2.60205	0.0929664	0	0.626842	0	2.87103	5.32433	0.224	0.024	96.7461	0.0997273	96.6464	4.82852	101.475
Beatys Butte, OR	85cs-bb2	34.41	0.119	5.95	1.85	0.043	0.004	0.443	0	1.94	4.33	0.193	0.049	51.77	101.101		73.6099	0.198504	11.2425	2.64494	0.0555216	0.0066316	0.619846	0	2.61493	5.21592	0.193	0.049	96.4507	0.0923116	96.3584	5.32918	101.688
Beatys Butte, OR	85cs-bb2	34.16	0.15	6.19	1.98	0.062	0.017	0.531	0.147	2.09	4.54	0.205	0.047	51.59	101.709		73.0751	0.250215	11.696	2.83081	0.0800544	0.0281843	0.742975	0.164126	2.81711	5.46888	0.205	0.047	97.4054	0.0969133	97.3085	4.94422	102.253
Beatys Butte, OR	85cs-bb2	33.82	0.146	6.16	2.03	0.051	0.028	0.546	0.087	2.01	4.5	0.177	0.042	50.96	100.557		72.3477	0.243543	11.6393	2.90229	0.0658512	0.0464212	0.763963	0.0971355	2.70928	5.4207	0.177	0.042	96.4552	0.0839964	96.3713	4.70272	101.074
Beatys Butte, OR	85cs-bb2	33.9	0.162	6.2	2.05	0.053	0.018	0.551	0.107	2.23	4.42	0.264	0.053	51.14	101.148		72.5189	0.270232	11.7149	2.93088	0.0684336	0.0298422	0.770959	0.119466	3.00582	5.32433	0.264	0.053	97.0707	0.123108	96.9476	4.71914	101.667
Beatys Butte, OR	85cs-bb2	34.01	0.142	6.17	2.07	0.079	0.024	0.546	0.114	2.18	4.76	0.16	0.023	50.41	100.688		72.7542	0.23687	11.6582	2.95948	0.102005	0.0397896	0.763963	0.127281	2.93842	5.7339	0.16	0.023	97.4971	0.0725544	97.4246	3.66507	101.09
Beatys Butte, OR	85cs-bb2	33.97	0.141	6.17	2.09	0.04	0.018	0.558	0.078	2.22	4.4	0.178	0.057	50.76	100.68		72.6686	0.235202	11.6582	2.98807	0.051648	0.0298422	0.780754	0.087087	2.99234	5.30024	0.178	0.057	97.027	0.0877997	96.9392	4.20211	101.141
Beatys Butte, OR	85cs-bb2	33.84	0.157	6.15	2.09	0.058	0.018	0.553	0.164	2.28	4.52	0.151	0.043	50.82	100.844		72.3905	0.261892	11.6204	2.98807	0.0748896	0.0298422	0.773758	0.183106	3.07321	5.44479	0.151	0.043	97.0345	0.0732746	96.9612	4.36182	101.323
Beatys Butte, OR	85cs-bb2	33.85	0.133	6.22	2.09	0.043	0.027	0.552	0.097	2.3	4.41	0.19	0.034	50.88	100.826		72.4119	0.221857	11.7527	2.98807	0.0555216	0.0447633	0.772358	0.108301	3.10017	5.31229	0.19	0.034	96.9919	0.0876663	96.9043	4.40568	101.31
Beatys Butte, OR	85cs-bb2	33.9	0.123	6.17	2.1	0.051	0.023	0.543	0.044	2.27	4.35	0.169	0.039	50.61	100.392		72.5189	0.205176	11.6582	3.00237	0.0658512	0.0381317	0.759766	0.049126	3.05973	5.24001	0.169	0.039	96.8053	0.0799516	96.7253	4.11879	100.844
Beatys Butte, OR	85cs-bb2	33.97	0.184	6.18	2.11	0.047	0.013	0.566	0.116	2.27	4.43	0.211	0.042	51.05	101.189		72.6686	0.30693	11.6771	3.01667	0.0606864	0.0215527	0.791947	0.129514	3.05973	5.33638	0.211	0.042	97.3221	0.0983122	97.2238	4.45454	101.678
Beatys Butte, OR	85cs-bb2	33.92	0.156	6.12	2.12	0.066	0.009	0.533	0.09	2.15	4.32	0.191	0.043	50.94	100.658		72.5617	0.260224	11.5637	3.03096	0.0852192	0.0149211	0.745774	0.100485	2.89799	5.20387	0.191	0.043	96.6988	0.0901167	96.6087	4.54918	101.158
Beatys Butte, OR	85cs-bb2	34.04	0.16	6.15	2.14	0.043	0.029	0.555	0.102	2.26	4.36	0.168	0.046	51.05	101.103		72.8184	0.266896	11.6204	3.05956	0.0555216	0.0480791	0.776556	0.113883	3.04625	5.25206	0.168	0.046	97.2716	0.0811089	97.1905	4.39529	101.586
Beatys Butte, OR	85cs-bb2	34.09	0.152	6.16	2.14	0.035	0.01	0.53	0.142	2.17	4.38	0.186	0.026	51.15	101.171		72.9253	0.253551	11.6393	3.05956	0.045192	0.016579	0.741576	0.158543	2.92494	5.27615	0.186	0.026	97.2527	0.0841782	97.1686	4.49644	101.665
Beatys Butte, OR	85cs-bb2	33.88	0.126	6.08	2.15	0.055	0.018	0.546	0.052	2.13	4.44	0.214	0.04	50.87	100.601		72.4761	0.210181	11.4882	3.07386	0.071016	0.0298422	0.763963	0.058058	2.87103	5.34842	0.214	0.04	96.6446	0.0991244	96.5455	4.5562	101.102
Beatys Butte, OR	85cs-bb2	33.85	0.155	6.16	2.16	0.05	0.027	0.531	0.107	2.23	4.44	0.158	0.043	50.9	100.811		72.4119	0.258555	11.6393	3.08815	0.06456	0.0447633	0.742975	0.119466	3.00582	5.34842	0.158	0.043	96.925	0.0762219	96.8487	4.45129	101.3
Beatys Butte, OR	85cs-bb2	33.84	0.14	6.15	2.16	0.035	0.02	0.55	0.121	2.28	4.42	0.236	0.033	50.79	100.775		72.3905	0.233534	11.6204	3.08815	0.045192	0.033158	0.76956	0.135097	3.07321	5.32433	0.236	0.033	96.9822	0.106809	96.8754	4.38081	101.256
Beatys Butte, OR	85cs-bb2	33.7	0.132	6.08	2.16	0.037	0.018	0.555	0.089	1.93	4.67	0.199	0.038	51.07	100.678		72.091	0.220189	11.4882	3.08815	0.0477744	0.0298422	0.776556	0.0993685	2.60145	5.62548	0.199	0.038	96.305	0.0923577	96.2127	5.01727	101.23
Mascall ash
Mascall Fm, OR	CPB-09-05	32.595	0.081	6.448	1.814	0.06	0	0.605	0.168	2.372	4.045	0.084297	0.045	51.316	99.6333		69.7272	0.135116	12.1835	2.59348	0.077472	0	0.846516	0.187572	3.19722	4.87261	0.084297	0.045	93.95	0.04564	93.9044	6.439	100.343
Mascall Fm, OR	CPB-09-05	32.552	0.151	6.435	1.816	0.052	0.005	0.626	0.16	2.568	3.822	0.0472367	0.052	51.107	99.3932		69.6352	0.251883	12.1589	2.59634	0.0671424	0.0082895	0.875899	0.17864	3.46141	4.60398	0.0472367	0.052	93.937	0.0316141	93.9054	6.16782	100.073
Mascall Fm, OR	CPB-09-05	32.998	0.105	6.429	1.808	0.051	0	0.605	0.176	2.725	3.761	0.098478	0.042	50.762	99.5605		70.5893	0.17515	12.1476	2.5849	0.0658512	0	0.846516	0.196504	3.67303	4.5305	0.098478	0.042	94.9498	0.0509345	94.8989	5.23817	100.137
Mascall Fm, OR	CPB-09-05	32.839	0.076	6.388	1.776	0.064	0	0.616	0.1	2.148	4.205	0.0694429	0.056	50.97	99.3074		70.2492	0.126776	12.0701	2.53915	0.0826368	0	0.861907	0.11165	2.89529	5.06534	0.0694429	0.056	94.1275	0.041866	94.0856	5.86845	99.9541
Mascall Fm, OR	CPB-09-05	32.918	0.055	6.522	1.81	0.017	0.009	0.606	0.152	2.8	3.87	0.0344176	0.041	50.702	99.5364		70.4182	0.0917455	12.3233	2.58776	0.0219504	0.0149211	0.847915	0.169708	3.77412	4.6618	0.0344176	0.041	94.9868	0.0237363	94.9631	5.13888	100.102
Mascall Fm, OR	CPB-09-05	32.599	0.073	6.523	1.731	0.054	0.003	0.587	0.175	2.3	3.877	0.0918	0.061	52.031	100.106		69.7358	0.121771	12.3252	2.47481	0.0697248	0.0049737	0.82133	0.195387	3.10017	4.67023	0.0918	0.061	93.6722	0.0524068	93.6198	7.29072	100.911
Mascall Fm, OR	CPB-09-05	32.958	0.087	6.52	1.777	0.083	0.002	0.602	0.189	2.815	3.514	0.0394128	0.047	51.415	100.048		70.5038	0.145125	12.3195	2.54058	0.10717	0.0033158	0.842318	0.211018	3.79434	4.23296	0.0394128	0.047	94.7865	0.0271924	94.7593	5.94412	100.703
Mascall Fm, OR	CPB-09-05	33.075	0.102	6.511	1.835	0.053	0	0.593	0.126	2.839	3.749	0.0146637	0.056	51.046	99.9997		70.754	0.170146	12.3025	2.6235	0.0684336	0	0.829726	0.140679	3.82669	4.51605	0.0146637	0.056	95.3025	0.018801	95.2837	5.29941	100.583
Mascall Fm, OR	CPB-09-05	32.935	0.138	6.503	1.85	0.022	0	0.616	0.153	3.112	3.118	0.0952114	0.052	51.421	100.015		70.4546	0.230198	12.2874	2.64494	0.0284064	0	0.861907	0.170824	4.19466	3.75594	0.0952114	0.052	94.7761	0.0518139	94.7243	5.94628	100.671
Mascall Fm, OR	CPB-09-05	32.779	0.115	6.435	1.844	0.032	0.002	0.628	0.165	2.764	3.637	0.0583923	0.041	51.41	99.9104		70.1208	0.191831	12.1589	2.63637	0.0413184	0.0033158	0.878698	0.184223	3.7256	4.38113	0.0583923	0.041	94.4216	0.0338309	94.3878	6.20685	100.595
Mascall Fm, OR	CPB-09-05	32.795	0.089	6.548	1.88	0.059	0.008	0.587	0.151	2.927	3.399	0.0633067	0.042	51.172	99.7203		70.1551	0.148461	12.3724	2.68784	0.0761808	0.0132632	0.82133	0.168592	3.9453	4.09444	0.0633067	0.042	94.5882	0.0361256	94.5521	5.80819	100.36
Mascall Fm, OR	CPB-09-05	32.853	0.113	6.478	1.777	0.068	0	0.593	0.168	2.597	3.642	0.0814128	0.067	50.94	99.3774		70.2791	0.188495	12.2402	2.54058	0.0878016	0	0.829726	0.187572	3.5005	4.38715	0.0814128	0.067	94.3896	0.0493862	94.3402	5.66084	100.001
Mascall Fm, OR	CPB-09-05	32.928	0.096	6.416	1.787	0.026	0	0.616	0.141	1.939	3.622	0.0441112	0.051	51.491	99.1571		70.4396	0.160138	12.123	2.55487	0.0335712	0	0.861907	0.157426	2.61358	4.36306	0.0441112	0.051	93.4023	0.0300726	93.3722	6.50195	99.8742
Mascall Fm, OR	CPB-09-05	33.163	0.112	6.493	1.829	0.051	0.008	0.611	0.18	3.056	3.428	0.0428447	0.047	51.093	100.114		70.9423	0.186827	12.2685	2.61492	0.0658512	0.0132632	0.854911	0.20097	4.11918	4.12937	0.0428447	0.047	95.486	0.0286374	95.4573	5.23249	100.69
Mascall Fm, OR	CPB-09-05	32.769	0.084	6.416	1.804	0.019	0	0.6	0.166	2.628	3.58	0.00959858	0.05	51.188	99.3136		70.0994	0.14012	12.123	2.57918	0.0245328	0	0.83952	0.185339	3.54228	4.31247	0.00959858	0.05	93.9055	0.0153155	93.8902	6.09528	99.9855
Mascall Fm, OR	CPB-09-05	34.304	0.149	6.6	1.944	0.009	0	0.624	0.172	1.508	3.426	0.0743767	0.039	51.2016	100.051		73.3831	0.248547	12.4707	2.77934	0.0116208	0	0.873101	0.192038	2.03263	4.12696	0.0743767	0.039	96.2314	0.0401102	96.1913	4.33577	100.527
Mascall Fm, OR	CPB-09-05	33.376	0.043	6.559	1.812	0.017	0	0.635	0.068	1.615	3.227	0.0333573	0.05	50.9525	98.3879		71.3979	0.0717283	12.3932	2.59062	0.0219504	0	0.888492	0.075922	2.17686	3.88724	0.0333573	0.05	93.5873	0.0253191	93.562	5.42297	98.985
Mascall Fm, OR	CPB-09-05	33.896	0.139	6.647	1.793	0.041	0	0.662	0.227	1.447	3.787	0.0109303	0.066	51.6004	100.316		72.5103	0.231866	12.5595	2.56345	0.0529392	0	0.92627	0.253446	1.95041	4.56182	0.0109303	0.066	95.687	0.0194839	95.6675	5.22371	100.891
Mascall Fm, OR	CPB-09-05	34.081	0.163	6.71	1.922	0.035	0.001	0.624	0.177	1.761	2.92	0	0.072	51.2765	99.7425		72.9061	0.2719	12.6785	2.74788	0.045192	0.0016579	0.873101	0.197621	2.37365	3.51743	0	0.072	95.6851	0.0162345	95.6688	4.5766	100.245
Mascall Fm, OR	CPB-09-05	33.859	0.058	6.7	1.825	0.049	0	0.588	0.143	1.673	2.97	0.0569653	0.078	51.3495	99.3495		72.4312	0.0967498	12.6596	2.6092	0.0632688	0	0.82273	0.159659	2.25504	3.57766	0.0569653	0.078	94.8101	0.0415728	94.7685	5.14736	99.9159
Mascall Fm, OR	CPB-09-06	34.277	0.11	6.794	1.91	0.009	0	0.69	0.198	1.671	3.243	0.089402	0.093	51.3411	100.425		73.3254	0.183491	12.8373	2.73073	0.0116208	0	0.965448	0.221067	2.25234	3.90652	0.089402	0.093	96.6162	0.0586125	96.5576	4.34502	100.903
Mascall Fm, OR	CPB-09-06	33.836	0.106	6.799	1.936	0.066	0.016	0.614	0.16	1.656	3.157	0.036618	0.068	51.2325	99.6831		72.382	0.176819	12.8467	2.7679	0.0852192	0.0265264	0.859109	0.17864	2.23212	3.80292	0.036618	0.068	95.4626	0.0307507	95.4318	4.77645	100.208
Mascall Fm, OR	CPB-09-06	34.363	0.077	6.716	1.867	0.049	0.011	0.636	0.168	1.111	3.893	0.0926987	0.052	52.136	101.172		73.5093	0.128444	12.6899	2.66925	0.0632688	0.0182369	0.889891	0.187572	1.49752	4.68951	0.0926987	0.052	96.4876	0.050756	96.4368	5.32035	101.757
Mascall Fm, OR	CPB-09-06	34.202	0.158	6.756	1.85	0.098	0	0.646	0.136	1.699	3.131	0	0.065	51.6959	100.437		73.1649	0.26356	12.7655	2.64494	0.126538	0	0.903883	0.151844	2.29008	3.7716	0	0.065	96.1478	0.0146561	96.1332	4.83546	100.969
Mascall Fm, OR	CPB-09-06	33.797	0.048	6.69	1.841	0.052	0.002	0.58	0.121	1.857	3.05	0.0164828	0.079	51.5808	99.7142		72.2985	0.0800688	12.6408	2.63208	0.0671424	0.0033158	0.811536	0.135097	2.50305	3.67403	0.0164828	0.079	94.9411	0.024753	94.9163	5.39146	100.308
Mascall Fm, OR	CPB-09-06	34.141	0.154	6.698	1.769	0.058	0.01	0.649	0.14	1.619	3.129	0.077654	0.039	51.592	100.076		73.0344	0.256887	12.6559	2.52914	0.0748896	0.016579	0.908081	0.15631	2.18225	3.76919	0.077654	0.039	95.7003	0.0414901	95.6588	4.96273	100.622
Mascall Fm, OR	CPB-09-06	34.2	0.144	6.797	1.787	0.078	0	0.632	0.166	1.756	3.271	0.0231112	0.047	51.474	100.375		73.1606	0.240206	12.8429	2.55487	0.100714	0	0.884294	0.185339	2.36691	3.94025	0.0231112	0.047	96.3463	0.0203286	96.3259	4.54907	100.875
Mascall Fm, OR	CPB-09-06	33.967	0.096	6.782	2.055	0.052	0.006	0.621	0.13	1.85	3.304	-0.00197058	0.044	51.5967	100.502		72.6622	0.160138	12.8146	2.93803	0.0671424	0.0099474	0.868903	0.145145	2.49362	3.98	-0.00197058	0.044	96.1817	0.00909136	96.1727	4.86393	101.037
Mascall Fm, OR	CPB-09-06	34.301	0.101	6.711	1.856	0.075	0	0.632	0.077	2.038	3.089	0.10403	0.063	51.6182	100.665		73.3767	0.168478	12.6804	2.65352	0.09684	0	0.884294	0.0859705	2.74702	3.72101	0.10403	0.063	96.5813	0.0580075	96.5233	4.65345	101.177
Mascall Fm, OR	CPB-09-06	33.714	0.096	6.706	1.993	0.023	0	0.637	0.092	1.581	3.541	0	0.034	52.0077	100.425		72.121	0.160138	12.671	2.84939	0.0296976	0	0.89129	0.102718	2.13103	4.26549	0	0.034	95.2557	0.00766629	95.2481	5.81752	101.066
Mascall Fm, OR	CPB-09-06	34.421	0.105	6.871	1.909	0.026	0	0.674	0.156	1.954	2.771	0	0.042	51.0995	100.029		73.6334	0.17515	12.9828	2.7293	0.0335712	0	0.943061	0.174174	2.6338	3.33795	0	0.042	96.6852	0.00947012	96.6757	3.76563	100.441
Mascall Fm, OR	CPB-09-06	34.108	0.197	6.864	1.862	0.032	0.002	0.631	0.13	1.402	3.432	0.0488495	0.058	52.2961	101.063		72.9638	0.328616	12.9695	2.6621	0.0413184	0.0033158	0.882895	0.145145	1.88976	4.13419	0.0488495	0.058	96.1275	0.033646	96.0939	5.5839	101.678
Mascall Fm, OR	CPB-09-06	34.143	0.12	6.724	1.907	0.038	0.006	0.637	0.075	1.83	2.863	0.101493	0.041	51.6557	100.141		73.0387	0.200172	12.705	2.72644	0.0490656	0.0099474	0.89129	0.0837375	2.46666	3.44877	0.101493	0.041	95.7623	0.0519783	95.7103	4.97851	100.689
Mascall Fm, OR	CPB-09-06	34.183	0.13	6.612	1.882	0.066	0.009	0.67	0.155	1.024	3.313	0.00324641	0.081	52.4234	100.552		73.1243	0.216853	12.4934	2.6907	0.0852192	0.0149211	0.937464	0.173058	1.38025	3.99084	0.00324641	0.081	95.1912	0.0196307	95.1716	6.04636	101.218
Mascall Fm, OR	CPB-09-06	34.285	0.091	6.662	1.847	0.061	0	0.65	0.153	1.975	3.418	0.0803019	0.05	51.4487	100.721		73.3425	0.151797	12.5878	2.64066	0.0787632	0	0.90948	0.170824	2.6621	4.11732	0.0803019	0.05	96.7916	0.0450853	96.7465	4.46509	101.212
Mascall Fm, OR	CPB-09-06	33.955	0.082	6.606	1.964	0.049	0	0.616	0.143	1.563	3.382	0.103774	0.066	51.9422	100.472		72.6365	0.136784	12.482	2.80793	0.0632688	0	0.861907	0.159659	2.10677	4.07396	0.103774	0.066	95.4986	0.0585758	95.44	5.65465	101.095
Mascall Fm, OR	CPB-09-06	33.882	0.139	6.688	1.934	0.084	0	0.608	0.136	1.36	3.405	0.145678	0.102	51.8364	100.32		72.4804	0.231866	12.637	2.76504	0.108461	0	0.850714	0.151844	1.83314	4.10166	0.145678	0.102	95.4078	0.0843371	95.3234	5.61497	100.938
Mascall Fm, OR	CPB-09-06	33.753	0.139	6.572	1.745	0.069	0	0.626	0.156	1.446	2.865	-0.00262222	0.036	51.8167	99.2211		72.2044	0.231866	12.4178	2.49483	0.0890928	0	0.875899	0.174174	1.94906	3.45118	-0.00262222	0.036	93.9217	0.00701316	93.9147	5.96356	99.8782
Mascall Fm, OR	CPB-09-06	33.982	0.096	6.768	1.853	0.087	0	0.627	0.107	1.68	3.163	0.0861209	0.052	51.5695	100.071		72.6943	0.160138	12.7881	2.64923	0.112334	0	0.877298	0.119466	2.26447	3.81015	0.0861209	0.052	95.6136	0.0479864	95.5657	5.06189	100.628
Mascall Fm, OR	CPB-09-06	34.12	0.101	6.934	1.834	0.046	0.003	0.601	0.064	1.346	3.55	0.256694	0.037	51.8102	100.703		72.9895	0.168478	13.1018	2.62207	0.0593952	0.0049737	0.840919	0.071456	1.81427	4.27633	0.256694	0.037	96.2429	0.116424	96.1265	5.14216	101.269
Mascall Fm, OR	CPB-09-06	33.88	0.029	6.578	1.89	0.101	0	0.593	0.164	1.025	3.723	0.123005	0.073	52.5058	100.685		72.4761	0.0483749	12.4291	2.70213	0.130411	0	0.829726	0.183106	1.3816	4.48473	0.123005	0.073	94.8613	0.0682516	94.7931	6.62199	101.415
Mascall Fm, OR	CPB-09-06	34.121	0.086	6.705	1.789	0.061	0	0.664	0.111	1.258	3.552	0.0840509	0.06	51.9029	100.394		72.9916	0.143457	12.6691	2.55773	0.0787632	0	0.929069	0.123932	1.69566	4.27874	0.0840509	0.06	95.6121	0.0489186	95.5632	5.42825	100.991
Mascall Fm, OR	CPB-09-07	34.775	0.096	6.765	1.919	0.02	0.014	0.63	0.087	2.354	3.091	0.0451306	0.036	50.5761	100.408		74.3907	0.160138	12.7825	2.74359	0.025824	0.0232106	0.881496	0.0971355	3.17296	3.72342	0.0451306	0.036	98.0821	0.0271196	98.0549	2.64114	100.696
Mascall Fm, OR	CPB-09-07	34.046	0.125	6.824	1.936	0.092	0	0.634	0.073	2.219	3.111	0.061618	0.049	49.8964	99.067		72.8312	0.208512	12.8939	2.7679	0.11879	0	0.887093	0.0815045	2.99099	3.74751	0.061618	0.049	96.6381	0.0369929	96.6011	2.76792	99.369
Mascall Fm, OR	CPB-09-07	34.656	0.172	6.808	1.956	0.037	0.009	0.614	0.141	2.243	3.11	0.103015	0.05	50.4095	100.308		74.1361	0.286913	12.8637	2.79649	0.0477744	0.0149211	0.859109	0.157426	3.02334	3.74631	0.103015	0.05	98.0851	0.0546486	98.0305	2.55639	100.587
Mascall Fm, OR	CPB-09-07	34.512	0.105	6.795	1.809	0	0.001	0.608	0.107	2.42	2.944	0	0.063	50.5565	99.9205		73.8281	0.17515	12.8392	2.58633	0	0.0016579	0.850714	0.119466	3.26192	3.54634	0	0.063	97.2718	0.0142052	97.2576	2.98943	100.247
Mascall Fm, OR	CPB-09-07	34.485	0.148	6.787	1.89	0.026	0	0.608	0.102	2.184	3.367	0.0430052	0.052	50.9403	100.632		73.7703	0.246879	12.824	2.70213	0.0335712	0	0.850714	0.113883	2.94381	4.05589	0.0430052	0.052	97.6362	0.0298324	97.6064	3.39787	101.004
Mascall Fm, OR	CPB-09-07	34.67	0.062	6.75	1.937	0.052	0.014	0.598	0.081	2.414	3.167	0.0325878	0.055	50.6314	100.464		74.1661	0.103422	12.7541	2.76933	0.0671424	0.0232106	0.836722	0.0904365	3.25383	3.81497	0.0325878	0.055	97.9668	0.0261225	97.9407	2.83231	100.773
Mascall Fm, OR	CPB-09-07	34.64	0.129	6.832	1.923	0.02	0.007	0.654	0.209	2.222	3.054	0.02301	0.016	50.4432	100.172		74.1019	0.215185	12.9091	2.74931	0.025824	0.0116053	0.915077	0.233348	2.99503	3.67885	0.02301	0.016	97.8742	0.0132961	97.8609	2.59382	100.455
Mascall Fm, OR	CPB-09-07	34.498	0.177	6.768	1.881	0.023	0	0.665	0.105	1.721	3.556	0.0162766	0.074	50.7072	100.191		73.7981	0.295254	12.7881	2.68927	0.0296976	0	0.930468	0.117233	2.31974	4.28356	0.0162766	0.074	97.3417	0.0235387	97.3182	3.22609	100.544
Mascall Fm, OR	CPB-09-07	34.447	0.143	6.858	1.844	0.063	0	0.69	0.148	1.92	3.511	0.0123923	0.039	50.8476	100.523		73.689	0.238538	12.9582	2.63637	0.0813456	0	0.965448	0.165242	2.58797	4.22935	0.0123923	0.039	97.6029	0.0140115	97.5889	3.29462	100.883
Mascall Fm, OR	CPB-09-07	34.766	0.177	6.985	1.849	0.043	0.001	0.615	0.101	2.297	2.991	0.128242	0.05	50.5031	100.506		74.3714	0.295254	13.1982	2.64352	0.0555216	0.0016579	0.860508	0.112767	3.09613	3.60296	0.128242	0.05	98.4161	0.0652704	98.3509	2.41855	100.769
Mascall Fm, OR	CPB-09-07	34.429	0.096	6.847	1.871	0.104	0.004	0.647	0.077	2.617	3.049	0.000578124	0.062	50.1857	99.9893		73.6505	0.160138	12.9374	2.67497	0.134285	0.0066316	0.905282	0.0859705	3.52745	3.67283	0.000578124	0.062	97.8181	0.0142231	97.8038	2.45232	100.256
Mascall Fm, OR	CPB-09-07	34.655	0.096	6.819	1.947	0.081	0.021	0.649	0.039	2.275	3.108	0	0.065	50.6482	100.403		74.134	0.160138	12.8845	2.78363	0.104587	0.0348159	0.908081	0.0435435	3.06647	3.7439	0	0.065	97.9286	0.0146561	97.914	2.79407	100.708
Mascall Fm, OR	CPB-09-07	34.661	0.21	6.749	1.961	0.043	0.023	0.611	0.111	2.198	2.921	0	0.066	50.74	100.294		74.1468	0.350301	12.7522	2.80364	0.0555216	0.0381317	0.854911	0.123932	2.96268	3.51864	0	0.066	97.6728	0.0148816	97.6579	2.95923	100.617
Mascall Fm, OR	CPB-09-07	34.363	0.177	6.81	1.855	0	0.002	0.614	0.096	2.032	3.797	0	0.068	50.4076	100.222		73.5093	0.295254	12.8675	2.65209	0	0.0033158	0.859109	0.107184	2.73893	4.57387	0	0.068	97.6746	0.0153326	97.6592	2.8763	100.536
Mascall Fm, OR	CPB-09-07	34.68	0.081	6.821	2.053	0.106	0	0.681	0.143	2.431	3.074	0.0770897	0.073	50.2671	100.487		74.1875	0.135116	12.8883	2.93517	0.136867	0	0.952855	0.159659	3.27674	3.70294	0.0770897	0.073	98.5252	0.0489188	98.4763	2.25598	100.732
Mascall Fm, OR	CPB-09-07	34.677	0.1	6.799	1.967	0.075	0.017	0.613	0.15	2.164	2.896	0.104683	0.039	50.563	100.165		74.181	0.16681	12.8467	2.81222	0.09684	0.0281843	0.85771	0.167475	2.91686	3.48852	0.104683	0.039	97.706	0.0528708	97.6532	2.81912	100.472
Mascall Fm, OR	CPB-09-07	34.614	0.105	6.957	1.954	0.075	0	0.627	0.126	2.59	3.074	0.104075	0.055	50.2185	100.5		74.0463	0.17515	13.1453	2.79363	0.09684	0	0.877298	0.140679	3.49106	3.70294	0.104075	0.055	98.6282	0.0562225	98.572	2.16215	100.734
Mascall Fm, OR	CPB-09-07	34.641	0.196	6.729	1.807	0.049	0.003	0.639	0.15	2.377	3.076	0.0675081	0.063	50.5677	100.365		74.104	0.326948	12.7144	2.58347	0.0632688	0.0049737	0.894089	0.167475	3.20396	3.70535	0.0675081	0.063	97.8985	0.0426297	97.8559	2.81666	100.673
Mascall Fm, OR	CPB-09-07	34.533	0.091	6.834	1.936	0.037	0.012	0.622	0.081	2.281	2.955	0.021618	0.044	50.402	99.8496		73.873	0.151797	12.9128	2.7679	0.0477744	0.0198948	0.870302	0.0904365	3.07456	3.55959	0.021618	0.044	97.4337	0.0190234	97.4147	2.73296	100.148
Mascall Fm, OR	CPB-09-07	34.763	0.081	6.954	2.041	0.029	0.004	0.656	0.161	2.262	2.925	0	0.052	50.2765	100.205		74.365	0.135116	13.1396	2.91802	0.0374448	0.0066316	0.917875	0.179757	3.04895	3.52345	0	0.052	98.3238	0.0117249	98.3121	2.12256	100.435
Mascall Fm, OR	CPB-09-07	34.504	0.177	6.78	1.925	0.035	0	0.65	0.173	2.597	3.08	0.0389497	0.049	50.6314	100.64		73.811	0.295254	12.8108	2.75217	0.045192	0	0.90948	0.193155	3.5005	3.71017	0.0389497	0.049	98.1156	0.0274484	98.0882	2.86482	100.953
Mascall Fm, OR	CPB-09-07	34.64	0.124	6.744	1.982	0.086	0.015	0.642	0.077	2.447	3.413	0.0562308	0.076	50.4544	100.757		74.1019	0.206844	12.7428	2.83367	0.111043	0.0248685	0.898286	0.0859705	3.29831	4.1113	0.0562308	0.076	98.5472	0.0408125	98.5064	2.52519	101.032
Bulley Creek Fm, OR	har94-01	33.647	0.106	6.561	1.808	0.08	0.002	0.602	0.151	2.518	4.103	0.196	0.062	50.076	99.912		71.9777	0.176819	12.397	2.5849	0.103296	0.0033158	0.842318	0.168592	3.39401	4.94247	0.196	0.062	96.8484	0.096506	96.7519	3.5489	100.301
Bulley Creek Fm, OR	har94-01	33.588	0.101	6.512	1.876	0.025	0	0.636	0.213	1.844	4.663	0.228	0.057	49.539	99.282		71.8514	0.168478	12.3044	2.68212	0.03228	0	0.889891	0.237815	2.48553	5.61705	0.228	0.057	96.554	0.108852	96.4452	3.18514	99.6303
Bulley Creek Fm, OR	har94-01	33.51	0.108	6.424	1.76	0.073	0	0.57	0.219	2.05	4.617	0.246	0.063	50.063	99.703		71.6846	0.180155	12.1381	2.51627	0.0942576	0	0.797544	0.244514	2.7632	5.56164	0.246	0.063	96.2893	0.117784	96.1715	3.96665	100.138
Bulley Creek Fm, OR	har94-01	33.723	0.115	6.476	1.875	0.05	0	0.58	0.244	2.803	3.824	0.223	0.048	50.067	100.028		72.1402	0.191831	12.2364	2.68069	0.06456	0	0.811536	0.272426	3.77816	4.60639	0.223	0.048	97.0532	0.104718	96.9485	3.45817	100.407
Bulley Creek Fm, OR	har94-01	33.489	0.101	6.456	1.77	0.033	0.001	0.587	0.155	2.041	4.615	0.193	0.045	50.388	99.874		71.6397	0.168478	12.1986	2.53057	0.0426096	0.0016579	0.82133	0.173058	2.75106	5.55923	0.193	0.045	96.1243	0.0914097	96.0329	4.31504	100.348
Bulley Creek Fm, OR	har94-01	33.519	0.11	6.501	1.746	0.046	0.004	0.585	0.235	1.987	4.5	0.243	0.049	50.07	99.595		71.7038	0.183491	12.2836	2.49626	0.0593952	0.0066316	0.818532	0.262377	2.67828	5.4207	0.243	0.049	96.2051	0.113364	96.0918	3.93487	100.027
Bulley Creek Fm, OR	har94-01	33.574	0.121	6.47	1.712	0.065	0	0.586	0.233	2.463	3.772	0.251	0.075	50.478	99.8		71.8215	0.20184	12.2251	2.44765	0.083928	0	0.819931	0.260145	3.31988	4.54375	0.251	0.075	96.0497	0.122595	95.9271	4.35082	100.278
Bulley Creek Fm, OR	har94-01	33.844	0.078	6.538	1.803	0.055	0.005	0.594	0.17	2.938	3.566	0.2	0.058	49.971	99.82		72.3991	0.130112	12.3536	2.57775	0.071016	0.0082895	0.831125	0.189805	3.96013	4.2956	0.2	0.058	97.0745	0.0972883	96.9772	3.19195	100.169
Bulley Creek Fm, OR	har94-01	33.633	0.093	6.478	1.722	0.059	0.01	0.571	0.274	2.566	3.952	0.192	0.048	49.902	99.5		71.9477	0.155133	12.2402	2.46194	0.0761808	0.016579	0.798943	0.305921	3.45871	4.76058	0.192	0.048	96.4619	0.0916651	96.3702	3.51476	99.885
Bulley Creek Fm, OR	har94-01	33.637	0.111	6.522	1.863	0.085	0.006	0.587	0.276	2.84	3.654	0.19	0.052	49.792	99.615		71.9563	0.185159	12.3233	2.66353	0.109752	0.0099474	0.82133	0.308154	3.82804	4.40161	0.19	0.052	96.8491	0.0917249	96.7574	3.20859	99.966
Bulley Creek Fm, OR	har94-01	33.521	0.086	6.514	1.771	0.024	0.012	0.601	0.202	2.424	3.995	0.209	0.066	49.817	99.242		71.7081	0.143457	12.3082	2.532	0.0309888	0.0198948	0.840919	0.225533	3.26731	4.81238	0.209	0.066	96.1638	0.102882	96.0609	3.5725	99.6334
Bulley Creek Fm, OR	har94-01	33.481	0.117	6.497	1.799	0.076	0.008	0.567	0.156	2.672	3.824	0.18	0.061	50.369	99.807		71.6226	0.195168	12.2761	2.57203	0.0981312	0.0132632	0.793346	0.174174	3.60159	4.60639	0.18	0.061	96.1937	0.0895437	96.1042	4.15949	100.264
Bulley Creek Fm, OR	har94-01	33.444	0.126	6.503	1.765	0.029	0.008	0.567	0.219	0.888	4.789	0.16	0.045	50.971	99.514		71.5434	0.210181	12.2874	2.52342	0.0374448	0.0132632	0.793346	0.244514	1.19694	5.76883	0.16	0.045	94.8238	0.077515	94.7462	5.35746	100.104
Bulley Creek Fm, OR	har94-01	33.703	0.123	6.536	1.819	0.066	0.005	0.594	0.198	2.59	4.176	0.238	0.055	49.74	99.843		72.0975	0.205176	12.3498	2.60062	0.0852192	0.0082895	0.831125	0.221067	3.49106	5.03041	0.238	0.055	97.2132	0.112612	97.1006	3.07896	100.18
Bulley Creek Fm, OR	har94-01	33.466	0.086	6.465	1.782	0.037	0	0.589	0.182	1.993	4.555	0.222	0.061	49.842	99.28		71.5905	0.143457	12.2156	2.54773	0.0477744	0	0.824129	0.203203	2.68636	5.48695	0.222	0.061	96.0287	0.107228	95.9215	3.77212	99.6936
Bulley Creek Fm, OR	har94-01	33.572	0.097	6.412	1.858	0.059	0	0.562	0.146	2.636	4.099	0.254	0.039	49.705	99.439		71.8172	0.161806	12.1155	2.65638	0.0761808	0	0.78635	0.163009	3.55306	4.93766	0.254	0.039	96.5601	0.115741	96.4444	3.36272	99.8071
Bulley Creek Fm, OR	har02-51	32.26	0.11	6.2	1.66	0.05	0	0.58	0.16	1.39	4.56	0	0.09	51.59	98.65		69.0106	0.183491	11.7149	2.3733	0.06456	0	0.811536	0.17864	1.87358	5.49298	0	0.09	91.7936	0.0202931	91.7733	7.73029	99.5036
Bulley Creek Fm, OR	har02-51	33.83	0.12	6.48	1.69	0.06	0.01	0.67	0.19	0.81	4.96	0.1	0.07	53.03	102.02		72.3691	0.200172	12.244	2.41619	0.077472	0.016579	0.937464	0.212135	1.0918	5.97482	0.1	0.07	95.7097	0.0578888	95.6518	7.15786	102.81
Bulley Creek Fm, OR	har02-51	34.01	0.11	6.53	1.75	0.04	0.01	0.63	0.15	1.54	4.6	0.03	0.05	52.94	102.39		72.7542	0.183491	12.3384	2.50197	0.051648	0.016579	0.881496	0.167475	2.07577	5.54116	0.03	0.05	96.5922	0.0239055	96.5683	6.54308	103.111
Bulley Creek Fm, OR	har02-51	33.91	0.11	6.55	1.77	0.04	0	0.67	0.12	0.75	4.97	0.03	0.07	53.43	102.42		72.5403	0.183491	12.3762	2.53057	0.051648	0	0.937464	0.13398	1.01093	5.98686	0.03	0.07	95.8514	0.0284151	95.823	7.41527	103.238
Bulley Creek Fm, OR	har02-51	33.85	0.11	6.5	1.77	0.07	0	0.65	0.24	1.24	4.65	0.15	0.05	53.15	102.43		72.4119	0.183491	12.2817	2.53057	0.090384	0	0.90948	0.26796	1.6714	5.60139	0.15	0.05	96.1483	0.0744319	96.0739	7.14428	103.218
Bulley Creek Fm, OR	har02-51	34.04	0.14	6.54	1.78	0.05	0.01	0.65	0.21	2.12	4.47	0	0.03	52.89	102.93		72.8184	0.233534	12.3573	2.54487	0.06456	0.016579	0.90948	0.234465	2.85755	5.38456	0	0.03	97.4513	0.00676437	97.4445	6.16483	103.609
Bulley Creek Fm, OR	har02-51	34.02	0.1	6.46	1.8	0.07	0	0.64	0.21	0.84	4.92	0.03	0.04	53.57	102.7		72.7756	0.16681	12.2062	2.57346	0.090384	0	0.895488	0.234465	1.13224	5.92663	0.03	0.04	96.0712	0.0216507	96.0496	7.47536	103.525
Bulley Creek Fm, OR	har02-51	34.03	0.09	6.55	1.82	0.05	0	0.64	0.19	2.09	4.8	0.08	0.05	52.4	102.79		72.797	0.150129	12.3762	2.60205	0.06456	0	0.895488	0.212135	2.81711	5.78208	0.08	0.05	97.8268	0.0449582	97.7818	5.62788	103.41
Bulley Creek Fm, OR	har02-51	33.8	0.09	6.57	1.82	0.05	0	0.65	0.26	1.77	4.63	0	0.05	53.03	102.72		72.305	0.150129	12.414	2.60205	0.06456	0	0.90948	0.29029	2.38578	5.5773	0	0.05	96.7486	0.011274	96.7373	6.72421	103.462
Bulley Creek Fm, OR	har02-51	33.79	0.09	6.53	1.83	0.07	0	0.65	0.19	1.66	5.11	0.07	0.04	52.46	102.49		72.2836	0.150129	12.3384	2.61635	0.090384	0	0.90948	0.212135	2.23751	6.15551	0.07	0.04	97.1035	0.0384928	97.065	6.09678	103.162
Bulley Creek Fm, OR	har02-51	33.73	0.13	6.53	1.85	0.04	0.01	0.62	0.25	1.68	5.23	0.11	0.05	52.48	102.71		72.1552	0.216853	12.3384	2.64494	0.051648	0.016579	0.867504	0.279125	2.26447	6.30006	0.11	0.05	97.2948	0.0575897	97.2372	6.15049	103.388
Bulley Creek Fm, OR	har02-51	33.63	0.11	6.55	1.88	0.04	0.01	0.65	0.12	0.84	4.69	0	0.05	52.62	101.19		71.9413	0.183491	12.3762	2.68784	0.051648	0.016579	0.90948	0.13398	1.13224	5.64957	0	0.05	95.1323	0.011274	95.1211	6.82127	101.942
Latah Fm, White Bird, ID	cpb00-33	33.064	0.102	6.322	1.696	0.067	0	0.564	0.132	1.642	4.443	0.138	0.056	51.785	100.011		70.7305	0.170146	11.9454	2.42477	0.0865104	0	0.789149	0.147378	2.21325	5.35204	0.138	0.056	94.0532	0.0707321	93.9824	6.776	100.758
Latah Fm, White Bird, ID	cpb00-33	33.092	0.122	6.399	1.715	0.054	0	0.612	0.126	0.999	4.3	0.188	0.062	51.808	99.477		70.7904	0.203508	12.0909	2.45194	0.0697248	0	0.85631	0.140679	1.34655	5.17978	0.188	0.062	93.3798	0.0931376	93.2867	6.95799	100.245
Latah Fm, White Bird, ID	cpb00-33	33.269	0.093	6.539	1.716	0.052	0	0.602	0.138	0.865	4.082	0.077	0.055	52.624	100.112		71.169	0.155133	12.3554	2.45337	0.0671424	0	0.842318	0.154077	1.16593	4.91718	0.077	0.055	93.4116	0.0448224	93.3668	7.58217	100.949
Latah Fm, White Bird, ID	cpb00-33	32.801	0.124	6.404	1.72	0.061	0.005	0.576	0.142	1.016	4.459	0.154	0.043	51.777	99.282		70.1679	0.206844	12.1004	2.45908	0.0787632	0.0082895	0.805939	0.158543	1.36947	5.37131	0.154	0.043	92.9235	0.0745377	92.849	7.23106	100.08
Latah Fm, White Bird, ID	cpb00-33	33.088	0.097	6.395	1.725	0.058	0.009	0.613	0.199	0.926	4.165	0.114	0.075	52.397	99.861		70.7818	0.161806	12.0834	2.46623	0.0748896	0.0149211	0.85771	0.222184	1.24816	5.01716	0.114	0.075	93.1173	0.0649109	93.0523	7.65358	100.706
Latah Fm, White Bird, ID	cpb00-33	32.918	0.097	6.315	1.725	0.025	0	0.615	0.181	1.021	4.39	0.157	0.066	52.31	99.82		70.4182	0.161806	11.9322	2.46623	0.03228	0	0.860508	0.202087	1.37621	5.28819	0.157	0.066	92.9607	0.0809869	92.8797	7.80171	100.681
Latah Fm, White Bird, ID	cpb00-33	33.141	0.09	6.421	1.738	0.047	0.001	0.593	0.162	0.958	4.179	0.132	0.05	51.818	99.33		70.8952	0.150129	12.1325	2.48482	0.0606864	0.0016579	0.829726	0.180873	1.29129	5.03402	0.132	0.05	93.2429	0.0668529	93.1761	6.91703	100.093
Latah Fm, White Bird, ID	cpb00-33	33.226	0.136	6.379	1.739	0.025	0	0.586	0.148	1.054	4.188	0.148	0.05	52.416	100.095		71.0771	0.226862	12.0531	2.48625	0.03228	0	0.819931	0.165242	1.42069	5.04486	0.148	0.05	93.5243	0.0735897	93.4507	7.46868	100.919
Latah Fm, White Bird, ID	cpb00-33	33.06	0.065	6.465	1.745	0.069	0	0.575	0.152	1.149	4.191	0.124	0.051	52.008	99.654		70.722	0.108426	12.2156	2.49483	0.0890928	0	0.80454	0.169708	1.54874	5.04848	0.124	0.051	93.3764	0.06371	93.3127	7.12786	100.441
Latah Fm, White Bird, ID	cpb00-33	33.135	0.158	6.4	1.753	0.067	0.005	0.568	0.117	1.247	4.291	0.184	0.058	52.223	100.206		70.8824	0.26356	12.0928	2.50626	0.0865104	0.0082895	0.794746	0.130631	1.68083	5.16894	0.184	0.058	93.857	0.0905515	93.7664	7.2384	101.005
Latah Fm, White Bird, ID	cpb00-33	33.102	0.069	6.371	1.758	0.058	0	0.616	0.158	1.149	4.23	0.182	0.064	51.8	99.557		70.8118	0.115099	12.038	2.51341	0.0748896	0	0.861907	0.176407	1.54874	5.09546	0.182	0.064	93.4817	0.0910622	93.3907	6.931	100.322
Latah Fm, White Bird, ID	cpb00-33	33.064	0.08	6.438	1.761	0.063	0	0.551	0.101	1.016	4.172	0.138	0.05	52.078	99.512		70.7305	0.133448	12.1646	2.5177	0.0813456	0	0.770959	0.112767	1.36947	5.02559	0.138	0.05	93.0944	0.0693792	93.025	7.29174	100.317
Latah Fm, White Bird, ID	cpb00-33	33.234	0.132	6.358	1.763	0.086	0	0.607	0.16	1.134	4.179	0.126	0.055	51.97	99.804		71.0942	0.220189	12.0134	2.52056	0.111043	0	0.849314	0.17864	1.52852	5.03402	0.126	0.055	93.7309	0.065454	93.6654	6.89971	100.565
Latah Fm, White Bird, ID	cpb00-33	33.087	0.144	6.381	1.767	0.046	0.006	0.574	0.163	0.969	3.977	0.08	0.056	52.131	99.381		70.7797	0.240206	12.0569	2.52628	0.0593952	0.0099474	0.803141	0.18199	1.30612	4.79069	0.08	0.056	92.8904	0.046311	92.8441	7.34792	100.192
Latah Fm, White Bird, ID	cpb00-33	32.997	0.105	6.355	1.792	0.038	0	0.577	0.168	0.968	4.277	0.138	0.051	52.433	99.899		70.5872	0.17515	12.0078	2.56202	0.0490656	0	0.807338	0.187572	1.30477	5.15207	0.138	0.051	93.0219	0.0696047	92.9523	7.80886	100.761
Latah Fm, White Bird, ID	cpb00-33	33.148	0.119	6.422	1.798	0.04	0.008	0.597	0.114	1.12	4.332	0.181	0.051	51.561	99.491		70.9102	0.198504	12.1344	2.5706	0.051648	0.0132632	0.835322	0.127281	1.50965	5.21833	0.181	0.051	93.8012	0.08771	93.7135	6.49359	100.207
Latah Fm, White Bird, ID	cpb00-33	33.211	0.118	6.429	1.811	0.06	0	0.579	0.148	0.962	4.271	0.099	0.065	52.066	99.819		71.045	0.196836	12.1476	2.58919	0.077472	0	0.810137	0.165242	1.29668	5.14485	0.099	0.065	93.637	0.0563404	93.5806	7.012	100.593
Latah Fm, White Bird, ID	cpb00-33	33.068	0.082	6.57	1.811	0.048	0	0.573	0.152	1.069	4.426	0.157	0.058	52.068	100.082		70.7391	0.136784	12.414	2.58919	0.0619776	0	0.801742	0.169708	1.44091	5.33156	0.157	0.058	93.8999	0.0791831	93.8208	7.03772	100.858
Latah Fm, White Bird, ID	cpb00-33	33.268	0.106	6.383	1.812	0.056	0	0.603	0.134	0.898	4.227	0.136	0.053	52.336	100.012		71.1669	0.176819	12.0607	2.59062	0.0723072	0	0.843718	0.149611	1.21041	5.09184	0.136	0.053	93.5519	0.0692136	93.4827	7.33929	100.822
Latah Fm, White Bird, ID	cpb00-33	33.042	0.102	6.331	1.813	0.067	0.001	0.567	0.129	0.879	4.276	0.134	0.045	51.951	99.337		70.6834	0.170146	11.9624	2.59205	0.0865104	0.0016579	0.793346	0.144029	1.1848	5.15087	0.134	0.045	92.9483	0.0665676	92.8817	7.25607	100.138
Latah Fm, White Bird, ID	cpb00-33	33.197	0.121	6.423	1.814	0.03	0	0.623	0.113	1.062	4.155	0.15	0.058	52.026	99.772		71.015	0.20184	12.1363	2.59348	0.038736	0	0.871702	0.126165	1.43147	5.00511	0.15	0.058	93.6278	0.0762357	93.5515	6.99186	100.543
Latah Fm, White Bird, ID	cpb00-33	33.367	0.106	6.505	1.839	0.05	0.006	0.613	0.158	1.1	4.153	0.13	0.06	52.251	100.338		71.3787	0.176819	12.2912	2.62922	0.06456	0.0099474	0.85771	0.176407	1.48269	5.0027	0.13	0.06	94.2599	0.0682656	94.1917	6.90842	101.1
Asotin grade, WA	CPB-09-09	33.968	0.163	6.589	1.897	0.037	0	0.632	0.143	1.756	2.667	0.00379407	0.058	51.3738	99.2876		72.6643	0.2719	12.4499	2.71214	0.0477744	0	0.884294	0.159659	2.36691	3.21267	0.00379407	0.058	94.8314	0.0146753	94.8167	5.02358	99.8403
Asotin grade, WA	CPB-09-09	34.082	0.096	6.663	1.959	0.063	0	0.642	0.158	1.74	2.644	0.0219244	0.052	51.8635	99.9845		72.9082	0.160138	12.5897	2.80078	0.0813456	0	0.898286	0.176407	2.34535	3.18496	0.0219244	0.052	95.2191	0.0209562	95.1982	5.37833	100.577
Asotin grade, WA	CPB-09-09	33.968	0.1	6.732	1.982	0.121	0	0.637	0.113	1.88	2.586	0.0382308	0.011	51.5255	99.6938		72.6643	0.16681	12.7201	2.83367	0.156235	0	0.89129	0.126165	2.53405	3.1151	0.0382308	0.011	95.257	0.0185775	95.2384	5.00606	100.244
Asotin grade, WA	CPB-09-09	34.088	0.148	6.633	1.945	0.049	0	0.626	0.173	1.783	2.543	0	0.057	51.7512	99.7962		72.921	0.246879	12.5331	2.78077	0.0632688	0	0.875899	0.193155	2.40331	3.0633	0	0.057	95.1377	0.0128523	95.1248	5.24906	100.374
Asotin grade, WA	CPB-09-09	34.102	0.067	6.826	1.84	0.037	0.023	0.614	0.192	1.967	2.583	0.082513	0.06	50.9282	99.3217		72.951	0.111763	12.8977	2.63065	0.0477744	0.0381317	0.859109	0.214368	2.65132	3.11148	0.082513	0.06	95.6558	0.048271	95.6076	4.17214	99.7797
Asotin grade, WA	CPB-09-09	34.334	0.076	6.761	1.918	0.035	0	0.68	0.193	2.148	2.741	0.111161	0.045	50.5958	99.6379		73.4473	0.126776	12.7749	2.74216	0.045192	0	0.951456	0.215485	2.89529	3.30181	0.111161	0.045	96.6565	0.0569511	96.5996	3.41187	100.011
Asotin grade, WA	CPB-09-09	34.299	0.153	6.783	1.946	0.066	0	0.372	0.071	1.965	1.645	0	0.005	49.5256	96.8306		73.3724	0.255219	12.8165	2.7822	0.0852192	0	0.520502	0.0792715	2.64862	1.98157	0	0.005	94.5465	0.0011274	94.5454	2.5647	97.1101
Asotin grade, WA	CPB-09-09	34.738	0.086	6.728	1.872	0.026	0	0.628	0.165	1.868	2.646	0.139548	0.058	51.2034	100.158		74.3115	0.143457	12.7126	2.6764	0.0335712	0	0.878698	0.184223	2.51788	3.18737	0.139548	0.058	96.8432	0.0718348	96.7714	3.80359	100.575
Asotin grade, WA	CPB-09-09	33.948	0.086	6.809	1.902	0.072	0.015	0.632	0.077	1.972	2.766	0.112643	0.06	51.2568	99.7085		72.6216	0.143457	12.8656	2.71929	0.0929664	0.0248685	0.884294	0.0859705	2.65806	3.33192	0.112643	0.06	95.6006	0.0609575	95.5397	4.68367	100.223
Asotin grade, WA	CPB-09-09	34.261	0.167	6.766	1.869	0.081	0	0.664	0.229	1.934	2.896	0.111638	0.063	51.0714	100.113		73.2911	0.278573	12.7844	2.67211	0.104587	0	0.929069	0.255679	2.60684	3.48852	0.111638	0.063	96.5855	0.0612108	96.5243	4.03108	100.555
Asotin grade, WA	CPB-09-09	34.022	0.072	6.704	1.8	0.063	0	0.607	0.143	1.795	2.569	0.0947192	0.063	51.1959	99.1287		72.7799	0.120103	12.6672	2.57346	0.0813456	0	0.849314	0.159659	2.41948	3.09462	0.0947192	0.063	94.9028	0.054087	94.8487	4.80879	99.6575
Asotin grade, WA	CPB-09-09	34.328	0.105	6.702	1.893	0.081	0	0.67	0.137	1.955	2.87	0.0799147	0.039	51.7633	100.623		73.4345	0.17515	12.6634	2.70642	0.104587	0	0.937464	0.152961	2.63514	3.4572	0.0799147	0.039	96.3857	0.042442	96.3433	4.8087	101.152
Asotin grade, WA	CPB-09-09	34.33	0.091	6.675	1.876	0.032	0	0.64	0.088	2.098	2.713	0.0624273	0.084	51.2343	99.9238		73.4387	0.151797	12.6124	2.68212	0.0413184	0	0.895488	0.098252	2.82789	3.26808	0.0624273	0.084	96.1625	0.0452254	96.1173	4.27604	100.393
Asotin grade, WA	CPB-09-09	34.028	0.096	6.788	1.868	0.092	0.012	0.599	0.066	1.893	2.54	0	0.058	51.7802	99.8202		72.7927	0.160138	12.8259	2.67068	0.11879	0.0198948	0.838121	0.073689	2.55157	3.05968	0	0.058	95.1692	0.0130778	95.1561	5.24091	100.397
Asotin grade, WA	CPB-09-09	34.306	0.038	6.82	1.903	0.046	0.028	0.675	0.122	1.844	2.627	0.0896131	0.07	51.0555	99.6241		73.3874	0.0633878	12.8864	2.72072	0.0593952	0.0464212	0.94446	0.136213	2.48553	3.16448	0.0896131	0.07	96.054	0.0535154	96.0005	4.07032	100.071
Asotin grade, WA	CPB-09-09	34.308	0.1	6.729	1.656	0.109	0.024	0.637	0.124	1.672	2.781	0.193062	0.042	51.7231	100.098		73.3917	0.16681	12.7144	2.36758	0.140741	0.0397896	0.89129	0.138446	2.25369	3.34999	0.193062	0.042	95.6895	0.0907592	95.5988	5.05557	100.654
Asotin grade, WA	CPB-09-09	33.971	0.096	6.694	1.905	0.014	0.009	0.652	0.137	1.7	2.736	0.156553	0.036	50.9993	99.1059		72.6708	0.160138	12.6483	2.72358	0.0180768	0.0149211	0.912278	0.152961	2.29143	3.29579	0.156553	0.036	95.0808	0.0740342	95.0068	4.6053	99.6121
Asotin grade, WA	CPB-09-09	34.784	0.115	6.798	1.942	0.037	0	0.621	0.094	2.035	2.758	0.157437	0.057	51.5648	100.963		74.4099	0.191831	12.8448	2.77648	0.0477744	0	0.868903	0.104951	2.74298	3.32229	0.157437	0.057	97.5244	0.0791416	97.4453	3.95147	101.397
Asotin grade, WA	CPB-09-09	34.03	0.096	6.753	1.836	0.055	0.015	0.581	0.143	1.714	2.59	0.0546336	0.078	51.1753	99.121		72.797	0.160138	12.7598	2.62493	0.071016	0.0248685	0.812935	0.159659	2.3103	3.11991	0.0546336	0.078	94.9732	0.040591	94.9326	4.70576	99.6383
Asotin grade, WA	CPB-09-09	33.909	0.124	6.947	1.714	0.032	0	0.663	0.212	2.433	2.959	0	0.087	50.2887	99.3687		72.5381	0.206844	13.1264	2.45051	0.0413184	0	0.92767	0.236698	3.27944	3.56441	0	0.087	96.4584	0.0196167	96.4388	3.28992	99.7287
Asotin grade, WA	CPB-09-10	34.559	0.048	6.616	1.901	0.032	0.02	0.672	0.041	2.028	3.056	0.0556734	0.055	51.7736	100.857		73.9286	0.0800688	12.5009	2.71786	0.0413184	0.033158	0.940262	0.0457765	2.73354	3.68126	0.0556734	0.055	96.8135	0.0358428	96.7776	4.58338	101.361
Asotin grade, WA	CPB-09-10	34.242	0.086	6.792	1.959	0	0.005	0.676	0.144	1.689	2.994	0.120924	0.032	51.268	100.008		73.2505	0.143457	12.8335	2.80078	0	0.0082895	0.945859	0.160776	2.2766	3.60657	0.120924	0.032	96.1792	0.0581309	96.1211	4.36644	100.488
Asotin grade, WA	CPB-09-10	33.95	0.1	6.924	1.8	0.072	0	0.595	0.148	1.742	2.865	0.117719	0.048	51.5049	99.8666		72.6258	0.16681	13.0829	2.57346	0.0929664	0	0.832524	0.165242	2.34804	3.45118	0.117719	0.048	95.5047	0.060389	95.4443	4.96893	100.413
Asotin grade, WA	CPB-09-10	34.224	0.124	6.812	1.923	0.086	0.018	0.658	0.148	1.803	3.254	0.11201	0.077	51.2961	100.535		73.212	0.206844	12.8713	2.74931	0.111043	0.0298422	0.920674	0.165242	2.43026	3.91977	0.11201	0.077	96.8053	0.064524	96.7407	4.26242	101.003
Asotin grade, WA	CPB-09-10	34.227	0.115	6.708	1.905	0.035	0.023	0.641	0.176	1.464	3.52	0.0175528	0.056	52.0264	100.914		73.2184	0.191831	12.6748	2.72358	0.045192	0.0381317	0.896887	0.196504	1.97333	4.24019	0.0175528	0.056	96.2724	0.0200175	96.2523	5.23805	101.49
Asotin grade, WA	CPB-09-10	34.369	0.134	6.732	1.802	0.127	0	0.563	0.086	2.166	2.818	-0.00434111	0.052	51.6285	100.473		73.5222	0.223525	12.7201	2.57632	0.163982	0	0.78775	0.096019	2.91955	3.39456	-0.00434111	0.052	96.4516	0.00989708	96.4418	4.52911	100.971
Asotin grade, WA	CPB-09-10	34.324	0.076	6.755	1.884	0.043	0.001	0.621	0.223	2.06	3.133	0.110186	0.019	51.0695	100.319		73.4259	0.126776	12.7636	2.69355	0.0555216	0.0016579	0.868903	0.24898	2.77667	3.77401	0.110186	0.019	96.8647	0.0506782	96.8141	3.93644	100.751
Asotin grade, WA	CPB-09-10	34.077	0.134	6.821	1.861	0.026	0.013	0.626	0.109	1.009	3.406	0.12888	0.056	52.121	100.388		72.8975	0.223525	12.8883	2.66067	0.0335712	0.0215527	0.875899	0.121699	1.36003	4.10287	0.12888	0.056	95.3705	0.066892	95.3036	5.71355	101.017
Asotin grade, WA	CPB-09-10	34.204	0.158	6.706	1.84	0.017	0.011	0.714	0.105	2.228	2.963	0.108513	0.045	51.5283	100.628		73.1692	0.26356	12.671	2.63065	0.0219504	0.0182369	0.999029	0.117233	3.00312	3.56923	0.108513	0.045	96.6167	0.0558362	96.5609	4.56912	101.13
Asotin grade, WA	CPB-09-10	34.232	0.076	6.915	1.801	0.04	0.017	0.63	0.118	1.945	2.81	0.143689	0.039	51.3682	100.135		73.2291	0.126776	13.0659	2.57489	0.051648	0.0281843	0.881496	0.131747	2.62167	3.38493	0.143689	0.039	96.279	0.0692943	96.2097	4.4096	100.619
Asotin grade, WA	CPB-09-10	34.073	0.067	6.686	1.918	0.043	0	0.627	0.146	1.561	3.086	0.138161	0.063	51.7109	100.119		72.889	0.111763	12.6332	2.74216	0.0555216	0	0.877298	0.163009	2.10407	3.7174	0.138161	0.063	95.4945	0.0723782	95.4222	5.27777	100.7
Asotin grade, WA	CPB-09-10	34.137	0.091	6.811	1.887	0.055	0	0.629	0.176	1.982	3.186	0	0.057	51.078	100.089		73.0259	0.151797	12.8694	2.69784	0.071016	0	0.880097	0.196504	2.67154	3.83786	0	0.057	96.4589	0.0128523	96.4461	4.09201	100.538
Asotin grade, WA	CPB-09-10	34.299	0.067	6.735	1.885	0.089	0	0.624	0.097	1.827	2.764	0.228156	0.013	51.2156	99.8438		73.3724	0.111763	12.7258	2.69498	0.114917	0	0.873101	0.108301	2.46261	3.32951	0.228156	0.013	96.0346	0.0989969	95.9356	4.39049	100.326
Asotin grade, WA	CPB-09-10	34.08	0.072	6.78	1.947	0.063	0	0.689	0.135	1.804	3.429	0.0182863	0.061	51.5574	100.636		72.9039	0.120103	12.8108	2.78363	0.0813456	0	0.964049	0.150728	2.43161	4.13057	0.0182863	0.061	96.4561	0.0214537	96.4346	4.71988	101.154
Asotin grade, WA	CPB-09-10	34.293	0.105	6.833	1.936	0.014	0.001	0.573	0.054	2.018	2.8	0.060618	0.091	51.6369	100.416		73.3596	0.17515	12.911	2.7679	0.0180768	0.0016579	0.801742	0.060291	2.72006	3.37288	0.060618	0.091	96.3399	0.046042	96.2939	4.63066	100.925
Asotin grade, WA	CPB-09-10	34.389	0.153	6.835	1.913	0.058	0	0.677	0.124	1.315	3.531	0.0593116	0.042	51.9815	101.078		73.5649	0.255219	12.9147	2.73502	0.0748896	0	0.947258	0.138446	1.77249	4.25344	0.0593116	0.042	96.7578	0.0344434	96.7233	4.89249	101.616
Asotin grade, WA	CPB-09-10	34.016	0.062	6.858	1.955	0.075	0.007	0.657	0.127	1.623	3.447	0.115045	0.064	52.018	101.024		72.767	0.103422	12.9582	2.79506	0.09684	0.0116053	0.919274	0.141796	2.18764	4.15226	0.115045	0.064	96.3122	0.0628707	96.2493	5.36534	101.615
Asotin grade, WA	CPB-09-10	34.541	0.157	6.665	1.804	0	0.012	0.648	0.148	1.796	2.826	0.0715986	0.053	51.165	99.8866		73.8901	0.261892	12.5935	2.57918	0	0.0198948	0.906682	0.165242	2.42083	3.4042	0.0715986	0.053	96.3661	0.0420972	96.324	4.00164	100.326
Asotin grade, WA	CPB-09-10	34.291	0.091	6.698	1.904	0.06	0	0.651	0.15	1.933	2.969	0.097583	0.057	51.4647	100.366		73.3553	0.151797	12.6559	2.72215	0.077472	0	0.910879	0.167475	2.60549	3.57646	0.097583	0.057	96.3775	0.0539399	96.3235	4.54178	100.865
Asotin grade, WA	CPB-09-10	34.279	0.153	6.821	1.917	0.072	0.011	0.613	0.174	1.956	2.746	0.143191	0.068	50.9422	99.8954		73.3296	0.255219	12.8883	2.74073	0.0929664	0.0182369	0.85771	0.194271	2.63649	3.30783	0.143191	0.068	96.5326	0.0756235	96.4569	3.86199	100.319
Asotin grade, WA	CPB-09-10	34.092	0.105	6.748	1.971	0.089	0.01	0.674	0.178	1.933	3.087	0.0715625	0.077	51.1173	100.153		72.9296	0.17515	12.7503	2.81794	0.114917	0.016579	0.943061	0.198737	2.60549	3.7186	0.0715625	0.077	96.419	0.0474935	96.3715	4.24777	100.619
Asotin grade, WA	CPB-09-10	34.422	0.119	6.742	2.004	0.049	0.006	0.637	0.097	1.576	3.368	0	0.056	52.003	101.079		73.6355	0.198504	12.739	2.86512	0.0632688	0.0099474	0.89129	0.108301	2.12429	4.05709	0	0.056	96.7484	0.0126268	96.7357	4.8799	101.616
Buffalo Canyon, NV	buf94-614	33.73	0.09	6.26	1.78	0.06	0	0.62	0.12	1.71	4.56	0.11	0.065	50.75	99.855		72.1552	0.150129	11.8283	2.54487	0.077472	0	0.867504	0.13398	2.30491	5.49298	0.11	0.065	95.7303	0.0609719	95.6694	4.70262	100.372
Buffalo Canyon, NV	buf94-614	33.59	0.1	6.29	1.8	0.01	0	0.55	0.15	1.62	4.66	0	0.051	51	99.821		71.8557	0.16681	11.885	2.57346	0.012912	0	0.76956	0.167475	2.1836	5.61344	0	0.051	95.2789	0.0114994	95.2674	5.11652	100.384
Buffalo Canyon, NV	buf94-614	34.12	0.09	6.31	1.82	0.07	0.011	0.6	0.15	2.53	3.65	0.17	0.051	50.4	99.972		72.9895	0.150129	11.9227	2.60205	0.090384	0.0182369	0.83952	0.167475	3.41019	4.39679	0.17	0.051	96.808	0.0830784	96.7249	3.64669	100.372
Buffalo Canyon, NV	buf94-614	33.99	0.11	6.31	1.82	0.04	0.004	0.6	0.13	1	4.71	0.08	0.043	51.27	100.107		72.7114	0.183491	11.9227	2.60205	0.051648	0.0066316	0.83952	0.145145	1.3479	5.67367	0.08	0.043	95.6072	0.0433798	95.5638	5.10476	100.669
Buffalo Canyon, NV	buf94-614	33.92	0.11	6.33	1.92	0.02	0	0.64	0.17	1.09	4.67	0.12	0.059	51.03	100.079		72.5617	0.183491	11.9605	2.74502	0.025824	0	0.895488	0.189805	1.46921	5.62548	0.12	0.059	95.8355	0.0638296	95.7717	4.8394	100.611
Buffalo Canyon, NV	buf94-614	33.89	0.1	6.34	1.84	0.09	0	0.63	0.14	2.16	4.2	0.11	0.043	51.03	100.573		72.4975	0.16681	11.9794	2.63065	0.116208	0	0.881496	0.15631	2.91146	5.05932	0.11	0.043	96.5522	0.0560114	96.4962	4.58019	101.076
Buffalo Canyon, NV	buf94-614	33.97	0.1	6.34	1.86	0.04	0.011	0.59	0.13	2.45	3.8	0.14	0.047	50.52	99.998		72.6686	0.16681	11.9794	2.65924	0.051648	0.0182369	0.825528	0.145145	3.30236	4.57748	0.14	0.047	96.5815	0.0695449	96.512	3.91557	100.428
Buffalo Canyon, NV	buf94-614	33.81	0.08	6.34	1.89	0.06	0	0.63	0.14	2.2	4.28	0.06	0.07	50.36	99.92		72.3264	0.133448	11.9794	2.70213	0.077472	0	0.881496	0.15631	2.96538	5.15569	0.06	0.07	96.5077	0.0410467	96.4667	3.87875	100.345
Buffalo Canyon, NV	buf94-614	33.71	0.09	6.35	1.85	0.07	0	0.62	0.15	1.94	4.5	0.19	0.052	50.86	100.382		72.1124	0.150129	11.9983	2.64494	0.090384	0	0.867504	0.167475	2.61493	5.4207	0.19	0.052	96.3088	0.0917249	96.2171	4.67927	100.896
Buffalo Canyon, NV	buf94-614	33.83	0.11	6.35	1.78	0.05	0.004	0.59	0.1	2.36	3.88	0.11	0.038	50.93	100.132		72.3691	0.183491	11.9983	2.54487	0.06456	0.0066316	0.825528	0.11165	3.18104	4.67385	0.11	0.038	96.1071	0.054884	96.0522	4.58358	100.636
Buffalo Canyon, NV	buf94-614	34.01	0.11	6.36	1.87	0.03	0	0.62	0.12	2.06	4.21	0.13	0.053	51.15	100.723		72.7542	0.183491	12.0172	2.67354	0.038736	0	0.867504	0.13398	2.77667	5.07137	0.13	0.053	96.6997	0.0666872	96.633	4.59496	101.228
Buffalo Canyon, NV	buf94-614	33.75	0.13	6.36	1.79	0.07	0.017	0.63	0.16	1.33	4.55	0.11	0.058	51.44	100.395		72.198	0.216853	12.0172	2.55916	0.090384	0.0281843	0.881496	0.17864	1.79271	5.48093	0.11	0.058	95.6116	0.0593936	95.5522	5.4419	100.994
Buffalo Canyon, NV	buf94-614	33.78	0.12	6.37	1.8	0.05	0.012	0.6	0.14	1.1	4.86	0.14	0.05	50.98	100.002		72.2622	0.200172	12.0361	2.57346	0.06456	0.0198948	0.83952	0.15631	1.48269	5.85436	0.14	0.05	95.6793	0.0702213	95.609	4.9358	100.545
Buffalo Canyon, NV	buf94-614	33.94	0.07	6.4	1.78	0.03	0.004	0.61	0.19	2.11	4.39	0	0.051	50.59	100.165		72.6044	0.116767	12.0928	2.54487	0.038736	0.0066316	0.853512	0.212135	2.84407	5.28819	0	0.051	96.6532	0.0114994	96.6417	3.95746	100.599
Buffalo Canyon, NV	buf94-614	34.14	0.11	6.42	1.89	0.06	0	0.61	0.11	2.87	3.37	0.19	0.06	50.77	100.6		73.0323	0.183491	12.1306	2.70213	0.077472	0	0.853512	0.122815	3.86847	4.0595	0.19	0.06	97.2803	0.0935287	97.1867	3.83368	101.02
Buffalo Canyon, NV	buf94-614	34.15	0.11	6.42	1.86	0.04	0.008	0.59	0.16	2.77	3.34	0.15	0.035	50.62	100.253		73.0537	0.183491	12.1306	2.65924	0.051648	0.0132632	0.825528	0.17864	3.73368	4.02336	0.15	0.035	97.0381	0.0710497	96.9671	3.69041	100.657
Buffalo Canyon, NV	buf94-614	33.96	0.07	6.43	1.9	0.05	0.009	0.48	0.1	1.48	3.52	0	0.047	50.21	98.256		72.6472	0.116767	12.1495	2.71643	0.06456	0.0149211	0.671616	0.11165	1.99489	4.24019	0	0.047	94.7747	0.0105975	94.7641	3.92211	98.6863
Buffalo Canyon, NV	buf94-614	33.81	0.1	6.44	1.85	0.09	0	0.64	0.08	1.02	4.8	0.1	0.042	51.44	100.412		72.3264	0.16681	12.1684	2.64494	0.116208	0	0.895488	0.08932	1.37486	5.78208	0.1	0.042	95.7064	0.0515754	95.6549	5.3455	101
Buffalo Canyon, NV	buf94-614	34.18	0.12	6.47	1.92	0.06	0.018	0.6	0.14	2.24	3.45	0.24	0.058	50.68	100.176		73.1179	0.200172	12.2251	2.74502	0.077472	0.0298422	0.83952	0.15631	3.0193	4.15587	0.24	0.058	96.8644	0.11413	96.7503	3.84765	100.598
Virgin Valley, NV	vvy95-64	33.2	0.12	6.35	1.78	0.04	0	0.63	0.09	1.31	5.02	0.18	0.05	51.39	100.16		71.0214	0.200172	11.9983	2.54487	0.051648	0	0.881496	0.100485	1.76575	6.04709	0.18	0.05	94.8413	0.0870634	94.7542	6.07532	100.83
Virgin Valley, NV	vvy95-64	32.9	0.09	6.33	1.79	0.08	0	0.6	0.16	1.61	5.14	0.16	0.06	50.99	99.91		70.3797	0.150129	11.9605	2.55916	0.103296	0	0.83952	0.17864	2.17012	6.19164	0.16	0.06	94.7527	0.0808972	94.6718	5.88677	100.559
Virgin Valley, NV	vvy95-64	33.05	0.12	6.32	1.82	0.06	0.01	0.61	0.16	1.56	5.11	0.15	0.06	51.08	100.11		70.7006	0.200172	11.9416	2.60205	0.077472	0.016579	0.853512	0.17864	2.10272	6.15551	0.15	0.06	95.0389	0.0766866	94.9622	5.78511	100.747
Virgin Valley, NV	vvy95-64	33.21	0.09	6.35	1.82	0.04	0	0.62	0.14	1.73	5.14	0.18	0.03	50.91	100.26		71.0428	0.150129	11.9983	2.60205	0.051648	0	0.867504	0.15631	2.33187	6.19164	0.18	0.03	95.6023	0.0825538	95.5198	5.32655	100.846
Virgin Valley, NV	vvy95-64	33.17	0.1	6.37	1.83	0.03	0	0.61	0.15	1.33	5.02	0.15	0.05	51.37	100.18		70.9573	0.16681	12.0361	2.61635	0.038736	0	0.853512	0.167475	1.79271	6.04709	0.15	0.05	94.8761	0.0744319	94.8016	6.04446	100.846
Virgin Valley, NV	vvy95-64	33.06	0.12	6.38	1.83	0.05	0.01	0.6	0.11	1.68	5.22	0.15	0.05	51.55	100.81		70.722	0.200172	12.055	2.61635	0.06456	0.016579	0.83952	0.122815	2.26447	6.28801	0.15	0.05	95.3894	0.0744319	95.315	6.17567	101.491
Virgin Valley, NV	vvy95-64	33.04	0.12	6.4	1.83	0.04	0	0.6	0.12	2.15	4.67	0.2	0.07	50.82	100.06		70.6792	0.200172	12.0928	2.61635	0.051648	0	0.83952	0.13398	2.89799	5.62548	0.2	0.07	95.4071	0.0999941	95.3071	5.34085	100.648
Virgin Valley, NV	vvy95-64	32.85	0.13	6.33	1.83	0.07	0	0.63	0.15	1.55	5.21	0.16	0.04	51.34	100.29		70.2727	0.216853	11.9605	2.61635	0.090384	0	0.881496	0.167475	2.08925	6.27597	0.16	0.04	94.771	0.0763876	94.6946	6.28862	100.983
Virgin Valley, NV	vvy95-64	33.14	0.06	6.32	1.84	0.06	0	0.61	0.09	1.43	5.03	0.18	0.07	50.9	99.73		70.8931	0.100086	11.9416	2.63065	0.077472	0	0.853512	0.100485	1.9275	6.05914	0.18	0.07	94.8336	0.091573	94.742	5.60532	100.347
Virgin Valley, NV	vvy95-64	32.83	0.13	6.33	1.85	0.08	0	0.63	0.15	0.94	4.77	0.2	0.07	51.82	99.8		70.2299	0.216853	11.9605	2.64494	0.103296	0	0.881496	0.167475	1.26703	5.74594	0.2	0.07	93.4875	0.0999941	93.3875	7.20791	100.595
Virgin Valley, NV	vvy95-64	33.24	0.1	6.41	1.85	0.05	0.01	0.64	0.11	1.07	4.92	0.14	0.05	51.89	100.48		71.107	0.16681	12.1117	2.64494	0.06456	0.016579	0.895488	0.122815	1.44225	5.92663	0.14	0.05	94.6888	0.0702213	94.6186	6.58791	101.206
Virgin Valley, NV	vvy95-64	33.15	0.08	6.43	1.86	0.07	0	0.62	0.1	1.38	4.96	0.17	0.05	51.25	100.12		70.9145	0.133448	12.1495	2.65924	0.090384	0	0.867504	0.11165	1.8601	5.97482	0.17	0.05	94.9811	0.0828529	94.8983	5.86827	100.767
Virgin Valley, NV	vvy95-64	33.39	0.1	6.45	1.86	0.06	0.01	0.63	0.16	1.14	4.87	0.13	0.05	51.41	100.26		71.4279	0.16681	12.1873	2.65924	0.077472	0.016579	0.881496	0.17864	1.53661	5.8664	0.13	0.05	95.1784	0.0660108	95.1124	5.7848	100.897
Virgin Valley, NV	vvy95-64	33.25	0.11	6.36	1.87	0.08	0	0.63	0.16	1.2	4.84	0.14	0.05	51.01	99.7		71.1284	0.183491	12.0172	2.67354	0.103296	0	0.881496	0.17864	1.61748	5.83026	0.14	0.05	94.8038	0.0702213	94.7336	5.58098	100.315
Virgin Valley, NV	vvy95-64	33.25	0.09	6.41	1.87	0.08	0.01	0.59	0.13	1.6	5.18	0.18	0.06	50.87	100.32		71.1284	0.150129	12.1117	2.67354	0.103296	0.016579	0.825528	0.145145	2.15664	6.23983	0.18	0.06	95.7908	0.0893182	95.7015	5.18962	100.891
Virgin Valley, NV	vvy95-64	33.36	0.09	6.39	1.87	0.02	0.01	0.62	0.1	0.89	4.77	0.11	0.05	52.28	100.56		71.3637	0.150129	12.0739	2.67354	0.025824	0.016579	0.867504	0.11165	1.19963	5.74594	0.11	0.05	94.3884	0.0575897	94.3308	7.0016	101.332
Virgin Valley, NV	vvy95-64	33.19	0.07	6.39	1.88	0.06	0	0.62	0.12	1.66	5.17	0.15	0.06	50.91	100.28		71	0.116767	12.0739	2.68784	0.077472	0	0.867504	0.13398	2.23751	6.22778	0.15	0.06	95.6328	0.0766866	95.5561	5.30815	100.864
Virgin Valley, NV	vvy95-64	33	0.08	6.35	1.89	0.05	0	0.6	0.16	1.93	5.15	0.18	0.06	51.01	100.46		70.5936	0.133448	11.9983	2.70213	0.06456	0	0.83952	0.17864	2.60145	6.20369	0.18	0.06	95.5554	0.0893182	95.466	5.612	101.078
Virgin Valley, NV	vvy95-64	33.53	0.1	6.41	1.91	0.04	0	0.64	0.09	0.96	4.89	0.11	0.04	51.69	100.41		71.7274	0.16681	12.1117	2.73073	0.051648	0	0.895488	0.100485	1.29398	5.89049	0.11	0.04	95.1187	0.055335	95.0634	6.00871	101.072
Virgin Valley, NV	vvy95-64	33.4	0.1	6.44	1.93	0.06	0	0.63	0.18	1.29	4.98	0.2	0.03	51.47	100.71		71.4493	0.16681	12.1684	2.75932	0.077472	0	0.881496	0.20097	1.73879	5.99891	0.2	0.03	95.6714	0.0909749	95.5805	5.76447	101.345
Virgin Valley, NV	vvy95-64	33.14	0.08	6.33	1.95	0.05	0	0.64	0.12	1.32	5.08	0.19	0.06	51.18	100.14		70.8931	0.133448	11.9605	2.78791	0.06456	0	0.895488	0.13398	1.77923	6.11937	0.19	0.06	95.0176	0.0935287	94.9241	5.8617	100.786
White Bird 28
Latah Fm, White Bird, ID	cpb00-28	33.74	0.1	6.28	1.36	0.01	0.02	0.75	0.11	1.95	3.44	0.11	0.04	52.03	99.94		72.1766	0.16681	11.8661	1.94439	0.012912	0.033158	1.0494	0.122815	2.62841	4.14382	0.11	0.04	94.2944	0.055335	94.239	6.40744	100.646
Latah Fm, White Bird, ID	cpb00-28	33.84	0.1	6.29	1.38	0.02	0.03	0.72	0.19	1.64	3.67	0.21	0.05	52.54	100.68		72.3905	0.16681	11.885	1.97299	0.025824	0.049737	1.00742	0.212135	2.21056	4.42088	0.21	0.05	94.6018	0.099695	94.5021	6.9439	101.446
Latah Fm, White Bird, ID	cpb00-28	33.69	0.13	6.26	1.38	0.03	0.03	0.77	0.1	1.55	3.75	0.16	0.03	52.15	100.03		72.0696	0.216853	11.8283	1.97299	0.038736	0.049737	1.07738	0.11165	2.08925	4.51725	0.16	0.03	94.1618	0.0741328	94.0876	6.67903	100.767
Latah Fm, White Bird, ID	cpb00-28	33.83	0.07	6.22	1.38	0.02	0.02	0.73	0.1	1.09	3.91	0.12	0.04	52.53	100.06		72.3691	0.116767	11.7527	1.97299	0.025824	0.033158	1.02142	0.11165	1.46921	4.70999	0.12	0.04	93.7428	0.0595455	93.6833	7.16763	100.851
Latah Fm, White Bird, ID	cpb00-28	33.96	0.09	6.3	1.38	0.03	0.04	0.73	0.12	1.97	3.83	0.16	0.04	51.98	100.63		72.6472	0.150129	11.9039	1.97299	0.038736	0.066316	1.02142	0.13398	2.65536	4.61362	0.16	0.04	95.4036	0.0763876	95.3272	5.95941	101.287
Latah Fm, White Bird, ID	cpb00-28	33.77	0.09	6.19	1.39	0.04	0.02	0.73	0.12	0.91	4.6	0.13	0.03	52.27	100.29		72.2408	0.150129	11.696	1.98728	0.051648	0.033158	1.02142	0.13398	1.22659	5.54116	0.13	0.03	94.2422	0.0615012	94.1807	6.8668	101.047
Latah Fm, White Bird, ID	cpb00-28	33.94	0.07	6.24	1.39	0.05	0.03	0.74	0.11	1.55	3.93	0.12	0.04	52.12	100.33		72.6044	0.116767	11.7905	1.98728	0.06456	0.049737	1.03541	0.122815	2.08925	4.73408	0.12	0.04	94.7548	0.0595455	94.6953	6.33287	101.028
Latah Fm, White Bird, ID	cpb00-28	33.85	0.08	6.27	1.39	0.05	0.04	0.73	0.16	1.16	3.95	0.14	0.03	52.14	99.99		72.4119	0.133448	11.8472	1.98728	0.06456	0.066316	1.02142	0.17864	1.56356	4.75817	0.14	0.03	94.2025	0.0657117	94.1368	6.57867	100.715
Latah Fm, White Bird, ID	cpb00-28	33.69	0.1	6.22	1.4	0.02	0.03	0.72	0.12	1.14	3.83	0.15	0.05	52.19	99.66		72.0696	0.16681	11.7527	2.00158	0.025824	0.049737	1.00742	0.13398	1.53661	4.61362	0.15	0.05	93.5579	0.0744319	93.4835	6.94242	100.426
Latah Fm, White Bird, ID	cpb00-28	33.68	0.08	6.15	1.4	0.03	0.02	0.72	0.17	1.17	4.14	0.19	0.05	52.14	99.94		72.0483	0.133448	11.6204	2.00158	0.038736	0.033158	1.00742	0.189805	1.57704	4.98704	0.19	0.05	93.8769	0.091274	93.7856	6.91746	100.703
Latah Fm, White Bird, ID	cpb00-28	33.86	0.09	6.22	1.4	0.02	0.02	0.72	0.1	1.9	3.8	0.1	0.05	51.78	100.06		72.4333	0.150129	11.7527	2.00158	0.025824	0.033158	1.00742	0.11165	2.56101	4.57748	0.1	0.05	94.8043	0.0533792	94.7509	5.96659	100.717
Latah Fm, White Bird, ID	cpb00-28	33.86	0.08	6.17	1.41	0.02	0.02	0.71	0.12	1.03	4.21	0.15	0.04	52.34	100.16		72.4333	0.133448	11.6582	2.01588	0.025824	0.033158	0.993432	0.13398	1.38834	5.07137	0.15	0.04	94.0769	0.0721771	94.0048	6.91842	100.923
Latah Fm, White Bird, ID	cpb00-28	33.59	0.11	6.25	1.41	0.05	0.02	0.74	0.19	0.82	4.17	0.12	0.04	52.59	100.1		71.8557	0.183491	11.8094	2.01588	0.06456	0.033158	1.03541	0.212135	1.10528	5.02318	0.12	0.04	93.4982	0.0595455	93.4386	7.48783	100.926
Latah Fm, White Bird, ID	cpb00-28	33.56	0.11	6.18	1.42	0.01	0.02	0.71	0.15	1.65	3.89	0.05	0.04	51.85	99.64		71.7916	0.183491	11.6771	2.03017	0.012912	0.033158	0.993432	0.167475	2.22404	4.68589	0.05	0.04	93.8892	0.0300718	93.8592	6.4973	100.356
Latah Fm, White Bird, ID	cpb00-28	33.87	0.08	6.23	1.42	0.02	0.04	0.76	0.15	1.22	3.79	0.09	0.05	52.59	100.31		72.4547	0.133448	11.7716	2.03017	0.025824	0.066316	1.06339	0.167475	1.64444	4.56543	0.09	0.05	94.0628	0.0491687	94.0136	7.07723	101.091
Latah Fm, White Bird, ID	cpb00-28	33.77	0.1	6.17	1.43	0.03	0.02	0.75	0.16	1.41	3.77	0.12	0.04	52.52	100.29		72.2408	0.16681	11.6582	2.04447	0.038736	0.033158	1.0494	0.17864	1.90054	4.54134	0.12	0.04	94.0121	0.0595455	93.9525	7.12346	101.076
Latah Fm, White Bird, ID	cpb00-28	33.67	0.08	6.21	1.45	0	0.02	0.72	0.08	0.88	4.2	0.13	0.05	52.51	100		72.0269	0.133448	11.7338	2.07306	0	0.033158	1.00742	0.08932	1.18615	5.05932	0.13	0.05	93.5225	0.0660108	93.4565	7.35522	100.812
Latah Fm, White Bird, ID	cpb00-28	34.07	0.05	6.27	1.45	0.01	0.02	0.73	0.12	1.68	3.33	0.16	0.05	52.55	100.49		72.8825	0.083405	11.8472	2.07306	0.012912	0.033158	1.02142	0.13398	2.26447	4.01132	0.16	0.05	94.5734	0.0786424	94.4948	6.73842	101.233
Latah Fm, White Bird, ID	cpb00-28	33.59	0.08	6.23	1.47	0.04	0.01	0.7	0.13	1.95	3.94	0.13	0.06	52.11	100.44		71.8557	0.133448	11.7716	2.10166	0.051648	0.016579	0.97944	0.145145	2.62841	4.74612	0.13	0.06	94.6198	0.0682656	94.5515	6.61842	101.17
Latah Fm, White Bird, ID	cpb00-28	34.01	0.06	6.2	1.47	0.03	0.03	0.75	0.13	1.15	3.86	0.13	0.05	52.34	100.21		72.7542	0.100086	11.7149	2.10166	0.038736	0.049737	1.0494	0.145145	1.55008	4.64976	0.13	0.05	94.3337	0.0660108	94.2677	6.67889	100.947
Latah Fm, White Bird, ID	cpb00-28	33.89	0.05	6.33	1.48	0.03	0.02	0.74	0.15	1.95	3.6	0.18	0.05	52.01	100.48		72.4975	0.083405	11.9605	2.11596	0.038736	0.033158	1.03541	0.167475	2.62841	4.33656	0.18	0.05	95.1271	0.0870634	95.0401	6.11374	101.154
Latah Fm, White Bird, ID	cpb00-28	33.6	0.07	6.13	1.49	0.02	0.02	0.72	0.16	1.09	4.33	0.18	0.05	52.35	100.21		71.8771	0.116767	11.5826	2.13025	0.025824	0.033158	1.00742	0.17864	1.46921	5.21592	0.18	0.05	93.867	0.0870634	93.7799	7.22769	101.008
Bully Creek Fm, OR	har94-21	33.87	0.05	6.21	1.38	0.01	0.04	0.74	0.13	2.51	3.14	0.19	0.05	50.7	99.02		72.4547	0.083405	11.7338	1.97299	0.012912	0.066316	1.03541	0.145145	3.38323	3.78244	0.19	0.05	94.9103	0.091274	94.8191	4.71991	99.539
Bully Creek Fm, OR	har94-21	33.96	0.1	6.26	1.39	0.02	0.04	0.71	0.13	2.22	3.48	0.18	0.04	50.97	99.5		72.6472	0.16681	11.8283	1.98728	0.025824	0.066316	0.993432	0.145145	2.99234	4.19201	0.18	0.04	95.2647	0.0848086	95.1798	4.85399	100.034
Bully Creek Fm, OR	har94-21	34.31	0.1	6.23	1.4	0	0.02	0.76	0.12	2.42	3.2	0.21	0.05	50.91	99.73		73.396	0.16681	11.7716	2.00158	0	0.033158	1.06339	0.13398	3.26192	3.85472	0.21	0.05	95.9431	0.099695	95.8434	4.36622	100.21
Bully Creek Fm, OR	har94-21	33.98	0.11	6.18	1.4	0	0.03	0.76	0.1	2.49	3.24	0.14	0.05	50.59	99.07		72.69	0.183491	11.6771	2.00158	0	0.049737	1.06339	0.11165	3.35627	3.9029	0.14	0.05	95.2262	0.0702213	95.1559	4.39719	99.5531
Bully Creek Fm, OR	har94-21	33.66	0.08	6.23	1.41	0.05	0.03	0.75	0.13	2.05	3.76	0.13	0.04	50.6	98.92		72.0055	0.133448	11.7716	2.01588	0.06456	0.049737	1.0494	0.145145	2.7632	4.5293	0.13	0.04	94.6977	0.063756	94.634	4.81565	99.4496
Bully Creek Fm, OR	har94-21	33.81	0.05	6.24	1.42	0.02	0.03	0.76	0.11	1.85	4.2	0.22	0.03	50.29	99.03		72.3264	0.083405	11.7905	2.03017	0.025824	0.049737	1.06339	0.122815	2.49362	5.05932	0.22	0.03	95.2951	0.099396	95.1957	4.30737	99.5031
Bully Creek Fm, OR	har94-21	33.89	0.1	6.28	1.42	0.04	0.03	0.75	0.11	2.62	3.26	0.2	0.03	50.73	99.46		72.4975	0.16681	11.8661	2.03017	0.051648	0.049737	1.0494	0.122815	3.5315	3.927	0.2	0.03	95.5226	0.0909749	95.4317	4.52575	99.9574
Bully Creek Fm, OR	har94-21	34.15	0.13	6.2	1.42	0.04	0.03	0.77	0.15	2.21	3.81	0.15	0.03	50.43	99.52		73.0537	0.216853	11.7149	2.03017	0.051648	0.049737	1.07738	0.167475	2.97886	4.58953	0.15	0.03	96.1102	0.0699223	96.0403	3.90842	99.9487
Bully Creek Fm, OR	har94-21	33.85	0.08	6.23	1.42	0.01	0.02	0.74	0.12	2.3	3.48	0.18	0.04	50.73	99.2		72.4119	0.133448	11.7716	2.03017	0.012912	0.033158	1.03541	0.13398	3.10017	4.19201	0.18	0.04	95.0748	0.0848086	94.99	4.73015	99.7201
Bully Creek Fm, OR	har94-21	33.84	0.13	6.17	1.43	0.02	0.03	0.77	0.14	1.88	3.87	0.16	0.04	51.03	99.51		72.3905	0.216853	11.6582	2.04447	0.025824	0.049737	1.07738	0.15631	2.53405	4.6618	0.16	0.04	95.0152	0.0763876	94.9388	5.13643	100.075
Bully Creek Fm, OR	har94-21	34.14	0.07	6.27	1.43	0.01	0.02	0.74	0.09	2.31	3.35	0.12	0.04	50.96	99.55		73.0323	0.116767	11.8472	2.04447	0.012912	0.033158	1.03541	0.100485	3.11365	4.03541	0.12	0.04	95.5317	0.0595455	95.4722	4.58138	100.054
Bully Creek Fm, OR	har94-21	34.09	0.09	6.27	1.43	0	0.03	0.73	0.13	2.37	3.07	0.17	0.04	51.08	99.5		72.9253	0.150129	11.8472	2.04447	0	0.049737	1.02142	0.145145	3.19452	3.69812	0.17	0.04	95.286	0.0805981	95.2054	4.82521	100.031
Bully Creek Fm, OR	har94-21	33.93	0.07	6.27	1.44	0.02	0.03	0.76	0.14	1.92	3.8	0.2	0.05	50.5	99.13		72.5831	0.116767	11.8472	2.05877	0.025824	0.049737	1.06339	0.15631	2.58797	4.57748	0.2	0.05	95.3165	0.0954845	95.221	4.39144	99.6124
Bully Creek Fm, OR	har94-21	34.23	0.06	6.23	1.44	0.01	0.03	0.76	0.09	2.15	3.91	0.16	0.04	50.77	99.88		73.2248	0.100086	11.7716	2.05877	0.012912	0.049737	1.06339	0.100485	2.89799	4.70999	0.16	0.04	96.1898	0.0763876	96.1134	4.23123	100.345
Bully Creek Fm, OR	har94-21	33.9	0.09	6.24	1.44	0.03	0.03	0.75	0.16	2.28	3.26	0.19	0.04	51.13	99.54		72.5189	0.150129	11.7905	2.05877	0.038736	0.049737	1.0494	0.17864	3.07321	3.927	0.19	0.04	95.065	0.0890192	94.976	5.12839	100.104
Bully Creek Fm, OR	har94-21	33.87	0.08	6.16	1.45	0.03	0.02	0.76	0.09	2.14	3.71	0.18	0.05	50.81	99.35		72.4547	0.133448	11.6393	2.07306	0.038736	0.033158	1.06339	0.100485	2.88451	4.46907	0.18	0.05	95.1199	0.0870634	95.0328	4.85067	99.8835
Bully Creek Fm, OR	har94-21	34.21	0.09	6.24	1.45	0.05	0.02	0.73	0.19	2.2	3.8	0.14	0.04	51.46	100.62		73.182	0.150129	11.7905	2.07306	0.06456	0.033158	1.02142	0.212135	2.96538	4.57748	0.14	0.04	96.2498	0.0679665	96.1819	4.98664	101.169
Bully Creek Fm, OR	har94-21	34.2	0.08	6.33	1.45	0.03	0.03	0.75	0.14	2.59	3.05	0.18	0.03	51.37	100.23		73.1606	0.133448	11.9605	2.07306	0.038736	0.049737	1.0494	0.15631	3.49106	3.67403	0.18	0.03	95.997	0.0825538	95.9144	4.84885	100.763
Bully Creek Fm, OR	har94-21	34.14	0.08	6.28	1.48	0.04	0.03	0.76	0.16	2.42	3.25	0.2	0.06	50.88	99.78		73.0323	0.133448	11.8661	2.11596	0.051648	0.049737	1.06339	0.17864	3.26192	3.91495	0.2	0.06	95.928	0.0977393	95.8303	4.43721	100.268
Bully Creek Fm, OR	har94-21	34.07	0.07	6.26	1.48	0.02	0.02	0.78	0.11	2.49	2.95	0.2	0.05	50.84	99.34		72.8825	0.116767	11.8283	2.11596	0.025824	0.033158	1.09138	0.122815	3.35627	3.55357	0.2	0.05	95.3766	0.0954845	95.2811	4.56015	99.8412
White Bird 29, 30
Latah Fm, White Bird, ID	cpb00-29	33.56	0.17	6.14	1.4	0.05	0.03	0.39	0.01	1.15	5.57	0.16	0.04	51.6	100.27		71.7916	0.283577	11.6015	2.00158	0.06456	0.049737	0.545688	0.011165	1.55008	6.70962	0.16	0.04	94.8091	0.0763876	94.7327	6.22324	100.956
Latah Fm, White Bird, ID	cpb00-29	33.37	0.15	6.07	1.41	0.03	0.04	0.4	0.06	1.37	5.58	0.12	0.03	51.44	100.07		71.3851	0.250215	11.4693	2.01588	0.038736	0.066316	0.55968	0.06699	1.84662	6.72167	0.12	0.03	94.5705	0.0572907	94.5132	6.24522	100.758
Latah Fm, White Bird, ID	cpb00-29	33.29	0.09	6.11	1.44	0.04	0.04	0.4	0.02	1.65	5.56	0.19	0.05	51.19	100.07		71.214	0.150129	11.5448	2.05877	0.051648	0.066316	0.55968	0.02233	2.22404	6.69758	0.19	0.05	94.8293	0.091274	94.738	5.9923	100.73
Latah Fm, White Bird, ID	cpb00-29	33.57	0.14	6	1.44	0.01	0.04	0.41	0.01	0.76	5.18	0.17	0.05	52.23	100.01		71.8129	0.233534	11.337	2.05877	0.012912	0.066316	0.573672	0.011165	1.0244	6.23983	0.17	0.05	93.5905	0.0828529	93.5077	7.30891	100.817
Latah Fm, White Bird, ID	cpb00-29	33.25	0.14	6.17	1.59	0.03	0.05	0.46	0.03	0.63	4.82	0.09	0.05	52.48	99.79		71.1284	0.233534	11.6582	2.27322	0.038736	0.082895	0.643632	0.033495	0.849177	5.80617	0.09	0.05	92.8875	0.0491687	92.8383	7.8145	100.653
Latah Fm, White Bird, ID	cpb00-29	33.11	0.14	6.15	1.62	0.05	0.06	0.47	0.05	0.74	5.01	0.14	0.04	52.16	99.74		70.8289	0.233534	11.6204	2.31611	0.06456	0.099474	0.657624	0.055825	0.997446	6.03505	0.14	0.04	93.089	0.0679665	93.021	7.55274	100.574
Latah Fm, White Bird, ID	cpb00-29	32.98	0.16	6.21	1.64	0.04	0.07	0.47	0.02	1.44	5.81	0.18	0.03	50.91	99.96		70.5508	0.266896	11.7338	2.34471	0.051648	0.116053	0.657624	0.02233	1.94098	6.99873	0.18	0.03	94.8936	0.0825538	94.811	5.78643	100.597
Latah Fm, White Bird, ID	cpb00-29	33.39	0.14	6.26	1.66	0.04	0.04	0.48	0.06	0.68	4.77	0.13	0.05	52.6	100.3		71.4279	0.233534	11.8283	2.3733	0.051648	0.066316	0.671616	0.06699	0.916572	5.74594	0.13	0.05	93.5621	0.0660108	93.4961	7.64824	101.144
Latah Fm, White Bird, ID	cpb00-29	33.15	0.14	6.13	1.66	0.03	0.07	0.48	0.11	0.86	5.36	0.13	0.04	51.43	99.59		70.9145	0.233534	11.5826	2.3733	0.038736	0.116053	0.671616	0.122815	1.15919	6.45666	0.13	0.04	93.839	0.063756	93.7753	6.53538	100.311
Latah Fm, White Bird, ID	cpb00-29	33.05	0.13	6.19	1.66	0.04	0.05	0.46	0.03	1.46	5.9	0.15	0.05	51.12	100.29		70.7006	0.216853	11.696	2.3733	0.051648	0.082895	0.643632	0.033495	1.96793	7.10714	0.15	0.05	95.0735	0.0744319	94.999	5.94615	100.945
Latah Fm, White Bird, ID	cpb00-29	33.01	0.18	6.27	1.67	0.01	0.04	0.46	0	1.32	5.95	0.22	0.05	51.49	100.67		70.615	0.300258	11.8472	2.3876	0.012912	0.066316	0.643632	0	1.77923	7.16737	0.22	0.05	95.0895	0.103906	94.9856	6.3888	101.374
Latah Fm, White Bird, ID	cpb00-29	33.22	0.15	6.24	1.68	0.01	0.05	0.46	0.07	0.64	4.6	0.12	0.04	52.62	99.9		71.0642	0.250215	11.7905	2.4019	0.012912	0.082895	0.643632	0.078155	0.862656	5.54116	0.12	0.04	92.8882	0.0595455	92.8287	7.94908	100.778
Latah Fm, White Bird, ID	cpb00-29	32.74	0.16	6.3	1.71	0.03	0.06	0.5	0.06	1.32	5.44	0.15	0.03	51.48	99.98		70.0374	0.266896	11.9039	2.44479	0.038736	0.099474	0.6996	0.06699	1.77923	6.55302	0.15	0.03	94.07	0.0699223	94.0001	6.72128	100.721
Latah Fm, White Bird, ID	cpb00-29	32.94	0.14	6.32	1.78	0.05	0.04	0.48	0.08	1.13	5.94	0.22	0.04	51.24	100.4		70.4652	0.233534	11.9416	2.54487	0.06456	0.066316	0.671616	0.08932	1.52313	7.15532	0.22	0.04	95.0156	0.101651	94.9139	6.16565	101.08
Latah Fm, White Bird, ID	cpb00-29	32.93	0.19	6.26	1.8	0.02	0.05	0.5	0.06	1.51	5.69	0.15	0.05	51.19	100.4		70.4439	0.316939	11.8283	2.57346	0.025824	0.082895	0.6996	0.06699	2.03533	6.85417	0.15	0.05	95.1273	0.0744319	95.0529	6.0093	101.062
Latah Fm, White Bird, ID	cpb00-29	32.83	0.19	6.32	1.83	0.02	0.08	0.5	0.05	0.76	5.38	0.13	0.04	51.94	100.07		70.2299	0.316939	11.9416	2.61635	0.025824	0.132632	0.6996	0.055825	1.0244	6.48075	0.13	0.04	93.6939	0.063756	93.6301	7.23868	100.869
Latah Fm, White Bird, ID	cpb00-29	32.96	0.14	6.28	1.83	0.06	0.06	0.49	0.03	0.76	4.83	0.18	0.04	52.16	99.82		70.508	0.233534	11.8661	2.61635	0.077472	0.099474	0.685608	0.033495	1.0244	5.81822	0.18	0.04	93.1826	0.0848086	93.0978	7.5563	100.654
Latah Fm, White Bird, ID	cpb00-29	33.01	0.19	6.38	1.84	0.03	0.06	0.53	0.07	1.98	5.22	0.17	0.05	51.16	100.69		70.615	0.316939	12.055	2.63065	0.038736	0.099474	0.741576	0.078155	2.66884	6.28801	0.17	0.05	95.7524	0.0828529	95.6695	5.64185	101.311
Latah Fm, White Bird, ID	cpb00-29	32.85	0.14	6.39	1.84	0.06	0.05	0.52	0.07	2.01	5.36	0.13	0.04	50.98	100.44		70.2727	0.233534	12.0739	2.63065	0.077472	0.082895	0.727584	0.078155	2.70928	6.45666	0.13	0.04	95.5128	0.063756	95.4491	5.60861	101.058
Latah Fm, White Bird, ID	cpb00-29	32.93	0.16	6.33	1.86	0.02	0.07	0.52	0.03	0.78	5.25	0.18	0.05	52.02	100.2		70.4439	0.266896	11.9605	2.65924	0.025824	0.116053	0.727584	0.033495	1.05136	6.32415	0.18	0.05	93.839	0.0870634	93.7519	7.24791	101
Latah Fm, White Bird, ID	cpb00-30	33.59	0.16	6.1	1.44	0.04	0.04	0.41	0	0.93	5.56	0.18	0.04	52.04	100.53		71.8557	0.266896	11.5259	2.05877	0.051648	0.066316	0.573672	0	1.25355	6.69758	0.18	0.04	94.5701	0.0848086	94.4853	6.79408	101.279
Latah Fm, White Bird, ID	cpb00-30	33.5	0.12	6.11	1.45	0.05	0.03	0.4	0.08	1.11	5.65	0.25	0.04	51.7	100.49		71.6632	0.200172	11.5448	2.07306	0.06456	0.049737	0.55968	0.08932	1.49617	6.80599	0.25	0.04	94.8367	0.114282	94.7225	6.48225	101.205
Latah Fm, White Bird, ID	cpb00-30	33.51	0.1	6.08	1.46	0	0.04	0.41	0.06	1.5	5.63	0.19	0.05	51.14	100.17		71.6846	0.16681	11.4882	2.08736	0	0.066316	0.573672	0.06699	2.02185	6.7819	0.19	0.05	95.1776	0.091274	95.0864	5.71285	100.799
Latah Fm, White Bird, ID	cpb00-30	33.72	0.13	6.13	1.46	0.02	0.03	0.41	0.01	0.65	5	0.17	0.05	51.94	99.72		72.1338	0.216853	11.5826	2.08736	0.025824	0.049737	0.573672	0.011165	0.876135	6.023	0.17	0.05	93.8002	0.0828529	93.7174	6.74677	100.464
Latah Fm, White Bird, ID	cpb00-30	33.85	0.16	6.15	1.48	0.04	0.04	0.42	0.02	0.54	4.33	0.1	0.05	52.53	99.71		72.4119	0.266896	11.6204	2.11596	0.051648	0.066316	0.587664	0.02233	0.727866	5.21592	0.1	0.05	93.2369	0.0533792	93.1836	7.33605	100.52
Latah Fm, White Bird, ID	cpb00-30	33.79	0.09	6.08	1.49	0.04	0.03	0.41	0	0.77	4.99	0.17	0.04	51.92	99.82		72.2836	0.150129	11.4882	2.13025	0.051648	0.049737	0.573672	0	1.03788	6.01095	0.17	0.04	93.986	0.0805981	93.9054	6.6477	100.553
Latah Fm, White Bird, ID	cpb00-30	33.63	0.14	6.09	1.51	0.01	0.03	0.41	0	0.66	4.97	0.16	0.05	52.17	99.83		71.9413	0.233534	11.5071	2.15885	0.012912	0.049737	0.573672	0	0.889614	5.98686	0.16	0.05	93.5635	0.0786424	93.4849	7.13206	100.617
Latah Fm, White Bird, ID	cpb00-30	33.57	0.15	6.05	1.52	0	0.04	0.39	0.07	1.36	5.9	0.21	0.04	51.3	100.6		71.8129	0.250215	11.4315	2.17314	0	0.066316	0.545688	0.078155	1.83314	7.10714	0.21	0.04	95.5482	0.0974402	95.4508	5.78661	101.237
Latah Fm, White Bird, ID	cpb00-30	33.38	0.14	6.27	1.62	0.05	0.04	0.49	0.05	0.96	5.09	0.16	0.05	52.11	100.41		71.4065	0.233534	11.8472	2.31611	0.06456	0.066316	0.685608	0.055825	1.29398	6.13141	0.16	0.05	94.311	0.0786424	94.2324	6.94363	101.176
Latah Fm, White Bird, ID	cpb00-30	33.26	0.16	6.2	1.63	0.02	0.05	0.47	0.04	0.57	4.62	0.11	0.05	52.56	99.74		71.1498	0.266896	11.7149	2.33041	0.025824	0.082895	0.657624	0.04466	0.768303	5.56525	0.11	0.05	92.7666	0.0575897	92.709	7.90377	100.613
Latah Fm, White Bird, ID	cpb00-30	33.48	0.15	6.26	1.63	0.05	0.06	0.47	0.04	0.73	4.94	0.1	0.04	52.44	100.39		71.6204	0.250215	11.8283	2.33041	0.06456	0.099474	0.657624	0.04466	0.983967	5.95072	0.1	0.04	93.9703	0.0511244	93.9192	7.27345	101.193
Latah Fm, White Bird, ID	cpb00-30	33.14	0.14	6.19	1.66	0.03	0.05	0.47	0.02	0.73	5.07	0.18	0.04	52.44	100.16		70.8931	0.233534	11.696	2.3733	0.038736	0.082895	0.657624	0.02233	0.983967	6.10732	0.18	0.04	93.3088	0.0848086	93.224	7.79686	101.021
Latah Fm, White Bird, ID	cpb00-30	33.3	0.11	6.21	1.66	0.04	0.04	0.46	0.04	0.65	4.96	0.11	0.04	52.31	99.93		71.2354	0.183491	11.7338	2.3733	0.051648	0.066316	0.643632	0.04466	0.876135	5.97482	0.11	0.04	93.3332	0.055335	93.2778	7.47753	100.755
Latah Fm, White Bird, ID	cpb00-30	33.33	0.13	6.29	1.71	0.03	0.04	0.48	0.08	0.5	4.95	0.2	0.05	52.33	100.12		71.2995	0.216853	11.885	2.44479	0.038736	0.066316	0.671616	0.08932	0.67395	5.96277	0.2	0.05	93.5988	0.0954845	93.5034	7.43752	100.941
Latah Fm, White Bird, ID	cpb00-30	33.11	0.17	6.32	1.73	0.03	0.05	0.51	0.04	0.76	5.24	0.15	0.03	51.98	100.12		70.8289	0.283577	11.9416	2.47338	0.038736	0.082895	0.713592	0.04466	1.0244	6.3121	0.15	0.03	93.9239	0.0699223	93.854	7.04309	100.897
Latah Fm, White Bird, ID	cpb00-30	32.84	0.19	6.28	1.76	0.06	0.05	0.51	0.06	0.94	5.5	0.24	0.04	51.55	100.02		70.2513	0.316939	11.8661	2.51627	0.077472	0.082895	0.713592	0.06699	1.26703	6.6253	0.24	0.04	94.0639	0.110072	93.9538	6.81831	100.772
Latah Fm, White Bird, ID	cpb00-30	32.91	0.15	6.33	1.78	0.04	0.04	0.51	0.05	0.85	5.08	0.2	0.06	51.96	99.96		70.4011	0.250215	11.9605	2.54487	0.051648	0.066316	0.713592	0.055825	1.14572	6.11937	0.2	0.06	93.5692	0.0977393	93.4714	7.29352	100.765
Latah Fm, White Bird, ID	cpb00-30	32.94	0.19	6.31	1.79	0.04	0.07	0.52	0.05	0.57	4.77	0.18	0.03	52.47	99.93		70.4652	0.316939	11.9227	2.55916	0.051648	0.116053	0.727584	0.055825	0.768303	5.74594	0.18	0.03	92.9395	0.0825538	92.8569	7.95111	100.808
Latah Fm, White Bird, ID	cpb00-30	32.98	0.14	6.42	1.79	0.05	0.06	0.5	0.05	0.59	4.69	0.17	0.04	52.94	100.42		70.5508	0.233534	12.1306	2.55916	0.06456	0.099474	0.6996	0.055825	0.795261	5.64957	0.17	0.04	93.0484	0.0805981	92.9678	8.37759	101.345
Latah Fm, White Bird, ID	cpb00-30	32.98	0.18	6.34	1.85	0.03	0.05	0.52	0.05	1.25	5.63	0.21	0.04	51.29	100.42		70.5508	0.300258	11.9794	2.64494	0.038736	0.082895	0.727584	0.055825	1.68488	6.7819	0.21	0.04	95.0973	0.0974402	94.9998	6.0915	101.091
Bully Creek Fm, OR	har94-22a	29.99	0	10.12	0.18	0.01	0	0.55	0.87	3.63	7.24	0	0	47.02	99.61		64.1546	0	19.1217	0.257346	0.012912	0	0.76956	0.971355	4.89288	8.7213	0	0	98.9017	0	98.9017	0.790549	99.6923
Bully Creek Fm, OR	har94-22a	33.71	0.16	6.31	1.73	0.02	0.06	0.48	0.05	1.93	5.01	0.17	0.05	50.81	100.49		72.1124	0.266896	11.9227	2.47338	0.025824	0.099474	0.671616	0.055825	2.60145	6.03505	0.17	0.05	96.4847	0.0828529	96.4018	4.59294	100.995
Bully Creek Fm, OR	har94-22a	33.92	0.14	6.29	1.66	0.04	0.05	0.48	0.04	2.18	4.48	0.15	0.05	50.34	99.82		72.5617	0.233534	11.885	2.3733	0.051648	0.082895	0.671616	0.04466	2.93842	5.39661	0.15	0.05	96.4393	0.0744319	96.3649	3.88078	100.246
Bully Creek Fm, OR	har94-22a	33.35	0.17	6.33	1.82	0.03	0.06	0.54	0.08	1.97	4.95	0.13	0.04	50.27	99.74		71.3423	0.283577	11.9605	2.60205	0.038736	0.099474	0.755568	0.08932	2.65536	5.96277	0.13	0.04	95.9597	0.063756	95.896	4.31834	100.214
Bully Creek Fm, OR	har94-22a	33.69	0.17	6.38	1.9	0.04	0.07	0.54	0.07	2	4.83	0.23	0.04	50.15	100.11		72.0696	0.283577	12.055	2.71643	0.051648	0.116053	0.755568	0.078155	2.6958	5.81822	0.23	0.04	96.9101	0.105861	96.8042	3.71271	100.517
Bully Creek Fm, OR	har94-22a	33.31	0.16	6.29	1.91	0.03	0.06	0.52	0.04	2.08	4.83	0.21	0.04	50.26	99.74		71.2568	0.266896	11.885	2.73073	0.038736	0.099474	0.727584	0.04466	2.80363	5.81822	0.21	0.04	95.9216	0.0974402	95.8242	4.3991	100.223
Bully Creek Fm, OR	har94-22a	33.3	0.18	6.39	1.82	0.02	0.06	0.54	0.06	2.12	4.86	0.18	0.05	50.68	100.26		71.2354	0.300258	12.0739	2.60205	0.025824	0.099474	0.755568	0.06699	2.85755	5.85436	0.18	0.05	96.1013	0.0870634	96.0143	4.77025	100.785
Bully Creek Fm, OR	har94-22a	33.57	0.17	6.41	1.92	0.04	0.06	0.5	0.07	2.21	4.65	0.24	0.04	50.44	100.32		71.8129	0.283577	12.1117	2.74502	0.051648	0.099474	0.6996	0.078155	2.97886	5.60139	0.24	0.04	96.7424	0.110072	96.6323	4.14244	100.775
Bully Creek Fm, OR	har94-22a	33.64	0.15	6.26	1.68	0.04	0.04	0.48	0.03	2.05	4.68	0.23	0.05	50.2	99.53		71.9627	0.250215	11.8283	2.4019	0.051648	0.066316	0.671616	0.033495	2.7632	5.63753	0.23	0.05	95.9469	0.108116	95.8388	4.14646	99.9852
Bully Creek Fm, OR	har94-22a	33.38	0.15	6.37	1.87	0.03	0.08	0.54	0.05	2	5.03	0.13	0.03	50.03	99.69		71.4065	0.250215	12.0361	2.67354	0.038736	0.132632	0.755568	0.055825	2.6958	6.05914	0.13	0.03	96.2641	0.0615012	96.2026	3.91715	100.12
Bully Creek Fm, OR	har94-22a	33.87	0.11	6.29	1.69	0	0.04	0.48	0.07	2.11	4.63	0.14	0.04	50.14	99.61		72.4547	0.183491	11.885	2.41619	0	0.066316	0.671616	0.078155	2.84407	5.5773	0.14	0.04	96.3568	0.0679665	96.2888	3.73007	100.019
Bully Creek Fm, OR	har94-22a	33.78	0.18	6.21	1.63	0.05	0.03	0.46	0.07	2.16	4.58	0.23	0.04	49.91	99.33		72.2622	0.300258	11.7338	2.33041	0.06456	0.049737	0.643632	0.078155	2.91146	5.51707	0.23	0.04	96.1613	0.105861	96.0554	3.67771	99.7331
Bully Creek Fm, OR	har94-22a	33.68	0.14	6.19	1.7	0.04	0.04	0.46	0.05	1.95	4.88	0.24	0.05	50.19	99.61		72.0483	0.233534	11.696	2.43049	0.051648	0.066316	0.643632	0.055825	2.62841	5.87845	0.24	0.05	96.0226	0.112327	95.9102	4.15602	100.066
Bully Creek Fm, OR	har94-22a	33.85	0.15	6.25	1.69	0.04	0.05	0.47	0.08	2.06	4.92	0.14	0.04	51.32	101.06		72.4119	0.250215	11.8094	2.41619	0.051648	0.082895	0.657624	0.08932	2.77667	5.92663	0.14	0.04	96.6525	0.0679665	96.5845	5.02864	101.613
Bully Creek Fm, OR	har94-22a	34.08	0.1	6.14	1.53	0.04	0.04	0.42	0.02	1.79	5.05	0.2	0.05	50.31	99.77		72.9039	0.16681	11.6015	2.18744	0.051648	0.066316	0.587664	0.02233	2.41274	6.08323	0.2	0.05	96.3336	0.0954845	96.2382	3.96705	100.205
Bully Creek Fm, OR	har94-22a	33.82	0.12	6.31	1.73	0.04	0.04	0.48	0.06	1.99	4.85	0.21	0.03	50.42	100.1		72.3477	0.200172	11.9227	2.47338	0.051648	0.066316	0.671616	0.06699	2.68232	5.84231	0.21	0.03	96.5652	0.0951854	96.4701	4.07743	100.547
Bully Creek Fm, OR	har94-22a	34.2	0.11	6.11	1.51	0.03	0.03	0.43	0.01	1.97	5	0.18	0.04	50.69	100.31		73.1606	0.183491	11.5448	2.15885	0.038736	0.049737	0.601656	0.011165	2.65536	6.023	0.18	0.04	96.6475	0.0848086	96.5627	4.20947	100.772
Bully Creek Fm, OR	har94-22a	33.38	0.16	6.4	1.94	0.01	0.05	0.54	0.11	2.12	4.61	0.21	0.05	50.67	100.25		71.4065	0.266896	12.0928	2.77362	0.012912	0.082895	0.755568	0.122815	2.85755	5.55321	0.21	0.05	96.1848	0.099695	96.0851	4.67935	100.764
Bully Creek Fm, OR	har94-22a	33.45	0.17	6.34	1.89	0.03	0.05	0.51	0.1	2.33	4.61	0.18	0.04	50.19	99.89		71.5562	0.283577	11.9794	2.70213	0.038736	0.082895	0.713592	0.11165	3.14061	5.55321	0.18	0.04	96.3821	0.0848086	96.2973	4.03563	100.333
Bully Creek Fm, OR	har94-22a	33.86	0.18	6.32	1.71	0.02	0.05	0.48	0.05	2.09	4.73	0.23	0.05	50.65	100.42		72.4333	0.300258	11.9416	2.44479	0.025824	0.082895	0.671616	0.055825	2.81711	5.69776	0.23	0.05	96.751	0.108116	96.6429	4.24297	100.886
Bully Creek Fm, OR	har96-40	34.1	0.13	6.24	1.5	0.01	0.04	0.42	0.07	2.09	4.81	0.23	0.058	50.84	100.538		72.9467	0.216853	11.7905	2.14455	0.012912	0.066316	0.587664	0.078155	2.81711	5.79413	0.23	0.058	96.7429	0.10992	96.633	4.38688	101.02
Bully Creek Fm, OR	har96-40	33.82	0.13	6.15	1.53	0.02	0.04	0.41	0.07	1.9	5.18	0.24	0.037	50.68	100.207		72.3477	0.216853	11.6204	2.18744	0.025824	0.066316	0.573672	0.078155	2.56101	6.23983	0.24	0.037	96.1943	0.109395	96.0849	4.63114	100.716
Bully Creek Fm, OR	har96-40	33.84	0.11	6.21	1.54	0.04	0.03	0.4	0.08	1.82	5.14	0.21	0.033	50.55	100.003		72.3905	0.183491	11.7338	2.20174	0.051648	0.049737	0.55968	0.08932	2.45318	6.19164	0.21	0.033	96.1478	0.0958619	96.0519	4.43872	100.491
Bully Creek Fm, OR	har96-40	33.48	0.13	6.26	1.68	0.04	0.06	0.5	0.13	1.21	5.32	0.26	0.028	50.6	99.698		71.6204	0.216853	11.8283	2.4019	0.051648	0.099474	0.6996	0.145145	1.63096	6.40847	0.26	0.028	95.3907	0.115787	95.2749	4.96967	100.245
Bully Creek Fm, OR	har96-40	33.66	0.2	6.3	1.69	0.04	0.05	0.47	0.13	2.08	4.79	0.32	0.048	51.26	101.038		72.0055	0.33362	11.9039	2.41619	0.051648	0.082895	0.657624	0.145145	2.80363	5.77003	0.32	0.048	96.5381	0.14556	96.3926	5.21988	101.612
Bully Creek Fm, OR	har96-40	33.6	0.14	6.26	1.69	0.03	0.05	0.48	0.09	2.41	4.55	0.24	0.035	51.44	101.015		71.8771	0.233534	11.8283	2.41619	0.038736	0.082895	0.671616	0.100485	3.24844	5.48093	0.24	0.035	96.2532	0.108944	96.1443	5.47336	101.618
Bully Creek Fm, OR	har96-40	33.17	0.17	6.38	1.73	0.03	0.07	0.53	0.17	2.01	4.94	0.28	0.026	50.51	100.016		70.9573	0.283577	12.055	2.47338	0.038736	0.116053	0.741576	0.189805	2.70928	5.95072	0.28	0.026	95.8214	0.123757	95.6976	4.85194	100.55
Bully Creek Fm, OR	har96-40	33.38	0.13	6.31	1.73	0.06	0.05	0.49	0.11	2.15	4.83	0.23	0.045	51.28	100.795		71.4065	0.216853	11.9227	2.47338	0.077472	0.082895	0.685608	0.122815	2.89799	5.81822	0.23	0.045	95.9795	0.106989	95.8725	5.53163	101.404
Bully Creek Fm, OR	har96-40	33.54	0.14	6.27	1.74	0.04	0.05	0.51	0.09	2.03	4.82	0.27	0.039	50.61	100.149		71.7488	0.233534	11.8472	2.48768	0.051648	0.082895	0.713592	0.100485	2.73624	5.80617	0.27	0.039	96.1172	0.122478	95.9947	4.66737	100.662
Bully Creek Fm, OR	har96-40	33.81	0.2	6.29	1.75	0.05	0.04	0.48	0.11	2.12	5.02	0.22	0.039	51.68	101.809		72.3264	0.33362	11.885	2.50197	0.06456	0.066316	0.671616	0.122815	2.85755	6.04709	0.22	0.039	97.1358	0.101425	97.0344	5.36512	102.4
Bully Creek Fm, OR	har96-40	33.5	0.16	6.25	1.78	0.05	0.05	0.47	0.13	1.96	4.97	0.21	0.047	50.68	100.257		71.6632	0.266896	11.8094	2.54487	0.06456	0.082895	0.657624	0.145145	2.64188	5.98686	0.21	0.047	96.1203	0.0990186	96.0213	4.75894	100.78
Bully Creek Fm, OR	har96-40	33.53	0.18	6.42	1.81	0.06	0.06	0.53	0.11	2.01	5.06	0.26	0.029	51.25	101.309		71.7274	0.300258	12.1306	2.58776	0.077472	0.099474	0.741576	0.122815	2.70928	6.09528	0.26	0.029	96.8809	0.116013	96.7649	5.1059	101.871
Bully Creek Fm, OR	har96-40	33.36	0.17	6.41	1.81	0.05	0.05	0.53	0.14	2.22	4.85	0.24	0.031	51.14	101.001		71.3637	0.283577	12.1117	2.58776	0.06456	0.082895	0.741576	0.15631	2.99234	5.84231	0.24	0.031	96.4977	0.108042	96.3897	5.1815	101.571
Bully Creek Fm, OR	har96-40	33.13	0.16	6.39	1.82	0.04	0.07	0.54	0.13	2.15	4.92	0.18	0.033	50.71	100.273		70.8717	0.266896	12.0739	2.60205	0.051648	0.116053	0.755568	0.145145	2.89799	5.92663	0.18	0.033	95.9206	0.0832303	95.8374	4.98391	100.821
Bully Creek Fm, OR	har96-40	33.32	0.15	6.35	1.83	0.04	0.06	0.53	0.18	1.99	4.93	0.29	0.046	51.51	101.226		71.2781	0.250215	11.9983	2.61635	0.051648	0.099474	0.741576	0.20097	2.68232	5.93868	0.29	0.046	96.1937	0.132477	96.0612	5.80413	101.865
Bully Creek Fm, OR	har96-40	33.31	0.17	6.33	1.85	0.05	0.07	0.51	0.12	1.9	5.29	0.18	0.037	51.02	100.837		71.2568	0.283577	11.9605	2.64494	0.06456	0.116053	0.713592	0.13398	2.56101	6.37233	0.18	0.037	96.3243	0.0841322	96.2402	5.16515	101.405
Bully Creek Fm, OR	har96-40	33.24	0.16	6.4	1.86	0.03	0.07	0.53	0.08	2.48	4.64	0.27	0.032	51.57	101.362		71.107	0.266896	12.0928	2.65924	0.038736	0.116053	0.741576	0.08932	3.34279	5.58934	0.27	0.032	96.3458	0.1209	96.2249	5.7731	101.998
Bully Creek Fm, OR	har96-40	33.44	0.18	6.34	1.88	0.05	0.06	0.54	0.07	1.91	5.16	0.22	0.047	50.66	100.557		71.5348	0.300258	11.9794	2.68784	0.06456	0.099474	0.755568	0.078155	2.57449	6.21574	0.22	0.047	96.5574	0.103229	96.4541	4.6095	101.064
Bully Creek Fm, OR	har96-40	33.45	0.19	6.41	1.88	0.04	0.06	0.55	0.18	2.21	4.9	0.23	0.043	51.5	101.643		71.5562	0.316939	12.1117	2.68784	0.051648	0.099474	0.76956	0.20097	2.97886	5.90254	0.23	0.043	96.9488	0.106538	96.8422	5.39461	102.237
Bully Creek Fm, OR	har96-40	33.29	0.18	6.37	1.89	0.04	0.06	0.55	0.13	2.28	4.66	0.28	0.069	51.54	101.339		71.214	0.300258	12.0361	2.70213	0.051648	0.099474	0.76956	0.145145	3.07321	5.61344	0.28	0.069	96.3539	0.133453	96.2205	5.75212	101.973
Bully Creek Fm, OR	har96-40	33.2	0.19	6.39	1.92	0.04	0.05	0.54	0.1	1.98	5.14	0.24	0.039	50.97	100.799		71.0214	0.316939	12.0739	2.74502	0.051648	0.082895	0.755568	0.11165	2.66884	6.19164	0.24	0.039	96.2986	0.109846	96.1887	5.18036	101.369
Bully Creek Fm, OR	har96-40	32.67	0.15	6.52	2.21	0.04	0.08	0.64	0.17	2.22	5.13	0.24	0.048	50.52	100.638		69.8877	0.250215	12.3195	3.15964	0.051648	0.132632	0.895488	0.189805	2.99234	6.1796	0.24	0.048	96.3466	0.111876	96.2347	4.94753	101.182
Bully Creek Fm, OR	har94-16	32.82	0.1	6.32	1.83	0.05	0.07	0.54	0.07	0.8	4.96	0.2	0.03	51.11	98.9		70.2085	0.16681	11.9416	2.61635	0.06456	0.116053	0.755568	0.078155	1.07832	5.97482	0.2	0.03	93.2308	0.0909749	93.1398	6.47404	99.6139
Bully Creek Fm, OR	har94-16	32.49	0.15	6.59	2.22	0.07	0.06	0.66	0.12	0.59	4.63	0.17	0.06	51.65	99.46		69.5026	0.250215	12.4518	3.17393	0.090384	0.099474	0.923472	0.13398	0.795261	5.5773	0.17	0.06	93.2284	0.0851077	93.1433	7.10013	100.243
Bully Creek Fm, OR	har94-16	32.51	0.2	6.41	2.18	0.06	0.08	0.67	0.07	0.76	4.98	0.24	0.03	50.79	98.98		69.5454	0.33362	12.1117	3.11675	0.077472	0.132632	0.937464	0.078155	1.0244	5.99891	0.24	0.03	93.6265	0.107817	93.5187	6.13787	99.6565
Bully Creek Fm, OR	har94-16	32.9	0.16	6.32	1.83	0.03	0.07	0.55	0.07	0.76	5.08	0.13	0.05	50.87	98.82		70.3797	0.266896	11.9416	2.61635	0.038736	0.116053	0.76956	0.078155	1.0244	6.11937	0.13	0.05	93.5308	0.0660108	93.4648	6.01841	99.4832
Bully Creek Fm, OR	har94-16	33.27	0.16	6.05	1.48	0.01	0.03	0.43	0.02	0.89	5.33	0.28	0.04	51.26	99.25		71.1712	0.266896	11.4315	2.11596	0.012912	0.049737	0.601656	0.02233	1.19963	6.42052	0.28	0.04	93.6123	0.126914	93.4854	6.47904	99.9644
Bully Creek Fm, OR	har94-16	32.61	0.17	6.26	1.75	0.05	0.06	0.54	0.1	0.77	5.03	0.17	0.05	51.14	98.7		69.7593	0.283577	11.8283	2.50197	0.06456	0.099474	0.755568	0.11165	1.03788	6.05914	0.17	0.05	92.7214	0.0828529	92.6386	6.81302	99.4516
Bully Creek Fm, OR	har94-16	33.34	0.11	6.05	1.51	0.03	0.03	0.41	0	0.93	5.56	0.23	0.04	50.5	98.74		71.3209	0.183491	11.4315	2.15885	0.038736	0.049737	0.573672	0	1.25355	6.69758	0.23	0.04	93.978	0.105861	93.8721	5.47015	99.3423
Bully Creek Fm, OR	har94-16	32.84	0.12	6.16	1.75	0.04	0.05	0.49	0.08	0.7	5.04	0.21	0.05	50.3	97.83		70.2513	0.200172	11.6393	2.50197	0.051648	0.082895	0.685608	0.08932	0.94353	6.07118	0.21	0.05	92.777	0.099695	92.6773	5.79068	98.468
Bully Creek Fm, OR	har94-16	32.48	0.17	6.29	1.81	0.03	0.06	0.51	0.06	1.29	5.76	0.24	0.06	50.3	99.06		69.4812	0.283577	11.885	2.58776	0.038736	0.099474	0.713592	0.06699	1.73879	6.9385	0.24	0.06	94.1336	0.114581	94.019	5.665	99.684
Bully Creek Fm, OR	har94-16	33.44	0.15	6.01	1.42	0	0.04	0.43	0.01	1.01	5.62	0.22	0.02	50.35	98.72		71.5348	0.250215	11.3559	2.03017	0	0.066316	0.601656	0.011165	1.36138	6.76985	0.22	0.02	94.2215	0.0971412	94.1244	5.1639	99.2883
Bully Creek Fm, OR	har94-16	34.06	0.12	5.92	1.34	0.03	0.03	0.37	0	0.81	5.42	0.15	0.04	51.58	99.87		72.8612	0.200172	11.1858	1.9158	0.038736	0.049737	0.517704	0	1.0918	6.52893	0.15	0.04	94.5799	0.0721771	94.5077	6.02633	100.534
Bully Creek Fm, OR	har94-16	32.49	0.2	6.38	1.94	0.04	0.05	0.62	0.13	0.52	4.56	0.14	0.05	50.85	97.97		69.5026	0.33362	12.055	2.77362	0.051648	0.082895	0.867504	0.145145	0.700908	5.49298	0.14	0.05	92.1959	0.0702213	92.1257	6.56874	98.6945
Bully Creek Fm, OR	har94-16	33.31	0.14	6.04	1.45	0.04	0.04	0.4	0	0.95	5.47	0.23	0.06	50.48	98.61		71.2568	0.233534	11.4126	2.07306	0.051648	0.066316	0.55968	0	1.28051	6.58916	0.23	0.06	93.8132	0.110371	93.7029	5.51435	99.2172
Bully Creek Fm, OR	har94-16	33.42	0.09	6.08	1.48	0.03	0.05	0.42	0.03	0.74	5.31	0.21	0.04	51.33	99.23		71.4921	0.150129	11.4882	2.11596	0.038736	0.082895	0.587664	0.033495	0.997446	6.39643	0.21	0.04	93.633	0.0974402	93.5355	6.40009	99.9356
Bully Creek Fm, OR	har94-16	32.66	0.16	6.28	1.84	0.02	0.05	0.53	0.09	1.41	5.88	0.17	0.04	50.44	99.57		69.8663	0.266896	11.8661	2.63065	0.025824	0.082895	0.741576	0.100485	1.90054	7.08305	0.17	0.04	94.7742	0.0805981	94.6936	5.47973	100.173
Bully Creek Fm, OR	har94-16	33.07	0.14	6.23	1.65	0.04	0.05	0.47	0.05	1.72	5.57	0.28	0.02	50.73	100.02		70.7433	0.233534	11.7716	2.359	0.051648	0.082895	0.657624	0.055825	2.31839	6.70962	0.28	0.02	95.2835	0.122404	95.1611	5.46012	100.621
Bully Creek Fm, OR	har94-16	33.11	0.14	6.28	1.64	0.04	0.04	0.47	0.05	0.8	5.17	0.21	0.06	51.59	99.6		70.8289	0.233534	11.8661	2.34471	0.051648	0.066316	0.657624	0.055825	1.07832	6.22778	0.21	0.06	93.6807	0.10195	93.5788	6.76771	100.346
Bully Creek Fm, OR	har94-16	33.32	0.12	6.05	1.5	0.05	0.04	0.43	0	0.9	5.3	0.22	0.04	50.77	98.74		71.2781	0.200172	11.4315	2.14455	0.06456	0.066316	0.601656	0	1.21311	6.38438	0.22	0.04	93.6444	0.101651	93.5427	5.84079	99.3835
Bully Creek Fm, OR	har94-16	32.52	0.15	6.44	2.06	0.04	0.05	0.6	0.12	0.65	4.81	0.22	0.05	51.97	99.68		69.5668	0.250215	12.1684	2.94518	0.051648	0.082895	0.83952	0.13398	0.876135	5.79413	0.22	0.05	92.9789	0.103906	92.875	7.64955	100.525
Bully Creek Fm, OR	har94-16	32.75	0.2	6.31	1.8	0.04	0.06	0.53	0.05	0.79	5.21	0.26	0.04	51.5	99.54		70.0588	0.33362	11.9227	2.57346	0.051648	0.099474	0.741576	0.055825	1.06484	6.27597	0.26	0.04	93.478	0.118493	93.3595	6.94698	100.306
Trout Creek, OR	tco93-40	33.28	0.18	6.3	1.74	0.05	0.04	0.48	0.05	1.87	5.05	0.15	0.06	51.27	100.52		71.1926	0.300258	11.9039	2.48768	0.06456	0.066316	0.671616	0.055825	2.52057	6.08323	0.15	0.06	95.5565	0.0766866	95.4798	5.66405	101.144
Trout Creek, OR	tco93-40	33.26	0.15	6.25	1.7	0.03	0.058	0.5	0	1.64	5.23	0.17	0.04	50.97	99.998		71.1498	0.250215	11.8094	2.43049	0.038736	0.0961582	0.6996	0	2.21056	6.30006	0.17	0.04	95.195	0.0805981	95.1144	5.48789	100.602
Trout Creek, OR	tco93-40	33.51	0.13	6.12	1.49	0.02	0.026	0.43	0.06	1.57	5.23	0.16	0.04	50.76	99.546		71.6846	0.216853	11.5637	2.13025	0.025824	0.0431054	0.601656	0.06699	2.1162	6.30006	0.16	0.04	94.9493	0.0763876	94.8729	5.25105	100.124
Trout Creek, OR	tco93-40	33.33	0.18	6.37	1.83	0.09	0.045	0.54	0.01	1.3	5.06	0.18	0.05	50.34	99.325		71.2995	0.300258	12.0361	2.61635	0.116208	0.0746055	0.755568	0.011165	1.75227	6.09528	0.18	0.05	95.2874	0.0870634	95.2003	4.6341	99.8344
Trout Creek, OR	tco93-40	32.69	0.19	6.24	1.85	0.02	0.066	0.55	0.03	1.42	4.95	0.14	0.05	50.2	98.396		69.9304	0.316939	11.7905	2.64494	0.025824	0.109421	0.76956	0.033495	1.91402	5.96277	0.14	0.05	93.6879	0.0702213	93.6177	5.36952	98.9872
Trout Creek, OR	tco93-40	32.76	0.19	6.19	1.7	0.02	0.051	0.51	0.13	1.99	4.78	0.23	0.02	51.21	99.781		70.0802	0.316939	11.696	2.43049	0.025824	0.0845529	0.713592	0.145145	2.68232	5.75799	0.23	0.02	94.183	0.101352	94.0817	6.40562	100.487
Trout Creek, OR	tco93-40	32.84	0.17	6.18	1.75	0.04	0.059	0.5	0.11	1.71	4.98	0.18	0.03	51.08	99.629		70.2513	0.283577	11.6771	2.50197	0.051648	0.0978161	0.6996	0.122815	2.30491	5.99891	0.18	0.03	94.1997	0.0825538	94.1171	6.19473	100.312
Trout Creek, OR	tco93-40	32.75	0.2	6.17	1.8	0.05	0.054	0.52	0.12	2	4.89	0.21	0.03	51.24	100.034		70.0588	0.33362	11.6582	2.57346	0.06456	0.0895266	0.727584	0.13398	2.6958	5.89049	0.21	0.03	94.466	0.0951854	94.3709	6.36493	100.736
Trout Creek, OR	tco93-40	32.77	0.13	6.15	1.77	0.03	0.057	0.51	0.13	1.94	4.87	0.22	0.05	50.68	99.307		70.1016	0.216853	11.6204	2.53057	0.038736	0.0945003	0.713592	0.145145	2.61493	5.8664	0.22	0.05	94.2127	0.103906	94.1088	5.84183	99.9507
Trout Creek, OR	tco93-40	33.52	0.11	6.1	1.48	0.04	0.041	0.4	0.04	1.92	4.9	0.14	0.03	51.97	100.691		71.706	0.183491	11.5259	2.11596	0.051648	0.0679739	0.55968	0.04466	2.58797	5.90254	0.14	0.03	94.9159	0.0657117	94.8501	6.56479	101.415
Trout Creek, OR	tco93-40	33.57	0.16	6.03	1.5	0.04	0.045	0.4	0.06	1.65	5.23	0.24	0.04	50.87	99.835		71.8129	0.266896	11.3937	2.14455	0.051648	0.0746055	0.55968	0.06699	2.22404	6.30006	0.24	0.04	95.1751	0.110072	95.065	5.36002	100.425
Trout Creek, OR	tco93-40	33.39	0.19	6.02	1.44	0.03	0.033	0.42	0.07	1.86	4.91	0.2	0.03	50.96	99.553		71.4279	0.316939	11.3748	2.05877	0.038736	0.0547107	0.587664	0.078155	2.50709	5.91459	0.2	0.03	94.5893	0.0909749	94.4984	5.68032	100.179
Trout Creek, OR	tco93-40	33.42	0.1	6.01	1.42	0.03	0.024	0.39	0.04	2.03	4.73	0.19	0.05	51.57	100.004		71.4921	0.16681	11.3559	2.03017	0.038736	0.0397896	0.545688	0.04466	2.73624	5.69776	0.19	0.05	94.3878	0.091274	94.2965	6.41476	100.711
Trout Creek, OR	tco93-40	33.37	0.14	5.97	1.46	0.03	0.033	0.43	0.05	1.81	4.98	0.2	0.04	51.24	99.753		71.3851	0.233534	11.2803	2.08736	0.038736	0.0547107	0.601656	0.055825	2.4397	5.99891	0.2	0.04	94.4158	0.0932297	94.3226	6.10303	100.426
Trout Creek, OR	tco93-40	33.47	0.17	5.93	1.44	0.03	0.03	0.4	0.05	1.77	4.94	0.14	0.04	51.18	99.59		71.599	0.283577	11.2047	2.05877	0.038736	0.049737	0.55968	0.055825	2.38578	5.95072	0.14	0.04	94.3666	0.0679665	94.2986	5.94665	100.245
Huntington Creek 1	htc93-439	33.61	0.11	5.98	1.46	0.01	0.026	0.42	0.05	1.43	5.76	0.23	0.029	50.69	99.805		71.8985	0.183491	11.2992	2.08736	0.012912	0.0431054	0.587664	0.055825	1.9275	6.9385	0.23	0.029	95.2931	0.103381	95.1897	5.18598	100.376
Huntington Creek 1	htc93-439	33.46	0.12	5.99	1.48	0.05	0.041	0.42	0.05	1.4	5.7	0.25	0.034	50.98	99.975		71.5776	0.200172	11.3181	2.11596	0.06456	0.0679739	0.587664	0.055825	1.88706	6.86622	0.25	0.034	95.0252	0.112929	94.9122	5.68939	100.602
Huntington Creek 1	htc93-439	33.45	0.14	5.99	1.48	0.04	0.034	0.39	0.06	1.58	5.78	0.18	0.055	50.49	99.669		71.5562	0.233534	11.3181	2.11596	0.051648	0.0563686	0.545688	0.06699	2.12968	6.96259	0.18	0.055	95.2718	0.0881908	95.1836	5.03984	100.223
Huntington Creek 1	htc93-439	33.87	0.19	6.07	1.51	0	0.036	0.41	0.06	1.42	5.7	0.23	0.045	50.6	100.141		72.4547	0.316939	11.4693	2.15885	0	0.0596844	0.573672	0.06699	1.91402	6.86622	0.23	0.045	96.1553	0.106989	96.0484	4.59794	100.646
Huntington Creek 1	htc93-439	33.77	0.16	6.08	1.48	0.04	0.036	0.42	0.09	1.25	5.68	0.24	0.056	51	100.302		72.2408	0.266896	11.4882	2.11596	0.051648	0.0596844	0.587664	0.100485	1.68488	6.84213	0.24	0.056	95.7343	0.113679	95.6206	5.26029	100.881
Huntington Creek 1	htc93-439	33.1	0.12	6.1	1.67	0.04	0.043	0.45	0.11	1.54	5.81	0.26	0.043	50.61	99.896		70.8075	0.200172	11.5259	2.3876	0.051648	0.0712897	0.62964	0.122815	2.07577	6.99873	0.26	0.043	95.1741	0.119169	95.055	5.43996	100.495
Huntington Creek 1	htc93-439	33.21	0.16	6.11	1.7	0.06	0.052	0.46	0.1	1.61	5.6	0.19	0.039	50.52	99.811		71.0428	0.266896	11.5448	2.43049	0.077472	0.0862108	0.643632	0.11165	2.17012	6.74576	0.19	0.039	95.3489	0.0887937	95.2601	5.11354	100.374
Huntington Creek 1	htc93-439	33.23	0.17	6.15	1.69	0.03	0.043	0.48	0.07	1.26	5.77	0.26	0.051	50.56	99.764		71.0856	0.283577	11.6204	2.41619	0.038736	0.0712897	0.671616	0.078155	1.69835	6.95054	0.26	0.051	95.2255	0.120973	95.1045	5.23568	100.34
Huntington Creek 1	htc93-439	32.97	0.14	6.15	1.79	0.05	0.049	0.47	0.04	1.85	5.44	0.22	0.047	50.86	100.076		70.5294	0.233534	11.6204	2.55916	0.06456	0.0812371	0.657624	0.04466	2.49362	6.55302	0.22	0.047	95.1043	0.103229	95.001	5.70318	100.704
Huntington Creek 1	htc93-439	33.38	0.13	6.18	1.7	0.02	0.054	0.48	0.11	1.5	5.84	0.16	0.033	50.71	100.297		71.4065	0.216853	11.6771	2.43049	0.025824	0.0895266	0.671616	0.122815	2.02185	7.03486	0.16	0.033	95.8904	0.0748092	95.8156	5.03527	100.851
Huntington Creek 1	htc93-439	33.4	0.14	6.18	1.68	0.05	0.05	0.48	0.11	1.48	5.76	0.21	0.057	50.59	100.187		71.4493	0.233534	11.6771	2.4019	0.06456	0.082895	0.671616	0.122815	1.99489	6.9385	0.21	0.057	95.9041	0.101273	95.8028	4.92594	100.729
Huntington Creek 1	htc93-439	33.16	0.2	6.18	1.67	0.04	0.054	0.51	0.08	1.15	5.63	0.2	0.049	50.68	99.603		70.9359	0.33362	11.6771	2.3876	0.051648	0.0895266	0.713592	0.08932	1.55008	6.7819	0.2	0.049	94.8593	0.095259	94.764	5.43766	100.202
Huntington Creek 1	htc93-439	33.34	0.16	6.19	1.7	0.03	0.042	0.5	0.06	1.13	5.6	0.22	0.04	51.36	100.372		71.3209	0.266896	11.696	2.43049	0.038736	0.0696318	0.6996	0.06699	1.52313	6.74576	0.22	0.04	95.1182	0.101651	95.0165	6.01869	101.035
Huntington Creek 1	htc93-439	33.51	0.15	6.19	1.72	0.03	0.05	0.49	0.06	1.53	5.6	0.18	0.048	51.23	100.788		71.6846	0.250215	11.696	2.45908	0.038736	0.082895	0.685608	0.06699	2.06229	6.74576	0.18	0.048	96.0002	0.0866125	95.9136	5.47749	101.391
Huntington Creek 1	htc93-439	33.28	0.16	6.21	1.78	0.05	0.038	0.49	0.06	1.61	5.59	0.23	0.039	51.01	100.547		71.1926	0.266896	11.7338	2.54487	0.06456	0.0630002	0.685608	0.06699	2.17012	6.73371	0.23	0.039	95.7911	0.105636	95.6855	5.46298	101.148
Huntington Creek 1	htc93-439	33.07	0.15	6.22	1.82	0.04	0.057	0.53	0.1	1.85	5.35	0.25	0.058	51.16	100.655		70.7433	0.250215	11.7527	2.60205	0.051648	0.0945003	0.741576	0.11165	2.49362	6.44461	0.25	0.058	95.5939	0.118341	95.4756	5.82068	101.296
Huntington Creek 1	htc93-439	32.89	0.14	6.23	1.71	0.07	0.044	0.5	0.09	1.29	5.82	0.22	0.038	50.59	99.632		70.3583	0.233534	11.7716	2.44479	0.090384	0.0729476	0.6996	0.100485	1.73879	7.01077	0.22	0.038	94.7792	0.1012	94.678	5.56709	100.245
Huntington Creek 1	htc93-439	33.44	0.18	6.25	1.74	0.04	0.048	0.48	0.09	1.52	5.78	0.26	0.048	51.29	101.166		71.5348	0.300258	11.8094	2.48768	0.051648	0.0795792	0.671616	0.100485	2.04881	6.96259	0.26	0.048	96.3549	0.120297	96.2346	5.54157	101.776
Huntington Creek 1	htc93-439	32.8	0.17	6.26	1.87	0.05	0.058	0.53	0.09	1.75	5.57	0.2	0.047	50.62	100.015		70.1658	0.283577	11.8283	2.67354	0.06456	0.0961582	0.741576	0.100485	2.35883	6.70962	0.2	0.047	95.2694	0.094808	95.1746	5.43932	100.614
Huntington Creek 1	htc93-439	33.42	0.12	6.26	1.69	0.05	0.033	0.48	0.05	1.49	5.86	0.24	0.048	50.28	100.021		71.4921	0.200172	11.8283	2.41619	0.06456	0.0547107	0.671616	0.055825	2.00837	7.05896	0.24	0.048	96.1387	0.111876	96.0269	4.48715	100.514
Buffalo Canyon	buf94-617	34.36	0.14	6.03	1.56	0.02	0.038	0.41	0.01	1.85	5	0.22	0.048	51	100.686		73.5029	0.233534	11.3937	2.23033	0.025824	0.0630002	0.573672	0.011165	2.49362	6.023	0.22	0.048	96.8187	0.103455	96.7153	4.46075	101.176
Buffalo Canyon	buf94-617	33.9	0.17	6.06	1.45	0.02	0.038	0.41	0.04	1.49	5.67	0.25	0.046	50.83	100.374		72.5189	0.283577	11.4504	2.07306	0.025824	0.0630002	0.573672	0.04466	2.00837	6.83008	0.25	0.046	96.1675	0.115635	96.0519	4.85612	100.908
Buffalo Canyon	buf94-617	34.14	0.11	6.08	1.5	0.02	0.038	0.41	0.01	1.62	5.57	0.2	0.046	50.78	100.524		73.0323	0.183491	11.4882	2.14455	0.025824	0.0630002	0.573672	0.011165	2.1836	6.70962	0.2	0.046	96.6614	0.0945826	96.5668	4.44555	101.012
Buffalo Canyon	buf94-617	34.03	0.1	6.08	1.49	0.03	0.041	0.43	0	1.45	5.76	0.19	0.055	50.65	100.306		72.797	0.16681	11.4882	2.13025	0.038736	0.0679739	0.601656	0	1.95446	6.9385	0.19	0.055	96.4285	0.0924014	96.3361	4.45982	100.796
Buffalo Canyon	buf94-617	34.31	0.14	6.09	1.51	0.04	0.036	0.41	0.02	1.63	5.48	0.16	0.046	50.93	100.802		73.396	0.233534	11.5071	2.15885	0.051648	0.0596844	0.573672	0.02233	2.19708	6.60121	0.16	0.046	97.007	0.0777405	96.9293	4.35049	101.28
Buffalo Canyon	buf94-617	33.71	0.13	6.19	1.74	0.06	0.049	0.5	0.03	1.73	5.28	0.27	0.043	50.97	100.702		72.1124	0.216853	11.696	2.48768	0.077472	0.0812371	0.6996	0.033495	2.33187	6.36029	0.27	0.043	96.4099	0.12338	96.2865	4.96113	101.248
Buffalo Canyon	buf94-617	33.89	0.14	6.21	1.71	0.02	0.035	0.46	0.03	1.95	5.02	0.22	0.05	50.71	100.445		72.4975	0.233534	11.7338	2.44479	0.025824	0.0580265	0.643632	0.033495	2.62841	6.04709	0.22	0.05	96.6161	0.103906	96.5122	4.41817	100.93
Buffalo Canyon	buf94-617	33.66	0.17	6.23	1.74	0.05	0.065	0.52	0.04	1.72	5.66	0.21	0.054	50.57	100.689		72.0055	0.283577	11.7716	2.48768	0.06456	0.107763	0.727584	0.04466	2.31839	6.81804	0.21	0.054	96.8933	0.100597	96.7927	4.37705	101.17
Buffalo Canyon	buf94-617	33.83	0.16	6.24	1.76	0.04	0.041	0.5	0	1.99	5.07	0.24	0.063	50.78	100.714		72.3691	0.266896	11.7905	2.51627	0.051648	0.0679739	0.6996	0	2.68232	6.10732	0.24	0.063	96.8546	0.115258	96.7394	4.46518	101.205
Buffalo Canyon	buf94-617	33.76	0.16	6.25	1.68	0.01	0.05	0.48	0.01	1.82	5.16	0.26	0.042	51	100.682		72.2194	0.266896	11.8094	2.4019	0.012912	0.082895	0.671616	0.011165	2.45318	6.21574	0.26	0.042	96.4471	0.118944	96.3281	4.89187	101.22
Buffalo Canyon	buf94-617	34.28	0.15	6.25	1.65	0.05	0.043	0.44	0.04	1.96	5.1	0.21	0.059	50.89	101.122		73.3318	0.250215	11.8094	2.359	0.06456	0.0712897	0.615648	0.04466	2.64188	6.14346	0.21	0.059	97.6009	0.101724	97.4991	4.06938	101.569
Buffalo Canyon	buf94-617	33.74	0.15	6.3	1.85	0.04	0.069	0.53	0.01	1.97	4.93	0.22	0.058	50.79	100.657		72.1766	0.250215	11.9039	2.64494	0.051648	0.114395	0.741576	0.011165	2.65536	5.93868	0.22	0.058	96.7664	0.105709	96.6607	4.48955	101.15
Buffalo Canyon	buf94-617	33.5	0.14	6.31	1.96	0.05	0.086	0.55	0.1	2.21	4.52	0.25	0.032	50.1	99.808		71.6632	0.233534	11.9227	2.80221	0.06456	0.142579	0.76956	0.11165	2.97886	5.44479	0.25	0.032	96.4157	0.112478	96.3032	3.93667	100.24
Buffalo Canyon	buf94-617	33.56	0.17	6.32	1.87	0.02	0.068	0.52	0.07	1.89	5.23	0.12	0.031	50.56	100.429		71.7916	0.283577	11.9416	2.67354	0.025824	0.112737	0.727584	0.078155	2.54753	6.30006	0.12	0.031	96.6332	0.0575162	96.5757	4.32872	100.904
Buffalo Canyon	buf94-617	33.62	0.17	6.32	1.88	0.03	0.057	0.53	0.05	1.95	4.97	0.25	0.042	50.71	100.579		71.9199	0.283577	11.9416	2.68784	0.038736	0.0945003	0.741576	0.055825	2.62841	5.98686	0.25	0.042	96.6709	0.114733	96.5561	4.51948	101.076
Buffalo Canyon	buf94-617	33.67	0.17	6.34	1.84	0.05	0.055	0.52	0.05	2.14	4.53	0.22	0.042	50.46	100.087		72.0269	0.283577	11.9794	2.63065	0.06456	0.0911845	0.727584	0.055825	2.88451	5.45684	0.22	0.042	96.463	0.102102	96.3609	4.18563	100.547
Buffalo Canyon	buf94-617	33.37	0.16	6.34	2.05	0.07	0.069	0.59	0.05	1.31	5.44	0.2	0.025	51.27	100.944		71.3851	0.266896	11.9794	2.93088	0.090384	0.114395	0.825528	0.055825	1.76575	6.55302	0.2	0.025	96.1922	0.0898475	96.1024	5.44057	101.543
Buffalo Canyon	buf94-617	33.37	0.18	6.35	2.12	0.03	0.065	0.6	0.05	1.95	4.96	0.23	0.044	50.7	100.649		71.3851	0.300258	11.9983	3.03096	0.038736	0.107763	0.83952	0.055825	2.62841	5.97482	0.23	0.044	96.6337	0.106763	96.527	4.63107	101.158
Buffalo Canyon	buf94-617	33.51	0.19	6.44	2.13	0.02	0.06	0.59	0.07	2.13	4.88	0.2	0.037	50.77	101.027		71.6846	0.316939	12.1684	3.04526	0.025824	0.099474	0.825528	0.078155	2.87103	5.87845	0.2	0.037	97.2306	0.0925533	97.1381	4.36878	101.507
Tuff of Bully Creek
Bully Creek Fm	har02-72	33.56	0.133	6.89	1.951	0.074	0.057	0.423	0.046	2.812	3.807	0.219	0.051	52.083	102.106		71.7916	0.221857	13.0187	2.78934	0.0955488	0.0945003	0.591862	0.051359	3.79029	4.58591	0.219	0.051	97.3009	0.10371	97.1972	5.51622	102.713
Bully Creek Fm	har02-72	33.969	0.166	6.588	1.975	0.102	0.039	0.299	0	2.727	4.177	0.093	0.061	52.016	102.212		72.6665	0.276905	12.448	2.82366	0.131702	0.0646581	0.418361	0	3.67572	5.03161	0.093	0.061	97.6911	0.0529121	97.6382	5.13925	102.777
Bully Creek Fm	har02-72	33.533	0.141	6.393	1.995	0.086	0.022	0.318	0	2.074	5.673	0.082	0.067	51.703	102.087		71.7338	0.235202	12.0796	2.85225	0.111043	0.0364738	0.444946	0	2.79554	6.8337	0.082	0.067	97.2715	0.0496334	97.2219	5.46697	102.689
Bully Creek Fm	har02-72	33.172	0.168	6.756	2.013	0.104	0.065	0.431	0.057	1.906	5.152	0.209	0.057	52.347	102.437		70.9615	0.280241	12.7655	2.87799	0.134285	0.107763	0.603055	0.0636405	2.5691	6.2061	0.209	0.057	96.8352	0.100852	96.7343	6.40928	103.144
Bully Creek Fm	har02-72	34.204	0.148	6.505	2.016	0.091	0.026	0.314	0.072	1.152	3.517	0.197	0.069	53.381	101.692		73.1692	0.246879	12.2912	2.88228	0.117499	0.0431054	0.439349	0.080388	1.55278	4.23658	0.197	0.069	95.3252	0.0985054	95.2267	7.26714	102.494
Bully Creek Fm	har02-72	33.367	0.161	6.8	2.036	0.126	0.043	0.409	0.033	2.878	4.035	0.108	0.052	51.82	101.868		71.3787	0.268564	12.8486	2.91087	0.162691	0.0712897	0.572273	0.0368445	3.87926	4.86056	0.108	0.052	97.1496	0.0571986	97.0924	5.36633	102.459
Bully Creek Fm	har02-72	33.832	0.191	6.429	2.037	0.087	0.026	0.293	0	2.661	3.79	0.137	0.046	52.373	101.902		72.3734	0.318607	12.1476	2.9123	0.112334	0.0431054	0.409966	0	3.58676	4.56543	0.137	0.046	96.6525	0.0680563	96.5845	5.97604	102.561
Bully Creek Fm	har02-72	33.314	0.134	6.797	2.044	0.119	0.048	0.457	0.071	2.489	4.688	0.204	0.07	52.008	102.443		71.2653	0.223525	12.8429	2.92231	0.153653	0.0795792	0.639434	0.0792715	3.35492	5.64716	0.204	0.07	97.4821	0.101678	97.3804	5.68917	103.07
Bully Creek Fm	har02-72	33.346	0.117	6.853	2.046	0.096	0.043	0.45	0.1	2.658	4.433	0.081	0.064	51.157	101.444		71.3338	0.195168	12.9487	2.92517	0.123955	0.0712897	0.62964	0.11165	3.58272	5.33999	0.081	0.064	97.4071	0.0485359	97.3585	4.5899	101.948
Bully Creek Fm	har02-72	33.321	0.159	6.735	2.053	0.083	0.051	0.46	0.049	2.32	3.689	0.149	0.055	52.583	101.707		71.2803	0.265228	12.7258	2.93517	0.10717	0.0845529	0.643632	0.0547085	3.12713	4.44377	0.149	0.055	95.8714	0.0751382	95.7963	6.64339	102.44
Bully Creek Fm	har02-72	33.406	0.182	6.751	2.054	0.108	0.058	0.444	0.008	2.127	5.168	0.13	0.062	51.834	102.332		71.4621	0.303594	12.756	2.9366	0.13945	0.0961582	0.621245	0.008932	2.86698	6.22537	0.13	0.062	97.6085	0.0687165	97.5398	5.38502	102.925
Bully Creek Fm	har02-72	33.5938	0.149626	6.66098	2.04017	0.093984	0.0398737	0.384173	0.0459774	2.32506	4.42162	0.14758	0.0604912	52.2384	102.202		71.8638	0.249591	12.5859	2.91683	0.121352	0.0661066	0.537535	0.0513338	3.13395	5.32629	0.14758	0.0604912	97.0608	0.0757784	96.985	5.86261	102.848
Bully Creek Fm	har02-72	33.422	0.137	6.763	2.062	0.111	0.062	0.435	0.101	1.494	3.828	0.139	0.054	52.731	101.339		71.4963	0.22853	12.7787	2.94804	0.143323	0.10279	0.608652	0.112767	2.01376	4.61121	0.139	0.054	95.2371	0.0707022	95.1664	6.93796	102.104
Bully Creek Fm	har02-72	33.711	0.141	6.478	2.063	0.089	0.02	0.315	0	2.574	4.475	0.145	0.06	51.681	101.752		72.1146	0.235202	12.2402	2.94947	0.114917	0.033158	0.440748	0	3.46949	5.39058	0.145	0.06	97.1933	0.0745814	97.1187	5.20618	102.325
Bully Creek Fm	har02-72	33.682	0.144	6.917	2.069	0.093	0.045	0.426	0.059	2.877	4.244	0.158	0.043	51.511	102.268		72.0525	0.240206	13.0697	2.95805	0.120082	0.0746055	0.596059	0.0658735	3.87791	5.11232	0.158	0.043	98.3683	0.0762219	98.2921	4.46663	102.759
Bully Creek Fm	har02-72	33.742	0.13	6.492	2.082	0.085	0.029	0.318	0.009	2.261	5.091	0.147	0.047	51.725	102.158		72.1809	0.216853	12.2666	2.97664	0.109752	0.0480791	0.444946	0.0100485	3.0476	6.13262	0.147	0.047	97.6281	0.0724923	97.5556	5.17146	102.727
Bully Creek Fm	har02-72	33.247	0.148	6.801	2.087	0.1	0.05	0.43	0.015	2.15	5.013	0.181	0.053	51.516	101.791		71.122	0.246879	12.8505	2.98378	0.12912	0.082895	0.601656	0.0167475	2.89799	6.03866	0.181	0.053	97.2042	0.0881609	97.116	5.2531	102.369
Bully Creek Fm	har02-72	33.401	0.14	6.914	2.105	0.099	0.054	0.407	0.118	2.94	4.121	0.186	0.056	51.645	102.186		71.4514	0.233534	13.064	3.00952	0.127829	0.0895266	0.569474	0.131747	3.96283	4.96416	0.186	0.056	97.846	0.0909426	97.7551	4.97854	102.734
Bully Creek Fm	har02-72	33.936	0.14	6.44	2.125	0.092	0.016	0.324	0	2.445	4.823	0.182	0.052	51.807	102.382		72.5959	0.233534	12.1684	3.03811	0.11879	0.0265264	0.453341	0	3.29562	5.80979	0.182	0.052	97.974	0.0883565	97.8856	5.05214	102.938
Bully Creek Fm	har02-72	33.264	0.138	6.833	2.132	0.131	0.055	0.445	0.158	2.763	4.196	0.147	0.05	51.849	102.161		71.1583	0.230198	12.911	3.04812	0.169147	0.0911845	0.622644	0.176407	3.72425	5.0545	0.147	0.05	97.3828	0.0731687	97.3096	5.45162	102.761
Bully Creek Fm	har02-72	33.71	0.145	6.372	2.191	0.105	0.044	0.315	0	1.904	5.551	0.151	0.057	51.682	102.227		72.1124	0.241874	12.0399	3.13247	0.135576	0.0729476	0.440748	0	2.5664	6.68673	0.151	0.057	97.6371	0.0764313	97.5606	5.24333	102.804
Bully Creek Fm	har96-41	33.24	0.176	6.34	1.98	0.093	0.035	0.3	0.041	1.4	5.35	0.19	0.059	51.29	100.494		71.107	0.293586	11.9794	2.83081	0.120082	0.0580265	0.41976	0.0457765	1.88706	6.44461	0.19	0.059	95.4351	0.0933033	95.3418	5.78996	101.132
Bully Creek Fm	har96-41	32.7	0.143	6.75	2.03	0.097	0.043	0.43	0.122	1.14	5.02	0.25	0.073	51.82	100.618		69.9518	0.238538	12.7541	2.90229	0.125246	0.0712897	0.601656	0.136213	1.53661	6.04709	0.25	0.073	94.6879	0.121723	94.5662	6.80212	101.368
Bully Creek Fm	har96-41	32.5	0.157	6.64	2.04	0.075	0.039	0.37	0.149	2.84	4.56	0.21	0.052	50.84	100.472		69.524	0.261892	12.5463	2.91659	0.09684	0.0646581	0.517704	0.166358	3.82804	5.49298	0.21	0.052	95.6773	0.100146	95.5772	5.50056	101.078
Bully Creek Fm	har96-41	32.84	0.173	6.68	2.05	0.07	0.056	0.42	0.149	3	4.72	0.28	0.043	51.49	101.971		70.2513	0.288581	12.6219	2.93088	0.090384	0.0928424	0.587664	0.166358	4.0437	5.68571	0.28	0.043	97.0823	0.12759	96.9547	5.63714	102.592
Bully Creek Fm	har96-41	32.58	0.126	6.65	2.06	0.118	0.044	0.4	0.122	2.47	5.31	0.31	0.057	51.41	101.657		69.6951	0.210181	12.5652	2.94518	0.152362	0.0729476	0.55968	0.136213	3.32931	6.39643	0.31	0.057	96.4296	0.143379	96.2862	6.03594	102.322
Bully Creek Fm	har96-41	33.43	0.145	6.27	2.07	0.111	0.022	0.3	0.109	1.31	5.56	0.23	0.06	50.75	100.367		71.5135	0.241874	11.8472	2.95948	0.143323	0.0364738	0.41976	0.121699	1.76575	6.69758	0.23	0.06	96.0366	0.110371	95.9262	4.98963	100.916
Bully Creek Fm	har96-41	33.31	0.128	6.28	2.08	0.071	0.025	0.3	0.104	1.07	5.21	0.23	0.057	51.51	100.375		71.2568	0.213517	11.8661	2.97378	0.0916752	0.0414475	0.41976	0.116116	1.44225	6.27597	0.23	0.057	94.9843	0.109694	94.8746	6.18167	101.056
Bully Creek Fm	har96-41	32.62	0.149	6.65	2.08	0.09	0.049	0.4	0.114	2.73	4.83	0.24	0.062	51.88	101.894		69.7807	0.248547	12.5652	2.97378	0.116208	0.0812371	0.55968	0.127281	3.67977	5.81822	0.24	0.062	96.2526	0.115032	96.1376	6.46986	102.607
Bully Creek Fm	har96-41	33.45	0.17	6.33	2.08	0.085	0.018	0.31	0.069	1.11	5.31	0.13	0.045	51.39	100.497		71.5562	0.283577	11.9605	2.97378	0.109752	0.0298422	0.433752	0.0770385	1.49617	6.39643	0.13	0.045	95.4921	0.0648834	95.4272	5.69723	101.124
Bully Creek Fm	har96-41	32.96	0.106	6.63	2.08	0.122	0.044	0.4	0.154	2.73	4.83	0.26	0.061	51.9	102.277		70.508	0.176819	12.5274	2.97378	0.157526	0.0729476	0.55968	0.171941	3.67977	5.81822	0.26	0.061	96.9671	0.123228	96.8439	6.10608	102.95
Bully Creek Fm	har96-41	32.8	0.156	6.69	2.09	0.113	0.059	0.41	0.077	1.06	5.16	0.3	0.054	51.17	100.139		70.1658	0.260224	12.6408	2.98807	0.145906	0.0978161	0.573672	0.0859705	1.42877	6.21574	0.3	0.054	94.9567	0.138492	94.8182	5.97971	100.798
Bully Creek Fm	har96-41	32.77	0.167	6.64	2.09	0.119	0.049	0.41	0.137	2.18	5.27	0.31	0.053	51.11	101.305		70.1016	0.278573	12.5463	2.98807	0.153653	0.0812371	0.573672	0.152961	2.93842	6.34824	0.31	0.053	96.5257	0.142477	96.3832	5.5308	101.914
Bully Creek Fm	har96-41	32.52	0.149	6.64	2.1	0.103	0.052	0.4	0.129	1.63	5.42	0.2	0.07	50.68	100.093		69.5668	0.248547	12.5463	3.00237	0.132994	0.0862108	0.55968	0.144029	2.19708	6.52893	0.2	0.07	95.2829	0.0999941	95.1829	5.51768	100.701
Bully Creek Fm	har96-41	32.79	0.162	6.68	2.1	0.088	0.044	0.41	0.158	1.67	5.4	0.22	0.057	51.29	101.069		70.1444	0.270232	12.6219	3.00237	0.113626	0.0729476	0.573672	0.176407	2.25099	6.50484	0.22	0.057	96.0083	0.105484	95.9028	5.80571	101.709
Bully Creek Fm	har96-41	33.07	0.14	6.67	2.11	0.107	0.042	0.43	0.099	1.03	4.94	0.23	0.05	52.08	100.998		70.7433	0.233534	12.603	3.01667	0.138158	0.0696318	0.601656	0.110534	1.38834	5.95072	0.23	0.05	95.1356	0.108116	95.0274	6.71066	101.738
Bully Creek Fm	har96-41	33.35	0.119	6.35	2.11	0.088	0.029	0.29	0.052	1.25	5.46	0.19	0.056	50.4	99.744		71.3423	0.198504	11.9983	3.01667	0.113626	0.0480791	0.405768	0.058058	1.68488	6.57712	0.19	0.056	95.6893	0.0926268	95.5967	4.65944	100.256
Bully Creek Fm	har96-41	33.16	0.187	6.32	2.11	0.074	0.022	0.29	0.075	1.92	5.6	0.18	0.056	49.85	99.844		70.9359	0.311935	11.9416	3.01667	0.0955488	0.0364738	0.405768	0.0837375	2.58797	6.74576	0.18	0.056	96.3974	0.0884163	96.309	3.97069	100.28
Bully Creek Fm	har96-41	32.82	0.17	6.67	2.13	0.095	0.049	0.42	0.105	2.09	5.18	0.24	0.069	50.96	100.998		70.2085	0.283577	12.603	3.04526	0.122664	0.0812371	0.587664	0.117233	2.81711	6.23983	0.24	0.069	96.4151	0.116611	96.2985	5.28077	101.579
Bully Creek Fm	har96-41	32.69	0.157	6.65	2.13	0.065	0.057	0.41	0.172	1.59	4.51	0.19	0.066	51.15	99.837		69.9304	0.261892	12.5652	3.04526	0.083928	0.0945003	0.573672	0.192038	2.14316	5.43275	0.19	0.066	94.5788	0.0948816	94.4839	6.01603	100.5
Bully Creek Fm	har96-41	33.27	0.14	6.33	2.13	0.097	0.033	0.29	0.081	2.27	5.55	0.25	0.053	51.09	101.584		71.1712	0.233534	11.9605	3.04526	0.125246	0.0547107	0.405768	0.0904365	3.05973	6.68553	0.25	0.053	97.1349	0.117214	97.0177	5.1308	102.149
Bully Creek Fm	har96-41	33.29	0.153	6.26	2.14	0.111	0.016	0.29	0.088	2.48	5.13	0.22	0.063	51.03	101.271		71.214	0.255219	11.8283	3.05956	0.143323	0.0265264	0.405768	0.098252	3.34279	6.1796	0.22	0.063	96.8363	0.106837	96.7294	5.10303	101.832
Bully Creek Fm	har02-45	33.02	0.16	6.72	2.03	0.13	0.06	0.43	0.11	2.19	4.84		0.1	46.28	96.07		70.6364	0.266896	12.6974	2.90229	0.167856	0.099474	0.601656	0.122815	2.9519	5.83026	0	0.1	96.377	0.0225479	96.3544	-0.326188	96.0282
Bully Creek Fm	har02-45	33.69	0.16	6.34	2.04	0.14	0	0.31	0	1.68	5.25		0.07	46.52	96.2		72.0696	0.266896	11.9794	2.91659	0.180768	0	0.433752	0	2.26447	6.32415	0	0.07	96.5057	0.0157835	96.4899	-0.332427	96.1575
Bully Creek Fm	har02-45	33.73	0.13	6.35	2.1	0.13	0.03	0.3	0.01	2.08	5.32		0.03	46.74	96.95		72.1552	0.216853	11.9983	3.00237	0.167856	0.049737	0.41976	0.011165	2.80363	6.40847	0	0.03	97.2634	0.00676437	97.2566	-0.351238	96.9054
Bully Creek Fm	har02-45	33.66	0.22	6.48	2.11	0.12	0.03	0.29	0	2.13	5.03		0.07	46.78	96.92		72.0055	0.366982	12.244	3.01667	0.154944	0.049737	0.405768	0	2.87103	6.05914	0	0.07	97.2437	0.0157835	97.2279	-0.352664	96.8752
Bully Creek Fm	har02-45	33.01	0.19	6.76	2.11	0.08	0.05	0.43	0.14	1.82	5.29		0.07	46.3	96.25		70.615	0.316939	12.773	3.01667	0.103296	0.082895	0.601656	0.15631	2.45318	6.37233	0	0.07	96.5613	0.0157835	96.5455	-0.338698	96.2068
Bully Creek Fm	har02-45	33.71	0.14	6.4	2.11	0.1	0.03	0.34	0.04	2.01	5.03		0.04	46.69	96.64		72.1124	0.233534	12.0928	3.01667	0.12912	0.049737	0.475728	0.04466	2.70928	6.05914	0	0.04	96.9631	0.00901917	96.9541	-0.359616	96.5945
Bully Creek Fm	har02-45	33.29	0.13	6.8	2.13	0.07	0.06	0.42	0.11	2.23	4.47		0.07	46.59	96.37		71.214	0.216853	12.8486	3.04526	0.090384	0.099474	0.587664	0.122815	3.00582	5.38456	0	0.07	96.6854	0.0157835	96.6696	-0.343305	96.3263
Bully Creek Fm	har02-45	32.91	0.19	6.75	2.14	0.12	0.06	0.42	0.09	2.02	5.06		0	46.23	95.99		70.4011	0.316939	12.7541	3.05956	0.154944	0.099474	0.587664	0.100485	2.72276	6.09528	0	0	96.2923	0	96.2923	-0.346291	95.946
Bully Creek Fm	har02-45	33.1	0.15	6.78	2.22	0.09	0.04	0.4	0.09	1.95	5.44		0.04	46.48	96.78		70.8075	0.250215	12.8108	3.17393	0.116208	0.066316	0.55968	0.100485	2.62841	6.55302	0	0.04	97.1066	0.00901917	97.0976	-0.363549	96.734
Lough ash: Succor Cr.	suc95-854	33.42	0.165	6.83	2.16	0.111	0.054	0.44	0.091	1.09	3.83	0.155	0.055	51.73	100.131		71.4921	0.275236	12.9053	3.08815	0.143323	0.0895266	0.615648	0.101601	1.46921	4.61362	0.155	0.055	95.0037	0.0776645	94.926	5.8494	100.775
Lough ash: Succor Cr.	suc95-854	33.11	0.161	6.76	2.07	0.139	0.065	0.422	0.078	1.3	3.81	0.17	0.064	51.55	99.699		70.8289	0.268564	12.773	2.95948	0.179477	0.107763	0.590462	0.087087	1.75227	4.58953	0.17	0.064	94.3706	0.0860096	94.2846	6.0851	100.37
Lough ash: Succor Cr.	suc95-854	32.98	0.125	6.73	2.12	0.095	0.04	0.415	0.042	1.04	3.4	0.127	0.055	53.15	100.319		70.5508	0.208512	12.7163	3.03096	0.122664	0.066316	0.580668	0.046893	1.40182	4.09564	0.127	0.055	93.0026	0.065875	92.9367	8.29894	101.236
Lough ash: Succor Cr.	suc95-854	33.11	0.136	6.67	2.14	0.108	0.052	0.414	0.066	1.22	3.66	0.166	0.042	51.9	99.684		70.8289	0.226862	12.603	3.05956	0.13945	0.0862108	0.579269	0.073689	1.64444	4.40884	0.166	0.042	93.8582	0.0793649	93.7788	6.63719	100.416
Lough ash: Succor Cr.	suc95-854	33	0.148	6.74	2.17	0.107	0.047	0.405	0.086	1.39	3.69	0.211	0.066	52.2	100.26		70.5936	0.246879	12.7352	3.10245	0.138158	0.0779213	0.566676	0.096019	1.87358	4.44497	0.211	0.066	94.1525	0.103724	94.0488	6.98151	101.03
Lough ash: Succor Cr.	suc95-854	33.2	0.147	6.73	2.19	0.111	0.046	0.404	0.057	1.3	3.8	0.136	0.076	51.77	99.967		71.0214	0.245211	12.7163	3.13104	0.143323	0.0762634	0.565277	0.0636405	1.75227	4.57748	0.136	0.076	94.5043	0.0743996	94.4299	6.22309	100.653
Lough ash: Succor Cr.	suc95-854	32.79	0.148	6.72	2.12	0.11	0.05	0.401	0.075	1.14	3.4	0.188	0.056	52.06	99.258		70.1444	0.246879	12.6974	3.03096	0.142032	0.082895	0.561079	0.0837375	1.53661	4.09564	0.188	0.056	92.8656	0.0917847	92.7739	7.28859	100.062
Lough ash: Succor Cr.	suc95-854	32.9	0.151	6.75	2.1	0.103	0.061	0.398	0.062	1.02	3.49	0.187	0.055	52.45	99.727		70.3797	0.251883	12.7541	3.00237	0.132994	0.101132	0.556882	0.069223	1.37486	4.20405	0.187	0.055	93.0692	0.0911382	92.9781	7.58646	100.565
Lough ash: Succor Cr.	suc95-854	32.98	0.147	6.78	2.12	0.091	0.06	0.398	0.099	1.38	3.83	0.195	0.079	51.45	99.609		70.5508	0.245211	12.8108	3.03096	0.117499	0.099474	0.556882	0.110534	1.8601	4.61362	0.195	0.079	94.2699	0.0999181	94.17	6.11274	100.283
Lough ash: Succor Cr.	suc95-854	32.92	0.158	6.68	2.09	0.096	0.056	0.396	0.056	1.01	3.61	0.123	0.076	52.46	99.731		70.4225	0.26356	12.6219	2.98807	0.123955	0.0928424	0.554083	0.062524	1.36138	4.34861	0.123	0.076	93.0383	0.0689259	92.9694	7.60068	100.57
Lough ash: Succor Cr.	suc95-854	32.8	0.158	6.65	2.15	0.112	0.046	0.396	0.109	0.97	3.44	0.118	0.058	52.68	99.687		70.1658	0.26356	12.5652	3.07386	0.144614	0.0762634	0.554083	0.121699	1.30746	4.14382	0.118	0.058	92.5923	0.062762	92.5295	8.04606	100.576
Lough ash: Succor Cr.	suc95-854	33.56	0.152	6.38	2.17	0.086	0.033	0.31	0.028	1.11	3.65	0.154	0.05	52.55	100.233		71.7916	0.253551	12.055	3.10245	0.111043	0.0547107	0.433752	0.031262	1.49617	4.39679	0.154	0.05	93.9303	0.0761161	93.8542	7.17001	101.024
Lough ash: Succor Cr.	suc95-854	33.37	0.181	6.43	2.1	0.098	0.027	0.308	0.033	1.16	3.64	0.132	0.053	51.73	99.262		71.3851	0.301926	12.1495	3.00237	0.126538	0.0447633	0.430954	0.0368445	1.56356	4.38474	0.132	0.053	93.6113	0.0675293	93.5438	6.42688	99.9706
Lough ash: Succor Cr.	suc95-854	33.52	0.147	6.41	2.1	0.077	0.021	0.3	0	1.41	3.77	0.188	0.06	51.55	99.553		71.706	0.245211	12.1117	3.00237	0.0994224	0.0348159	0.41976	0	1.90054	4.54134	0.188	0.06	94.3091	0.0926866	94.2165	5.99746	100.214
Lough ash: Succor Cr.	suc95-854	33.39	0.128	6.37	2.15	0.084	0.027	0.298	0.035	1.27	3.66	0.142	0.06	51.45	99.064		71.4279	0.213517	12.0361	3.07386	0.108461	0.0447633	0.416962	0.0390775	1.71183	4.40884	0.142	0.06	93.6833	0.0733182	93.61	6.12962	99.7396
Lough ash: Succor Cr.	suc95-854	33.43	0.15	6.38	2.09	0.092	0.021	0.296	0.013	0.98	3.43	0.126	0.054	52.53	99.592		71.5135	0.250215	12.055	2.98807	0.11879	0.0348159	0.414163	0.0145145	1.32094	4.13178	0.126	0.054	93.0218	0.0652285	92.9565	7.45878	100.415
Lough ash: Succor Cr.	suc95-854	33.66	0.136	6.37	2.1	0.1	0.018	0.295	0.037	0.96	3.49	0.186	0.063	52.26	99.675		72.0055	0.226862	12.0361	3.00237	0.12912	0.0298422	0.412764	0.0413105	1.29398	4.20405	0.186	0.063	93.6309	0.092521	93.5384	6.89754	100.436
Lough ash: Succor Cr.	suc95-854	33.51	0.176	6.37	2.1	0.091	0.027	0.291	0.013	1.21	3.62	0.147	0.074	52.02	99.649		71.6846	0.293586	12.0361	3.00237	0.117499	0.0447633	0.407167	0.0145145	1.63096	4.36065	0.147	0.074	93.8132	0.0785802	93.7346	6.64751	100.382
Lough ash: Succor Cr.	suc95-854	33.43	0.129	6.36	2.05	0.085	0.027	0.283	0.009	1.03	3.5	0.126	0.055	52.59	99.674		71.5135	0.215185	12.0172	2.93088	0.109752	0.0447633	0.395974	0.0100485	1.38834	4.2161	0.126	0.055	93.0227	0.065454	92.9573	7.5502	100.507
Clarkia, ID
Clarkia 2c	clk96-01	33.33	0.13	6.69	2.03	0.093	0.005	0.869	0.155	2.8	3.06	0.271	0.045	50.64	100.118		71.2995	0.216853	12.6408	2.90229	0.120082	0.0082895	1.2159	0.173058	3.77412	3.68608	0.271	0.045	96.353	0.124252	96.2287	4.36932	100.598
Clarkia 2c	clk96-01	32.98	0.112	6.71	2.06	0.064	0	0.869	0.119	2.75	3.07	0.275	0.047	51.1	100.156		70.5508	0.186827	12.6785	2.94518	0.0826368	0	1.2159	0.132863	3.70673	3.69812	0.275	0.047	95.5196	0.126387	95.3932	5.35204	100.745
Clarkia 2c	clk96-01	33.41	0.098	6.76	2.07	0.057	0.006	0.876	0.081	2.95	2.94	0.246	0.039	50.98	100.513		71.4707	0.163474	12.773	2.95948	0.0735984	0.0099474	1.2257	0.0904365	3.97631	3.54152	0.246	0.039	96.5692	0.112373	96.4568	4.55713	101.014
Clarkia 2c	clk96-01	33.41	0.118	6.73	2.08	0.044	0.004	0.901	0.111	2.53	3.41	0.294	0.052	50.44	100.124		71.4707	0.196836	12.7163	2.97378	0.0568128	0.0066316	1.26068	0.123932	3.41019	4.10769	0.294	0.052	96.6695	0.135514	96.534	4.03255	100.567
Clarkia 2c	clk96-01	33.37	0.114	6.75	2.09	0.065	0	0.891	0.07	2.94	2.83	0.279	0.024	51.23	100.653		71.3851	0.190163	12.7541	2.98807	0.083928	0	1.24669	0.078155	3.96283	3.40902	0.279	0.024	96.4011	0.122885	96.2782	4.91556	101.194
Clarkia 2c	clk96-01	33.54	0.137	6.74	2.09	0.053	0	0.882	0.153	2.75	3.11	0.287	0.04	51.18	100.962		71.7488	0.22853	12.7352	2.98807	0.0684336	0	1.23409	0.170824	3.70673	3.74631	0.287	0.04	96.954	0.129861	96.8241	4.64894	101.473
Clarkia 2c	clk96-01	33.33	0.121	6.74	2.09	0.04	0	0.897	0.085	3.15	3	0.239	0.03	50.34	100.062		71.2995	0.20184	12.7352	2.98807	0.051648	0	1.25508	0.0949025	4.24589	3.6138	0.239	0.03	96.755	0.107396	96.6476	3.83509	100.483
Clarkia 2c	clk96-01	33.78	0.127	6.76	2.1	0.049	0.008	0.887	0.104	3.04	2.92	0.267	0.043	50.42	100.505		72.2622	0.211849	12.773	3.00237	0.0632688	0.0132632	1.24109	0.116116	4.09762	3.51743	0.267	0.043	97.6082	0.122117	97.4861	3.3901	100.876
Clarkia 2c	clk96-01	33.47	0.091	6.72	2.1	0.036	0.004	0.878	0.119	2.9	2.93	0.319	0.061	51.18	100.808		71.599	0.151797	12.6974	3.00237	0.0464832	0.0066316	1.2285	0.132863	3.90891	3.52948	0.319	0.061	96.6835	0.14807	96.5354	4.80051	101.336
Clarkia 2c	clk96-01	33.39	0.111	6.75	2.1	0.068	0.006	0.915	0.143	2.99	2.79	0.285	0.039	51.35	100.937		71.4279	0.185159	12.7541	3.00237	0.0878016	0.0099474	1.28027	0.159659	4.03022	3.36083	0.285	0.039	96.6223	0.128794	96.4935	4.99284	101.486
Clarkia 2c	clk96-01	33.34	0.113	6.69	2.11	0.042	0	0.875	0.134	3	2.75	0.27	0.051	51.52	100.895		71.3209	0.188495	12.6408	3.01667	0.0542304	0	1.2243	0.149611	4.0437	3.31265	0.27	0.051	96.2723	0.125184	96.1472	5.33522	101.482
Clarkia 2c	clk96-01	33.17	0.107	6.71	2.11	0.074	0.008	0.866	0.101	2.88	2.83	0.305	0.058	51.7	100.919		70.9573	0.178487	12.6785	3.01667	0.0955488	0.0132632	1.21171	0.112767	3.88195	3.40902	0.305	0.058	95.9182	0.141499	95.7767	5.77899	101.556
Clarkia 2c	clk96-01	33.12	0.089	6.69	2.11	0.042	0.005	0.879	0.088	2.87	2.96	0.186	0.056	50.74	99.835		70.8503	0.148461	12.6408	3.01667	0.0542304	0.0082895	1.2299	0.098252	3.86847	3.56562	0.186	0.056	95.7229	0.0909426	95.632	4.7223	100.354
Clarkia 2c	clk96-01	33.28	0.13	6.7	2.12	0.05	0.01	0.883	0.087	2.93	2.92	0.31	0.028	51.17	100.618		71.1926	0.216853	12.6596	3.03096	0.06456	0.016579	1.23549	0.0971355	3.94935	3.51743	0.31	0.028	96.3186	0.13684	96.1818	4.98468	101.166
Clarkia 2c	clk96-01	33.59	0.095	6.72	2.12	0.042	0	0.886	0.115	2.78	3.08	0.275	0.043	50.69	100.436		71.8557	0.158469	12.6974	3.03096	0.0542304	0	1.23969	0.128397	3.74716	3.71017	0.275	0.043	96.9403	0.125485	96.8148	4.06772	100.882
Clarkia 2c	clk96-01	33.31	0.1	6.76	2.12	0.035	0	0.884	0.129	2.81	2.78	0.293	0.049	51.58	100.85		71.2568	0.16681	12.773	3.03096	0.045192	0	1.23689	0.144029	3.7876	3.34879	0.293	0.049	96.132	0.134417	95.9976	5.4528	101.45
Clarkia 2c	clk96-01	33.59	0.157	6.78	2.13	0.084	0.001	0.88	0.113	2.86	2.98	0.225	0.045	50.68	100.525		71.8557	0.261892	12.8108	3.04526	0.108461	0.0016579	1.2313	0.126165	3.85499	3.58971	0.225	0.045	97.156	0.104883	97.0511	3.90199	100.953
Clarkia 2c	clk96-01	33.28	0.123	6.78	2.13	0.056	0	0.903	0.122	2.81	3.18	0.289	0.043	50.82	100.536		71.1926	0.205176	12.8108	3.04526	0.0723072	0	1.26348	0.136213	3.7876	3.83063	0.289	0.043	96.676	0.13138	96.5447	4.48411	101.029
Clarkia 2c	clk96-01	33.42	0.115	6.69	2.13	0.05	0.005	0.864	0.124	2.82	2.92	0.249	0.048	51.09	100.525		71.4921	0.191831	12.6408	3.04526	0.06456	0.0082895	1.20891	0.138446	3.80108	3.51743	0.249	0.048	96.4056	0.115665	96.29	4.75829	101.048
Clarkia 2c	clk96-01	33.18	0.113	6.64	2.14	0.054	0	0.867	0.096	2.94	2.83	0.235	0.041	51.55	100.686		70.9787	0.188495	12.5463	3.05956	0.0697248	0	1.21311	0.107184	3.96283	3.40902	0.235	0.041	95.8108	0.108192	95.7027	5.60019	101.303
Clarkia 2c	clk96-01	33.19	0.095	6.66	2.14	0.056	0.003	0.907	0.128	2.64	2.94	0.327	0.039	51.57	100.695		71	0.158469	12.5841	3.05956	0.0723072	0.0049737	1.26907	0.142912	3.55846	3.54152	0.327	0.039	95.7574	0.146478	95.6109	5.7135	101.324
Clarkia 2c	clk96-01	33.54	0.107	6.71	2.14	0.06	0.006	0.894	0.109	2.81	3.24	0.242	0.056	50.04	99.954		71.7488	0.178487	12.6785	3.05956	0.077472	0.0099474	1.25088	0.121699	3.7876	3.9029	0.242	0.056	97.1139	0.114522	96.9993	3.31782	100.317
Clarkia 2c	clk96-01	33.55	0.121	6.77	2.16	0.061	0.006	0.865	0.09	2.92	2.94	0.238	0.038	51.12	100.879		71.7702	0.20184	12.7919	3.08815	0.0787632	0.0099474	1.21031	0.100485	3.93587	3.54152	0.238	0.038	97.005	0.108779	96.8962	4.47452	101.371
Clarkia 2c	clk96-01	33.48	0.108	6.77	2.17	0.038	0.002	0.897	0.093	3.15	2.93	0.223	0.042	50.56	100.463		71.6204	0.180155	12.7919	3.10245	0.0490656	0.0033158	1.25508	0.103835	4.24589	3.52948	0.223	0.042	97.1466	0.103365	97.0432	3.8411	100.884
Clarkia 2c	clk96-01	33.37	0.134	6.74	2.17	0.029	0	0.878	0.122	2.91	2.89	0.29	0.037	51.15	100.72		71.3851	0.223525	12.7352	3.10245	0.0374448	0	1.2285	0.136213	3.92239	3.48129	0.29	0.037	96.5791	0.130448	96.4487	4.79909	101.248
Clarkia 2c	clk96-01	33.14	0.092	6.72	2.17	0.052	0	0.877	0.12	2.93	2.8	0.3	0.034	51.41	100.645		70.8931	0.153465	12.6974	3.10245	0.0671424	0	1.2271	0.13398	3.94935	3.37288	0.3	0.034	95.9309	0.133982	95.7969	5.44802	101.245
Clarkia 2c	clk96-01	33.46	0.123	6.65	2.18	0.055	0	0.876	0.128	3.04	2.83	0.288	0.032	51.42	101.082		71.5776	0.205176	12.5652	3.11675	0.071016	0	1.2257	0.142912	4.09762	3.40902	0.288	0.032	96.731	0.128478	96.6025	5.03329	101.636
Clarkia 2c	clk96-01	33.35	0.056	6.8	2.21	0.051	0	0.869	0.143	2.7	3.06	0.245	0.054	50.71	100.248		71.3423	0.0934136	12.8486	3.15964	0.0658512	0	1.2159	0.159659	3.63933	3.68608	0.245	0.054	96.5098	0.115334	96.3945	4.32908	100.724
Bully Creek 48	har02-48	33.247	0.13	6.49	2.176	0.041	0.003	0.797	0.084	1.964	4.428		0.005	46.29	95.655		71.122	0.216853	12.2629	3.11103	0.0529392	0.0049737	1.11516	0.093786	2.64728	5.33397	0	0.005	95.9658	0.0011274	95.9647	-0.354598	95.6101
Bully Creek 48	har02-48	33.134	0.108	6.609	2.114	0.065	0.006	0.924	0.1	1.685	4.395		0.084	46.176	95.4		70.8803	0.180155	12.4877	3.02239	0.083928	0.0099474	1.29286	0.11165	2.27121	5.29422	0	0.084	95.7183	0.0189402	95.6994	-0.342977	95.3564
Bully Creek 48	har02-48	32.383	0.101	6.425	2.077	0.048	0	0.844	0.102	1.443	4.556		0.101	45.044	93.124		69.2737	0.168478	12.14	2.96949	0.0619776	0	1.18092	0.113883	1.94502	5.48816	0	0.101	93.4427	0.0227734	93.4199	-0.338954	93.081
Bully Creek 48	har02-48	33.066	0.156	6.622	2.177	0.035	0.005	0.888	0.123	2.074	3.691		0.058	46.136	95.031		70.7348	0.260224	12.5123	3.11246	0.045192	0.0082895	1.24249	0.137329	2.79554	4.44618	0	0.058	95.3528	0.0130778	95.3397	-0.353401	94.9863
Bully Creek 48	har02-48	33.045	0.124	6.635	2.088	0.023	0	0.852	0.126	1.802	4.332		0.021	46.1	95.148		70.6899	0.206844	12.5368	2.98521	0.0296976	0	1.19212	0.140679	2.42892	5.21833	0	0.021	95.4495	0.00473506	95.4448	-0.340024	95.1047
Bully Creek 48	har02-48	33.221	0.087	6.473	2.075	0.082	0.005	0.823	0.115	2.042	4.407		0	46.239	95.569		71.0664	0.145125	12.2307	2.96663	0.105878	0.0082895	1.15154	0.128397	2.75241	5.30867	0	0	95.864	0	95.864	-0.338104	95.5259
Bully Creek 48	har02-48	33.198	0.115	6.592	2.092	0.039	0	0.798	0.138	2.063	4.129		0.038	46.262	95.464		71.0172	0.191831	12.4556	2.99093	0.0503568	0	1.11656	0.154077	2.78072	4.97379	0	0.038	95.769	0.00856821	95.7604	-0.339684	95.4208
Bully Creek 48	har02-48	33.308	0.057	6.617	2.09	0.076	0.001	0.89	0.112	1.595	4.977		0.131	46.404	96.258		71.2525	0.0950817	12.5028	2.98807	0.0981312	0.0016579	1.24529	0.125048	2.1499	5.99529	0	0.131	96.5848	0.0295378	96.5552	-0.340639	96.2146
Bully Creek 48	har02-48	33.213	0.115	6.513	2.072	0.049	0	0.838	0.099	1.655	4.132		0.073	46.068	94.827		71.0492	0.191831	12.3063	2.96234	0.0632688	0	1.17253	0.110534	2.23077	4.97741	0	0.073	95.1372	0.01646	95.1208	-0.336674	94.7841
Bully Creek 48	har02-48	33.633	0.126	6.624	2.186	0.028	0.01	0.883	0.094	2.38	3.755		0.138	46.863	96.72		71.9477	0.210181	12.516	3.12532	0.0361536	0.016579	1.23549	0.104951	3.208	4.52327	0	0.138	97.0617	0.0311161	97.0306	-0.355644	96.675
Bully Creek 48	har02-48	33.48	0.094	6.702	2.069	0.056	0.006	0.837	0.114	1.449	4.386		0.033	46.522	95.748		71.6204	0.156801	12.6634	2.95805	0.0723072	0.0099474	1.17113	0.127281	1.95311	5.28338	0	0.033	96.0488	0.00744081	96.0414	-0.336326	95.7051
Bully Creek 48	har02-48	33.472	0.112	6.513	2.207	0.045	0.003	0.874	0.1	1.693	4.467		0.045	46.503	96.034		71.6033	0.186827	12.3063	3.15535	0.058104	0.0049737	1.2229	0.11165	2.28199	5.38095	0	0.045	96.3574	0.0101466	96.3472	-0.358606	95.9886
Bully Creek 48	har02-48	33.085	0.131	6.591	2.178	0.067	0	0.844	0.143	2.203	3.333		0.009	46.087	94.671		70.7754	0.218521	12.4537	3.11389	0.0865104	0	1.18092	0.159659	2.96942	4.01493	0	0.009	94.982	0.00202931	94.98	-0.353687	94.6263
Bully Creek 48	har02-48	33.284	0.128	6.545	2.126	0.061	0.006	0.887	0.127	1.6	4.424		0.13	46.259	95.577		71.2011	0.213517	12.3668	3.03954	0.0787632	0.0099474	1.24109	0.141796	2.15664	5.32915	0	0.13	95.9084	0.0293123	95.879	-0.346011	95.533
Bully Creek 48	har02-48	33.628	0.105	6.604	2.082	0.052	0.008	0.85	0.091	2.02	4.164		0	46.778	96.382		71.937	0.17515	12.4783	2.97664	0.0671424	0.0132632	1.18932	0.101601	2.72276	5.01595	0	0	96.6771	0	96.6771	-0.338224	96.3389
Bully Creek 48	har02-48	33.149	0.142	6.536	2.166	0.055	0.003	0.878	0.101	2.356	3.716		0.005	46.254	95.361		70.9123	0.23687	12.3498	3.09673	0.071016	0.0049737	1.2285	0.112767	3.17565	4.47629	0	0.005	95.6699	0.0011274	95.6688	-0.352388	95.3164
Bully Creek 48	har02-48	33.308	0.124	6.546	2.122	0.074	0	0.834	0.134	2.091	3.881		0	46.352	95.466		71.2525	0.206844	12.3687	3.03382	0.0955488	0	1.16693	0.149611	2.81846	4.67505	0	0	95.7674	0	95.7674	-0.345264	95.4221
Bully Creek 48	har02-48	33.142	0.124	6.565	2.061	0.044	0	0.863	0.076	1.78	4.091		0.077	46.076	94.899		70.8974	0.206844	12.4046	2.94661	0.0568128	0	1.20751	0.084854	2.39926	4.92802	0	0.077	95.2088	0.0173619	95.1915	-0.335191	94.8563
Bully Creek 48	har02-48	33.321	0.083	7.067	2.184	0.041	0.01	0.839	0.109	2.008	4.083		0.019	46.826	96.59		71.2803	0.138452	13.3531	3.12246	0.0529392	0.016579	1.17393	0.121699	2.70658	4.91838	0	0.019	96.9034	0.0042841	96.8991	-0.354001	96.5451
Obliterator ash
Weiser, ID	for02-21	34.249	0.085	6.291	1.331	0.03	0.025	0.393		1.009	6.019		0.065	46.804	96.301		73.2655	0.141789	11.8868	1.90293	0.038736	0.0414475	0.549886	0	1.36003	7.25049	0	0.065	96.5026	0.0146561	96.488	-0.216688	96.2713
Weiser, ID	for02-21	34.275	0.089	6.101	1.339	0.038	0.019	0.418		0.967	6.052		0.08	46.664	96.042		73.3211	0.148461	11.5278	1.91437	0.0490656	0.0315001	0.584866	0	1.30342	7.29024	0	0.08	96.2508	0.0180383	96.2328	-0.221002	96.0118
Weiser, ID	for02-21	34.57	0.12	6.179	1.341	0.001	0.014	0.406		0.808	5.744		0.082	46.955	96.22		73.9521	0.200172	11.6752	1.91723	0.0012912	0.0232106	0.568075	0	1.0891	6.91922	0	0.082	96.4277	0.0184893	96.4092	-0.219209	96.19
Weiser, ID	for02-21	34.546	0.127	6.257	1.341	0	0.02	0.39		0.805	5.669		0.052	46.988	96.195		73.9008	0.211849	11.8226	1.91723	0	0.033158	0.545688	0	1.08506	6.82888	0	0.052	96.3973	0.0117249	96.3855	-0.22074	96.1648
Weiser, ID	for02-21	34.333	0.091	6.103	1.36	0.062	0.021	0.393		1.093	6.099		0.034	46.802	96.391		73.4452	0.151797	11.5316	1.94439	0.0800544	0.0348159	0.549886	0	1.47325	7.34686	0	0.034	96.5918	0.00766629	96.5842	-0.223671	96.3605
Huntington Creek	htc93-444	32.685	0.087	5.895	1.204	0.026	0.016	0.363	0.043	1.419	5.472	0.193	0.073	48.603	96.079		69.9198	0.145125	11.1386	1.72136	0.0335712	0.0265264	0.50791	0.0480095	1.91267	6.59157	0.193	0.073	92.3111	0.0977231	92.2134	4.34278	96.5562
Huntington Creek	htc93-444	32.63	0.098	5.895	1.224	0	0.027	0.368	0.035	1.276	5.593	0.166	0.067	49.475	96.854		69.8021	0.163474	11.1386	1.74995	0	0.0447633	0.514906	0.0390775	1.71992	6.73733	0.166	0.067	92.1431	0.0850018	92.0581	5.38932	97.4474
Huntington Creek	htc93-444	32.97	0.061	5.892	1.133	0.025	0.03	0.361	0.012	1.266	5.487	0.238	0.06	49.762	97.297		70.5294	0.101754	11.1329	1.61985	0.03228	0.049737	0.505111	0.013398	1.70644	6.60964	0.238	0.06	92.5986	0.113739	92.4848	5.40761	97.8924
Huntington Creek	htc93-444	32.643	0.093	5.886	1.196	0.015	0.018	0.381	0.029	1.32	5.539	0.235	0.065	49.247	96.667		69.8299	0.155133	11.1216	1.70992	0.019368	0.0298422	0.533095	0.0323785	1.77923	6.67228	0.235	0.065	92.1827	0.113604	92.0691	5.16655	97.2357
Huntington Creek	htc93-444	32.791	0.078	5.879	1.193	0.02	0.024	0.353	0	1.279	5.422	0.22	0.071	49.263	96.593		70.1465	0.130112	11.1084	1.70563	0.025824	0.0397896	0.493918	0	1.72396	6.53134	0.22	0.071	92.1965	0.108641	92.0878	5.06228	97.1501
Huntington Creek	htc93-444	32.747	0.042	5.879	1.21	0.017	0.02	0.365	0.013	1.313	5.575	0.224	0.061	49.16	96.626		70.0524	0.0700602	11.1084	1.72994	0.0219504	0.033158	0.510708	0.0145145	1.76979	6.71564	0.224	0.061	92.3115	0.10807	92.2034	4.96931	97.1728
Huntington Creek	htc93-444	32.925	0.08	5.871	1.216	0	0.017	0.378	0.068	1.331	5.463	0.245	0.065	49.13	96.789		70.4332	0.133448	11.0933	1.73852	0	0.0281843	0.528898	0.075922	1.79405	6.58073	0.245	0.065	92.7162	0.117814	92.5984	4.70839	97.3067
Huntington Creek	htc93-444	32.81	0.059	5.85	1.209	0.026	0.014	0.373	0.008	1.286	5.586	0.268	0.076	49.732	97.297		70.1872	0.0984179	11.0536	1.72851	0.0335712	0.0232106	0.521902	0.008932	1.7334	6.7289	0.268	0.076	92.4616	0.129979	92.3316	5.58003	97.9116
Huntington Creek	htc93-444	33.017	0.041	5.848	1.152	0.015	0.027	0.392	0.019	1.249	5.468	0.258	0.056	50.018	97.56		70.63	0.0683921	11.0498	1.64701	0.019368	0.0447633	0.548486	0.0212135	1.68353	6.58675	0.258	0.056	92.6133	0.121258	92.492	5.69539	98.1874
Huntington Creek	htc93-444	32.764	0.059	5.819	1.147	0.035	0.022	0.375	0	1.119	5.449	0.207	0.076	50.266	97.338		70.0887	0.0984179	10.995	1.63987	0.045192	0.0364738	0.5247	0	1.5083	6.56387	0.207	0.076	91.7836	0.104294	91.6793	6.36003	98.0393
Huntington Creek	htc93-444	32.487	0.07	5.741	1.179	0	0.03	0.371	0.026	1.382	5.478	0.233	0.064	49.747	96.808		69.4962	0.116767	10.8476	1.68562	0	0.049737	0.519103	0.029029	1.8628	6.5988	0.233	0.064	91.5027	0.112536	91.3901	6.08911	97.4792
White Bird 27
White Bird	cpb00-27	34.05	0.097	6.028	1.057	0.006	0.033	0.384	0	0.67	5.665	0.014	0.047	51.977	100.028		72.8398	0.161806	11.3899	1.51119	0.0077472	0.0547107	0.537293	0	0.903093	6.82406	0.014	0.047	94.2906	0.0164923	94.2741	6.4669	100.741
White Bird	cpb00-27	33.971	0.17	6.005	1.074	0.033	0.05	0.364	0.05	0.693	5.508	0.072	0.058	52.468	100.516		72.6708	0.283577	11.3464	1.5355	0.0426096	0.082895	0.509309	0.055825	0.934095	6.63494	0.072	0.058	94.226	0.0433936	94.1826	7.11886	101.301
White Bird	cpb00-27	34.014	0.162	5.99	1.109	0.01	0.035	0.36	0	0.859	5.909	0.156	0.06	51.999	100.663		72.7627	0.270232	11.3181	1.58554	0.012912	0.0580265	0.503712	0	1.15785	7.11798	0.156	0.06	95.0031	0.079213	94.9239	6.45022	101.374
White Bird	cpb00-27	33.161	0.174	6.199	1.257	0.031	0.075	0.463	0.004	1.06	6.081	0.139	0.048	51.179	99.871		70.938	0.290249	11.713	1.79713	0.0400272	0.124342	0.64783	0.004466	1.42877	7.32517	0.139	0.048	94.496	0.0693493	94.4267	6.11869	100.545
White Bird	cpb00-27	33.23	0.15	6.269	1.265	0.007	0.071	0.476	0.047	0.959	5.933	0.053	0.048	51.308	99.816		71.0856	0.250215	11.8453	1.80857	0.0090384	0.117711	0.666019	0.0524755	1.29264	7.14689	0.053	0.048	94.3754	0.0331388	94.3423	6.15169	100.494
White Bird	cpb00-27	33.367	0.196	6.248	1.274	0	0.085	0.451	0.04	0.659	5.503	0.1	0.072	51.885	99.88		71.3787	0.326948	11.8056	1.82144	0	0.140922	0.631039	0.04466	0.888266	6.62891	0.1	0.072	93.8385	0.0583398	93.7801	6.85615	100.636
White Bird	cpb00-27	33.272	0.146	6.314	1.276	0.039	0.078	0.473	0.036	0.887	5.996	0.171	0.05	51.896	100.634		71.1755	0.243543	11.9303	1.8243	0.0503568	0.129316	0.661822	0.040194	1.19559	7.22278	0.171	0.05	94.6947	0.083274	94.6114	6.76921	101.381
White Bird	cpb00-27	33.487	0.156	6.272	1.279	0	0.059	0.453	0.077	0.879	5.744	0.112	0.056	52.084	100.658		71.6354	0.260224	11.8509	1.82859	0	0.0978161	0.633838	0.0859705	1.1848	6.91922	0.112	0.056	94.6648	0.0597847	94.605	6.80336	101.408
White Bird	cpb00-27	33.331	0.146	6.188	1.285	0.011	0.061	0.447	0.035	1.007	6.068	0.116	0.056	51.595	100.346		71.3017	0.243543	11.6922	1.83716	0.0142032	0.101132	0.625442	0.0390775	1.35734	7.30951	0.116	0.056	94.6933	0.0614689	94.6318	6.4222	101.054
White Bird	cpb00-27	33.338	0.159	6.226	1.298	0.009	0.061	0.464	0.027	0.757	5.631	0.106	0.055	51.922	100.053		71.3166	0.265228	11.764	1.85575	0.0116208	0.101132	0.649229	0.0301455	1.02036	6.7831	0.106	0.055	93.9582	0.0570329	93.9012	6.91456	100.816
White Bird	cpb00-27	33.477	0.172	6.327	1.306	0.046	0.075	0.496	0.016	0.874	5.779	0.124	0.045	51.804	100.541		71.614	0.286913	11.9549	1.86719	0.0593952	0.124342	0.694003	0.017864	1.17806	6.96138	0.124	0.045	94.927	0.0623571	94.8647	6.37964	101.244
White Bird	cpb00-27	33.42	0.171	6.214	1.312	0.028	0.077	0.464	0.047	1.282	6.033	0.007	0.043	51.158	100.256		71.4921	0.285245	11.7414	1.87577	0.0361536	0.127658	0.649229	0.0524755	1.72801	7.26735	0.007	0.043	95.3053	0.012643	95.2927	5.57751	100.87
White Bird	cpb00-27	33.584	0.178	6.222	1.321	0.039	0.071	0.452	0.014	0.775	5.745	0.168	0.049	51.747	100.365		71.8429	0.296922	11.7565	1.88863	0.0503568	0.117711	0.632438	0.015631	1.04462	6.92043	0.168	0.049	94.7831	0.0817853	94.7013	6.3654	101.067
White Bird	cpb00-27	33.488	0.178	6.253	1.33	0.032	0.063	0.447	0.048	0.927	5.789	0.131	0.048	51.762	100.496		71.6375	0.296922	11.815	1.9015	0.0413184	0.104448	0.625442	0.053592	1.2495	6.97343	0.131	0.048	94.8777	0.0659809	94.8117	6.38854	101.2
White Bird	cpb00-27	33.31	0.194	6.224	1.335	0.012	0.074	0.456	0.029	1.096	6.18	0.146	0.051	51.645	100.752		71.2568	0.323611	11.7602	1.90865	0.0154944	0.122685	0.638035	0.0323785	1.4773	7.44443	0.146	0.051	95.1766	0.0729731	95.1036	6.34821	101.452
White Bird	cpb00-27	33.205	0.158	6.214	1.352	0.025	0.073	0.43	0.045	1.206	6.15	0.064	0.055	50.839	99.816		71.0321	0.26356	11.7414	1.93295	0.03228	0.121027	0.601656	0.0502425	1.62557	7.40829	0.064	0.055	94.9281	0.0393487	94.8887	5.53697	100.426
White Bird	cpb00-27	33.442	0.215	6.287	1.354	0.032	0.071	0.496	0.101	0.611	5.377	0.113	0.049	52.124	100.272		71.5391	0.358642	11.8793	1.93581	0.0413184	0.117711	0.694003	0.112767	0.823567	6.47713	0.113	0.049	94.1414	0.0586274	94.0827	6.95669	101.039
White Bird	cpb00-27	33.307	0.169	6.287	1.357	0.033	0.055	0.468	0.054	0.748	5.607	0.042	0.051	52.086	100.264		71.2503	0.281909	11.8793	1.9401	0.0426096	0.0911845	0.654826	0.060291	1.00823	6.75419	0.042	0.051	94.056	0.0291836	94.0268	7.01066	101.037
White Bird	cpb00-27	33.482	0.158	6.233	1.364	0.006	0.066	0.452	0.072	0.822	5.817	0.154	0.043	51.829	100.498		71.6247	0.26356	11.7773	1.95011	0.0077472	0.109421	0.632438	0.080388	1.10797	7.00716	0.154	0.043	94.7577	0.0745377	94.6832	6.53539	101.219
White Bird	cpb00-27	33.469	0.162	6.251	1.374	0.004	0.067	0.459	0.02	0.865	5.851	0.111	0.044	51.946	100.623		71.5969	0.270232	11.8113	1.96441	0.0051648	0.111079	0.642233	0.02233	1.16593	7.04811	0.111	0.044	94.7926	0.0566579	94.736	6.61665	101.353
White Bird	cpb00-27	33.493	0.16	6.284	1.392	0.039	0.068	0.469	0.038	0.889	5.865	0.165	0.052	51.799	100.713		71.6482	0.266896	11.8736	1.99014	0.0503568	0.112737	0.656225	0.042427	1.19828	7.06498	0.165	0.052	95.1209	0.0811986	95.0397	6.37622	101.416
Huntington Creek	htc93-447	33.53	0.15	5.89	1.17	0.05	0.049	0.38	0.04	1.46	5.55	0.21	0.047	50.54	99.066		71.7274	0.250215	11.1292	1.67275	0.06456	0.0812371	0.531696	0.04466	1.96793	6.68553	0.21	0.047	94.4121	0.0990186	94.3131	5.34084	99.6539
Huntington Creek	htc93-447	33.02	0.12	6.05	1.35	0.03	0.066	0.46	0.11	1.45	5.66	0.27	0.052	50.27	98.908		70.6364	0.200172	11.4315	1.9301	0.038736	0.109421	0.643632	0.122815	1.95446	6.81804	0.27	0.052	94.2072	0.125409	94.0818	5.4233	99.5051
Huntington Creek	htc93-447	33.05	0.19	6.06	1.35	0.01	0.066	0.46	0.1	1.48	5.95	0.2	0.048	50.15	99.114		70.7006	0.316939	11.4504	1.9301	0.012912	0.109421	0.643632	0.11165	1.99489	7.16737	0.2	0.048	94.6858	0.0950335	94.5908	5.08241	99.6732
Huntington Creek	htc93-447	33.47	0.15	6.08	1.34	0.03	0.067	0.48	0.08	1.51	5.87	0.19	0.06	49.63	98.957		71.599	0.250215	11.4882	1.9158	0.038736	0.111079	0.671616	0.08932	2.03533	7.071	0.19	0.06	95.5203	0.0935287	95.4268	3.96529	99.392
Huntington Creek	htc93-447	33.16	0.24	6.09	1.32	0.03	0.069	0.47	0.1	1.42	6.03	0.2	0.038	50.03	99.197		70.9359	0.400344	11.5071	1.8872	0.038736	0.114395	0.657624	0.11165	1.91402	7.26374	0.2	0.038	95.0686	0.0927787	94.9759	4.74258	99.7184
Huntington Creek	htc93-447	33.19	0.16	6.1	1.36	0	0.067	0.47	0.09	1.62	5.67	0.24	0.041	49.4	98.408		71	0.266896	11.5259	1.94439	0	0.111079	0.657624	0.100485	2.1836	6.83008	0.24	0.041	94.9012	0.110297	94.7909	4.0631	98.854
Huntington Creek	htc93-447	32.95	0.17	6.11	1.38	0	0.07	0.47	0.1	1.39	5.9	0.24	0.054	50.36	99.194		70.4866	0.283577	11.5448	1.97299	0	0.116053	0.657624	0.11165	1.87358	7.10714	0.24	0.054	94.4481	0.113229	94.3349	5.46035	99.7952
Huntington Creek	htc93-447	33.06	0.14	6.12	1.3	0.01	0.062	0.47	0.08	1.53	5.92	0.18	0.045	50.46	99.377		70.722	0.233534	11.5637	1.85861	0.012912	0.10279	0.657624	0.08932	2.06229	7.13123	0.18	0.045	94.659	0.085936	94.5731	5.39825	99.9713
Huntington Creek	htc93-447	32.86	0.18	6.12	1.4	0.01	0.064	0.48	0.1	1.63	5.57	0.21	0.031	50.74	99.395		70.2941	0.300258	11.5637	2.00158	0.012912	0.106106	0.671616	0.11165	2.19708	6.70962	0.21	0.031	94.2097	0.0954109	94.1143	5.93469	100.049
Huntington Creek	htc93-447	33.23	0.17	6.12	1.29	0.01	0.066	0.47	0.09	1.62	5.58	0.16	0.047	50.83	99.683		71.0856	0.283577	11.5637	1.84431	0.012912	0.109421	0.657624	0.100485	2.1836	6.72167	0.16	0.047	94.77	0.0779659	94.692	5.6087	100.301
Huntington Creek	htc93-447	33.18	0.15	6.13	1.33	0.03	0.053	0.46	0.09	1.47	5.84	0.21	0.053	50.07	99.066		70.9787	0.250215	11.5826	1.9015	0.038736	0.0878687	0.643632	0.100485	1.98141	7.03486	0.21	0.053	94.863	0.100371	94.7626	4.83509	99.5977
Huntington Creek	htc93-447	33.44	0.16	6.14	1.32	0.05	0.078	0.48	0.08	1.61	5.82	0.19	0.047	49.26	98.675		71.5348	0.266896	11.6015	1.8872	0.06456	0.129316	0.671616	0.08932	2.17012	7.01077	0.19	0.047	95.6632	0.0905975	95.5726	3.48398	99.0566
Huntington Creek	htc93-447	33.14	0.17	6.14	1.3	0.03	0.066	0.49	0.05	1.48	5.92	0.17	0.044	49.55	98.55		70.8931	0.283577	11.6015	1.85861	0.038736	0.109421	0.685608	0.055825	1.99489	7.13123	0.17	0.044	94.8665	0.0815	94.785	4.22942	99.0144
Huntington Creek	htc93-447	32.93	0.14	6.15	1.34	0	0.074	0.48	0.09	1.45	6.02	0.19	0.044	50.12	99.028		70.4439	0.233534	11.6204	1.9158	0	0.122685	0.671616	0.100485	1.95446	7.25169	0.19	0.044	94.5485	0.0899211	94.4586	5.13437	99.593
Huntington Creek	htc93-447	33.41	0.15	6.16	1.34	0.03	0.067	0.46	0.05	1.48	5.89	0.2	0.051	49.14	98.428		71.4707	0.250215	11.6393	1.9158	0.038736	0.111079	0.643632	0.055825	1.99489	7.09509	0.2	0.051	95.4663	0.09571	95.3706	3.4334	98.804
Huntington Creek	htc93-447	33.27	0.19	6.16	1.33	0.04	0.065	0.48	0.1	1.5	5.7	0.19	0.056	50.24	99.321		71.1712	0.316939	11.6393	1.9015	0.051648	0.107763	0.671616	0.11165	2.02185	6.86622	0.19	0.056	95.1057	0.0926268	95.0131	4.84022	99.8533
Huntington Creek	htc93-447	33	0.2	6.16	1.31	0.02	0.073	0.47	0.09	1.43	5.95	0.19	0.054	49.5	98.447		70.5936	0.33362	11.6393	1.87291	0.025824	0.121027	0.657624	0.100485	1.9275	7.16737	0.19	0.054	94.6833	0.0921759	94.5911	4.33171	98.9228
Huntington Creek	htc93-447	33.29	0.2	6.19	1.31	0.01	0.063	0.44	0.04	1.68	5.63	0.2	0.052	50.21	99.315		71.214	0.33362	11.696	1.87291	0.012912	0.104448	0.615648	0.04466	2.26447	6.7819	0.2	0.052	95.1925	0.0959354	95.0966	4.73951	99.8361
Huntington Creek	htc93-447	33.26	0.17	6.21	1.37	0.03	0.076	0.46	0.09	1.5	5.91	0.21	0.043	50.04	99.369		71.1498	0.283577	11.7338	1.95869	0.038736	0.126	0.643632	0.100485	2.02185	7.11919	0.21	0.043	95.4287	0.0981167	95.3306	4.53694	99.8676
Huntington Creek	htc93-447	33.62	0.14	6.23	1.37	0.04	0.065	0.47	0.08	1.56	5.76	0.22	0.04	50.37	99.965		71.9199	0.233534	11.7716	1.95869	0.051648	0.107763	0.657624	0.08932	2.10272	6.9385	0.22	0.04	96.0913	0.101651	95.9896	4.46601	100.456
Cougar Point VII
Sentinal Gap	cpb96-06	34.2	0.18	6.13	1.22	0.02	0.066	0.43	0.17	1.63	5.27	0.3	0.015	50.83	100.461		73.1606	0.300258	11.5826	1.74423	0.025824	0.109421	0.601656	0.189805	2.19708	6.34824	0.3	0.015	96.5748	0.129698	96.4451	4.51156	100.957
Sentinal Gap	cpb96-06	34.16	0.14	6.08	1.23	0.03	0.067	0.43	0.12	1.96	4.94	0.31	0.024	50.9	100.391		73.0751	0.233534	11.4882	1.75853	0.038736	0.111079	0.601656	0.13398	2.64188	5.95072	0.31	0.024	96.3674	0.135938	96.2314	4.67325	100.905
Sentinal Gap	cpb96-06	34.5	0.16	6.05	1.24	0.01	0.058	0.45	0.11	1.26	5.63	0.21	0.013	50.96	100.651		73.8024	0.266896	11.4315	1.77283	0.012912	0.0961582	0.62964	0.122815	1.69835	6.7819	0.21	0.013	96.8384	0.0913523	96.747	4.38559	101.133
Sentinal Gap	cpb96-06	34.34	0.15	6.02	1.25	0.03	0.068	0.45	0.16	1.73	5.15	0.21	0.024	51.06	100.642		73.4601	0.250215	11.3748	1.78713	0.038736	0.112737	0.62964	0.17864	2.33187	6.20369	0.21	0.024	96.6016	0.0938326	96.5077	4.64471	101.152
Sentinal Gap	cpb96-06	33.84	0.13	6.07	1.25	0.04	0.063	0.44	0.14	1.56	5.4	0.18	0.025	49.94	99.078		72.3905	0.216853	11.4693	1.78713	0.051648	0.104448	0.615648	0.15631	2.10272	6.50484	0.18	0.025	95.6044	0.0814265	95.523	3.99314	99.5161
Sentinal Gap	cpb96-06	34.1	0.2	6.19	1.26	0.03	0.042	0.43	0.11	1.46	5.34	0.22	0.026	51.11	100.518		72.9467	0.33362	11.696	1.80142	0.038736	0.0696318	0.601656	0.122815	1.96793	6.43256	0.22	0.026	96.2571	0.098494	96.1586	4.89801	101.057
Sentinal Gap	cpb96-06	34.35	0.15	6.1	1.28	0.02	0.058	0.46	0.14	1.89	4.98	0.29	0.03	50.58	100.328		73.4815	0.250215	11.5259	1.83002	0.025824	0.0961582	0.643632	0.15631	2.54753	5.99891	0.29	0.03	96.8761	0.12887	96.7472	4.02208	100.769
Sentinal Gap	cpb96-06	34.33	0.16	6.05	1.29	0.02	0.056	0.45	0.13	1.55	5.27	0.25	0.017	51.08	100.653		73.4387	0.266896	11.4315	1.84431	0.025824	0.0928424	0.62964	0.145145	2.08925	6.34824	0.25	0.017	96.5794	0.109096	96.4703	4.69924	101.17
Sentinal Gap	cpb96-06	34.2	0.21	6.07	1.29	0.05	0.061	0.42	0.09	1.94	5.07	0.23	0.019	49.97	99.62		73.1606	0.350301	11.4693	1.84431	0.06456	0.101132	0.587664	0.100485	2.61493	6.10732	0.23	0.019	96.6496	0.101126	96.5485	3.44917	99.9977
Sentinal Gap	cpb96-06	33.8	0.2	6.13	1.43	0.03	0.1	0.57	0.12	1.93	4.83	0.15	0.019	51.64	100.949		72.305	0.33362	11.5826	2.04447	0.038736	0.16579	0.797544	0.13398	2.60145	5.81822	0.15	0.019	95.9904	0.067442	95.923	5.64806	101.571
Sentinal Gap	cpb96-06	33.76	0.19	6.17	1.44	0.03	0.089	0.59	0.12	1.68	5.24	0.16	0.03	50.48	99.979		72.2194	0.316939	11.6582	2.05877	0.038736	0.147553	0.825528	0.13398	2.26447	6.3121	0.16	0.03	96.1657	0.0741328	96.0916	4.36711	100.459
Sentinal Gap	cpb96-06	33.83	0.2	6.16	1.45	0.01	0.071	0.55	0.16	2.05	4.92	0.23	0.034	50.85	100.515		72.3691	0.33362	11.6393	2.07306	0.012912	0.117711	0.76956	0.17864	2.7632	5.92663	0.23	0.034	96.4478	0.104508	96.3433	4.68692	101.03
Sentinal Gap	cpb96-06	33.74	0.2	6.19	1.45	0.01	0.08	0.55	0.1	2	4.67	0.21	0.027	51.33	100.557		72.1766	0.33362	11.696	2.07306	0.012912	0.132632	0.76956	0.11165	2.6958	5.62548	0.21	0.027	95.8643	0.094509	95.7698	5.37935	101.149
Sentinal Gap	cpb96-06	33.77	0.19	6.11	1.46	0.03	0.076	0.55	0.13	1.94	4.84	0.27	0.019	51.59	100.975		72.2408	0.316939	11.5448	2.08736	0.038736	0.126	0.76956	0.145145	2.61493	5.83026	0.27	0.019	96.0036	0.117968	95.8856	5.71935	101.605
Sentinal Gap	cpb96-06	33.79	0.22	6.11	1.46	0.02	0.082	0.58	0.11	1.74	5.1	0.21	0.039	50.53	99.991		72.2836	0.366982	11.5448	2.08736	0.025824	0.135948	0.811536	0.122815	2.34535	6.14346	0.21	0.039	96.1167	0.0972147	96.0195	4.46172	100.481
Sentinal Gap	cpb96-06	34.05	0.21	6.15	1.47	0.01	0.084	0.57	0.14	1.95	4.78	0.22	0.019	50.79	100.443		72.8398	0.350301	11.6204	2.10166	0.012912	0.139264	0.797544	0.15631	2.62841	5.75799	0.22	0.019	96.6436	0.0969157	96.5467	4.37711	100.924
Sentinal Gap	cpb96-06	33.75	0.19	6.14	1.47	0.01	0.07	0.58	0.16	1.81	5.05	0.22	0.031	50.9	100.381		72.198	0.316939	11.6015	2.10166	0.012912	0.116053	0.811536	0.17864	2.4397	6.08323	0.22	0.031	96.1112	0.0996214	96.0116	4.90934	100.921
Sentinal Gap	cpb96-06	33.97	0.22	6.24	1.47	0.02	0.081	0.56	0.08	2.05	4.82	0.21	0.018	50.96	100.699		72.6686	0.366982	11.7905	2.10166	0.025824	0.13429	0.783552	0.08932	2.7632	5.80617	0.21	0.018	96.7581	0.0924797	96.6656	4.53129	101.197
Sentinal Gap	cpb96-06	34.12	0.2	6.16	1.51	0	0.091	0.55	0.1	1.98	4.7	0.22	0.015	51.2	100.846		72.9895	0.33362	11.6393	2.15885	0	0.150869	0.76956	0.11165	2.66884	5.66162	0.22	0.015	96.7188	0.0960138	96.6228	4.7448	101.368
Sentinal Gap	cpb96-06	34.01	0.19	6.12	1.51	0.01	0.079	0.54	0.14	1.92	5.02	0.31	0.032	50.91	100.791		72.7542	0.316939	11.5637	2.15885	0.012912	0.130974	0.755568	0.15631	2.58797	6.04709	0.31	0.032	96.8265	0.137742	96.6888	4.60868	101.297
Sentinal Gap	cpb96-06	33.89	0.18	6.14	1.52	0.03	0.097	0.62	0.12	1.74	4.96	0.29	0.017	51.65	101.254		72.4975	0.300258	11.6015	2.17314	0.038736	0.160816	0.867504	0.13398	2.34535	5.97482	0.29	0.017	96.4006	0.125938	96.2747	5.59546	101.87
Sentinal Gap	cpb96-06	33.52	0.22	6.2	1.64	0.06	0.095	0.62	0.13	1.97	4.79	0.23	0.03	49.73	99.235		71.706	0.366982	11.7149	2.34471	0.077472	0.1575	0.867504	0.145145	2.65536	5.77003	0.23	0.03	96.0656	0.103606	95.962	3.67592	99.6379
Ninemile Canyon	cpb98-12	33.684	0.116	5.802	1.275	0.02	0.021	0.385	0.005	1.623	5.204	0.0828975	0.062	52.348	100.628		72.0568	0.1935	10.9629	1.82287	0.025824	0.0348159	0.538692	0.0055825	2.18764	6.26874	0.0828975	0.062	94.2423	0.0488839	94.1934	7.23268	101.426
Ninemile Canyon	cpb98-12	33.54	0.15	5.988	1.302	0.027	0.049	0.432	0.065	1.814	4.97	0.0641118	0.023	51.986	100.41		71.7488	0.250215	11.3143	1.86147	0.0348624	0.0812371	0.604454	0.0725725	2.44509	5.98686	0.0641118	0.023	94.487	0.0321805	94.4548	6.69357	101.148
Ninemile Canyon	cpb98-12	33.325	0.21	6.041	1.584	0.032	0.096	0.552	0.033	1.94	4.637	0.0179056	0.023	51.835	100.326		71.2888	0.350301	11.4145	2.26464	0.0413184	0.159158	0.772358	0.0368445	2.61493	5.58573	0.0179056	0.023	94.5695	0.0127252	94.5568	6.48415	101.041
Ninemile Canyon	cpb98-12	33.557	0.15	6.014	1.28	0.015	0.06	0.453	0.044	1.878	4.861	0.066752	0.024	51.844	100.247		71.7851	0.250215	11.3635	1.83002	0.019368	0.099474	0.633838	0.049126	2.53136	5.85556	0.066752	0.024	94.5083	0.0335176	94.4748	6.48732	100.962
Ninemile Canyon	cpb98-12	33.674	0.093	5.985	1.331	0.05	0.037	0.411	0	1.859	5.111	0.0162679	0.033	52.187	100.787		72.0354	0.155133	11.3087	1.90293	0.06456	0.0613423	0.575071	0	2.50575	6.15671	0.0162679	0.033	94.8148	0.0142905	94.8005	6.72888	101.529
Ninemile Canyon	cpb98-12	33.616	0.19	5.915	1.239	0.016	0.052	0.475	0.111	1.867	5.071	0.0269451	0.019	52.163	100.761		71.9113	0.316939	11.1764	1.7714	0.0206592	0.0862108	0.66462	0.123932	2.51653	6.10853	0.0269451	0.019	94.7425	0.0156294	94.7269	6.78215	101.509
Ninemile Canyon	cpb98-12	33.825	0.121	5.892	1.306	0.026	0.035	0.393	0.046	1.921	5.149	0.138995	0.054	51.567	100.474		72.3584	0.20184	11.1329	1.86719	0.0335712	0.0580265	0.549886	0.051359	2.58932	6.20249	0.138995	0.054	95.238	0.0707003	95.1673	5.96378	101.131
Ninemile Canyon	cpb98-12	33.473	0.127	6.007	1.248	0.05	0.049	0.448	0.03	1.771	5.066	0.0016832	0.034	51.78	100.085		71.6054	0.211849	11.3502	1.78427	0.06456	0.0812371	0.626842	0.033495	2.38713	6.1025	0.0016832	0.034	94.2832	0.00837501	94.2749	6.5299	100.805
Ninemile Canyon	cpb98-12	33.27	0.197	6.022	1.491	0.026	0.072	0.59	0.019	1.927	4.776	0.0136119	0.033	51.903	100.34		71.1712	0.328616	11.3786	2.13168	0.0335712	0.119369	0.825528	0.0212135	2.5974	5.75317	0.0136119	0.033	94.4069	0.0131721	94.3937	6.68299	101.077
Ninemile Canyon	cpb98-12	34.077	0.09	5.931	1.223	0.004	0.022	0.358	0	2.039	4.941	0.0274107	0.042	51.543	100.297		72.8975	0.150129	11.2066	1.74852	0.0051648	0.0364738	0.500914	0	2.74837	5.95193	0.0274107	0.042	95.3151	0.0210115	95.294	5.62257	100.917
Ninemile Canyon	cpb98-12	33.937	0.13	5.969	1.219	0.007	0.043	0.405	0.017	1.736	5.201	0.0115271	0.022	51.719	100.417		72.598	0.216853	11.2784	1.7428	0.0090384	0.0712897	0.566676	0.0189805	2.33995	6.26512	0.0115271	0.022	95.1407	0.00981406	95.1309	5.94012	101.071
Ninemile Canyon	cpb98-12	33.438	0.168	5.939	1.318	0.037	0.048	0.45	0.039	1.791	5.159	0.0576462	0.023	51.912	100.38		71.5306	0.280241	11.2217	1.88434	0.0477744	0.0795792	0.62964	0.0435435	2.41409	6.21453	0.0576462	0.023	94.4267	0.0294581	94.3972	6.72405	101.121
Ninemile Canyon	cpb98-12	33.99	0.106	5.899	1.288	0.039	0.028	0.387	0	1.721	5.181	0.0475192	0.037	51.438	100.162		72.7114	0.176819	11.1462	1.84145	0.0503568	0.0464212	0.54149	0	2.31974	6.24103	0.0475192	0.037	95.1594	0.0283508	95.131	5.65306	100.784
Ninemile Canyon	cpb98-12	33.847	0.162	5.886	1.126	0.059	0.04	0.391	0.012	1.716	5.114	0.0792334	0.029	51.193	99.6542		72.4055	0.270232	11.1216	1.60984	0.0761808	0.066316	0.547087	0.013398	2.313	6.16032	0.0792334	0.029	94.6917	0.0399003	94.6518	5.62154	100.273
Ninemile Canyon	cpb98-12	33.641	0.153	5.913	1.235	0.013	0.056	0.444	0.01	1.798	4.948	0.0700615	0.023	51.822	100.126		71.9648	0.255219	11.1726	1.76568	0.0167856	0.0928424	0.621245	0.011165	2.42352	5.96036	0.0700615	0.023	94.3773	0.0346856	94.3426	6.5002	100.843
Ninemile Canyon	cpb98-12	33.808	0.094	5.868	1.258	0.045	0.02	0.379	0	1.615	5.034	0.0513922	0.053	51.269	99.4944		72.3221	0.156801	11.0876	1.79856	0.058104	0.033158	0.530297	0	2.17686	6.06396	0.0513922	0.053	94.3318	0.0335892	94.2982	5.83954	100.138
Ninemile Canyon	cpb98-12	33.506	0.2	5.899	1.264	0.02	0.056	0.461	0.061	1.623	5.108	0.0792176	0.024	51.766	100.067		71.676	0.33362	11.1462	1.80714	0.025824	0.0928424	0.645031	0.0681065	2.18764	6.1531	0.0792176	0.024	94.2387	0.0387663	94.2	6.59451	100.794
Ninemile Canyon	cpb98-12	33.827	0.127	5.926	1.3	0.037	0.018	0.4	0	1.653	5.152	0.04417	0.054	52.136	100.674		72.3627	0.211849	11.1972	1.85861	0.0477744	0.0298422	0.55968	0	2.22808	6.2061	0.04417	0.054	94.8	0.0307738	94.7692	6.63687	101.406
Ninemile Canyon	cpb98-12	33.59	0.163	5.912	1.258	0.031	0.043	0.457	0.025	1.885	5.024	0.0743922	0.021	51.863	100.346		71.8557	0.2719	11.1707	1.79856	0.0400272	0.0712897	0.639434	0.0279125	2.54079	6.05191	0.0743922	0.021	94.5637	0.0360581	94.5276	6.53997	101.068
Ninemile Canyon	cpb98-12	33.552	0.188	6.001	1.36	0.052	0.058	0.465	0.064	1.726	4.994	0.036424	0.023	51.762	100.281		71.7744	0.313603	11.3389	1.94439	0.0671424	0.0961582	0.650628	0.071456	2.32648	6.01577	0.036424	0.023	94.6584	0.0205224	94.6379	6.34284	100.981
Ninemile Canyon	cpb98-12	33.362	0.174	5.876	1.318	0.03	0.038	0.44	0.073	1.62	5.05	0.0416462	0.04	51.858	99.9206		71.368	0.290249	11.1027	1.88434	0.038736	0.0630002	0.615648	0.0815045	2.1836	6.08323	0.0416462	0.04	93.7926	0.0265544	93.7661	6.91773	100.684
The Butte	cpb98-13	32.93	0.21	5.997	1.467	0.019	0.075	0.534	0.059	1.782	4.904	0.0193103	0.034	51.535	99.5653		70.4439	0.350301	11.3313	2.09737	0.0245328	0.124342	0.747173	0.0658735	2.40196	5.90736	0.0193103	0.034	93.5474	0.0157969	93.5316	6.78183	100.313
The Butte	cpb98-13	33.362	0.156	5.914	1.1	0.009	0.053	0.419	0.026	1.468	5.37	0	0.014	51.539	99.43		71.368	0.260224	11.1745	1.57267	0.0116208	0.0878687	0.586265	0.029029	1.97872	6.4687	0	0.014	93.5516	0.00315671	93.5484	6.61063	100.159
The Butte	cpb98-13	33.328	0.116	5.881	1.211	0.031	0.065	0.426	0.055	1.9	4.895	0.0677599	0.053	51.555	99.5838		71.2953	0.1935	11.1121	1.73137	0.0400272	0.107763	0.596059	0.0614075	2.56101	5.89652	0.0677599	0.053	93.7158	0.0404809	93.6753	6.64086	100.316
The Butte	cpb98-13	33.177	0.156	5.99	1.514	0.017	0.078	0.586	0.002	1.947	4.608	0.0779426	0.019	51.517	99.6889		70.9722	0.260224	11.3181	2.16457	0.0219504	0.129316	0.819931	0.002233	2.62436	5.5508	0.0779426	0.019	93.9607	0.037102	93.9236	6.47997	100.404
The Butte	cpb98-13	33.145	0.166	5.876	1.226	0.007	0.052	0.429	0.024	1.65	5.182	0.0703234	0.042	51.742	99.6113		70.9038	0.276905	11.1027	1.75281	0.0090384	0.0862108	0.600257	0.026796	2.22404	6.24224	0.0703234	0.042	93.3371	0.03908	93.298	7.09637	100.394
The Butte	cpb98-13	33.339	0.174	5.856	1.302	0.032	0.065	0.425	0.009	1.655	5.169	0.0121118	0.037	51.669	99.7441		71.3188	0.290249	11.0649	1.86147	0.0413184	0.107763	0.59466	0.0100485	2.23077	6.22658	0.0121118	0.037	93.7957	0.0134424	93.7822	6.70099	100.483
The Butte	cpb98-13	32.93	0.159	6.044	1.481	0.021	0.077	0.576	0.051	1.997	4.51	0.0359029	0.019	51.409	99.3099		70.4439	0.265228	11.4201	2.11739	0.0271152	0.127658	0.805939	0.0569415	2.69176	5.43275	0.0359029	0.019	93.4437	0.0194011	93.4243	6.61529	100.04
The Butte	cpb98-13	32.99	0.172	6.064	1.485	0.03	0.07	0.556	0.06	1.951	4.87	0.0267865	0.019	51.531	99.8248		70.5722	0.286913	11.4579	2.1231	0.038736	0.116053	0.777955	0.06699	2.62975	5.8664	0.0267865	0.019	93.9818	0.0155626	93.9663	6.58474	100.551
The Butte	cpb98-13	32.765	0.159	5.996	1.539	0.046	0.083	0.559	0.033	1.856	4.839	0.0592151	0.034	51.708	99.6762		70.0909	0.265228	11.3294	2.20031	0.0593952	0.137606	0.782153	0.0368445	2.5017	5.82906	0.0592151	0.034	93.3258	0.032599	93.2932	7.1748	100.468
The Butte	cpb98-13	32.738	0.207	6.037	1.676	0.018	0.086	0.614	0.032	1.994	4.488	0.0062284	0.025	51.315	99.2362		70.0331	0.345297	11.4069	2.39618	0.0232416	0.142579	0.859109	0.035728	2.68771	5.40624	0.0062284	0.025	93.3674	0.00825946	93.3591	6.60574	99.9648
The Butte	cpb98-13	33.111	0.143	5.975	1.285	0.029	0.055	0.46	0.036	1.796	5.302	0.0596065	0.017	51.637	99.9056		70.8311	0.238538	11.2898	1.83716	0.0374448	0.0911845	0.643632	0.040194	2.42083	6.38679	0.0596065	0.017	93.8932	0.0289306	93.8643	6.7904	100.655
The Butte	cpb98-13	33.058	0.193	6.052	1.529	0.028	0.076	0.572	0.011	2.122	4.563	0.0495061	0.017	51.491	99.7615		70.7177	0.321943	11.4353	2.18601	0.0361536	0.126	0.800342	0.0122815	2.86024	5.49659	0.0495061	0.017	94.059	0.0246778	94.0343	6.43701	100.471
The Butte	cpb98-13	32.829	0.213	6.06	1.426	0.024	0.075	0.562	0.05	1.588	4.962	0.0775034	0.023	51.397	99.2865		70.2278	0.355305	11.4504	2.03875	0.0309888	0.124342	0.78635	0.055825	2.14047	5.97723	0.0775034	0.023	93.2879	0.037819	93.2501	6.78488	100.035
The Butte	cpb98-13	33.1	0.197	6.025	1.491	0.035	0.078	0.575	0.047	1.895	4.692	0.0076119	0.023	51.409	99.5746		70.8075	0.328616	11.3842	2.13168	0.045192	0.129316	0.80454	0.0524755	2.55427	5.65198	0.0076119	0.023	93.9204	0.00839103	93.9121	6.36429	100.276
The Butte	cpb98-13	33.314	0.191	6.058	1.522	0.052	0.081	0.548	0.038	1.931	4.75	0.11471	0.018	51.485	100.103		71.2653	0.318607	11.4466	2.176	0.0671424	0.13429	0.766762	0.042427	2.60279	5.72185	0.11471	0.018	94.6745	0.0523575	94.6221	6.15952	100.782
The Butte	cpb98-13	33.131	0.204	6.08	1.525	0.023	0.091	0.597	0.045	2.036	4.568	0.0516225	0.031	51.539	99.9216		70.8738	0.340292	11.4882	2.18029	0.0296976	0.150869	0.835322	0.0502425	2.74432	5.50261	0.0516225	0.031	94.2783	0.0287256	94.2495	6.37499	100.625
The Butte	cpb98-13	33.689	0.177	5.954	1.296	0.014	0.064	0.447	0.07	1.661	5.021	0.113286	0.022	51.673	100.201		72.0675	0.295254	11.2501	1.85289	0.0180768	0.106106	0.625442	0.078155	2.23886	6.0483	0.113286	0.022	94.716	0.0526601	94.6633	6.22404	100.887
The Butte	cpb98-13	33.354	0.181	5.901	1.354	0.015	0.044	0.451	0.046	1.451	5.312	0.0505986	0.014	51.83	100.004		71.3509	0.301926	11.1499	1.93581	0.019368	0.0729476	0.631039	0.051359	1.9558	6.39884	0.0505986	0.014	93.9325	0.0244614	93.908	6.85134	100.759
The Butte	cpb98-13	33.09	0.163	5.984	1.52	0.001	0.074	0.571	0.051	2.047	4.659	0.106768	0.017	51.344	99.6278		70.7861	0.2719	11.3068	2.17314	0.0012912	0.122685	0.798943	0.0569415	2.75915	5.61223	0.106768	0.017	94.013	0.0487881	93.9642	6.36547	100.33
Rock Creek	cpb00-25	33.8	0.23	6.25	1.71	0.05	0.08	0.69	0.02	1.77	5.04	0.17	0.05	50.27	100.13		72.305	0.383663	11.8094	2.44479	0.06456	0.132632	0.965448	0.02233	2.38578	6.07118	0.17	0.05	96.8047	0.0828529	96.7219	3.8279	100.55
Rock Creek	cpb00-25	33.85	0.19	6.17	1.54	0.04	0.07	0.56	0.04	1.81	5.03	0.13	0.08	51.67	101.18		72.4119	0.316939	11.6582	2.20174	0.051648	0.116053	0.783552	0.04466	2.4397	6.05914	0.13	0.08	96.2936	0.0727752	96.2208	5.57287	101.794
Rock Creek	cpb00-25	33.44	0.23	6.16	1.67	0.01	0.1	0.66	0.03	1.76	5.02	0.11	0.05	50.92	100.16		71.5348	0.383663	11.6393	2.3876	0.012912	0.16579	0.923472	0.033495	2.3723	6.04709	0.11	0.05	95.6605	0.0575897	95.6029	5.12054	100.723
Rock Creek	cpb00-25	33.99	0.19	6.16	1.48	0.05	0.08	0.58	0.01	1.77	5.03	0.19	0.05	51.68	101.26		72.7114	0.316939	11.6393	2.11596	0.06456	0.132632	0.811536	0.011165	2.38578	6.05914	0.19	0.05	96.4884	0.091274	96.3972	5.46444	101.862
Rock Creek	cpb00-25	33.84	0.17	6.16	1.58	0	0.09	0.56	0.02	1.98	4.94	0.21	0.06	52	101.61		72.3905	0.283577	11.6393	2.25893	0	0.149211	0.783552	0.02233	2.66884	5.95072	0.21	0.06	96.417	0.10195	96.3151	5.95057	102.266
Rock Creek	cpb00-25	33.8	0.19	6.12	1.54	0.03	0.09	0.61	0.02	1.92	5	0.16	0.05	50.75	100.28		72.305	0.316939	11.5637	2.20174	0.038736	0.149211	0.853512	0.02233	2.58797	6.023	0.16	0.05	96.2721	0.0786424	96.1935	4.5911	100.785
Rock Creek	cpb00-25	33.77	0.23	6.12	1.49	0	0.08	0.56	0.02	1.72	4.94	0.14	0.09	51.84	101		72.2408	0.383663	11.5637	2.13025	0	0.132632	0.783552	0.02233	2.31839	5.95072	0.14	0.09	95.7561	0.0792405	95.6768	5.98236	101.659
Rock Creek	cpb00-25	33.96	0.12	6.12	1.32	0.02	0.05	0.45	0.03	1.82	4.9	0.12	0.05	51.63	100.59		72.6472	0.200172	11.5637	1.8872	0.025824	0.082895	0.62964	0.033495	2.45318	5.90254	0.12	0.05	95.5959	0.0618003	95.5341	5.68164	101.216
Rock Creek	cpb00-25	33.7	0.2	6.11	1.59	0.01	0.08	0.57	0.03	1.71	5.3	0.15	0.06	51.39	100.9		72.091	0.33362	11.5448	2.27322	0.012912	0.132632	0.797544	0.033495	2.30491	6.38438	0.15	0.06	96.1186	0.0766866	96.0419	5.45911	101.501
Rock Creek	cpb00-25	33.32	0.19	6.1	1.58	0.01	0.08	0.58	0.02	1.75	5.03	0.09	0.05	51.45	100.25		71.2781	0.316939	11.5259	2.25893	0.012912	0.132632	0.811536	0.02233	2.35883	6.05914	0.09	0.05	94.9173	0.0491687	94.8682	6.04841	100.917
Rock Creek	cpb00-25	33.63	0.21	6.09	1.56	0.05	0.08	0.57	0.01	1.64	5.21	0.15	0.09	51.26	100.55		71.9413	0.350301	11.5071	2.23033	0.06456	0.132632	0.797544	0.011165	2.21056	6.27597	0.15	0.09	95.7614	0.083451	95.678	5.47484	101.153
Rock Creek	cpb00-25	33.8	0.24	6.08	1.57	0.03	0.07	0.58	0.02	1.6	5.29	0.12	0.05	50.56	100.01		72.305	0.400344	11.4882	2.24463	0.038736	0.116053	0.811536	0.02233	2.15664	6.37233	0.12	0.05	96.1257	0.0618003	96.0639	4.43309	100.497
Rock Creek	cpb00-25	33.8	0.19	6.08	1.58	0.01	0.07	0.59	0.01	1.78	4.97	0.15	0.03	51.12	100.38		72.305	0.316939	11.4882	2.25893	0.012912	0.116053	0.825528	0.011165	2.39926	5.98686	0.15	0.03	95.9008	0.0699223	95.8308	5.11158	100.942
Rock Creek	cpb00-25	33.37	0.2	6.07	1.56	0.07	0.07	0.57	0.04	1.82	4.93	0.1	0.13	51.83	100.76		71.3851	0.33362	11.4693	2.23033	0.090384	0.116053	0.797544	0.04466	2.45318	5.93868	0.1	0.13	95.0888	0.0714176	95.0174	6.45427	101.472
Rock Creek	cpb00-25	33.79	0.19	6.06	1.53	0.05	0.08	0.55	0.03	1.8	4.99	0.1	0.06	51.84	101.07		72.2836	0.316939	11.4504	2.18744	0.06456	0.132632	0.76956	0.033495	2.42622	6.01095	0.1	0.06	95.8357	0.055634	95.7801	5.94491	101.725
Rock Creek	cpb00-25	33.56	0.18	6.06	1.5	0.02	0.08	0.58	0.03	1.7	5.41	0.15	0.04	51.14	100.45		71.7916	0.300258	11.4504	2.14455	0.025824	0.132632	0.811536	0.033495	2.29143	6.51689	0.15	0.04	95.6885	0.0721771	95.6164	5.43164	101.048
Rock Creek	cpb00-25	33.65	0.2	6.05	1.55	0.02	0.08	0.56	0.03	1.56	5.18	0.05	0.03	51.81	100.77		71.9841	0.33362	11.4315	2.21604	0.025824	0.132632	0.783552	0.033495	2.10272	6.23983	0.05	0.03	95.3633	0.027817	95.3354	6.10766	101.443
Rock Creek	cpb00-25	33.19	0.21	6.04	1.5	0.03	0.07	0.57	0.03	1.48	4.96	0.03	0.06	51.76	99.93		71	0.350301	11.4126	2.14455	0.038736	0.116053	0.797544	0.033495	1.99489	5.97482	0.03	0.06	93.953	0.0261603	93.9269	6.74742	100.674
Rock Creek	cpb00-25	34.32	0.18	5.98	1.37	0.04	0.05	0.45	0.02	1.6	5.48	0.05	0.01	50.8	100.35		73.4173	0.300258	11.2992	1.95869	0.051648	0.082895	0.62964	0.02233	2.15664	6.60121	0.05	0.01	96.5799	0.0233074	96.5566	4.26131	100.818
Rock Creek	cpb00-25	34.16	0.16	5.93	1.27	0.03	0.06	0.45	0.03	1.47	5.42	0.11	0.07	51.16	100.32		73.0751	0.266896	11.2047	1.81572	0.038736	0.099474	0.62964	0.033495	1.98141	6.52893	0.11	0.07	95.8541	0.0620993	95.792	5.08771	100.88
Rock Creek	cpb00-25	34.26	0.16	5.92	1.29	0	0.04	0.41	0.02	1.76	5.24	0.07	0.03	51.58	100.78		73.289	0.266896	11.1858	1.84431	0	0.066316	0.573672	0.02233	2.3723	6.3121	0.07	0.03	96.0328	0.0362381	95.9965	5.37513	101.372
Wenas Lake	ell99-01	33.657	0.129	5.843	1.23	0.038	0.052	0.398	0	1.543	5.168	0.19	0.013	50.246	98.507		71.9991	0.215185	11.0403	1.75853	0.0490656	0.0862108	0.556882	0	2.07981	6.22537	0.19	0.013	94.2135	0.0829312	94.1305	4.91737	99.0479
Wenas Lake	ell99-01	33.57	0.177	5.84	1.236	0	0.061	0.458	0.019	1.425	5.173	0.182	0.031	50.932	99.104		71.8129	0.295254	11.0347	1.76711	0	0.101132	0.640834	0.0212135	1.92076	6.2314	0.182	0.031	94.0383	0.0836214	93.9547	5.78681	99.7415
Wenas Lake	ell99-01	33.629	0.171	5.89	1.238	0	0.066	0.462	0.033	1.813	4.855	0.185	0.022	51.301	99.665		71.9392	0.285245	11.1292	1.76997	0	0.109421	0.64643	0.0368445	2.44374	5.84833	0.185	0.022	94.4153	0.0828553	94.3324	5.99298	100.325
Wenas Lake	ell99-01	33.471	0.175	5.922	1.264	0.055	0.048	0.474	0.069	1.609	5.317	0.152	0.023	50.13	98.709		71.6012	0.291917	11.1896	1.80714	0.071016	0.0795792	0.663221	0.0770385	2.16877	6.40486	0.152	0.023	94.5293	0.069186	94.4601	4.7738	99.2339
Wenas Lake	ell99-01	33.493	0.152	5.943	1.319	0.029	0.059	0.458	0.059	1.976	4.799	0.227	0.027	51.325	99.866		71.6482	0.253551	11.2293	1.88577	0.0374448	0.0978161	0.640834	0.0658735	2.66345	5.78088	0.227	0.027	94.5571	0.101667	94.4555	6.0807	100.536
Wenas Lake	ell99-01	33.642	0.12	5.834	1.333	0.009	0.019	0.382	0.039	1.638	5.344	0.205	0.055	50.033	98.653		71.967	0.200172	11.0233	1.90579	0.0116208	0.0315001	0.534494	0.0435435	2.20786	6.43738	0.205	0.055	94.6227	0.0987171	94.524	4.63899	99.1629
Wenas Lake	ell99-01	33.429	0.176	5.8	1.36	0.019	0.049	0.46	0.054	1.508	5.217	0.162	0.028	50.331	98.593		71.5113	0.293586	10.9591	1.94439	0.0245328	0.0812371	0.643632	0.060291	2.03263	6.2844	0.162	0.028	94.0251	0.0745239	93.9506	5.21655	99.1671
Wenas Lake	ell99-01	33.32	0.155	5.851	1.375	0.044	0.059	0.484	0.045	1.621	5.054	0.181	0.02	51.216	99.425		71.2781	0.258555	11.0555	1.96584	0.0568128	0.0978161	0.677213	0.0502425	2.18495	6.08805	0.181	0.02	93.9141	0.0807201	93.8334	6.28447	100.118
Wenas Lake	ell99-01	33.53	0.21	6.022	1.466	0.008	0.084	0.608	0.044	1.848	4.668	0.173	0.018	50.504	99.183		71.7274	0.350301	11.3786	2.09594	0.0103296	0.139264	0.850714	0.049126	2.49092	5.62307	0.173	0.018	94.9066	0.0769007	94.8297	4.8913	99.721
Wenas Lake	ell99-01	33.231	0.186	5.909	1.499	0.04	0.07	0.604	0.049	2.02	4.565	0.172	0.025	50.953	99.323		71.0878	0.310267	11.1651	2.14312	0.051648	0.116053	0.845117	0.0547085	2.72276	5.499	0.172	0.025	94.1925	0.078058	94.1144	5.85356	99.968
Wenas Lake	ell99-01	33.391	0.243	6.063	1.511	0.013	0.092	0.6	0.045	1.954	4.527	0.202	0.026	51.166	99.833		71.43	0.405348	11.456	2.16028	0.0167856	0.152527	0.83952	0.0502425	2.6338	5.45322	0.202	0.026	94.8258	0.0909151	94.7349	5.72926	100.464
Wenas Lake	ell99-01	33.105	0.228	6.016	1.514	0.053	0.095	0.599	0.05	1.722	4.909	0.207	0.019	51.284	99.801		70.8182	0.380327	11.3672	2.16457	0.0684336	0.1575	0.838121	0.055825	2.32108	5.91338	0.207	0.019	94.3107	0.091442	94.2192	6.27336	100.493
Wenas Lake	ell99-01	33.239	0.217	5.987	1.52	0.024	0.089	0.602	0.046	1.378	5.271	0.157	0.01	51.205	99.745		71.1049	0.361978	11.3124	2.17314	0.0309888	0.147553	0.842318	0.051359	1.85741	6.34945	0.157	0.01	94.3985	0.0683601	94.3301	6.08556	100.416
Wenas Lake	ell99-01	32.996	0.233	5.975	1.556	0.026	0.07	0.605	0.053	1.63	5.121	0.189	0.022	50.955	99.431		70.585	0.388667	11.2898	2.22461	0.0335712	0.116053	0.846516	0.0591745	2.19708	6.16876	0.189	0.022	94.1202	0.0845395	94.0357	6.06361	100.099
Wenas Lake	ell99-01	33.019	0.17	5.915	1.592	0.048	0.077	0.61	0.007	1.655	5.192	0.147	0.018	50.482	98.932		70.6342	0.283577	11.1764	2.27608	0.0619776	0.127658	0.853512	0.0078155	2.23077	6.25428	0.147	0.018	94.0713	0.0659534	94.0054	5.53636	99.5417
Wenas Lake	ell99-01	33.022	0.208	5.942	1.618	0.017	0.093	0.62	0.029	1.704	5.088	0.249	0.028	50.463	99.081		70.6407	0.346965	11.2274	2.31325	0.0219504	0.154185	0.867504	0.0323785	2.29682	6.129	0.249	0.028	94.3071	0.111156	94.196	5.48954	99.6855
Highway 24	ell99-03	33.442	0.132	6.009	1.114	0.022	0.061	0.43	0.033	1.71	4.746	0.161	0.037	50.791	98.688		71.5391	0.220189	11.354	1.59269	0.0284064	0.101132	0.601656	0.0368445	2.30491	5.71703	0.161	0.037	93.694	0.0761322	93.6179	5.6978	99.3157
Highway 24	ell99-03	33.803	0.135	5.937	1.246	0.016	0.046	0.408	0	1.851	5.033	0.244	0.026	50.525	99.27		72.3114	0.225193	11.218	1.78141	0.0206592	0.0762634	0.570874	0	2.49496	6.06275	0.244	0.026	95.0314	0.108599	94.9229	4.88436	99.8072
Highway 24	ell99-03	33.881	0.149	5.867	1.264	0.026	0.056	0.4	0.015	1.815	4.935	0.207	0.016	50.491	99.122		72.4782	0.248547	11.0857	1.80714	0.0335712	0.0928424	0.55968	0.0167475	2.44644	5.9447	0.207	0.016	94.9366	0.0907656	94.8458	4.8045	99.6503
Highway 24	ell99-03	33.435	0.157	5.875	1.276	0	0.059	0.471	0.049	1.552	5.406	0.134	0.022	50.689	99.125		71.5242	0.261892	11.1008	1.8243	0	0.0978161	0.659023	0.0547085	2.09194	6.51207	0.134	0.022	94.2827	0.0613816	94.2213	5.51046	99.7318
Highway 24	ell99-03	33.817	0.102	5.983	1.317	0.018	0.022	0.419	0.006	2.063	4.826	0.243	0.037	51.139	99.992		72.3413	0.170146	11.3049	1.88291	0.0232416	0.0364738	0.586265	0.006699	2.78072	5.8134	0.243	0.037	95.2261	0.110659	95.1154	5.47999	100.595
Highway 24	ell99-03	33.5	0.114	5.906	1.318	0.011	0.052	0.452	0.052	1.743	5.024	0.204	0.029	51.404	99.809		71.6632	0.190163	11.1594	1.88434	0.0142032	0.0862108	0.632438	0.058058	2.34939	6.05191	0.204	0.029	94.3223	0.0924336	94.2299	6.27036	100.5
Highway 24	ell99-03	33.483	0.222	6.047	1.455	0	0.08	0.592	0.085	1.846	4.687	0.179	0.023	50.892	99.591		71.6268	0.370318	11.4258	2.08021	0	0.132632	0.828326	0.0949025	2.48822	5.64596	0.179	0.023	94.8952	0.0805544	94.8147	5.36722	100.182
Highway 24	ell99-03	33.251	0.228	6	1.467	0.012	0.091	0.582	0.087	1.945	4.723	0.203	0.03	51.601	100.22		71.1305	0.380327	11.337	2.09737	0.0154944	0.150869	0.814334	0.0971355	2.62167	5.68933	0.203	0.03	94.5671	0.0922381	94.4748	6.4572	100.932
Highway 24	ell99-03	33.235	0.183	5.973	1.483	0.009	0.068	0.601	0.033	1.968	4.787	0.182	0.016	51.045	99.583		71.0963	0.305262	11.286	2.12025	0.0116208	0.112737	0.840919	0.0368445	2.65267	5.76642	0.182	0.016	94.427	0.0802392	94.3468	5.88465	100.231
Highway 24	ell99-03	33.337	0.199	6.136	1.483	0.012	0.085	0.602	0.05	2.03	4.646	0.21	0.03	50.39	99.21		71.3145	0.331952	11.594	2.12025	0.0154944	0.140922	0.842318	0.055825	2.73624	5.59657	0.21	0.03	94.988	0.0951854	94.8929	4.85064	99.7435
Highway 24	ell99-03	33.119	0.179	6.074	1.516	0.028	0.072	0.565	0.081	1.973	4.713	0.206	0.021	49.928	98.475		70.8482	0.29859	11.4768	2.16743	0.0361536	0.119369	0.790548	0.0904365	2.65941	5.67728	0.206	0.021	94.3912	0.0914719	94.2997	4.69107	98.9908
Highway 24	ell99-03	33.08	0.205	5.984	1.532	0.032	0.07	0.574	0.085	1.835	5.111	0.115	0.025	50.827	99.475		70.7647	0.34196	11.3068	2.1903	0.0413184	0.116053	0.803141	0.0949025	2.4734	6.15671	0.115	0.025	94.4293	0.054058	94.3752	5.73111	100.106
Highway 24	ell99-03	33.161	0.196	6.163	1.55	0.034	0.097	0.678	0.004	2.005	4.729	0.216	0.022	51.03	99.885		70.938	0.326948	11.645	2.21604	0.0439008	0.160816	0.948658	0.004466	2.70254	5.69655	0.216	0.022	94.9209	0.0959079	94.825	5.68638	100.511
Highway 24	ell99-03	33.128	0.168	6.018	1.58	0.008	0.086	0.617	0.048	1.963	4.603	0.209	0.023	50.646	99.097		70.8674	0.280241	11.371	2.25893	0.0103296	0.142579	0.863306	0.053592	2.64593	5.54477	0.209	0.023	94.2701	0.093186	94.1769	5.52899	99.7059
Highway 24	ell99-03	33.292	0.214	6.082	1.581	0.022	0.074	0.605	0.014	1.954	4.688	0.176	0.017	51.642	100.361		71.2182	0.356973	11.4919	2.26036	0.0284064	0.122685	0.846516	0.015631	2.6338	5.64716	0.176	0.017	94.8147	0.0779384	94.7368	6.32113	101.058
Highway 24	ell99-03	33.382	0.164	6.129	1.586	0.028	0.083	0.595	0.052	2.141	4.605	0.204	0.03	50.766	99.765		71.4108	0.273568	11.5807	2.2675	0.0361536	0.137606	0.832524	0.058058	2.88585	5.54718	0.204	0.03	95.264	0.0926591	95.1713	5.16175	100.333
Highway 24	ell99-03	32.894	0.23	6.059	1.641	0.013	0.097	0.666	0.086	1.934	4.498	0.189	0.032	51.346	99.685		70.3668	0.383663	11.4485	2.34614	0.0167856	0.160816	0.931867	0.096019	2.60684	5.41829	0.189	0.032	93.9967	0.0867943	93.9099	6.49086	100.401
Highway 24	ell99-03	32.939	0.206	6.152	1.647	0.033	0.097	0.662	0.075	2.156	4.549	0.165	0.024	51.013	99.718		70.4631	0.343629	11.6242	2.35472	0.0426096	0.160816	0.92627	0.0837375	2.90607	5.47973	0.165	0.024	94.5739	0.0748852	94.499	5.86528	100.364
Highway 24	ell99-03	33.038	0.246	6.103	1.659	0.011	0.088	0.665	0.062	2.027	4.5	0.173	0.02	51.242	99.834		70.6749	0.410353	11.5316	2.37187	0.0142032	0.145895	0.930468	0.069223	2.73219	5.4207	0.173	0.02	94.4944	0.0773517	94.4171	6.08796	100.505
Highway 24	ell99-03	32.861	0.186	5.987	1.669	0.035	0.091	0.697	0.111	2.295	4.483	0.176	0.023	50.625	99.239		70.2963	0.310267	11.3124	2.38617	0.045192	0.150869	0.975242	0.123932	3.09343	5.40022	0.176	0.023	94.293	0.0792913	94.2137	5.64737	99.8611
Highway 24	ell99-03	32.642	0.192	5.98	1.715	0	0.09	0.696	0.066	1.921	4.902	0.159	0.019	50.005	98.387		69.8278	0.320275	11.2992	2.45194	0	0.149211	0.973843	0.073689	2.58932	5.90495	0.159	0.019	93.7682	0.0712315	93.697	5.27023	98.9672
Konnowoc Pass	ell99-05	33.84	0.16	5.89	1.19	0.03	0.05	0.4	0.02	1.66	5.23	0.17	0.02	51.02	99.68		72.3905	0.266896	11.1292	1.70134	0.038736	0.082895	0.55968	0.02233	2.23751	6.30006	0.17	0.02	94.9191	0.0760885	94.843	5.43537	100.278
Konnowoc Pass	ell99-05	33.65	0.17	5.85	1.2	0.01	0.06	0.42	0.09	1.62	5.34	0.16	0.03	50.34	98.94		71.9841	0.283577	11.0536	1.71564	0.012912	0.099474	0.587664	0.100485	2.1836	6.43256	0.16	0.03	94.6436	0.0741328	94.5694	4.91068	99.4801
Konnowoc Pass	ell99-05	33.56	0.16	5.85	1.22	0.01	0.04	0.41	0.08	1.5	5.3	0.15	0.03	50.79	99.1		71.7916	0.266896	11.0536	1.74423	0.012912	0.066316	0.573672	0.08932	2.02185	6.38438	0.15	0.03	94.1847	0.0699223	94.1148	5.60219	99.717
Konnowoc Pass	ell99-05	33.76	0.16	5.89	1.23	0.03	0.04	0.41	0.06	1.63	5.36	0.22	0.02	50.83	99.64		72.2194	0.266896	11.1292	1.75853	0.038736	0.066316	0.573672	0.06699	2.19708	6.45666	0.22	0.02	95.0134	0.0971412	94.9163	5.30797	100.224
Konnowoc Pass	ell99-05	33.04	0.15	6.02	1.46	0.04	0.08	0.56	0.05	1.63	5.15	0.16	0.02	50.98	99.34		70.6792	0.250215	11.3748	2.08736	0.051648	0.132632	0.783552	0.055825	2.19708	6.20369	0.16	0.02	93.996	0.071878	93.9241	6.08679	100.011
Konnowoc Pass	ell99-05	32.79	0.19	5.86	1.47	0.04	0.08	0.57	0.07	1.68	5.1	0.25	0.02	50.01	98.13		70.1444	0.316939	11.0725	2.10166	0.051648	0.132632	0.797544	0.078155	2.26447	6.14346	0.25	0.02	93.3733	0.109773	93.2636	5.46866	98.7322
Konnowoc Pass	ell99-05	32.86	0.19	5.93	1.47	0.02	0.1	0.57	0.05	1.51	5.21	0.21	0.02	50.33	98.47		70.2941	0.316939	11.2047	2.10166	0.025824	0.16579	0.797544	0.055825	2.03533	6.27597	0.21	0.02	93.5037	0.0929306	93.4108	5.68552	99.0963
Konnowoc Pass	ell99-05	33.07	0.26	5.98	1.5	0	0.09	0.57	0.08	1.79	4.91	0.16	0.02	50.45	98.88		70.7433	0.433706	11.2992	2.14455	0	0.149211	0.797544	0.08932	2.41274	5.91459	0.16	0.02	94.1642	0.071878	94.0923	5.38001	99.4723
Konnowoc Pass	ell99-05	33.26	0.19	6.07	1.51	0.03	0.08	0.59	0.09	1.61	5.22	0.17	0.02	50.82	99.66		71.1498	0.316939	11.4693	2.15885	0.038736	0.132632	0.825528	0.100485	2.17012	6.28801	0.17	0.02	94.8404	0.0760885	94.7643	5.50152	100.266
Konnowoc Pass	ell99-05	33.11	0.18	5.89	1.51	0.02	0.08	0.56	0.04	1.92	4.85	0.21	0.03	50.63	99.03		70.8289	0.300258	11.1292	2.15885	0.025824	0.132632	0.783552	0.04466	2.58797	5.84231	0.21	0.03	94.0741	0.0951854	93.9789	5.67636	99.6553
Konnowoc Pass	ell99-05	33.03	0.17	5.93	1.51	0.04	0.07	0.55	0.05	1.5	5.22	0.18	0.03	50.37	98.65		70.6578	0.283577	11.2047	2.15885	0.051648	0.116053	0.76956	0.055825	2.02185	6.28801	0.18	0.03	93.8179	0.0825538	93.7353	5.52289	99.2582
Konnowoc Pass	ell99-05	33.08	0.19	5.95	1.52	0.05	0.07	0.57	0.07	1.52	5.27	0.16	0.03	51.29	99.77		70.7647	0.316939	11.2425	2.17314	0.06456	0.116053	0.797544	0.078155	2.04881	6.34824	0.16	0.03	94.1407	0.0741328	94.0666	6.41022	100.477
Konnowoc Pass	ell99-05	33.11	0.18	6.01	1.53	0.01	0.08	0.55	0.13	1.88	4.92	0.12	0.03	50.87	99.42		70.8289	0.300258	11.3559	2.18744	0.012912	0.132632	0.76956	0.145145	2.53405	5.92663	0.12	0.03	94.3434	0.0572907	94.2861	5.76944	100.056
Konnowoc Pass	ell99-05	33.41	0.14	5.93	1.53	0.03	0.04	0.47	0.04	2.11	4.72	0.23	0.05	51.17	99.87		71.4707	0.233534	11.2047	2.18744	0.038736	0.066316	0.657624	0.04466	2.84407	5.68571	0.23	0.05	94.7135	0.108116	94.6054	5.91656	100.522
Konnowoc Pass	ell99-05	33.24	0.2	5.92	1.58	0.04	0.07	0.61	0.07	1.84	4.89	0.2	0.02	50.95	99.63		71.107	0.33362	11.1858	2.25893	0.051648	0.116053	0.853512	0.078155	2.48014	5.89049	0.2	0.02	94.5754	0.0887201	94.4867	5.78011	100.267
Konnowoc Pass	ell99-05	32.81	0.2	6	1.71	0.02	0.09	0.68	0.07	1.74	4.92	0.19	0.02	50.83	99.28		70.1872	0.33362	11.337	2.44479	0.025824	0.149211	0.951456	0.078155	2.34535	5.92663	0.19	0.02	93.9892	0.0845096	93.9047	6.04116	99.9458
Konnowoc Pass	ell99-05	32.78	0.21	5.96	1.74	0.03	0.09	0.64	0.06	1.82	4.88	0.23	0.02	50.96	99.42		70.123	0.350301	11.2614	2.48768	0.038736	0.149211	0.895488	0.06699	2.45318	5.87845	0.23	0.02	93.9544	0.101352	93.8531	6.25672	100.11
Konnowoc Pass	ell99-05	32.83	0.23	6.08	1.74	0.02	0.09	0.66	0.06	1.84	5.1	0.22	0.02	50.68	99.57		70.2299	0.383663	11.4882	2.48768	0.025824	0.149211	0.923472	0.06699	2.48014	6.14346	0.22	0.02	94.6185	0.0971412	94.5214	5.67358	100.195
Konnowoc Pass	ell99-05	32.85	0.19	6	1.75	0.03	0.09	0.64	0.09	1.64	5.01	0.15	0.03	50.01	98.48		70.2727	0.316939	11.337	2.50197	0.038736	0.149211	0.895488	0.100485	2.21056	6.03505	0.15	0.03	94.0382	0.0699223	93.9682	5.06963	99.0379
Selah Butte	ell12-01	33.461	0.174	6.07	1.502	0	0.077	0.564	0	0.789	4.545	0.0283661	0.018	51.141	98.3694		71.5798	0.290249	11.4693	2.14741	0	0.127658	0.789149	0	1.06349	5.47491	0.0283661	0.018	92.9883	0.0160023	92.9723	6.0656	99.0379
Selah Butte	ell12-01	33.175	0.2	6.062	1.535	0.031	0.075	0.565	0	0.687	4.688	0	0.019	51.564	98.601		70.968	0.33362	11.4541	2.19459	0.0400272	0.124342	0.790548	0	0.926007	5.64716	0	0.019	92.4974	0.0042841	92.4931	6.86526	99.3584
Selah Butte	ell12-01	33.181	0.211	6.081	1.528	0.036	0.092	0.562	0	0.755	4.677	0	0.026	51.871	99.02		70.9808	0.351969	11.49	2.18458	0.0464832	0.152527	0.78635	0	1.01766	5.63391	0	0.026	92.6703	0.00586246	92.6645	7.14386	99.8083
Selah Butte	ell12-01	33.001	0.186	5.865	1.28	0.027	0.04	0.45	0	0.582	4.983	-0.00377587	0.041	52.482	98.9332		70.5957	0.310267	11.0819	1.83002	0.0348624	0.066316	0.62964	0	0.784478	6.00252	-0.00377587	0.041	91.373	0.00765481	91.3653	8.50783	99.8732
Selah Butte	ell12-01	32.923	0.208	6.111	1.66	0.036	0.1	0.621	0	0.613	4.486	0.0481969	0.033	51.141	97.9802		70.4289	0.346965	11.5467	2.3733	0.0464832	0.16579	0.868903	0	0.826263	5.40384	0.0481969	0.033	92.0884	0.0277343	92.0606	6.65346	98.7141
Selah Butte	ell12-01	33.426	0.144	5.913	1.243	0.036	0.049	0.412	0	1.603	5.506	0.0532005	0.026	50.614	99.0252		71.5049	0.240206	11.1726	1.77712	0.0464832	0.0812371	0.57647	0	2.16068	6.63253	0.0532005	0.026	94.2714	0.0282627	94.2432	5.37362	99.6168
Selah Butte	ell12-01	32.828	0.231	6.03	1.538	0.026	0.089	0.59	0	1.59	5.102	0	0.019	50.16	98.203		70.2257	0.385331	11.3937	2.19888	0.0335712	0.147553	0.825528	0	2.14316	6.14587	0	0.019	93.5182	0.0042841	93.514	5.26911	98.7831
Selah Butte	ell12-01	33.18	0.15	5.897	1.288	0.043	0.038	0.388	0	1.592	5.301	0.119013	0.043	51.542	99.581		70.9787	0.250215	11.1424	1.84145	0.0555216	0.0630002	0.54289	0	2.14586	6.38558	0.119013	0.043	93.5676	0.0598064	93.5078	6.8263	100.334
Selah Butte	ell12-01	33.577	0.111	5.937	1.346	0.039	0.043	0.387	0	1.707	5.379	0.157483	0.049	49.86	98.5925		71.8279	0.185159	11.218	1.92438	0.0503568	0.0712897	0.54149	0	2.30087	6.47954	0.157483	0.049	94.8054	0.0773569	94.7281	4.34127	99.0694
Selah Butte	ell12-01	33.061	0.194	5.934	1.431	0.021	0.084	0.567	0	2.069	4.584	0.0672396	0.015	50.092	98.1192		70.7241	0.323611	11.2123	2.0459	0.0271152	0.139264	0.793346	0	2.78881	5.52189	0.0672396	0.015	93.6586	0.0316936	93.6269	5.04788	98.6747
Selah Butte	ell12-01	33.013	0.193	5.995	1.545	0.03	0.079	0.563	0	1.924	4.888	0.0402315	0.02	49.854	98.1442		70.6214	0.321943	11.3276	2.20889	0.038736	0.130974	0.78775	0	2.59336	5.88808	0.0402315	0.02	93.9789	0.0214491	93.9575	4.70402	98.6615
Selah Butte	ell12-01	33.062	0.184	6.071	1.533	0.023	0.08	0.583	0	2.235	4.502	0.0145481	0.035	50.486	98.8085		70.7262	0.30693	11.4712	2.19173	0.0296976	0.132632	0.815734	0	3.01256	5.42311	0.0145481	0.035	94.1593	0.0140173	94.1453	5.24009	99.3854
Selah Butte	ell12-01	33.272	0.206	6.088	1.462	0.028	0.082	0.515	0	1.893	4.811	0.129422	0.023	51	99.5094		71.1755	0.343629	11.5033	2.09022	0.0361536	0.135948	0.720588	0	2.55157	5.79533	0.129422	0.023	94.5046	0.0596793	94.4449	5.69144	100.136
Selah Butte	ell12-01	33.01	0.212	6.06	1.508	0.031	0.079	0.544	0	1.848	4.865	0.0722078	0.038	51.068	99.3352		70.615	0.353637	11.4504	2.15599	0.0400272	0.130974	0.761165	0	2.49092	5.86038	0.0722078	0.038	93.9687	0.0389715	93.9297	6.07513	100.005
Selah Butte	ell12-01	33.336	0.183	5.904	1.309	0.042	0.039	0.417	0	1.828	5.004	0.0804589	0.027	50.617	98.7865		71.3124	0.305262	11.1556	1.87148	0.0542304	0.0646581	0.583466	0	2.46396	6.02782	0.0804589	0.027	93.9463	0.0399654	93.9063	5.48402	99.3904
Selah Butte	ell12-01	33.114	0.179	6.115	1.447	0.022	0.083	0.553	0	2.167	4.671	0.0628174	0.017	50.714	99.1448		70.8375	0.29859	11.5543	2.06878	0.0284064	0.137606	0.773758	0	2.9209	5.62669	0.0628174	0.017	94.3263	0.0302826	94.296	5.44882	99.7448
Selah Butte	ell12-01	33.237	0.218	6.082	1.508	0.019	0.078	0.576	0	1.86	4.817	0.0942078	0.028	51.297	99.8142		71.1006	0.363646	11.4919	2.15599	0.0245328	0.129316	0.805939	0	2.50709	5.80256	0.0942078	0.028	94.5038	0.0459799	94.4578	6.01981	100.478
Selah Butte	ell12-01	33.142	0.132	5.969	1.442	0.024	0.024	0.417	0	1.664	4.888	0.110949	0.035	50.641	98.4889		70.8974	0.220189	11.2784	2.06163	0.0309888	0.0397896	0.583466	0	2.24291	5.88808	0.110949	0.035	93.3888	0.0546073	93.3342	5.79302	99.1272
Selah Butte	ell12-01	33.495	0.148	5.968	1.284	0.029	0.056	0.443	0	1.853	4.746	0.146119	0.023	50.936	99.1271		71.6525	0.246879	11.2765	1.83573	0.0374448	0.0928424	0.619846	0	2.49766	5.71703	0.146119	0.023	94.1456	0.0667096	94.0789	5.67314	99.752
Selah Butte	ell12-01	33.341	0.19	6.121	1.547	0.028	0.088	0.59	0	1.828	5.066	0.0411787	0.033	50.915	99.7882		71.3231	0.316939	11.5656	2.21175	0.0361536	0.145895	0.825528	0	2.46396	6.1025	0.0411787	0.033	95.0656	0.0247792	95.0408	5.33462	100.375
Selah Butte	ell12-01	32.809	0.2	6.065	1.694	0.016	0.082	0.636	0	2.092	4.529	0.0652997	0.02	50.626	98.8343		70.185	0.33362	11.4598	2.42191	0.0206592	0.135948	0.889891	0	2.81981	5.45563	0.0652997	0.02	93.8076	0.0320042	93.7756	5.685	99.4606
Selah Butte	ell12-01	32.921	0.196	5.904	1.321	0.033	0.063	0.423	0	1.561	5.197	0.103142	0.02	51.096	98.8381		70.4246	0.326948	11.1556	1.88863	0.0426096	0.104448	0.591862	0	2.10407	6.26031	0.103142	0.02	93.0222	0.0479379	92.9743	6.59077	99.5651
Idaho City	forester-2	33.94	0.209	6.147	1.263	0.029	0.059	0.581	0.107	1.133	3.374	0	0.02	52.898	99.76		72.6044	0.348633	11.6148	1.80571	0.0374448	0.0978161	0.812935	0.119466	1.52717	4.06432	0	0.02	93.0527	0.00450958	93.0482	7.54464	100.593
Idaho City	forester-2	34.174	0.185	6.117	1.298	0.03	0.054	0.443	0.084	1.617	3.508	0.171	0.007	53.311	100.999		73.105	0.308598	11.5581	1.85575	0.038736	0.0895266	0.619846	0.093786	2.17955	4.22574	0.171	0.007	94.2526	0.0735784	94.179	7.66626	101.845
Idaho City	forester-2	33.774	0.229	6.061	1.42	0.034	0.089	0.595	0.026	1.754	3.4	0.188	0.015	52.282	99.867		72.2493	0.381995	11.4523	2.03017	0.0439008	0.147553	0.832524	0.029029	2.36422	4.09564	0.188	0.015	93.8296	0.0825401	93.7471	6.8788	100.626
Idaho City	forester-2	33.778	0.184	5.974	1.427	0.026	0.066	0.56	0.048	1.816	3.339	0.188	0.023	52.849	100.278		72.2579	0.30693	11.2879	2.04018	0.0335712	0.109421	0.783552	0.053592	2.44779	4.02216	0.188	0.023	93.554	0.0843439	93.4696	7.65333	101.123
Idaho City	forester-2	34.182	0.221	6.213	1.481	0.02	0.08	0.588	0.088	1.638	3.343	0.173	0.016	52.866	100.909		73.1221	0.36865	11.7395	2.11739	0.025824	0.132632	0.82273	0.098252	2.20786	4.02698	0.173	0.016	94.8509	0.0764498	94.7745	6.89516	101.67
Idaho City	forester-2	33.477	0.231	5.962	1.486	0.029	0.098	0.593	0.046	1.779	3.433	0.109	0.022	52.44	99.705		71.614	0.385331	11.2652	2.12453	0.0374448	0.162474	0.829726	0.051359	2.39791	4.13539	0.109	0.022	93.1344	0.0508553	93.0835	7.44311	100.527
Idaho City	forester-2	33.933	0.242	6.213	1.491	0.027	0.098	0.627	0.069	1.687	3.415	0.136	0.021	53.23	101.189		72.5895	0.40368	11.7395	2.13168	0.0348624	0.162474	0.877298	0.0770385	2.27391	4.11371	0.136	0.021	94.5606	0.0619982	94.4986	7.52055	102.019
Idaho City	forester-2	33.943	0.231	6.145	1.493	0.002	0.089	0.593	0.04	1.69	3.516	0.103	0.03	52.45	100.325		72.6109	0.385331	11.611	2.13454	0.0025824	0.147553	0.829726	0.04466	2.27795	4.23537	0.103	0.03	94.4126	0.0501328	94.3624	6.70174	101.064
Idaho City	forester-2	34.216	0.251	6.195	1.496	0.033	0.082	0.587	0.044	1.8	3.548	0.099	0.022	52.685	101.058		73.1949	0.418693	11.7055	2.13883	0.0426096	0.135948	0.82133	0.049126	2.42622	4.27392	0.099	0.022	95.328	0.0466448	95.2814	6.49253	101.774
Idaho City	forester-2	33.802	0.243	6.112	1.5	0.026	0.081	0.571	0.022	1.823	3.381	0.047	0.025	52.794	100.427		72.3092	0.405348	11.5486	2.14455	0.0335712	0.13429	0.798943	0.024563	2.45722	4.07275	0.047	0.025	94.0011	0.0254265	93.9757	7.25163	101.227
Idaho City	forester-2	33.781	0.183	6.066	1.508	0.024	0.073	0.575	0.064	1.612	3.277	0.138	0.018	52.273	99.592		72.2643	0.305262	11.4617	2.15599	0.0309888	0.121027	0.80454	0.071456	2.17281	3.94747	0.138	0.018	93.4916	0.0621639	93.4294	6.9268	100.356
Idaho City	forester-2	33.769	0.209	6.059	1.512	0.034	0.077	0.574	0.066	1.894	3.792	0.197	0.011	52.034	100.228		72.2386	0.348633	11.4485	2.16171	0.0439008	0.127658	0.803141	0.073689	2.55292	4.56784	0.197	0.011	94.5746	0.0854276	94.4892	6.45002	100.939
Idaho City	forester-2	33.899	0.226	6.086	1.514	0.023	0.095	0.596	0.036	1.783	3.588	0.212	0.031	52.646	100.735		72.5167	0.376991	11.4995	2.16457	0.0296976	0.1575	0.833923	0.040194	2.40331	4.3221	0.212	0.031	94.5875	0.096253	94.4913	7.01805	101.509
Idaho City	forester-2	33.382	0.188	5.921	1.515	0.042	0.089	0.598	0.025	1.779	3.279	0.167	0.021	52.781	99.787		71.4108	0.313603	11.1877	2.166	0.0542304	0.147553	0.836722	0.0279125	2.39791	3.94988	0.167	0.021	92.6803	0.0750509	92.6053	8.07342	100.679
Idaho City	forester-2	34.11	0.234	6.151	1.521	0.026	0.097	0.585	0.041	1.531	3.394	0.211	0.015	53.088	101.004		72.9681	0.390335	11.6223	2.17457	0.0335712	0.160816	0.818532	0.0457765	2.06363	4.08841	0.211	0.015	94.5921	0.0922243	94.4999	7.31099	101.811
Idaho City	forester-2	33.758	0.193	6.123	1.524	0.006	0.075	0.589	0.017	1.75	3.576	0.151	0.022	52.569	100.353		72.2151	0.321943	11.5694	2.17886	0.0077472	0.124342	0.824129	0.0189805	2.35883	4.30765	0.151	0.022	94.1	0.0685395	94.0315	7.10561	101.137
Idaho City	forester-2	33.943	0.204	6.267	1.524	0.029	0.091	0.609	0.023	1.558	3.316	0.181	0.039	53.778	101.562		72.6109	0.340292	11.8415	2.17886	0.0374448	0.150869	0.852113	0.0256795	2.10003	3.99445	0.181	0.039	94.3521	0.0850042	94.2671	8.20061	102.468
Idaho City	forester-2	33.836	0.252	6.137	1.533	0	0.08	0.626	0.033	1.714	3.443	0.158	0.025	53.005	100.842		72.382	0.420361	11.5959	2.19173	0	0.132632	0.875899	0.0368445	2.3103	4.14744	0.158	0.025	94.276	0.0721633	94.2039	7.46176	101.666
Idaho City	forester-2	33.829	0.21	6.101	1.533	0.013	0.078	0.587	0.051	1.708	3.48	0.167	0.023	53.1	100.88		72.367	0.350301	11.5278	2.19173	0.0167856	0.129316	0.82133	0.0569415	2.30221	4.19201	0.167	0.023	94.1455	0.0755018	94.07	7.65516	101.725
Idaho City	forester-2	33.908	0.231	6.06	1.535	0.007	0.087	0.58	0.079	1.956	3.998	0.195	0.027	52.238	100.901		72.536	0.385331	11.4504	2.19459	0.0090384	0.144237	0.811536	0.0882035	2.63649	4.81599	0.195	0.027	95.2938	0.0881932	95.2056	6.40115	101.607
Idaho City	forester-2	33.555	0.184	5.979	1.544	0.004	0.089	0.554	0.052	1.828	3.529	0.155	0.014	51.799	99.286		71.7809	0.30693	11.2973	2.20746	0.0051648	0.147553	0.775157	0.058058	2.46396	4.25103	0.155	0.014	93.4625	0.0684199	93.3941	6.62233	100.016
Idaho City	forester-2	34.013	0.216	6.141	1.551	0	0.081	0.602	0.073	1.683	3.31	0.155	0.034	53.601	101.46		72.7606	0.36031	11.6034	2.21746	0	0.13429	0.842318	0.0815045	2.26852	3.98723	0.155	0.034	94.4447	0.0729294	94.3717	7.96814	102.34
Idaho City	forester-2	34.198	0.232	6.214	1.552	0.006	0.09	0.625	0.056	0.188	1.948	0.154	0.028	53.603	98.894		73.1564	0.386999	11.7414	2.21889	0.0077472	0.149211	0.8745	0.062524	0.253405	2.34656	0.154	0.028	91.3796	0.0711555	91.3084	8.52769	99.8361
Idaho City	forester-2	33.27	0.212	6.021	1.553	0.041	0.088	0.567	0.067	1.598	3.026	0	0.019	52.647	99.109		71.1712	0.353637	11.3767	2.22032	0.0529392	0.145895	0.793346	0.0748055	2.15394	3.64512	0	0.019	92.0069	0.0042841	92.0026	7.98869	99.9913
Idaho City	forester-2	33.647	0.2	5.998	1.555	0.017	0.069	0.586	0.027	1.596	3.418	0.146	0.024	52.284	99.567		71.9777	0.33362	11.3332	2.22318	0.0219504	0.114395	0.819931	0.0301455	2.15125	4.11732	0.146	0.024	93.2927	0.0668852	93.2258	7.12777	100.354
Idaho City	forester-2	33.993	0.229	6.12	1.56	0.05	0.089	0.582	0.039	0.357	1.892	0.01	0.038	53.622	98.581		72.7178	0.381995	11.5637	2.23033	0.06456	0.147553	0.814334	0.0435435	0.4812	2.2791	0.01	0.038	90.7722	0.0127787	90.7594	8.79323	99.5526
Idaho City	forester-2	34.159	0.175	6.182	1.587	0.037	0.083	0.604	0.042	1.546	3.312	0.203	0.026	52.838	100.794		73.0729	0.291917	11.6809	2.26893	0.0477744	0.137606	0.845117	0.046893	2.08385	3.98964	0.203	0.026	94.6946	0.0913361	94.6032	6.95845	101.562
Idaho City	forester-2	33.841	0.197	6.03	1.593	0.044	0.072	0.573	0.027	1.854	3.57	0.107	0.02	51.777	99.705		72.3927	0.328616	11.3937	2.27751	0.0568128	0.119369	0.801742	0.0301455	2.49901	4.30042	0.107	0.02	94.327	0.0495622	94.2774	6.0999	100.377
Idaho City	forester-2	33.641	0.217	6.15	1.681	0.038	0.075	0.645	0.083	1.838	3.853	0.181	0.018	51.927	100.347		71.9648	0.361978	11.6204	2.40333	0.0490656	0.124342	0.902484	0.0926695	2.47744	4.64132	0.181	0.018	94.8369	0.0802692	94.7566	6.28303	101.04
Idaho City	forester-2	33.4	0.252	6.057	1.699	0.031	0.084	0.656	0	1.807	3.497	0.041	0.023	52.238	99.785		71.4493	0.420361	11.4447	2.42906	0.0400272	0.139264	0.917875	0	2.43566	4.21249	0.041	0.023	93.5527	0.0224492	93.5303	7.03052	100.561
Ibapah	i-90-08	33.613	0.183	5.909	1.296	0	0.045	0.424	0.052	1.569	4.991	0.11	0.018	51.511	99.721		71.9049	0.305262	11.1651	1.85289	0	0.0746055	0.593261	0.058058	2.11486	6.01216	0.11	0.018	94.2091	0.0503744	94.1587	6.25141	100.41
Ibapah	i-90-08	33.793	0.138	5.93	1.27	0.005	0.063	0.429	0.047	1.438	5.433	0.096	0.032	50.599	99.273		72.29	0.230198	11.2047	1.81572	0.006456	0.104448	0.600257	0.0524755	1.93828	6.54459	0.096	0.032	94.9151	0.0476364	94.8675	4.94995	99.8175
Ibapah	i-90-08	33.228	0.167	6.044	1.502	0.017	0.085	0.575	0.044	1.853	4.781	0.101	0.037	52.15	100.584		71.0813	0.278573	11.4201	2.14741	0.0219504	0.140922	0.80454	0.049126	2.49766	5.75919	0.101	0.037	94.3388	0.050869	94.288	7.0769	101.365
Ibapah	i-90-08	33.194	0.225	6.044	1.551	0.017	0.076	0.567	0.004	1.55	5.368	0.074	0.023	51.001	99.694		71.0086	0.375323	11.4201	2.21746	0.0219504	0.126	0.793346	0.004466	2.08925	6.46629	0.074	0.023	94.6198	0.0363439	94.5835	5.74318	100.327
Ibapah	i-90-08	32.724	0.266	6.053	1.645	0.015	0.104	0.622	0.032	1.694	4.915	0.147	0.023	51.475	99.715		70.0032	0.443715	11.4371	2.35186	0.019368	0.172422	0.870302	0.035728	2.28334	5.92061	0.147	0.023	93.7077	0.0670808	93.6406	6.82765	100.468
Ibapah	i-90-08	33.407	0.199	6.053	1.544	0.028	0.085	0.576	0.091	1.538	5.354	0.043	0.015	50.639	99.572		71.4643	0.331952	11.4371	2.20746	0.0361536	0.140922	0.805939	0.101601	2.07307	6.44943	0.043	0.015	95.1059	0.0214875	95.0844	5.0423	100.127
Ibapah	i-90-08	33.403	0.217	6.059	1.562	0.036	0.087	0.552	0.073	1.656	5.261	0.14	0.02	51.022	100.088		71.4557	0.361978	11.4485	2.23319	0.0464832	0.144237	0.772358	0.0815045	2.23212	6.3374	0.14	0.02	95.2735	0.063457	95.21	5.48156	100.692
Ibapah	i-90-08	33.076	0.217	6.066	1.525	0.044	0.077	0.547	0.037	1.44	5.473	0.093	0.016	50.879	99.49		70.7562	0.361978	11.4617	2.18029	0.0568128	0.127658	0.765362	0.0413105	1.94098	6.59278	0.093	0.016	94.3941	0.0427656	94.3513	5.7749	100.126
Ibapah	i-90-08	32.955	0.182	6.072	1.678	0.019	0.098	0.671	0.014	1.48	5.268	0.155	0.016	51.104	99.712		70.4973	0.303594	11.473	2.39904	0.0245328	0.162474	0.938863	0.015631	1.99489	6.34583	0.155	0.016	94.3262	0.0688708	94.2574	6.13034	100.388
Ibapah	i-90-08	32.856	0.184	6.086	1.664	0.021	0.083	0.659	0.054	1.577	5.308	0.168	0.038	51.271	99.969		70.2856	0.30693	11.4995	2.37902	0.0271152	0.137606	0.922073	0.060291	2.12564	6.39402	0.168	0.038	94.3437	0.079305	94.2644	6.41151	100.676
Ibapah	i-90-08	33.132	0.211	6.092	1.519	0.025	0.083	0.566	0.018	1.41	5.475	0.111	0.017	50.795	99.454		70.876	0.351969	11.5108	2.17171	0.03228	0.137606	0.791947	0.020097	1.90054	6.59518	0.111	0.017	94.5161	0.05057	94.4656	5.60582	100.071
Ibapah	i-90-08	33.224	0.229	6.096	1.491	0.022	0.086	0.58	0.059	1.729	5.09	0.108	0.022	51.335	100.071		71.0728	0.381995	11.5184	2.13168	0.0284064	0.142579	0.811536	0.0658735	2.33052	6.13141	0.108	0.022	94.7452	0.0504342	94.6947	6.04214	100.737
Ibapah	i-90-08	33.06	0.202	6.104	1.498	0.029	0.082	0.556	0.092	1.459	5.369	0.076	0.025	51.171	99.723		70.722	0.336956	11.5335	2.14169	0.0374448	0.135948	0.777955	0.102718	1.96659	6.4675	0.076	0.025	94.3233	0.037637	94.2856	6.11089	100.397
Ibapah	i-90-08	32.772	0.242	6.113	1.634	0.03	0.09	0.603	0.075	1.806	4.902	0.094	0.034	51.534	99.929		70.1059	0.40368	11.5505	2.33613	0.038736	0.149211	0.843718	0.0837375	2.43431	5.90495	0.094	0.034	93.9788	0.0472452	93.9316	6.74099	100.673
Ibapah	i-90-08	32.98	0.211	6.117	1.682	0.019	0.09	0.657	0.043	1.746	5.02	0.127	0.027	51.168	99.887		70.5508	0.351969	11.5581	2.40476	0.0245328	0.149211	0.919274	0.0480095	2.35343	6.04709	0.127	0.027	94.5612	0.0595616	94.5016	6.05245	100.554
Ibapah	i-90-08	33	0.178	6.13	1.667	0.025	0.099	0.591	0.024	1.724	5.029	0.155	0.037	51.494	100.153		70.5936	0.296922	11.5826	2.38331	0.03228	0.164132	0.826927	0.026796	2.32378	6.05793	0.155	0.037	94.4803	0.0736059	94.4067	6.45846	100.865
Ibapah	i-90-08	33.009	0.217	6.131	1.67	0.038	0.087	0.657	0.047	1.555	5.246	0.187	0.028	51.219	100.091		70.6129	0.361978	11.5845	2.3876	0.0490656	0.144237	0.919274	0.0524755	2.09598	6.31933	0.187	0.028	94.7423	0.0850503	94.6573	6.1068	100.764
Ibapah	i-90-08	33.11	0.234	6.134	1.671	0.034	0.094	0.653	0.014	1.841	4.744	0.142	0.025	51.344	100.04		70.8289	0.390335	11.5902	2.38903	0.0439008	0.155843	0.913678	0.015631	2.48148	5.71462	0.142	0.025	94.6906	0.0654265	94.6252	6.08554	100.711
Ibapah	i-90-08	32.43	0.241	6.136	1.605	0.059	0.108	0.656	0.008	1.463	5.476	0.185	0.024	50.797	99.188		69.3743	0.402012	11.594	2.29467	0.0761808	0.179053	0.917875	0.008932	1.97198	6.59639	0.185	0.024	93.6243	0.0833062	93.541	6.34681	99.8878
Ibapah	i-90-08	33.096	0.249	6.159	1.644	0.034	0.099	0.647	0.039	1.541	5.445	0.047	0.023	50.382	99.405		70.799	0.415357	11.6374	2.35043	0.0439008	0.164132	0.905282	0.0435435	2.07711	6.55905	0.047	0.023	95.0652	0.0249755	95.0402	4.90421	99.9444
Huntinton Creek	htc93-462	33.8	0.22	6.05	1.6	0.01	0.09	0.6	0.12	1.61	5.19	0.2	0.01	51.17	100.67		72.305	0.366982	11.4315	2.28752	0.012912	0.149211	0.83952	0.13398	2.17012	6.25187	0.2	0.01	96.1586	0.0864653	96.0721	5.16638	101.238
Huntinton Creek	htc93-462	34.15	0.17	5.96	1.32	0.04	0.058	0.44	0.06	1.65	5.32	0.22	0.03	51.07	100.488		73.0537	0.283577	11.2614	1.8872	0.051648	0.0961582	0.615648	0.06699	2.22404	6.40847	0.22	0.03	96.1988	0.099396	96.0994	4.93085	101.03
Huntinton Creek	htc93-462	34.3	0.16	5.99	1.17	0.03	0.046	0.39	0.09	1.59	5.32	0.2	0.028	50.39	99.704		73.3746	0.266896	11.3181	1.67275	0.038736	0.0762634	0.545688	0.100485	2.14316	6.40847	0.2	0.028	96.1731	0.0905239	96.0826	4.06778	100.15
Huntinton Creek	htc93-462	33.71	0.21	5.99	1.51	0.01	0.076	0.56	0.11	1.68	4.82	0.18	0.014	51.2	100.07		72.1124	0.350301	11.3181	2.15885	0.012912	0.126	0.783552	0.122815	2.26447	5.80617	0.18	0.014	95.2496	0.0789462	95.1707	5.50554	100.676
Huntinton Creek	htc93-462	34.12	0.19	6	1.35	0.02	0.058	0.46	0.1	1.63	5.21	0.2	0.03	51.24	100.608		72.9895	0.316939	11.337	1.9301	0.025824	0.0961582	0.643632	0.11165	2.19708	6.27597	0.2	0.03	96.1538	0.0909749	96.0629	5.10698	101.17
Huntinton Creek	htc93-462	33.63	0.18	6.02	1.58	0.02	0.074	0.57	0.1	1.69	5.09	0.14	0.022	50.47	99.586		71.9413	0.300258	11.3748	2.25893	0.025824	0.122685	0.797544	0.11165	2.27795	6.13141	0.14	0.022	95.5043	0.0639079	95.4404	4.65754	100.098
Huntinton Creek	htc93-462	33.6	0.23	6.03	1.57	0.05	0.077	0.57	0.09	1.52	5.11	0.15	0.028	51.05	100.075		71.8771	0.383663	11.3937	2.24463	0.06456	0.127658	0.797544	0.100485	2.04881	6.15551	0.15	0.028	95.3717	0.0694713	95.3022	5.36319	100.665
Huntinton Creek	htc93-462	33.68	0.23	6.04	1.56	0	0.075	0.58	0.08	1.7	4.85	0.24	0.033	50.56	99.628		72.0483	0.383663	11.4126	2.23033	0	0.124342	0.811536	0.08932	2.29143	5.84231	0.24	0.033	95.5068	0.108493	95.3983	4.75223	100.151
Huntinton Creek	htc93-462	33.61	0.24	6.04	1.56	0.06	0.086	0.59	0.12	1.61	5.19	0.19	0.025	50.39	99.711		71.8985	0.400344	11.4126	2.23033	0.077472	0.142579	0.825528	0.13398	2.17012	6.25187	0.19	0.025	95.7583	0.085637	95.6727	4.53687	100.21
Huntinton Creek	htc93-462	33.53	0.16	6.06	1.6	0.05	0.083	0.6	0.12	1.63	5.17	0.18	0.02	50.58	99.783		71.7274	0.266896	11.4504	2.28752	0.06456	0.137606	0.83952	0.13398	2.19708	6.22778	0.18	0.02	95.5327	0.0802991	95.4524	4.86571	100.318
Huntinton Creek	htc93-462	33.51	0.24	6.06	1.82	0.04	0.081	0.67	0.12	1.68	5.16	0.19	0.021	50.01	99.602		71.6846	0.400344	11.4504	2.60205	0.051648	0.13429	0.937464	0.13398	2.26447	6.21574	0.19	0.021	96.0859	0.0847351	96.0012	4.04464	100.046
Huntinton Creek	htc93-462	33.83	0.19	6.08	1.59	0.03	0.077	0.59	0.09	1.59	5.11	0.19	0.024	50.61	100.001		72.3691	0.316939	11.4882	2.27322	0.038736	0.127658	0.825528	0.100485	2.14316	6.15551	0.19	0.024	96.0525	0.0854115	95.9671	4.53185	100.499
Huntinton Creek	htc93-462	33.37	0.27	6.08	1.67	0.05	0.096	0.63	0.12	1.69	5.07	0.19	0.03	50.52	99.786		71.3851	0.450387	11.4882	2.3876	0.06456	0.159158	0.881496	0.13398	2.27795	6.10732	0.19	0.03	95.5557	0.0867644	95.469	4.85048	100.319
Huntinton Creek	htc93-462	33.58	0.2	6.08	1.58	0.01	0.087	0.57	0.15	1.62	5.15	0.2	0.023	50.75	100		71.8343	0.33362	11.4882	2.25893	0.012912	0.144237	0.797544	0.167475	2.1836	6.20369	0.2	0.023	95.6475	0.0893965	95.5581	4.99089	100.549
Huntinton Creek	htc93-462	33.6	0.2	6.08	1.74	0.04	0.1	0.68	0.13	1.8	4.79	0.2	0.015	51.3	100.675		71.8771	0.33362	11.4882	2.48768	0.051648	0.16579	0.951456	0.145145	2.42622	5.77003	0.2	0.015	95.9119	0.0875927	95.8243	5.45083	101.275
Huntinton Creek	htc93-462	33.84	0.2	6.08	1.58	0.01	0.074	0.63	0.07	1.56	5.17	0.16	0.016	50.47	99.86		72.3905	0.33362	11.4882	2.25893	0.012912	0.122685	0.881496	0.078155	2.10272	6.22778	0.16	0.016	96.073	0.0709761	96.002	4.33398	100.336
Huntinton Creek	htc93-462	33.58	0.19	6.09	1.54	0.04	0.087	0.61	0.1	1.66	5.01	0.21	0.029	50.91	100.056		71.8343	0.316939	11.5071	2.20174	0.051648	0.144237	0.853512	0.11165	2.23751	6.03505	0.21	0.029	95.5327	0.0949599	95.4377	5.18935	100.627
Huntinton Creek	htc93-462	33.57	0.24	6.1	1.56	0	0.087	0.57	0.11	1.67	5.18	0.14	0.024	50.56	99.811		71.8129	0.400344	11.5259	2.23033	0	0.144237	0.797544	0.122815	2.25099	6.23983	0.14	0.024	95.689	0.0643589	95.6246	4.70343	100.328
Huntinton Creek	htc93-462	33.3	0.22	6.1	1.7	0.02	0.089	0.66	0.13	1.76	4.93	0.2	0.017	50.95	100.076		71.2354	0.366982	11.5259	2.43049	0.025824	0.147553	0.923472	0.145145	2.3723	5.93868	0.2	0.017	95.3288	0.0880437	95.2407	5.43351	100.674
Huntinton Creek	htc93-462	33.28	0.22	6.11	1.7	0.04	0.082	0.66	0.05	1.82	4.93	0.18	0.029	50.49	99.591		71.1926	0.366982	11.5448	2.43049	0.051648	0.135948	0.923472	0.055825	2.45318	5.93868	0.18	0.029	95.3026	0.0823284	95.2203	4.91086	100.131
Huntinton Creek	htc93-462	33.52	0.2	6.13	1.7	0.02	0.097	0.67	0.1	1.56	5.08	0.16	0.027	50.74	100.004		71.706	0.33362	11.5826	2.43049	0.025824	0.160816	0.937464	0.11165	2.10272	6.11937	0.16	0.027	95.6976	0.0734564	95.6241	4.92114	100.545
Huntinton Creek	htc93-462	33.42	0.26	6.13	1.69	0	0.1	0.66	0.12	1.82	4.92	0.22	0.029	50.44	99.809		71.4921	0.433706	11.5826	2.41619	0	0.16579	0.923472	0.13398	2.45318	5.92663	0.22	0.029	95.7766	0.0991705	95.6775	4.64175	100.319
Cougar Point XI
Konnowoc Canal	ell99-04	33.58	0.09	5.91	1.27	0.02	0.04	0.42	0.05	1.82	5.15	0.26	0.03	50.87	99.51		71.8343	0.150129	11.1669	1.81572	0.025824	0.066316	0.587664	0.055825	2.45318	6.20369	0.26	0.03	94.6496	0.116238	94.5334	5.59252	100.126
Konnowoc Canal	ell99-04	33.48	0.1	5.9	1.28	0.01	0.03	0.42	0.04	1.62	5.31	0.18	0.04	51.09	99.5		71.6204	0.16681	11.148	1.83002	0.012912	0.049737	0.587664	0.04466	2.1836	6.39643	0.18	0.04	94.2603	0.0848086	94.1755	5.98392	100.159
Konnowoc Canal	ell99-04	33.64	0.11	5.87	1.29	0	0.03	0.4	0.04	1.75	5.1	0.2	0.05	50.9	99.38		71.9627	0.183491	11.0914	1.84431	0	0.049737	0.55968	0.04466	2.35883	6.14346	0.2	0.05	94.4882	0.0954845	94.3927	5.6045	99.9972
Konnowoc Canal	ell99-04	33.83	0.15	5.9	1.29	0.02	0.02	0.38	0.07	1.82	5.06	0.28	0.05	51.24	100.11		72.3691	0.250215	11.148	1.84431	0.025824	0.033158	0.531696	0.078155	2.45318	6.09528	0.28	0.05	95.159	0.129169	95.0298	5.70898	100.739
Konnowoc Canal	ell99-04	33.65	0.09	5.91	1.3	0.02	0.04	0.39	0.06	1.64	5.35	0.22	0.04	50.56	99.27		71.9841	0.150129	11.1669	1.85861	0.025824	0.066316	0.545688	0.06699	2.21056	6.44461	0.22	0.04	94.7797	0.101651	94.6781	5.15969	99.8378
Konnowoc Canal	ell99-04	33.48	0.11	5.9	1.32	0.03	0.03	0.4	0	1.57	5.46	0.21	0.03	49.89	98.43		71.6204	0.183491	11.148	1.8872	0.038736	0.049737	0.55968	0	2.1162	6.57712	0.21	0.03	94.4206	0.0951854	94.3254	4.61146	98.9369
Konnowoc Canal	ell99-04	33.75	0.1	5.94	1.33	0	0.02	0.43	0.04	1.57	5.26	0.21	0.03	50.95	99.63		72.198	0.16681	11.2236	1.9015	0	0.033158	0.601656	0.04466	2.1162	6.3362	0.21	0.03	94.8618	0.0951854	94.7666	5.46508	100.232
Konnowoc Canal	ell99-04	33.57	0.14	5.96	1.33	0.02	0.03	0.45	0.04	1.77	5.27	0.19	0.04	50.23	99.04		71.8129	0.233534	11.2614	1.9015	0.025824	0.049737	0.62964	0.04466	2.38578	6.34824	0.19	0.04	94.9233	0.0890192	94.8343	4.72527	99.5595
Konnowoc Canal	ell99-04	33.68	0.12	5.82	1.33	0.03	0.02	0.43	0.05	1.69	5.23	0.19	0.05	50.01	98.65		72.0483	0.200172	10.9969	1.9015	0.038736	0.033158	0.601656	0.055825	2.27795	6.30006	0.19	0.05	94.6942	0.091274	94.6029	4.54677	99.1497
Konnowoc Canal	ell99-04	33.61	0.11	5.93	1.35	0	0.02	0.43	0.01	1.52	5.53	0.2	0.05	50.36	99.12		71.8985	0.183491	11.2047	1.9301	0	0.033158	0.601656	0.011165	2.04881	6.66144	0.2	0.05	94.8231	0.0954845	94.7276	4.93528	99.6629
Konnowoc Canal	ell99-04	33.54	0.09	5.97	1.35	0.02	0.02	0.42	0.03	1.83	4.98	0.25	0.04	51.01	99.55		71.7488	0.150129	11.2803	1.9301	0.025824	0.033158	0.587664	0.033495	2.46666	5.99891	0.25	0.04	94.545	0.114282	94.4307	5.75302	100.184
Konnowoc Canal	ell99-04	33.53	0.12	5.85	1.36	0.01	0.04	0.41	0.03	1.62	5.27	0.25	0.03	51.3	99.82		71.7274	0.200172	11.0536	1.94439	0.012912	0.066316	0.573672	0.033495	2.1836	6.34824	0.25	0.03	94.4237	0.112028	94.3117	6.19064	100.502
Konnowoc Canal	ell99-04	33.59	0.08	5.86	1.36	0.02	0.04	0.44	0.01	1.53	5.41	0.21	0.04	50.73	99.32		71.8557	0.133448	11.0725	1.94439	0.025824	0.066316	0.615648	0.011165	2.06229	6.51689	0.21	0.04	94.5542	0.0974402	94.4567	5.465	99.9217
Konnowoc Canal	ell99-04	33.6	0.15	5.92	1.36	0.02	0.04	0.45	0.04	1.69	5.12	0.15	0.03	51.5	100.07		71.8771	0.250215	11.1858	1.94439	0.025824	0.066316	0.62964	0.04466	2.27795	6.16755	0.15	0.03	94.6495	0.0699223	94.5796	6.17054	100.75
Konnowoc Canal	ell99-04	33.48	0.1	5.9	1.37	0.01	0.04	0.42	0.02	1.65	5.38	0.19	0.04	50.43	99.03		71.6204	0.16681	11.148	1.95869	0.012912	0.066316	0.587664	0.02233	2.22404	6.48075	0.19	0.04	94.518	0.0890192	94.429	5.17001	99.599
Konnowoc Canal	ell99-04	33.59	0.14	5.92	1.38	0	0.03	0.41	0.07	1.84	4.93	0.13	0.03	51.49	99.96		71.8557	0.233534	11.1858	1.97299	0	0.049737	0.573672	0.078155	2.48014	5.93868	0.13	0.03	94.5285	0.0615012	94.467	6.17349	100.64
Konnowoc Canal	ell99-04	33.68	0.09	5.98	1.38	0.03	0.02	0.4	0.06	1.98	4.86	0.17	0.05	51.69	100.39		72.0483	0.150129	11.2992	1.97299	0.038736	0.033158	0.55968	0.06699	2.66884	5.85436	0.17	0.05	94.9123	0.0828529	94.8295	6.24939	101.079
Konnowoc Canal	ell99-04	33.63	0.12	5.89	1.39	0.01	0.03	0.42	0	1.61	5.27	0.24	0.03	50.2	98.84		71.9413	0.200172	11.1292	1.98728	0.012912	0.049737	0.587664	0	2.17012	6.34824	0.24	0.03	94.6966	0.107817	94.5888	4.77646	99.3652
Konnowoc Canal	ell99-04	33.69	0.11	5.93	1.4	0.02	0.03	0.43	0.05	1.76	5.33	0.24	0.02	50.5	99.51		72.0696	0.183491	11.2047	2.00158	0.025824	0.049737	0.601656	0.055825	2.3723	6.42052	0.24	0.02	95.2453	0.105562	95.1398	4.91031	100.05
Konnowoc Canal	ell99-04	33.7	0.1	6	1.4	0.03	0.03	0.42	0.03	1.85	5.13	0.18	0.02	50.51	99.4		72.091	0.16681	11.337	2.00158	0.038736	0.049737	0.587664	0.033495	2.49362	6.1796	0.18	0.02	95.1793	0.0802991	95.099	4.83245	99.9314
Konnowoc Canal	ell99-04	33.49	0.12	5.98	1.46	0.01	0.04	0.43	0.05	1.98	4.93	0.22	0.06	50.89	99.66		71.6418	0.200172	11.2992	2.08736	0.012912	0.066316	0.601656	0.055825	2.66884	5.93868	0.22	0.06	94.8528	0.10616	94.7466	5.52139	100.268
Konnowoc Canal	ell99-04	33.25	0.12	5.86	1.67	0	0.02	0.48	0.05	1.9	4.95	0.23	0.05	51.27	99.85		71.1284	0.200172	11.0725	2.3876	0	0.033158	0.671616	0.055825	2.56101	5.96277	0.23	0.05	94.353	0.108116	94.2449	6.2996	100.545
Trapper Creek	tc-89-27c	33.98	0.104	6.06	1.328	0.016	0.027	0.404	0	1.43	4.942	0.155	0.029	50.638	99.113		72.69	0.173482	11.4504	1.89864	0.0206592	0.0447633	0.565277	0	1.9275	5.95313	0.155	0.029	94.9078	0.0718021	94.836	4.80536	99.6414
Trapper Creek	tc-89-27c	34.038	0.147	5.975	1.322	0.012	0.032	0.412	0	1.379	5.244	0.25	0.028	50.62	99.459		72.8141	0.245211	11.2898	1.89006	0.0154944	0.0530528	0.57647	0	1.85875	6.31692	0.25	0.028	95.3378	0.111577	95.2262	4.75561	99.9818
Trapper Creek	tc-89-27c	34.03	0.108	6.029	1.358	0.004	0.038	0.431	0	1.718	4.877	0.265	0.045	50.637	99.54		72.797	0.180155	11.3918	1.94153	0.0051648	0.0630002	0.603055	0	2.31569	5.87483	0.265	0.045	95.4822	0.121726	95.3605	4.69573	100.056
Trapper Creek	tc-89-27c	34.144	0.146	6.066	1.291	0.009	0.029	0.409	0.038	1.735	4.877	0.188	0.029	50.753	99.714		73.0408	0.243543	11.4617	1.84574	0.0116208	0.0480791	0.572273	0.042427	2.33861	5.87483	0.188	0.029	95.6967	0.0856968	95.611	4.60965	100.221
Trapper Creek	tc-89-27c	34.109	0.107	6.059	1.323	0.025	0.018	0.425	0.009	1.535	5.004	0.216	0.044	50.875	99.749		72.966	0.178487	11.4485	1.89149	0.03228	0.0298422	0.59466	0.0100485	2.06903	6.02782	0.216	0.044	95.5081	0.100868	95.4072	4.87823	100.285
Trapper Creek	tc-89-27c	34.055	0.116	5.997	1.359	0.038	0.035	0.407	0.035	1.702	4.752	0.266	0.05	50.938	99.75		72.8505	0.1935	11.3313	1.94296	0.0490656	0.0580265	0.569474	0.0390775	2.29413	5.72426	0.266	0.05	95.3683	0.123274	95.245	5.06189	100.307
Trapper Creek	tc-89-27c	34.136	0.138	6.069	1.295	0.025	0.028	0.423	0	1.785	4.806	0.259	0.046	50.792	99.802		73.0237	0.230198	11.4674	1.85146	0.03228	0.0464212	0.591862	0	2.406	5.78931	0.259	0.046	95.7436	0.119425	95.6242	4.69378	100.318
Trapper Creek	tc-89-27c	33.994	0.111	6.011	1.312	0.021	0.026	0.399	0	1.647	4.751	0.208	0.052	51.28	99.812		72.72	0.185159	11.3578	1.87577	0.0271152	0.0431054	0.558281	0	2.21999	5.72305	0.208	0.052	94.9702	0.0993039	94.8709	5.55251	100.423
Trapper Creek	tc-89-27c	34.148	0.128	5.991	1.36	0.05	0.033	0.402	0	1.651	4.643	0.193	0.043	51.178	99.82		73.0494	0.213517	11.32	1.94439	0.06456	0.0547107	0.562478	0	2.22538	5.59296	0.193	0.043	95.2634	0.0909588	95.1724	5.22229	100.395
Trapper Creek	tc-89-27c	34.03	0.121	6.045	1.358	0.01	0.03	0.423	0.025	1.68	4.917	0.239	0.026	50.919	99.823		72.797	0.20184	11.422	1.94153	0.012912	0.049737	0.591862	0.0279125	2.26447	5.92302	0.239	0.026	95.4973	0.106494	95.3908	4.97999	100.371
Trapper Creek	tc-89-27c	34.119	0.156	6.101	1.318	0.013	0.031	0.425	0.039	1.688	4.759	0.163	0.031	50.982	99.825		72.9874	0.260224	11.5278	1.88434	0.0167856	0.0513949	0.59466	0.0435435	2.27526	5.73269	0.163	0.031	95.5681	0.0756214	95.4925	4.86784	100.36
Trapper Creek	tc-89-27c	33.98	0.157	6.065	1.409	0.016	0.036	0.401	0.002	1.791	4.757	0.14	0.032	51.042	99.828		72.69	0.261892	11.4598	2.01445	0.0206592	0.0596844	0.561079	0.002233	2.41409	5.73028	0.14	0.032	95.3862	0.0661627	95.32	5.06524	100.385
Trapper Creek	tc-89-27c	34.128	0.122	6.044	1.304	0.016	0.036	0.426	0	1.562	5.082	0.208	0.02	50.888	99.836		73.0066	0.203508	11.4201	1.86433	0.0206592	0.0596844	0.596059	0	2.10542	6.12178	0.208	0.02	95.6262	0.0920885	95.5341	4.83338	100.367
Trapper Creek	tc-89-27c	34.297	0.133	5.984	1.322	0.022	0.018	0.414	0	1.721	4.642	0.161	0.045	51.094	99.853		73.3681	0.221857	11.3068	1.89006	0.0284064	0.0298422	0.579269	0	2.31974	5.59175	0.161	0.045	95.5418	0.077936	95.4639	4.9315	100.395
Trapper Creek	tc-89-27c	33.996	0.133	6.048	1.438	0.032	0.032	0.426	0	1.599	4.952	0.204	0.033	50.962	99.855		72.7242	0.221857	11.4277	2.05591	0.0413184	0.0530528	0.596059	0	2.15529	5.96518	0.204	0.033	95.4776	0.0933355	95.3843	5.02334	100.408
Trapper Creek	tc-89-27c	34.087	0.096	6.037	1.358	0.013	0.032	0.411	0.018	1.596	4.993	0.164	0.043	51.011	99.859		72.9189	0.160138	11.4069	1.94153	0.0167856	0.0530528	0.575071	0.020097	2.15125	6.01457	0.164	0.043	95.4653	0.0787482	95.3866	5.02524	100.412
Trapper Creek	tc-89-27c	34.03	0.115	6.045	1.317	0.042	0.035	0.398	0.011	1.387	5.213	0.168	0.044	51.059	99.864		72.797	0.191831	11.422	1.88291	0.0542304	0.0580265	0.556882	0.0122815	1.86954	6.27958	0.168	0.044	95.3363	0.0806579	95.2556	5.17817	100.434
Trapper Creek	tc-89-27c	34.162	0.115	6.078	1.336	0.026	0.039	0.415	0.025	1.451	5.155	0.297	0.028	50.744	99.871		73.0794	0.191831	11.4844	1.91008	0.0335712	0.0646581	0.580668	0.0279125	1.9558	6.20971	0.297	0.028	95.863	0.131366	95.7316	4.65055	100.382
Trapper Creek	tc-89-27c	34.189	0.101	6.067	1.344	0.026	0.016	0.387	0.046	1.637	4.991	0.182	0.033	50.904	99.923		73.1371	0.168478	11.4636	1.92152	0.0335712	0.0265264	0.54149	0.051359	2.20651	6.01216	0.182	0.033	95.7773	0.0840724	95.6932	4.7522	100.445
Trapper Creek	tc-89-27c	34.281	0.125	6.041	1.328	0.002	0.033	0.411	0	1.645	4.878	0.207	0.037	50.969	99.957		73.3339	0.208512	11.4145	1.89864	0.0025824	0.0547107	0.575071	0	2.2173	5.87604	0.207	0.037	95.8252	0.0955006	95.7297	4.74941	100.479
Trapper Creek	tc-89-27c	34.12	0.094	6.062	1.394	0.019	0.028	0.421	0	1.734	4.854	0.186	0.038	51.037	99.987		72.9895	0.156801	11.4541	1.993	0.0245328	0.0464212	0.589063	0	2.33726	5.84713	0.186	0.038	95.6619	0.086884	95.575	4.95728	100.532
Trapper Creek	tc-89-27c	34.173	0.088	6.082	1.354	0	0.034	0.411	0.032	1.826	4.518	0.206	0.047	51.229	100		73.1029	0.146793	11.4919	1.93581	0	0.0563686	0.575071	0.035728	2.46127	5.44238	0.206	0.047	95.5012	0.0973344	95.4039	5.16437	100.568
Trapper Creek	tc-89-27c	34.132	0.129	6.056	1.325	0.043	0.022	0.41	0.015	1.596	4.752	0.246	0.057	51.262	100.045		73.0152	0.215185	11.4428	1.89435	0.0555216	0.0364738	0.573672	0.0167475	2.15125	5.72426	0.246	0.057	95.4284	0.116431	95.312	5.31837	100.63
Trapper Creek	tc-89-27c	34.238	0.115	6.052	1.351	0.023	0.038	0.427	0.019	1.66	4.698	0.2	0.046	51.334	100.201		73.2419	0.191831	11.4353	1.93152	0.0296976	0.0630002	0.597458	0.0212135	2.23751	5.65921	0.2	0.046	95.6546	0.0945826	95.5601	5.21481	100.775
Trapper Creek	tc-89-27c	34.225	0.122	6.084	1.306	0.046	0.024	0.404	0.051	1.742	4.783	0.311	0.044	51.259	100.401		73.2141	0.203508	11.4957	1.86719	0.0593952	0.0397896	0.565277	0.0569415	2.34804	5.7616	0.311	0.044	95.9666	0.140868	95.8257	5.14094	100.967
Bruneau River	brv93-431a	34.8	0.14	6.1	1.35	0.04	0.04	0.46	0.04	2.19	4.87	0.12	0.01	50.2	100.36		74.4442	0.233534	11.5259	1.9301	0.051648	0.066316	0.643632	0.04466	2.9519	5.8664	0.12	0.01	97.8883	0.0527811	97.8355	2.83369	100.669
Bruneau River	brv93-431a	34.8	0.14	6.14	1.34	0.02	0.04	0.48	0.09	2.18	4.97	0.13	0	50.8	101.13		74.4442	0.233534	11.6015	1.9158	0.025824	0.066316	0.671616	0.100485	2.93842	5.98686	0.13	0	98.1145	0.0547368	98.0598	3.44758	101.507
Bruneau River	brv93-431a	34.8	0.1	6.08	1.42	0.02	0.04	0.5	0.08	2	4.97	0.12	0	50.7	100.83		74.4442	0.16681	11.4882	2.03017	0.025824	0.066316	0.6996	0.08932	2.6958	5.98686	0.12	0	97.813	0.0505263	97.7625	3.44455	101.207
Bruneau River	brv93-431a	34.8	0.1	6.1	1.33	0.03	0.04	0.5	0.06	2.15	4.96	0.12	0	50.6	100.79		74.4442	0.16681	11.5259	1.9015	0.038736	0.066316	0.6996	0.06699	2.89799	5.97482	0.12	0	97.9029	0.0505263	97.8523	3.2985	101.151
Bruneau River	brv93-431a	34.7	0.11	6.09	1.4	0.04	0.04	0.45	0.06	2.23	4.89	0.12	0.01	50.3	100.44		74.2302	0.183491	11.5071	2.00158	0.051648	0.066316	0.62964	0.06699	3.00582	5.89049	0.12	0.01	97.7633	0.0527811	97.7105	3.06435	100.775
Bruneau River	brv93-431a	34.8	0.13	6.1	1.37	0.02	0.04	0.46	0	2.06	4.95	0.09	0	50.5	100.52		74.4442	0.216853	11.5259	1.95869	0.025824	0.066316	0.643632	0	2.77667	5.96277	0.09	0	97.7109	0.0378947	97.673	3.19655	100.87
Bruneau River	brv93-431a	34.9	0.14	6.12	1.4	0	0.04	0.45	0.05	2.15	4.77	0.1	0	50.9	101.02		74.6581	0.233534	11.5637	2.00158	0	0.066316	0.62964	0.055825	2.89799	5.74594	0.1	0	97.9526	0.0421053	97.9105	3.49177	101.402
Bruneau River	brv93-431a	34.5	0.14	6.1	1.34	0	0.03	0.47	0.05	2.11	4.95	0.08	0.01	50.6	100.38		73.8024	0.233534	11.5259	1.9158	0	0.049737	0.657624	0.055825	2.84407	5.96277	0.08	0.01	97.1377	0.035939	97.1018	3.68169	100.783
Bruneau River	brv93-431a	35	0.13	6.15	1.32	0.01	0.03	0.45	0.04	2.21	4.76	0.1	0.02	50.4	100.62		74.872	0.216853	11.6204	1.8872	0.012912	0.049737	0.62964	0.04466	2.97886	5.7339	0.1	0.02	98.1662	0.0466148	98.1196	2.8066	100.926
Bruneau River	brv93-431a	34.7	0.17	6.12	1.32	0.05	0.03	0.47	0	2.27	4.93	0.15	0.02	50.3	100.53		74.2302	0.283577	11.5637	1.8872	0.06456	0.049737	0.657624	0	3.05973	5.93868	0.15	0.02	97.9051	0.0676675	97.8374	3.02282	100.86
Bruneau River	brv93-431a	34.7	0.16	6.1	1.25	0.03	0.02	0.46	0.03	1.89	5.1	0.13	0	50.8	100.67		74.2302	0.266896	11.5259	1.78713	0.038736	0.033158	0.643632	0.033495	2.54753	6.14346	0.13	0	97.3802	0.0547368	97.3255	3.75623	101.082
Bruneau River	brv93-431a	34.7	0.16	6.16	1.42	0.01	0.03	0.45	0.09	2.09	4.81	0.13	0.01	50.5	100.56		74.2302	0.266896	11.6393	2.03017	0.012912	0.049737	0.62964	0.100485	2.81711	5.79413	0.13	0.01	97.7106	0.0569916	97.6536	3.26328	100.917
Bruneau River	brv93-431a	34.7	0.11	6.08	1.37	0.02	0.03	0.45	0	2.16	4.88	0.12	0.01	50.7	100.63		74.2302	0.183491	11.4882	1.95869	0.025824	0.049737	0.62964	0	2.91146	5.87845	0.12	0.01	97.4857	0.0527811	97.4329	3.59039	101.023
Bruneau River	brv93-431a	34.9	0.13	6.12	1.29	0.02	0.02	0.43	0.01	2.28	4.8	0.09	0.02	50.7	100.81		74.6581	0.216853	11.5637	1.84431	0.025824	0.033158	0.601656	0.011165	3.07321	5.78208	0.09	0.02	97.9201	0.0424043	97.8777	3.29251	101.17
Bruneau River	brv93-431a	35	0.11	6.19	1.32	0.04	0.02	0.44	0.11	2.11	4.91	0.14	0.01	50.4	100.8		74.872	0.183491	11.696	1.8872	0.051648	0.033158	0.615648	0.122815	2.84407	5.91459	0.14	0.01	98.3706	0.0612022	98.3094	2.79548	101.105
Bruneau River	brv93-431a	35	0.14	6.13	1.37	0.03	0.02	0.44	0.14	2.22	4.7	0.13	0.02	50.7	101.04		74.872	0.233534	11.5826	1.95869	0.038736	0.033158	0.615648	0.15631	2.99234	5.66162	0.13	0.02	98.2947	0.0592464	98.2354	3.14874	101.384
Bruneau River	brv93-431a	34.8	0.13	6.1	1.4	0.02	0.02	0.46	0.02	2.09	4.93	0.13	0.02	50.6	100.72		74.4442	0.216853	11.5259	2.00158	0.025824	0.033158	0.643632	0.02233	2.81711	5.93868	0.13	0.02	97.8193	0.0592464	97.76	3.32361	101.084
Bruneau River	brv93-431a	34.9	0.12	6.11	1.35	0.06	0.02	0.42	0.04	2.14	4.78	0.14	0	50.5	100.58		74.6581	0.200172	11.5448	1.9301	0.077472	0.033158	0.587664	0.04466	2.88451	5.75799	0.14	0	97.8586	0.0589474	97.7997	3.12148	100.921
Bruneau River	brv93-431a	34.7	0.15	6.15	1.38	0.01	0.02	0.46	0.05	2.03	4.99	0.12	0	50.9	100.96		74.2302	0.250215	11.6204	1.97299	0.012912	0.033158	0.643632	0.055825	2.73624	6.01095	0.12	0	97.6866	0.0505263	97.6361	3.73308	101.369
Cougar Point XIII
Prosser	cpb98-15	34.01	0.153	5.948	1.447	0.024	0.022	0.475	0.026	1.972	4.818	0.0118923	0.045	50.891	99.8429		72.7542	0.255219	11.2387	2.06878	0.0309888	0.0364738	0.66462	0.029029	2.65806	5.80376	0.0118923	0.045	95.5968	0.0151538	95.5816	4.78773	100.369
Prosser	cpb98-15	33.769	0.141	6.073	1.369	0.023	0.013	0.48	0.017	1.945	5.102	0.114162	0.043	51.137	100.226		72.2386	0.235202	11.4749	1.95726	0.0296976	0.0215527	0.671616	0.0189805	2.62167	6.14587	0.114162	0.043	95.5726	0.0577639	95.5148	5.29406	100.809
Prosser	cpb98-15	33.776	0.123	6.101	1.515	0.032	0.017	0.483	0.056	2.206	4.714	0.0429135	0.04	51.18	100.286		72.2536	0.205176	11.5278	2.166	0.0413184	0.0281843	0.675814	0.062524	2.97347	5.67848	0.0429135	0.04	95.6953	0.027088	95.6682	5.18867	100.857
Prosser	cpb98-15	33.629	0.131	6.031	1.488	0.012	0.019	0.468	0.056	2.016	4.768	-0.0083008	0.045	51.225	99.8797		71.9392	0.218521	11.3956	2.12739	0.0154944	0.0315001	0.654826	0.062524	2.71737	5.74353	-0.0083008	0.045	94.9426	0.00665149	94.9359	5.55556	100.491
Prosser	cpb98-15	33.523	0.144	6.043	1.43	0.018	0.014	0.444	0.036	1.809	5.327	0.014387	0.058	51.299	100.159		71.7124	0.240206	11.4182	2.04447	0.0232416	0.0232106	0.621245	0.040194	2.43835	6.4169	0.014387	0.058	95.0509	0.0191355	95.0317	5.76243	100.794
Prosser	cpb98-15	33.927	0.134	6.053	1.44	0.011	0.028	0.45	0.03	1.877	4.954	-0.021904	0.038	50.86	99.7801		72.5766	0.223525	11.4371	2.05877	0.0142032	0.0464212	0.62964	0.033495	2.53001	5.96759	-0.021904	0.038	95.5335	-0.000654529	95.5342	4.77042	100.305
Prosser	cpb98-15	33.838	0.135	5.999	1.421	0.01	0.025	0.461	0.039	2.004	4.895	0.0106489	0.042	51.039	99.9186		72.3862	0.225193	11.3351	2.0316	0.012912	0.0414475	0.645031	0.0435435	2.70119	5.89652	0.0106489	0.042	95.3714	0.0139539	95.3575	5.12509	100.483
Prosser	cpb98-15	33.789	0.129	6.032	1.491	0.043	0.027	0.46	0.048	2.15	4.726	-0.0143881	0.047	51.003	99.9306		72.2814	0.215185	11.3975	2.13168	0.0555216	0.0447633	0.643632	0.053592	2.89799	5.69294	-0.0143881	0.047	95.4468	0.00453937	95.4423	5.04319	100.485
Prosser	cpb98-15	33.833	0.135	6.01	1.354	0.034	0.025	0.454	0.022	1.992	4.889	-0.0164014	0.026	50.976	99.7336		72.3756	0.225193	11.3559	1.93581	0.0439008	0.0414475	0.635237	0.024563	2.68502	5.88929	-0.0164014	0.026	95.2215	-0.00104339	95.2226	5.06873	100.291
Prosser	cpb98-15	33.89	0.131	6.024	1.428	0.053	0.013	0.457	0.043	1.982	4.929	0.0194452	0.031	51.214	100.214		72.4975	0.218521	11.3823	2.04161	0.0684336	0.0215527	0.639434	0.0480095	2.67154	5.93747	0.0194452	0.031	95.5769	0.0151773	95.5617	5.22815	100.79
Prosser	cpb98-15	33.934	0.115	5.938	1.446	0.015	0.008	0.462	0.004	2.033	4.71	0.0339214	0.032	51.069	99.7999		72.5916	0.191831	11.2199	2.06735	0.019368	0.0132632	0.64643	0.004466	2.74028	5.67367	0.0339214	0.032	95.234	0.021498	95.2125	5.15461	100.367
Prosser	cpb98-15	33.961	0.14	6.022	1.396	0.023	0.017	0.443	0.076	2.035	4.787	0.110376	0.036	51.46	100.506		72.6494	0.233534	11.3786	1.99586	0.0296976	0.0281843	0.619846	0.084854	2.74298	5.76642	0.110376	0.036	95.6757	0.0545915	95.6211	5.48971	101.111
Prosser	cpb98-15	33.691	0.085	6.056	1.481	0.03	0.036	0.463	0.007	1.782	5.422	0.107903	0.047	51.127	100.335		72.0718	0.141789	11.4428	2.11739	0.038736	0.0596844	0.64783	0.0078155	2.40196	6.53134	0.107903	0.047	95.616	0.0560303	95.56	5.36553	100.926
Prosser	cpb98-15	33.854	0.137	6.043	1.49	0.01	0.022	0.469	0.015	2.253	4.682	0.026641	0.054	51.122	100.178		72.4205	0.22853	11.4182	2.13025	0.012912	0.0364738	0.656225	0.0167475	3.03682	5.63994	0.026641	0.054	95.6773	0.0233931	95.6539	5.08305	100.737
Prosser	cpb98-15	33.715	0.14	6.037	1.529	0.033	0.02	0.463	0.021	2.111	4.721	0.0445061	0.036	51.081	99.9515		72.1231	0.233534	11.4069	2.18601	0.0426096	0.033158	0.64783	0.0234465	2.84542	5.68692	0.0445061	0.036	95.3095	0.0268567	95.2826	5.24633	100.529
Prosser	cpb98-15	33.868	0.135	6.088	1.506	0	0.025	0.46	0	2.114	4.675	0.0891754	0.056	51.091	100.107		72.4504	0.225193	11.5033	2.15313	0	0.0414475	0.643632	0	2.84946	5.6315	0.0891754	0.056	95.6432	0.0501744	95.5931	5.07217	100.665
Prosser	cpb98-15	33.967	0.146	6.031	1.482	0.008	0.019	0.476	0.023	2.139	4.651	0.0658738	0.025	51.017	100.05		72.6622	0.243543	11.3956	2.11882	0.0103296	0.0315001	0.666019	0.0256795	2.88316	5.60259	0.0658738	0.025	95.7303	0.0333733	95.6969	4.89086	100.588
Prosser	cpb98-15	33.713	0.118	6.031	1.46	0.021	0.018	0.461	0.085	1.789	5.084	0.088514	0.045	51.072	99.9855		72.1188	0.196836	11.3956	2.08736	0.0271152	0.0298422	0.645031	0.0949025	2.41139	6.12419	0.088514	0.045	95.2646	0.0474156	95.2172	5.35814	100.575
Prosser	cpb98-15	33.968	0.162	6.05	1.463	0.019	0.029	0.457	0.037	2.14	4.623	0.0844267	0.058	51.251	100.341		72.6643	0.270232	11.4315	2.09165	0.0245328	0.0480791	0.639434	0.0413105	2.88451	5.56887	0.0844267	0.058	95.8069	0.0486259	95.7582	5.14988	100.908
Prosser	cpb98-15	33.758	0.125	5.979	1.466	0.001	0.03	0.456	0	1.828	4.923	0.0633394	0.047	51.22	99.8963		72.2151	0.208512	11.2973	2.09594	0.0012912	0.049737	0.638035	0	2.46396	5.93025	0.0633394	0.047	95.0105	0.0372667	94.9732	5.53231	100.506
Prosser	cpb98-15	33.838	0.153	5.952	1.431	0.038	0.015	0.467	0.078	1.955	4.851	0.111358	0.041	51.579	100.509		72.3862	0.255219	11.2463	2.0459	0.0490656	0.0248685	0.653426	0.087087	2.63514	5.84351	0.111358	0.041	95.3791	0.0561322	95.323	5.82844	101.151
Mabton	cpb98-18	34.091	0.121	6.061	1.47	0.021	0.017	0.453	0.034	2.233	4.753	0.059223	0.029	50.712	100.054		72.9275	0.20184	11.4523	2.10166	0.0271152	0.0281843	0.633838	0.037961	3.00986	5.72546	0.059223	0.029	96.2339	0.0314749	96.2024	4.32706	100.529
Mabton	cpb98-18	33.891	0.157	6.172	1.543	0.01	0.022	0.477	0.077	2.094	4.519	0.0770987	0.025	50.793	99.8571		72.4996	0.261892	11.662	2.20603	0.012912	0.0364738	0.667418	0.0859705	2.8225	5.44359	0.0770987	0.025	95.8005	0.0380996	95.7624	4.60031	100.363
Mabton	cpb98-18	33.786	0.101	5.979	1.469	0.019	0.022	0.467	0.053	2.013	5.123	0.0492521	0.053	51.03	100.164		72.275	0.168478	11.2973	2.10023	0.0245328	0.0364738	0.653426	0.0591745	2.71332	6.17117	0.0492521	0.053	95.6014	0.0326881	95.5687	5.16378	100.732
Mabton	cpb98-18	33.916	0.119	5.91	1.339	0.018	0.016	0.415	0	2.092	4.541	0.168035	0.035	51.181	99.75		72.5531	0.198504	11.1669	1.91437	0.0232416	0.0265264	0.580668	0	2.81981	5.47009	0.168035	0.035	94.9563	0.0786434	94.8776	5.47527	100.353
Mabton	cpb98-18	34.065	0.118	5.927	1.342	0.015	0.013	0.445	0.019	2.073	4.727	0.0909478	0.042	50.946	99.8229		72.8718	0.196836	11.1991	1.91866	0.019368	0.0215527	0.622644	0.0212135	2.7942	5.69414	0.0909478	0.042	95.4925	0.0477639	95.4447	4.91931	100.364
Mabton	cpb98-18	33.694	0.112	5.962	1.253	0.021	0.007	0.39	0.047	1.725	5.039	0.114538	0.048	51.255	99.6675		72.0782	0.186827	11.2652	1.79141	0.0271152	0.0116053	0.545688	0.0524755	2.32513	6.06998	0.114538	0.048	94.5162	0.0590494	94.4571	5.85553	100.313
Mabton	cpb98-18	33.852	0.146	5.953	1.447	0.044	0.029	0.458	0.011	1.806	5.209	0.0648923	0.031	50.918	99.9689		72.4162	0.243543	11.2482	2.06878	0.0568128	0.0480791	0.640834	0.0122815	2.43431	6.27476	0.0648923	0.031	95.5397	0.0343129	95.5054	5.01525	100.521
Mabton	cpb98-18	33.53	0.131	5.92	1.404	0.021	0	0.446	0.041	1.823	5.046	0.0751436	0.044	50.986	99.4671		71.7274	0.218521	11.1858	2.0073	0.0271152	0	0.624043	0.0457765	2.45722	6.07841	0.0751436	0.044	94.4907	0.0415605	94.4492	5.63904	100.088
Mabton	cpb98-18	33.729	0.16	5.953	1.423	0.022	0.014	0.486	0.04	1.921	4.825	0.0785907	0.041	51.104	99.7966		72.1531	0.266896	11.2482	2.03446	0.0284064	0.0232106	0.680011	0.04466	2.58932	5.8122	0.0785907	0.041	95	0.0423355	94.9577	5.43759	100.395
Mabton	cpb98-18	33.766	0.109	6.036	1.437	0.02	0.023	0.47	0.055	2.025	4.883	0.0371833	0.032	50.94	99.8332		72.2322	0.181823	11.405	2.05448	0.025824	0.0381317	0.657624	0.0614075	2.7295	5.88206	0.0371833	0.032	95.3373	0.0228715	95.3144	5.07742	100.392
Mabton	cpb98-18	34.012	0.093	5.984	1.404	0.04	0.015	0.451	0.061	2.25	4.526	0.0981436	0.041	50.843	99.8181		72.7585	0.155133	11.3068	2.0073	0.051648	0.0248685	0.631039	0.0681065	3.03277	5.45202	0.0981436	0.041	95.6273	0.0505683	95.5767	4.76541	100.342
Mabton	cpb98-18	33.716	0.125	6.066	1.473	0.023	0.022	0.477	0.051	2.149	4.692	0.0681357	0.053	50.833	99.7481		72.1253	0.208512	11.4617	2.10595	0.0296976	0.0364738	0.667418	0.0569415	2.89664	5.65198	0.0681357	0.053	95.3617	0.0406391	95.3211	4.97425	100.295
Mabton	cpb98-18	33.591	0.122	5.933	1.42	0	0.004	0.462	0.069	1.947	4.796	0.071678	0.04	50.891	99.3467		71.8579	0.203508	11.2104	2.03017	0	0.0066316	0.64643	0.0770385	2.62436	5.77726	0.071678	0.04	94.5454	0.0391994	94.5062	5.43943	99.9456
Mabton	cpb98-18	33.875	0.131	5.965	1.427	0.02	0.014	0.469	0.019	2.06	4.955	0.120474	0.036	50.71	99.8015		72.4654	0.218521	11.2709	2.04018	0.025824	0.0232106	0.656225	0.0212135	2.77667	5.96879	0.120474	0.036	95.6234	0.0588433	95.5645	4.76034	100.325
Mabton	cpb98-18	33.311	0.093	5.914	1.357	0.016	0.004	0.432	0	1.99	4.736	0.0615113	0.039	50.693	98.6465		71.2589	0.155133	11.1745	1.9401	0.0206592	0.0066316	0.604454	0	2.68232	5.70499	0.0615113	0.039	93.6482	0.0346932	93.6135	5.65605	99.2696
Mabton	cpb98-18	29.953	0.01	10.277	0.126	0.01	0	0.524	1.302	3.241	7.879	-0.0036666	0	46.93	100.248		64.0755	0.016681	19.4184	0.180142	0.012912	0	0.733181	1.45368	4.36854	9.49104	-0.0036666	0	99.7464	-0.00154383	99.7479	0.556497	100.304
Mabton	cpb98-18	33.673	0.15	5.982	1.458	0.031	0.014	0.453	0.038	1.912	4.884	0.127572	0.052	50.998	99.7726		72.0333	0.250215	11.303	2.0845	0.0400272	0.0232106	0.633838	0.042427	2.57718	5.88327	0.127572	0.052	95.0505	0.0654395	94.9851	5.37976	100.365
Mabton	cpb98-18	33.603	0.128	5.951	1.429	0.01	0.021	0.44	0.026	2.201	4.778	0.0974161	0.048	50.678	99.4104		71.8835	0.213517	11.2444	2.04304	0.012912	0.0348159	0.615648	0.029029	2.96673	5.75558	0.0974161	0.048	94.9446	0.0518403	94.8928	5.07617	99.969
Mabton	cpb98-18	33.44	0.132	5.999	1.497	0.008	0.01	0.492	0.025	2.014	4.849	0.0854373	0.045	50.912	99.5084		71.5348	0.220189	11.3351	2.14026	0.0103296	0.016579	0.688406	0.0279125	2.71467	5.84111	0.0854373	0.045	94.6598	0.0461202	94.6137	5.50041	100.114
Mabton	cpb98-18	33.651	0.11	6.006	1.379	0.027	0	0.428	0.014	1.985	4.717	0.131871	0.038	51.387	99.8739		71.9862	0.183491	11.3483	1.97156	0.0348624	0	0.598858	0.015631	2.67558	5.6821	0.131871	0.038	94.6665	0.0640929	94.6024	5.92424	100.527
Mabton	cpb98-18	33.786	0.124	5.933	1.524	0.03	0.019	0.442	0.014	1.901	4.929	0.0686516	0.055	50.516	99.3417		72.275	0.206844	11.2104	2.17886	0.038736	0.0315001	0.618446	0.015631	2.56236	5.93747	0.0686516	0.055	95.1989	0.0413073	95.1576	4.70085	99.8585
Mabton	cpb98-18	33.789	0.149	6	1.38	0.043	0.024	0.432	0.005	1.813	4.956	0.127842	0.045	50.936	99.6998		72.2814	0.248547	11.337	1.97299	0.0555216	0.0397896	0.604454	0.0055825	2.44374	5.97	0.127842	0.045	95.1319	0.0639748	95.0679	5.20473	100.273
Bruneau River	brv95-838	35	0.13	6.07	1.51	0.02	0.04	0.5	0.03	1.92	4.88	0.09	0.03	50	100.22		74.872	0.216853	11.4693	2.15885	0.025824	0.066316	0.6996	0.033495	2.58797	5.87845	0.09	0.03	98.1286	0.0446591	98.084	2.39665	100.481
Bruneau River	brv95-838	34.8	0.11	6.01	1.51	0.04	0.03	0.51	0.06	1.78	5.14	0.13	0.03	49.1	99.25		74.4442	0.183491	11.3559	2.15885	0.051648	0.049737	0.713592	0.06699	2.39926	6.19164	0.13	0.03	97.7753	0.0615012	97.7138	1.72188	99.4356
Bruneau River	brv95-838	35.1	0.1	6.08	1.42	0.03	0.03	0.52	0.01	1.74	5.39	0.14	0.02	50.1	100.68		75.0859	0.16681	11.4882	2.03017	0.038736	0.049737	0.727584	0.011165	2.34535	6.49279	0.14	0.02	98.5964	0.063457	98.533	2.40897	100.942
Bruneau River	brv95-838	35	0.13	6.03	1.42	0.03	0.03	0.48	0	1.99	4.99	0.15	0.03	49.8	100.08		74.872	0.216853	11.3937	2.03017	0.038736	0.049737	0.671616	0	2.68232	6.01095	0.15	0.03	98.1461	0.0699223	98.0762	2.24794	100.324
Bruneau River	brv95-838	35	0.1	6.06	1.39	0.02	0.02	0.54	0.03	1.76	5.31	0.16	0.03	49.9	100.32		74.872	0.16681	11.4504	1.98728	0.025824	0.033158	0.755568	0.033495	2.3723	6.39643	0.16	0.03	98.2832	0.0741328	98.2091	2.36834	100.577
Bruneau River	brv95-838	35.1	0.1	6.06	1.41	0.02	0.02	0.5	0.03	1.82	5.13	0.1	0.02	50.3	100.61		75.0859	0.16681	11.4504	2.01588	0.025824	0.033158	0.6996	0.033495	2.45318	6.1796	0.1	0.02	98.2638	0.0466148	98.2172	2.68546	100.903
Bruneau River	brv95-838	35.2	0.11	6.09	1.42	0.02	0.02	0.51	0.04	2.02	4.72	0.17	0.05	50.2	100.57		75.2998	0.183491	11.5071	2.03017	0.025824	0.033158	0.713592	0.04466	2.72276	5.68571	0.17	0.05	98.4663	0.0828529	98.3834	2.4535	100.837
Bruneau River	brv95-838	35.3	0.12	6.06	1.45	0.03	0.02	0.5	0.1	2.12	4.83	0.1	0.05	50.2	100.88		75.5138	0.200172	11.4504	2.07306	0.038736	0.033158	0.6996	0.11165	2.85755	5.81822	0.1	0.05	98.9463	0.0533792	98.8929	2.22904	101.122
Bruneau River	brv95-838	34.9	0.12	6.03	1.45	0.02	0.02	0.48	0.08	1.9	5.06	0.04	0.01	49.7	99.81		74.6581	0.200172	11.3937	2.07306	0.025824	0.033158	0.671616	0.08932	2.56101	6.09528	0.04	0.01	97.8512	0.0190969	97.8321	2.21873	100.051
Bruneau River	brv95-838	34.9	0.09	6	1.44	0.03	0.02	0.51	0.02	1.87	5.06	0.09	0.03	49.8	99.86		74.6581	0.150129	11.337	2.05877	0.038736	0.033158	0.713592	0.02233	2.52057	6.09528	0.09	0.03	97.7476	0.0446591	97.703	2.42027	100.123
Bruneau River	brv95-838	35.1	0.12	6.13	1.51	0.04	0.02	0.5	0.06	2.1	4.74	0.18	0.04	49.9	100.44		75.0859	0.200172	11.5826	2.15885	0.051648	0.033158	0.6996	0.06699	2.83059	5.7098	0.18	0.04	98.6394	0.0848086	98.5546	2.11471	100.669
Bruneau River	brv95-838	35.2	0.14	6.17	1.54	0.03	0.02	0.45	0.02	2.15	4.68	0.11	0.03	50	100.54		75.2998	0.233534	11.6582	2.20174	0.038736	0.033158	0.62964	0.02233	2.89799	5.63753	0.11	0.03	98.7927	0.0530802	98.7396	2.01901	100.759
Bruneau River	brv95-838	35.1	0.12	6.11	1.48	0	0.02	0.53	0.05	1.94	5.28	0.15	0.03	49.9	100.71		75.0859	0.200172	11.5448	2.11596	0	0.033158	0.741576	0.055825	2.61493	6.36029	0.15	0.03	98.9327	0.0699223	98.8627	2.07172	100.934
Bruneau River	brv95-838	35	0.13	6.09	1.42	0.04	0.02	0.51	0.03	1.89	5.1	0.17	0.04	50.2	100.64		74.872	0.216853	11.5071	2.03017	0.051648	0.033158	0.713592	0.033495	2.54753	6.14346	0.17	0.04	98.359	0.0805981	98.2784	2.65043	100.929
Bruneau River	brv95-838	35.1	0.08	6.12	1.52	0.01	0.02	0.49	0.03	2	5.01	0.11	0.01	50	100.5		75.0859	0.133448	11.5637	2.17314	0.012912	0.033158	0.685608	0.033495	2.6958	6.03505	0.11	0.01	98.5723	0.0485706	98.5237	2.21691	100.741
Bruneau River	brv95-838	34.9	0.11	5.97	1.44	0.04	0.02	0.5	0.03	1.72	5.27	0.08	0.02	49.8	99.9		74.6581	0.183491	11.2803	2.05877	0.051648	0.033158	0.6996	0.033495	2.31839	6.34824	0.08	0.02	97.7652	0.0381938	97.727	2.43824	100.165
Bruneau River	brv95-838	34.9	0.13	6.13	1.53	0.02	0.02	0.52	0.07	1.68	5.39	0.15	0.02	50	100.56		74.6581	0.216853	11.5826	2.18744	0.025824	0.033158	0.727584	0.078155	2.26447	6.49279	0.15	0.02	98.437	0.0676675	98.3693	2.45807	100.827
Bruneau River	brv95-838	35	0.15	6.1	1.49	0	0.01	0.5	0.06	1.94	5.05	0.13	0.03	49.8	100.26		74.872	0.250215	11.5259	2.13025	0	0.016579	0.6996	0.06699	2.61493	6.08323	0.13	0.03	98.4197	0.0615012	98.3582	2.13306	100.491
Bruneau River	brv95-838	35.1	0.11	6.07	1.44	0.02	0.01	0.53	0.03	2.02	5.06	0.12	0.04	50	100.55		75.0859	0.183491	11.4693	2.05877	0.025824	0.016579	0.741576	0.033495	2.72276	6.09528	0.12	0.04	98.593	0.0595455	98.5334	2.26225	100.796
Bruneau River	brv95-838	35.2	0.1	6.02	1.43	0.01	0.01	0.53	0.04	1.73	5.46	0.09	0.02	49.7	100.34		75.2998	0.16681	11.3748	2.04447	0.012912	0.016579	0.741576	0.04466	2.33187	6.57712	0.09	0.02	98.7206	0.0424043	98.6782	1.86305	100.541
Bruneau River	brv95-838	35.1	0.13	6.09	1.43	0.03	0.01	0.46	0.04	2.19	4.77	0.16	0.04	49.9	100.35		75.0859	0.216853	11.5071	2.04447	0.038736	0.016579	0.643632	0.04466	2.9519	5.74594	0.16	0.04	98.4957	0.0763876	98.4194	2.16557	100.585
Trapper Creek	tc-89-31a	33.969	0.079	6.033	1.425	0	0.017	0.452	0.015	1.722	4.572	0.208	0.04	50.228	98.76		72.6665	0.13178	11.3994	2.03732	0	0.0281843	0.632438	0.0167475	2.32108	5.50743	0.208	0.04	94.9888	0.0965981	94.8922	4.34504	99.2373
Trapper Creek	tc-89-31a	34.131	0.122	5.949	1.346	0.036	0.02	0.403	0.013	1.63	4.997	0.266	0.047	50.313	99.273		73.013	0.203508	11.2406	1.92438	0.0464832	0.033158	0.563878	0.0145145	2.19708	6.01939	0.266	0.047	95.5691	0.122598	95.4465	4.29862	99.7451
Trapper Creek	tc-89-31a	33.966	0.147	6.12	1.478	0.011	0.013	0.464	0	1.762	4.611	0.246	0.042	50.696	99.556		72.6601	0.245211	11.5637	2.1131	0.0142032	0.0215527	0.649229	0	2.375	5.55441	0.246	0.042	95.4845	0.113049	95.3715	4.7014	100.073
Trapper Creek	tc-89-31a	33.967	0.144	6.078	1.435	0.037	0.016	0.451	0	1.809	4.451	0.244	0.053	50.903	99.588		72.6622	0.240206	11.4844	2.05162	0.0477744	0.0265264	0.631039	0	2.43835	5.36167	0.244	0.053	95.2408	0.114687	95.1261	5.01346	100.14
Trapper Creek	tc-89-31a	34.038	0.109	6.059	1.453	0.05	0.017	0.433	0.057	1.736	4.393	0.267	0.036	50.966	99.614		72.8141	0.181823	11.4485	2.07735	0.06456	0.0281843	0.605854	0.0636405	2.33995	5.29181	0.267	0.036	95.2187	0.120538	95.0982	5.07405	100.172
Trapper Creek	tc-89-31a	34.252	0.095	6.039	1.443	0.013	0.019	0.451	0.065	1.757	4.729	0.222	0.042	50.542	99.669		73.2719	0.158469	11.4107	2.06306	0.0167856	0.0315001	0.631039	0.0725725	2.36826	5.69655	0.222	0.042	95.9848	0.102944	95.8819	4.25425	100.136
Trapper Creek	tc-89-31a	34.112	0.121	5.998	1.47	0.026	0.017	0.457	0.025	1.766	4.706	0.24	0.039	50.717	99.694		72.9724	0.20184	11.3332	2.10166	0.0335712	0.0281843	0.639434	0.0279125	2.38039	5.66885	0.24	0.039	95.6665	0.109846	95.5566	4.64833	100.205
Trapper Creek	tc-89-31a	34.068	0.139	6.084	1.502	0.019	0.014	0.459	0	1.846	4.469	0.21	0.047	50.841	99.698		72.8783	0.231866	11.4957	2.14741	0.0245328	0.0232106	0.642233	0	2.48822	5.38336	0.21	0.047	95.5718	0.0990186	95.4728	4.74714	100.22
Trapper Creek	tc-89-31a	34.098	0.091	6.014	1.467	0.024	0.023	0.465	0.043	1.829	4.655	0.078	0.04	50.882	99.709		72.9424	0.151797	11.3635	2.09737	0.0309888	0.0381317	0.650628	0.0480095	2.46531	5.60741	0.078	0.04	95.5135	0.0418613	95.4717	4.76075	100.232
Trapper Creek	tc-89-31a	33.931	0.112	6.079	1.42	0.005	0.009	0.441	0.008	1.875	4.487	0.216	0.047	51.093	99.723		72.5852	0.186827	11.4863	2.03017	0.006456	0.0149211	0.617047	0.008932	2.52731	5.40504	0.216	0.047	95.1312	0.101545	95.0296	5.27385	100.303
Trapper Creek	tc-89-31a	34.159	0.101	6.054	1.464	0.024	0.024	0.451	0.001	1.853	4.574	0.203	0.026	50.813	99.747		73.0729	0.168478	11.439	2.09308	0.0309888	0.0397896	0.631039	0.0011165	2.49766	5.50984	0.203	0.026	95.713	0.0913361	95.6216	4.63482	100.256
Trapper Creek	tc-89-31a	34.05	0.146	6.095	1.493	0	0.021	0.436	0.029	1.785	4.664	0.231	0.049	50.748	99.747		72.8398	0.243543	11.5165	2.13454	0	0.0348159	0.610051	0.0323785	2.406	5.61825	0.231	0.049	95.7158	0.108312	95.6075	4.65066	100.258
Trapper Creek	tc-89-31a	34.065	0.125	6.034	1.464	0.015	0.017	0.46	0.031	1.837	4.421	0.236	0.03	51.085	99.82		72.8718	0.208512	11.4012	2.09308	0.019368	0.0281843	0.643632	0.0346115	2.47609	5.32554	0.236	0.03	95.3681	0.106133	95.262	5.12156	100.384
Trapper Creek	tc-89-31a	34.147	0.09	6.091	1.413	0.025	0.004	0.459	0.029	1.562	4.978	0.241	0.053	50.766	99.858		73.0473	0.150129	11.5089	2.02017	0.03228	0.0066316	0.642233	0.0323785	2.10542	5.9965	0.241	0.053	95.8359	0.113424	95.7225	4.64615	100.369
Trapper Creek	tc-89-31a	33.891	0.107	6.121	1.469	0.035	0.022	0.459	0	1.887	4.506	0.198	0.047	51.152	99.894		72.4996	0.178487	11.5656	2.10023	0.045192	0.0364738	0.642233	0	2.54349	5.42793	0.198	0.047	95.2843	0.0939659	95.1903	5.28545	100.476
Trapper Creek	tc-89-31a	34.358	0.114	6.079	1.408	0.025	0.019	0.464	0.004	1.402	4.913	0.201	0.035	50.891	99.913		73.4986	0.190163	11.4863	2.01302	0.03228	0.0315001	0.649229	0.004466	1.88976	5.9182	0.201	0.035	95.9495	0.0925233	95.857	4.55672	100.414
Trapper Creek	tc-89-31a	33.992	0.108	6.029	1.472	0.035	0.028	0.482	0.027	1.846	4.515	0.222	0.034	51.128	99.918		72.7157	0.180155	11.3918	2.10452	0.045192	0.0464212	0.674414	0.0301455	2.48822	5.43877	0.222	0.034	95.3713	0.10114	95.2702	5.22259	100.493
Trapper Creek	tc-89-31a	34.181	0.135	6.074	1.46	0.021	0.027	0.473	0.013	1.856	4.571	0.204	0.022	50.962	99.999		73.12	0.225193	11.4768	2.08736	0.0271152	0.0447633	0.661822	0.0145145	2.5017	5.50623	0.204	0.022	95.8915	0.0908553	95.8007	4.71689	100.518
Trapper Creek	tc-89-31a	34.195	0.093	6.078	1.462	0.004	0.02	0.436	0.035	1.829	4.451	0.234	0.037	51.202	100.076		73.1499	0.155133	11.4844	2.09022	0.0051648	0.033158	0.610051	0.0390775	2.46531	5.36167	0.234	0.037	95.6651	0.106869	95.5582	5.07623	100.634
Trapper Creek	tc-89-31a	34.091	0.121	6.115	1.512	0.026	0.013	0.464	0.025	1.539	4.964	0.237	0.047	51.172	100.326		72.9275	0.20184	11.5543	2.16171	0.0335712	0.0215527	0.649229	0.0279125	2.07442	5.97963	0.237	0.047	95.9156	0.110387	95.8052	5.07959	100.885
Tuff of Wooden Shoe Butte
The Gap	ell99-08	33.41	0.14	5.76	1.17	0.02	0.05	0.39	0.07	1.61	4.95	0.26	0.01	51	98.84		71.4707	0.233534	10.8835	1.67275	0.025824	0.082895	0.545688	0.078155	2.17012	5.96277	0.26	0.01	93.3959	0.111728	93.2842	6.24416	99.5284
The Gap	ell99-08	33.19	0.18	5.68	1.21	0.02	0.05	0.4	0.06	1.72	4.71	0.17	0.03	50.77	98.19		71	0.300258	10.7324	1.72994	0.025824	0.082895	0.55968	0.06699	2.31839	5.67367	0.17	0.03	92.69	0.0783433	92.6117	6.26952	98.8812
The Gap	ell99-08	33.57	0.12	5.89	1.26	0.04	0.04	0.42	0.02	1.64	5.14	0.24	0.02	51.65	100.05		71.8129	0.200172	11.1292	1.80142	0.051648	0.066316	0.587664	0.02233	2.21056	6.19164	0.24	0.02	94.3339	0.105562	94.2283	6.54327	100.772
The Gap	ell99-08	33.48	0.16	5.83	1.26	0.02	0.04	0.39	0.03	1.8	4.92	0.2	0	50	98.13		71.6204	0.266896	11.0158	1.80142	0.025824	0.066316	0.545688	0.033495	2.42622	5.92663	0.2	0	93.9287	0.0842105	93.8445	4.81508	98.6596
The Gap	ell99-08	33.89	0.17	5.92	1.28	0	0.05	0.41	0.01	1.84	4.68	0.18	0.02	51.42	99.87		72.4975	0.283577	11.1858	1.83002	0	0.082895	0.573672	0.011165	2.48014	5.63753	0.18	0.02	94.7823	0.0802991	94.702	5.8078	100.51
The Gap	ell99-08	33.4	0.09	5.81	1.3	0.03	0.03	0.37	0	2.05	4.74	0.29	0.08	51.4	99.59		71.4493	0.150129	10.978	1.85861	0.038736	0.049737	0.517704	0	2.7632	5.7098	0.29	0.08	93.8852	0.140144	93.745	6.56948	100.315
The Gap	ell99-08	33.18	0.2	5.81	1.31	0.06	0.06	0.48	0	1.59	5.17	0.17	0.03	50.58	98.64		70.9787	0.33362	10.978	1.87291	0.077472	0.099474	0.671616	0	2.14316	6.22778	0.17	0.03	93.5827	0.0783433	93.5043	5.77153	99.2759
The Gap	ell99-08	33.22	0.15	5.88	1.33	0.04	0.06	0.46	0.05	1.89	4.65	0.14	0.02	51.53	99.42		71.0642	0.250215	11.1103	1.9015	0.051648	0.099474	0.643632	0.055825	2.54753	5.60139	0.14	0.02	93.4857	0.063457	93.4222	6.74139	100.164
The Gap	ell99-08	33.58	0.12	5.89	1.34	0.01	0.05	0.4	0.05	1.71	5.16	0.2	0.02	50.66	99.19		71.8343	0.200172	11.1292	1.9158	0.012912	0.082895	0.55968	0.055825	2.30491	6.21574	0.2	0.02	94.5314	0.0887201	94.4427	5.33454	99.7772
The Gap	ell99-08	33.45	0.15	5.93	1.46	0.03	0.04	0.49	0	1.78	4.88	0.21	0.02	51.07	99.51		71.5562	0.250215	11.2047	2.08736	0.038736	0.066316	0.685608	0	2.39926	5.87845	0.21	0.02	94.3969	0.0929306	94.304	5.85063	100.155
The Gap	ell99-08	33.59	0.16	5.92	1.46	0.02	0.03	0.46	0.03	1.89	4.83	0.21	0.03	51.12	99.75		71.8557	0.266896	11.1858	2.08736	0.025824	0.049737	0.643632	0.033495	2.54753	5.81822	0.21	0.03	94.7543	0.0951854	94.6591	5.72113	100.38
The Gap	ell99-08	33.55	0.16	5.96	1.49	0.02	0.03	0.45	0.06	2.03	4.49	0.19	0.03	50.87	99.33		71.7702	0.266896	11.2614	2.13025	0.025824	0.049737	0.62964	0.06699	2.73624	5.40865	0.19	0.03	94.5658	0.0867644	94.479	5.45118	99.9302
The Gap	ell99-08	33.22	0.13	5.92	1.54	0.03	0.03	0.48	0.03	1.97	4.87	0.22	0.03	50.7	99.17		71.0642	0.216853	11.1858	2.20174	0.038736	0.049737	0.671616	0.033495	2.65536	5.8664	0.22	0.03	94.234	0.099396	94.1346	5.65871	99.7933
The Gap	ell99-08	33.12	0.21	6.05	1.55	0.04	0.1	0.57	0.08	1.74	4.89	0.16	0.03	50.08	98.62		70.8503	0.350301	11.4315	2.21604	0.051648	0.16579	0.797544	0.08932	2.34535	5.89049	0.16	0.03	94.3783	0.0741328	94.3041	4.84923	99.1534
The Gap	ell99-08	33.06	0.15	5.69	1.84	0.02	0.01	0.45	0.04	1.73	4.6	0.2	0.03	51.56	99.38		70.722	0.250215	10.7513	2.63065	0.025824	0.016579	0.62964	0.04466	2.33187	5.54116	0.2	0.03	93.1738	0.0909749	93.0828	7.07825	100.161
Trapper Creek	tc-90-19	33.96	0.148	5.95	1.258	0.036	0.043	0.401	0.021	1.696	4.985	0.201	0.03	50.38	99.109		72.6472	0.246879	11.2425	1.79856	0.0464832	0.0712897	0.561079	0.0234465	2.28604	6.00493	0.201	0.03	95.1595	0.091396	95.0681	4.53983	99.6079
Trapper Creek	tc-90-19	34.112	0.114	5.95	1.214	0.033	0.031	0.397	0.046	1.883	4.765	0.053	0.037	50.611	99.246		72.9724	0.190163	11.2425	1.73566	0.0426096	0.0513949	0.555482	0.051359	2.5381	5.73992	0.053	0.037	95.2096	0.0306585	95.1789	4.56922	99.7482
Trapper Creek	tc-90-19	33.953	0.118	5.997	1.336	0.038	0.05	0.421	0.041	1.757	4.993	0.136	0.025	50.467	99.332		72.6323	0.196836	11.3313	1.91008	0.0490656	0.082895	0.589063	0.0457765	2.36826	6.01457	0.136	0.025	95.3811	0.0629001	95.3182	4.50926	99.8275
Trapper Creek	tc-90-19	33.796	0.145	5.985	1.308	0.033	0.044	0.404	0.021	1.618	5.329	0.135	0.029	50.554	99.401		72.2964	0.241874	11.3087	1.87005	0.0426096	0.0729476	0.565277	0.0234465	2.1809	6.41931	0.135	0.029	95.1855	0.063381	95.1221	4.80755	99.9296
Trapper Creek	tc-90-19	34.067	0.121	5.946	1.275	0.008	0.04	0.39	0.043	1.817	4.871	0.142	0.025	50.702	99.447		72.8761	0.20184	11.235	1.82287	0.0103296	0.066316	0.545688	0.0480095	2.44913	5.86761	0.142	0.025	95.2899	0.0654265	95.2245	4.74413	99.9686
Trapper Creek	tc-90-19	34.188	0.143	5.976	1.326	0.008	0.029	0.396	0.058	1.686	5.222	0.197	0.029	50.203	99.461		73.135	0.238538	11.2917	1.89578	0.0103296	0.0480791	0.554083	0.064757	2.27256	6.29042	0.197	0.029	96.0272	0.0894863	95.9377	3.95745	99.8951
Trapper Creek	tc-90-19	33.569	0.183	6.18	1.72	0.012	0.07	0.611	0.05	1.845	4.897	0.062	0.024	50.25	99.473		71.8108	0.305262	11.6771	2.45908	0.0154944	0.116053	0.854911	0.055825	2.48688	5.89893	0.062	0.024	95.7663	0.0315168	95.7348	4.19923	99.9341
Trapper Creek	tc-90-19	33.766	0.171	6.109	1.619	0.014	0.052	0.526	0.075	1.927	4.563	0.131	0.018	50.516	99.487		72.2322	0.285245	11.543	2.31468	0.0180768	0.0862108	0.735979	0.0837375	2.5974	5.49659	0.131	0.018	95.5421	0.0592165	95.4829	4.49841	99.9813
Trapper Creek	tc-90-19	34.102	0.15	5.968	1.31	0.016	0.037	0.388	0.078	1.525	5.583	0.149	0.027	50.157	99.49		72.951	0.250215	11.2765	1.87291	0.0206592	0.0613423	0.54289	0.087087	2.05555	6.72528	0.149	0.027	96.0195	0.0688248	95.9506	3.97548	99.9261
Trapper Creek	tc-90-19	34.259	0.109	5.981	1.254	0.022	0.047	0.394	0.032	1.824	4.89	0.099	0.046	50.541	99.498		73.2869	0.181823	11.3011	1.79284	0.0284064	0.0779213	0.551285	0.035728	2.45857	5.89049	0.099	0.046	95.75	0.0520563	95.698	4.26878	99.9667
Trapper Creek	tc-90-19	33.983	0.131	6.005	1.258	0.019	0.043	0.408	0.047	1.511	5.373	0.182	0.022	50.52	99.502		72.6964	0.218521	11.3464	1.79856	0.0245328	0.0712897	0.570874	0.0524755	2.03668	6.47232	0.182	0.022	95.4921	0.0815921	95.4105	4.59664	100.007
Trapper Creek	tc-90-19	33.394	0.204	6.224	1.723	0.011	0.075	0.612	0.066	1.754	4.934	0.125	0.019	50.362	99.503		71.4364	0.340292	11.7602	2.46337	0.0142032	0.124342	0.85631	0.073689	2.36422	5.9435	0.125	0.019	95.5206	0.0569157	95.4637	4.53802	100.002
Trapper Creek	tc-90-19	34	0.184	6.029	1.501	0.015	0.05	0.447	0.06	1.787	5.063	0.159	0.026	50.19	99.511		72.7328	0.30693	11.3918	2.14598	0.019368	0.082895	0.625442	0.06699	2.4087	6.09889	0.159	0.026	96.0648	0.0728098	95.992	3.95264	99.9446
Trapper Creek	tc-90-19	34.263	0.162	5.999	1.247	0.022	0.042	0.384	0.025	1.918	4.682	0.099	0.023	50.677	99.543		73.2954	0.270232	11.3351	1.78284	0.0284064	0.0696318	0.537293	0.0279125	2.58527	5.63994	0.099	0.023	95.694	0.0468702	95.6472	4.37657	100.024
Trapper Creek	tc-90-19	33.925	0.171	6.087	1.511	0.042	0.058	0.481	0.082	1.507	5.371	0.207	0.032	50.08	99.554		72.5724	0.285245	11.5014	2.16028	0.0542304	0.0961582	0.673015	0.091553	2.03129	6.46991	0.207	0.032	96.1744	0.0943732	96.08	3.90191	99.982
Trapper Creek	tc-90-19	34.231	0.17	5.949	1.246	0.037	0.037	0.38	0.017	1.745	5.076	0.131	0.033	50.535	99.587		73.227	0.283577	11.2406	1.78141	0.0477744	0.0613423	0.531696	0.0189805	2.35209	6.11455	0.131	0.033	95.823	0.0625987	95.7604	4.29866	100.059
Trapper Creek	tc-90-19	34.101	0.167	6.02	1.323	0.019	0.046	0.379	0	1.825	4.785	0.204	0.015	50.71	99.594		72.9489	0.278573	11.3748	1.89149	0.0245328	0.0762634	0.530297	0	2.45992	5.76401	0.204	0.015	95.5677	0.0892769	95.4785	4.62376	100.102
Trapper Creek	tc-90-19	34.009	0.142	5.987	1.388	0.035	0.046	0.413	0.039	1.841	4.981	0.1	0.017	50.609	99.607		72.7521	0.23687	11.3124	1.98442	0.045192	0.0762634	0.57787	0.0435435	2.48148	6.00011	0.1	0.017	95.6272	0.0459384	95.5813	4.52266	100.104
Trapper Creek	tc-90-19	33.889	0.174	6.045	1.412	0.011	0.04	0.456	0.061	1.805	4.804	0.145	0.043	50.732	99.617		72.4953	0.290249	11.422	2.01874	0.0142032	0.066316	0.638035	0.0681065	2.43296	5.7869	0.145	0.043	95.4209	0.0707482	95.3501	4.79401	100.144
Trapper Creek	tc-90-19	34.187	0.129	5.935	1.224	0.052	0.029	0.416	0.067	1.651	5.264	0.145	0.025	50.494	99.618		73.1328	0.215185	11.2142	1.74995	0.0671424	0.0480791	0.582067	0.0748055	2.22538	6.34101	0.145	0.025	95.8206	0.0666896	95.754	4.34078	100.095
Trapper Creek	tc-90-19	33.878	0.177	5.976	1.405	0.038	0.049	0.411	0.047	1.621	5.213	0.133	0.031	50.644	99.623		72.4718	0.295254	11.2917	2.00873	0.0490656	0.0812371	0.575071	0.0524755	2.18495	6.27958	0.133	0.031	95.4538	0.0629899	95.3908	4.75495	100.146
Trapper Creek	tc-90-19	33.97	0.129	6.12	1.382	0.024	0.054	0.472	0.079	1.894	4.678	0.154	0.026	50.65	99.632		72.6686	0.215185	11.5637	1.97585	0.0309888	0.0895266	0.660422	0.0882035	2.55292	5.63512	0.154	0.026	95.6606	0.0707046	95.5899	4.54116	100.131
Trapper Creek	tc-90-19	34.238	0.119	5.976	1.265	0.033	0.04	0.405	0.032	1.778	5.034	0.158	0.031	50.546	99.655		73.2419	0.198504	11.2917	1.80857	0.0426096	0.066316	0.566676	0.035728	2.39657	6.06396	0.158	0.031	95.9015	0.0735162	95.828	4.29912	100.127
Trapper Creek	tc-90-19	33.713	0.19	6.162	1.732	0.039	0.061	0.585	0.065	1.815	4.716	0.123	0.022	50.446	99.669		72.1188	0.316939	11.6431	2.47624	0.0503568	0.101132	0.818532	0.0725725	2.44644	5.68089	0.123	0.022	95.8701	0.05675	95.8133	4.33144	100.145
Trapper Creek	tc-90-19	33.515	0.266	6.262	1.742	0.011	0.085	0.598	0.089	1.994	4.65	0.157	0.022	50.3	99.691		71.6953	0.443715	11.832	2.49054	0.0142032	0.140922	0.836722	0.0993685	2.68771	5.60139	0.157	0.022	96.0209	0.0710658	95.9498	4.2026	100.152
Trapper Creek	tc-90-19	33.618	0.187	6.219	1.762	0	0.085	0.591	0.098	1.85	4.841	0.203	0.02	50.232	99.706		71.9156	0.311935	11.7508	2.51913	0	0.140922	0.826927	0.109417	2.49362	5.83147	0.203	0.02	96.1228	0.0899833	96.0329	4.12605	100.159
Trapper Creek	tc-90-19	34.263	0.167	6.069	1.32	0.006	0.04	0.386	0.043	1.696	5.108	0.149	0.046	50.431	99.724		73.2954	0.278573	11.4674	1.8872	0.0077472	0.066316	0.540091	0.0480095	2.28604	6.1531	0.149	0.046	96.2249	0.0731089	96.1518	4.01249	100.164
Trapper Creek	tc-90-19	33.621	0.242	6.189	1.659	0.026	0.068	0.607	0.111	1.848	4.844	0.145	0.022	50.354	99.736		71.922	0.40368	11.6941	2.37187	0.0335712	0.112737	0.849314	0.123932	2.49092	5.83508	0.145	0.022	96.0043	0.0660132	95.9383	4.26624	100.204
Trapper Creek	tc-90-19	34.337	0.17	5.975	1.319	0.032	0.037	0.387	0.031	1.816	4.967	0.078	0.022	50.576	99.747		73.4537	0.283577	11.2898	1.88577	0.0413184	0.0613423	0.54149	0.0346115	2.44779	5.98325	0.078	0.022	96.1226	0.0378026	96.0848	4.11368	100.198
Trapper Creek	tc-90-19	33.549	0.195	6.169	1.796	0.018	0.078	0.621	0.05	1.95	4.725	0.137	0.032	50.5	99.82		71.768	0.325279	11.6563	2.56774	0.0232416	0.129316	0.868903	0.055825	2.62841	5.69173	0.137	0.032	95.8838	0.0648995	95.8189	4.49504	100.314
Trapper Creek	tc-90-19	34.422	0.14	5.985	1.228	0.041	0.048	0.404	0.055	1.872	4.837	0.145	0.03	50.671	99.878		73.6355	0.233534	11.3087	1.75567	0.0529392	0.0795792	0.565277	0.0614075	2.52327	5.82665	0.145	0.03	96.2175	0.067817	96.1497	4.18804	100.338
Trapper Creek	tc-90-19	34.226	0.156	6.017	1.367	0.007	0.056	0.437	0.094	1.919	4.645	0.103	0.029	50.849	99.905		73.2163	0.260224	11.3691	1.9544	0.0090384	0.0928424	0.61145	0.104951	2.58662	5.59537	0.103	0.029	95.9323	0.0499073	95.8824	4.51919	100.402
Hazen ash
Richland	or99-01	33.105	0.251	5.91	1.52	0.045	0.058	0.539	0.089	1.893	4.644	0.215	0.038	51.65	99.957		70.8182	0.418693	11.1669	2.17314	0.058104	0.0961582	0.754169	0.0993685	2.55157	5.59416	0.215	0.038	93.9835	0.0990945	93.8844	6.82554	100.71
Richland	or99-01	33.326	0.192	5.912	1.541	0.018	0.07	0.568	0.071	1.829	4.773	0.206	0.026	51.201	99.733		71.291	0.320275	11.1707	2.20317	0.0232416	0.116053	0.794746	0.0792715	2.46531	5.74956	0.206	0.026	94.4453	0.0925993	94.3527	6.04668	100.399
Richland	or99-01	33.351	0.182	5.977	1.553	0.046	0.055	0.548	0.038	1.532	5.14	0.178	0.033	50.693	99.326		71.3445	0.303594	11.2935	2.22032	0.0593952	0.0911845	0.766762	0.042427	2.06498	6.19164	0.178	0.033	94.5893	0.0823882	94.5069	5.4153	99.9222
Richland	or99-01	33.118	0.169	5.922	1.561	0.037	0.061	0.531	0.109	1.833	4.714	0.207	0.038	51.241	99.541		70.846	0.281909	11.1896	2.23176	0.0477744	0.101132	0.742975	0.121699	2.4707	5.67848	0.207	0.038	93.9571	0.0957261	93.8614	6.38349	100.245
Richland	or99-01	32.97	0.173	5.968	1.567	0.054	0.067	0.528	0.084	1.957	4.77	0.216	0.028	50.713	99.095		70.5294	0.288581	11.2765	2.24034	0.0697248	0.111079	0.738778	0.093786	2.63784	5.74594	0.216	0.028	93.976	0.0972608	93.8788	5.86217	99.7409
Richland	or99-01	33.232	0.188	6.002	1.573	0.018	0.061	0.561	0.057	1.874	4.553	0.206	0.033	51.447	99.805		71.0899	0.313603	11.3408	2.24892	0.0232416	0.101132	0.784951	0.0636405	2.52596	5.48454	0.206	0.033	94.2157	0.0941777	94.1215	6.38784	100.509
Richland	or99-01	33.159	0.172	5.937	1.572	0.037	0.081	0.541	0.087	1.729	5.014	0.149	0.021	51.105	99.604		70.9337	0.286913	11.218	2.24749	0.0477744	0.13429	0.756967	0.0971355	2.33052	6.03986	0.149	0.021	94.2626	0.0674719	94.1952	6.07879	100.274
Richland	or99-01	33.468	0.163	6.004	1.575	0.006	0.071	0.548	0.078	1.948	4.765	0.134	0.024	51.683	100.467		71.5947	0.2719	11.3446	2.25178	0.0077472	0.117711	0.766762	0.087087	2.62571	5.73992	0.134	0.024	94.9659	0.0618326	94.9041	6.25211	101.156
Richland	or99-01	33.255	0.178	6.001	1.576	0.018	0.065	0.549	0.06	1.944	4.747	0.183	0.039	51.382	99.997		71.1391	0.296922	11.3389	2.25321	0.0232416	0.107763	0.768161	0.06699	2.62032	5.71824	0.183	0.039	94.5548	0.0858463	94.469	6.2129	100.682
Richland	or99-01	33.52	0.186	6.003	1.584	0.025	0.073	0.535	0.099	1.989	4.794	0.155	0.029	51.54	100.532		71.706	0.310267	11.3427	2.26464	0.03228	0.121027	0.748572	0.110534	2.68097	5.77485	0.155	0.029	95.2758	0.0718021	95.204	5.98781	101.192
Richland	or99-01	33.297	0.205	5.934	1.591	0.018	0.068	0.592	0.059	2.024	4.624	0.188	0.039	51.288	99.927		71.2289	0.34196	11.2123	2.27465	0.0232416	0.112737	0.828326	0.0658735	2.72815	5.57007	0.188	0.039	94.6132	0.0879516	94.5253	6.0708	100.596
Richland	or99-01	33.083	0.178	5.922	1.593	0.036	0.072	0.579	0.061	1.86	4.814	0.191	0.021	50.822	99.232		70.7712	0.296922	11.1896	2.27751	0.0464832	0.119369	0.810137	0.0681065	2.50709	5.79894	0.191	0.021	94.0973	0.0851561	94.0122	5.86619	99.8784
Richland	or99-01	33.365	0.157	6.033	1.607	0.028	0.068	0.625	0.051	1.453	5.309	0.165	0.024	50.368	99.253		71.3744	0.261892	11.3994	2.29753	0.0361536	0.112737	0.8745	0.0569415	1.9585	6.39522	0.165	0.024	94.9562	0.0748852	94.8813	4.91192	99.7933
Richland	or99-01	33.281	0.176	5.9	1.608	0.023	0.059	0.562	0.053	1.668	4.768	0.21	0.028	50.887	99.223		71.1947	0.293586	11.148	2.29896	0.0296976	0.0978161	0.78635	0.0591745	2.2483	5.74353	0.21	0.028	94.1382	0.0947345	94.0434	5.82088	99.8643
Richland	or99-01	33.431	0.217	5.984	1.611	0.027	0.078	0.547	0.045	2.171	4.467	0.207	0.035	51.564	100.384		71.5156	0.361978	11.3068	2.30325	0.0348624	0.129316	0.765362	0.0502425	2.92629	5.38095	0.207	0.035	95.0166	0.0950497	94.9216	6.13911	101.061
Richland	or99-01	33.27	0.191	6.009	1.615	0.061	0.069	0.549	0.068	1.782	4.842	0.182	0.039	51.504	100.181		71.1712	0.318607	11.354	2.30897	0.0787632	0.114395	0.768161	0.075922	2.40196	5.83267	0.182	0.039	94.6456	0.0854253	94.5602	6.31725	100.877
Richland	or99-01	32.936	0.197	5.937	1.632	0.043	0.072	0.605	0.083	2.029	4.656	0.153	0.038	51.059	99.44		70.4567	0.328616	11.218	2.33327	0.0555216	0.119369	0.846516	0.0926695	2.73489	5.60862	0.153	0.038	93.9851	0.0729893	93.9121	6.21278	100.125
Richland	or99-01	33.116	0.198	6.021	1.635	0.025	0.066	0.58	0.013	1.875	4.666	0.193	0.017	51.809	100.214		70.8417	0.330284	11.3767	2.33756	0.03228	0.109421	0.811536	0.0145145	2.52731	5.62066	0.193	0.017	94.212	0.0850963	94.1269	6.84189	100.969
Richland	or99-01	33.195	0.183	5.926	1.641	0.031	0.069	0.536	0.012	1.782	4.906	0.122	0.026	50.931	99.36		71.0107	0.305262	11.1972	2.34614	0.0400272	0.114395	0.749971	0.013398	2.40196	5.90977	0.122	0.026	94.2368	0.0572309	94.1796	5.82183	100.001
Richland	or99-01	33.175	0.198	5.986	1.668	0.038	0.069	0.573	0.059	1.969	4.506	0.204	0.027	51.199	99.671		70.968	0.330284	11.3105	2.38474	0.0490656	0.114395	0.801742	0.0658735	2.65402	5.42793	0.204	0.027	94.3375	0.0919827	94.2456	6.09751	100.343
Richland	or99-01	33.257	0.211	6.01	1.677	0.042	0.078	0.56	0.046	2.094	4.556	0.176	0.037	51.472	100.216		71.1434	0.351969	11.3559	2.39761	0.0542304	0.129316	0.783552	0.051359	2.8225	5.48816	0.176	0.037	94.791	0.082448	94.7085	6.1898	100.898
Richland	or99-01	33.219	0.159	5.955	1.689	0.029	0.081	0.562	0.077	1.779	4.75	0.165	0.039	51.291	99.795		71.0621	0.265228	11.252	2.41476	0.0374448	0.13429	0.78635	0.0859705	2.39791	5.72185	0.165	0.039	94.3619	0.0782674	94.2836	6.19419	100.478
Hazen	qe-6	33.694	0.203	6.021	1.517	0	0.053	0.534	0.087	1.369	5.201	0.048	0.019	51.55	100.296		72.0782	0.338624	11.3767	2.16885	0	0.0878687	0.747173	0.0971355	1.84528	6.26512	0.048	0.019	95.0719	0.0244946	95.0474	5.89839	100.946
Hazen	qe-6	33.563	0.211	5.994	1.534	0.033	0.06	0.562	0.108	1.516	5.019	0.06	0.039	50.851	99.55		71.798	0.351969	11.3257	2.19316	0.0426096	0.099474	0.78635	0.120582	2.04342	6.04589	0.06	0.039	94.9061	0.0340568	94.872	5.25652	100.129
Hazen	qe-6	33.425	0.169	5.969	1.549	0.024	0.067	0.55	0.089	1.577	4.731	0.075	0.022	51.578	99.825		71.5028	0.281909	11.2784	2.21461	0.0309888	0.111079	0.76956	0.0993685	2.12564	5.69896	0.075	0.022	94.2103	0.0365395	94.1738	6.35149	100.525
Hazen	qe-6	33.419	0.187	5.969	1.553	0.022	0.07	0.528	0.095	1.344	5.305	0.109	0.023	50.711	99.335		71.4899	0.311935	11.2784	2.22032	0.0284064	0.116053	0.738778	0.106068	1.81158	6.3904	0.109	0.023	94.6239	0.0510808	94.5728	5.35126	99.9241
Hazen	qe-6	33.721	0.178	6.049	1.555	0.033	0.068	0.56	0.132	1.399	5.004	0.123	0.018	51.001	99.841		72.136	0.296922	11.4296	2.22318	0.0426096	0.112737	0.783552	0.147378	1.88571	6.02782	0.123	0.018	95.2265	0.0558481	95.1706	5.24794	100.419
Hazen	qe-6	33.628	0.217	6.034	1.575	0.027	0.073	0.552	0.114	1.577	4.558	0.113	0.026	52.047	100.541		71.937	0.361978	11.4012	2.25178	0.0348624	0.121027	0.772358	0.127281	2.12564	5.49057	0.113	0.026	94.7627	0.0534414	94.7093	6.55446	101.264
Hazen	qe-6	33.558	0.196	5.99	1.58	0.02	0.07	0.535	0.154	1.594	4.568	0.001	0.025	51.827	100.118		71.7873	0.326948	11.3181	2.25893	0.025824	0.116053	0.748572	0.171941	2.14855	5.50261	0.001	0.025	94.4308	0.00605803	94.4247	6.39871	100.823
Hazen	qe-6	33.308	0.207	5.934	1.585	0	0.067	0.534	0.132	1.448	5.103	0.099	0.018	50.943	99.378		71.2525	0.345297	11.2123	2.26607	0	0.111079	0.747173	0.147378	1.95176	6.14707	0.099	0.018	94.2976	0.0457428	94.2519	5.76073	100.013
Hazen	qe-6	33.535	0.214	6.009	1.587	0.029	0.072	0.561	0.099	1.518	4.838	0.036	0.029	51.494	100.021		71.7381	0.356973	11.354	2.26893	0.0374448	0.119369	0.784951	0.110534	2.04611	5.82785	0.036	0.029	94.7093	0.0216968	94.6876	5.99393	100.681
Hazen	qe-6	33.631	0.193	6.059	1.597	0.016	0.063	0.573	0.098	1.577	4.679	0.132	0.012	51.766	100.396		71.9434	0.321943	11.4485	2.28323	0.0206592	0.104448	0.801742	0.109417	2.12564	5.63632	0.132	0.012	94.9393	0.0582847	94.881	6.19814	101.079
Hazen	qe-6	33.642	0.191	6.037	1.606	0.035	0.065	0.565	0.139	1.732	4.549	0.112	0.02	51.698	100.391		71.967	0.318607	11.4069	2.2961	0.045192	0.107763	0.790548	0.155194	2.33456	5.47973	0.112	0.02	95.0336	0.0516675	94.9819	6.07903	101.061
Hazen	qe-6	33.759	0.164	6.038	1.607	0.046	0.057	0.555	0.144	1.533	5.046	0.062	0.022	51.287	100.32		72.2173	0.273568	11.4088	2.29753	0.0593952	0.0945003	0.776556	0.160776	2.06633	6.07841	0.062	0.022	95.5171	0.0310658	95.4861	5.43193	100.918
Hazen	qe-6	33.593	0.194	6.007	1.61	0.026	0.061	0.547	0.084	1.446	4.902	0.047	0.02	51.371	99.908		71.8621	0.323611	11.3502	2.30182	0.0335712	0.101132	0.765362	0.093786	1.94906	5.90495	0.047	0.02	94.7527	0.0242991	94.7284	5.82088	100.549
Hazen	qe-6	33.48	0.176	6.066	1.616	0.059	0.061	0.562	0.106	1.457	4.621	0.155	0.029	51.694	100.082		71.6204	0.293586	11.4617	2.3104	0.0761808	0.101132	0.78635	0.118349	1.96389	5.56646	0.155	0.029	94.4825	0.0718021	94.4107	6.37408	100.785
Hazen	qe-6	33.57	0.178	6.072	1.628	0.022	0.061	0.528	0.128	1.684	4.601	0	0.03	51.478	99.98		71.8129	0.296922	11.473	2.32755	0.0284064	0.101132	0.738778	0.142912	2.26986	5.54236	0	0.03	94.7639	0.00676437	94.7572	5.8695	100.627
Hazen	qe-6	33.485	0.14	5.953	1.632	0.026	0.069	0.548	0.096	1.429	5.073	0.063	0.014	50.976	99.504		71.6311	0.233534	11.2482	2.33327	0.0335712	0.114395	0.766762	0.107184	1.92615	6.11094	0.063	0.014	94.5821	0.029683	94.5524	5.56432	100.117
Hazen	qe-6	33.439	0.196	6.015	1.641	0.017	0.063	0.565	0.09	1.487	4.814	0.107	0.03	51.611	100.075		71.5327	0.326948	11.3653	2.34614	0.0219504	0.104448	0.790548	0.100485	2.00433	5.79894	0.107	0.03	94.5288	0.051817	94.477	6.29155	100.769
Hazen	qe-6	33.557	0.203	5.99	1.659	0.044	0.062	0.549	0.162	1.615	4.522	0.067	0.033	51.768	100.231		71.7851	0.338624	11.3181	2.37187	0.0568128	0.10279	0.768161	0.180873	2.17686	5.4472	0.067	0.033	94.6464	0.0356513	94.6108	6.31655	100.927
Hazen	qe-6	33.28	0.183	6.042	1.678	0.007	0.068	0.601	0.12	1.679	4.36	0.113	0.017	51.541	99.689		71.1926	0.305262	11.4164	2.39904	0.0090384	0.112737	0.840919	0.13398	2.26312	5.25206	0.113	0.017	94.0551	0.0514121	94.0037	6.38985	100.394
Hazen	qe-6	33.464	0.21	6.026	1.688	0.034	0.071	0.58	0.121	1.502	4.9	0.056	0.019	51.056	99.727		71.5862	0.350301	11.3861	2.41333	0.0439008	0.117711	0.811536	0.135097	2.02455	5.90254	0.056	0.019	94.8463	0.0278631	94.8184	5.51595	100.334
Huntington Creek	htc93-454	34.047	0.168	6.007	1.583	0.045	0.07	0.563	0.122	1.934	4.724	0.185	0.014	50.789	100.251		72.8333	0.280241	11.3502	2.26322	0.058104	0.116053	0.78775	0.136213	2.60684	5.69053	0.185	0.014	96.3215	0.0810514	96.2405	4.50559	100.746
Huntington Creek	htc93-454	33.924	0.2	6.017	1.617	0.047	0.075	0.58	0.143	1.834	5.019	0.192	0.022	50.137	99.807		72.5702	0.33362	11.3691	2.31182	0.0606864	0.124342	0.811536	0.159659	2.47205	6.04589	0.192	0.022	96.4729	0.0858026	96.3871	3.84106	100.228
Huntington Creek	htc93-454	33.771	0.19	6.036	1.613	0.029	0.075	0.567	0.126	1.919	4.827	0.213	0.029	50.726	100.121		72.2429	0.316939	11.405	2.30611	0.0374448	0.124342	0.793346	0.140679	2.58662	5.8146	0.213	0.029	96.01	0.0962231	95.9138	4.72685	100.641
Huntington Creek	htc93-454	33.719	0.194	6.043	1.667	0.033	0.067	0.556	0.125	1.934	4.696	0.192	0.031	50.663	99.92		72.1317	0.323611	11.4182	2.38331	0.0426096	0.111079	0.777955	0.139563	2.60684	5.6568	0.192	0.031	95.8147	0.087832	95.7269	4.71105	100.438
Huntington Creek	htc93-454	33.965	0.2	6.043	1.598	0.019	0.074	0.563	0.127	1.735	4.898	0.146	0.033	50.546	99.947		72.6579	0.33362	11.4182	2.28466	0.0245328	0.122685	0.78775	0.141796	2.33861	5.90013	0.146	0.033	96.189	0.0689145	96.12	4.29905	100.419
Huntington Creek	htc93-454	33.821	0.209	6.047	1.604	0.02	0.066	0.554	0.104	1.861	4.886	0.171	0.025	50.449	99.817		72.3499	0.348633	11.4258	2.29324	0.025824	0.109421	0.775157	0.116116	2.50844	5.88568	0.171	0.025	96.0342	0.077637	95.9566	4.33675	100.293
Huntington Creek	htc93-454	33.788	0.226	6.056	1.581	0.004	0.077	0.541	0.13	1.904	4.817	0.145	0.029	51.33	100.628		72.2793	0.376991	11.4428	2.26036	0.0051648	0.127658	0.756967	0.145145	2.5664	5.80256	0.145	0.029	95.9373	0.0675915	95.8698	5.34679	101.217
Huntington Creek	htc93-454	34.006	0.19	6.057	1.631	0.025	0.066	0.551	0.119	1.853	4.812	0.259	0.023	51.242	100.834		72.7456	0.316939	11.4447	2.33184	0.03228	0.109421	0.770959	0.132863	2.49766	5.79654	0.259	0.023	96.4608	0.114239	96.3466	5.04205	101.389
Huntington Creek	htc93-454	34.032	0.18	6.059	1.632	0.01	0.074	0.56	0.136	1.889	4.988	0.175	0.02	50.085	99.84		72.8013	0.300258	11.4485	2.33327	0.012912	0.122685	0.783552	0.151844	2.54618	6.00854	0.175	0.02	96.704	0.0781938	96.6258	3.60969	100.235
Huntington Creek	htc93-454	33.765	0.167	6.064	1.619	0.057	0.068	0.599	0.119	1.92	4.807	0.213	0.029	50.534	99.961		72.2301	0.278573	11.4579	2.31468	0.0735984	0.112737	0.838121	0.132863	2.58797	5.79051	0.213	0.029	96.0591	0.0962231	95.9628	4.49168	100.455
Huntington Creek	htc93-454	34.054	0.199	6.065	1.591	0.024	0.065	0.53	0.116	1.703	4.978	0.196	0.024	50.424	99.969		72.8483	0.331952	11.4598	2.27465	0.0309888	0.107763	0.741576	0.129514	2.29547	5.9965	0.196	0.024	96.4366	0.0879378	96.3486	4.06664	100.415
Huntington Creek	htc93-454	34.24	0.17	6.068	1.632	0.031	0.055	0.553	0.152	1.78	4.732	0.189	0.022	50.463	100.087		73.2462	0.283577	11.4655	2.33327	0.0400272	0.0911845	0.773758	0.169708	2.39926	5.70017	0.189	0.022	96.7136	0.0845395	96.6291	3.88381	100.513
Huntington Creek	htc93-454	33.769	0.222	6.071	1.588	0.039	0.07	0.567	0.114	1.708	4.896	0.176	0.033	50.287	99.54		72.2386	0.370318	11.4712	2.27036	0.0503568	0.116053	0.793346	0.127281	2.30221	5.89772	0.176	0.033	95.8465	0.0815461	95.7649	4.24074	100.006
Huntington Creek	htc93-454	33.833	0.21	6.071	1.603	0.031	0.07	0.578	0.12	1.866	4.874	0.193	0.021	50.596	100.066		72.3756	0.350301	11.4712	2.29181	0.0400272	0.116053	0.808738	0.13398	2.51518	5.87122	0.193	0.021	96.188	0.0859982	96.102	4.45322	100.555
Huntington Creek	htc93-454	33.705	0.2	6.073	1.616	0.037	0.065	0.572	0.132	1.52	4.754	0.163	0.017	50.805	99.659		72.1017	0.33362	11.4749	2.3104	0.0477744	0.107763	0.800342	0.147378	2.04881	5.72667	0.163	0.017	95.2794	0.0724647	95.207	5.00232	100.209
Huntington Creek	htc93-454	33.843	0.23	6.075	1.643	0.028	0.07	0.58	0.152	1.811	4.772	0.243	0.029	51.008	100.484		72.3969	0.383663	11.4787	2.349	0.0361536	0.116053	0.811536	0.169708	2.44105	5.74835	0.243	0.029	96.2032	0.108855	96.0943	4.93214	101.026
Huntington Creek	htc93-454	33.656	0.177	6.094	1.621	0.019	0.067	0.56	0.104	1.776	4.781	0.17	0.022	50.397	99.444		71.9969	0.295254	11.5146	2.31754	0.0245328	0.111079	0.783552	0.116116	2.39387	5.75919	0.17	0.022	95.5047	0.0765395	95.4281	4.51164	99.9398
Huntington Creek	htc93-454	33.888	0.184	6.098	1.598	0.017	0.068	0.531	0.088	1.894	4.703	0.203	0.029	50.889	100.19		72.4932	0.30693	11.5222	2.28466	0.0219504	0.112737	0.742975	0.098252	2.55292	5.66523	0.203	0.029	96.033	0.0920126	95.941	4.77385	100.715
Baker Highway 1
Baker-Copperfield Hwy, OR	CPB-09-01	33.584	0.175	6.085	1.656	0.037	0.07	0.553	0.017	2.221	4.224	0.0440617	0.038	51.028	99.7321		71.8429	0.291917	11.4976	2.36758	0.0477744	0.116053	0.773758	0.0189805	2.99369	5.08823	0.0440617	0.038	95.1205	0.0271205	95.0934	5.21233	100.306
Baker-Copperfield Hwy, OR	CPB-09-01	33.583	0.193	6.073	1.658	0.015	0.076	0.597	0.095	2.164	4.292	1.352e-06	0.034	51.118	99.898		71.8408	0.321943	11.4749	2.37044	0.019368	0.126	0.835322	0.106068	2.91686	5.17014	1.352e-06	0.034	95.2158	0.00766686	95.2082	5.2699	100.478
Baker-Copperfield Hwy, OR	CPB-09-01	33.594	0.225	6.075	1.674	0.031	0.065	0.578	0.055	2.222	4.378	0.0235189	0.025	51.344	100.29		71.8643	0.375323	11.4787	2.39332	0.0400272	0.107763	0.808738	0.0614075	2.99503	5.27374	0.0235189	0.025	95.4469	0.0155397	95.4313	5.45931	100.891
Baker-Copperfield Hwy, OR	CPB-09-01	33.408	0.205	6.106	1.689	0.031	0.064	0.588	0.037	2.245	4.202	0.0910665	0.045	51.291	100.002		71.4664	0.34196	11.5373	2.41476	0.0400272	0.106106	0.82273	0.0413105	3.02604	5.06173	0.0910665	0.045	94.9944	0.0484904	94.9459	5.68205	100.628
Baker-Copperfield Hwy, OR	CPB-09-01	33.255	0.221	6.083	1.694	0.044	0.068	0.59	0.071	2.292	4.161	0.0789157	0.039	51.069	99.6659		71.1391	0.36865	11.4938	2.42191	0.0568128	0.112737	0.825528	0.0792715	3.08939	5.01234	0.0789157	0.039	94.7175	0.0420214	94.6755	5.60816	100.284
Baker-Copperfield Hwy, OR	CPB-09-01	33.379	0.204	5.988	1.699	0.01	0.085	0.593	0.062	2.157	4.21	0.082765	0.029	51.398	99.8968		71.4044	0.340292	11.3143	2.42906	0.012912	0.140922	0.829726	0.069223	2.90742	5.07137	0.082765	0.029	94.6314	0.0413873	94.59	5.96401	100.554
Baker-Copperfield Hwy, OR	CPB-09-01	33.427	0.182	6.075	1.699	0.04	0.047	0.616	0.042	2.128	4.188	0.029765	0.046	51.001	99.5208		71.507	0.303594	11.4787	2.42906	0.051648	0.0779213	0.861907	0.046893	2.86833	5.04486	0.029765	0.046	94.7457	0.0229047	94.7228	5.39156	100.114
Baker-Copperfield Hwy, OR	CPB-09-01	33.669	0.233	6.064	1.704	0.031	0.077	0.565	0.058	2.155	4.193	-0.0213858	0.036	51.221	99.9846		72.0247	0.388667	11.4579	2.43621	0.0400272	0.127658	0.790548	0.064757	2.90472	5.05089	-0.0213858	0.036	95.3007	-0.000887308	95.3016	5.26219	100.564
Baker-Copperfield Hwy, OR	CPB-09-01	33.515	0.176	6.048	1.707	0.024	0.083	0.612	0.067	2.053	4.155	0.0195237	0.054	51.058	99.5715		71.6953	0.293586	11.4277	2.4405	0.0309888	0.137606	0.85631	0.0748055	2.76724	5.00511	0.0195237	0.054	94.8027	0.0203964	94.7823	5.38178	100.164
Baker-Copperfield Hwy, OR	CPB-09-01	33.433	0.228	6.022	1.713	0.026	0.065	0.583	0.065	2.054	4.339	0.0523428	0.048	51.224	99.8523		71.5199	0.380327	11.3786	2.44908	0.0335712	0.107763	0.815734	0.0725725	2.76859	5.22676	0.0523428	0.048	94.8532	0.0328621	94.8203	5.6549	100.475
Baker-Copperfield Hwy, OR	CPB-09-01	33.491	0.204	6.12	1.714	0.058	0.068	0.582	0.049	2.109	4.179	0.0153126	0.047	51.106	99.7423		71.6439	0.340292	11.5637	2.45051	0.0748896	0.112737	0.814334	0.0547085	2.84272	5.03402	0.0153126	0.047	94.9942	0.0170449	94.9772	5.35465	100.332
Baker-Copperfield Hwy, OR	CPB-09-01	33.375	0.183	6.166	1.714	0.012	0.071	0.599	0.085	2.053	4.447	0.0203126	0.039	51.318	100.082		71.3958	0.305262	11.6507	2.45051	0.0154944	0.117711	0.838121	0.0949025	2.76724	5.35686	0.0203126	0.039	95.0519	0.0173464	95.0345	5.67261	100.707
Baker-Copperfield Hwy, OR	CPB-09-01	33.364	0.176	6.122	1.729	0.045	0.069	0.573	0.083	2.104	4.379	0.0258603	0.048	50.868	99.5859		71.3723	0.293586	11.5675	2.47195	0.058104	0.114395	0.801742	0.0926695	2.83598	5.27494	0.0258603	0.048	94.957	0.0217115	94.9353	5.22572	100.161
Baker-Copperfield Hwy, OR	CPB-09-01	33.592	0.214	6.152	1.739	0.045	0.066	0.597	0.045	2.239	4.247	0.0355587	0.033	51.282	100.287		71.86	0.356973	11.6242	2.48625	0.058104	0.109421	0.835322	0.0502425	3.01795	5.11594	0.0355587	0.033	95.583	0.0224129	95.5606	5.3106	100.871
Baker-Copperfield Hwy, OR	CPB-09-01	33.273	0.182	6.082	1.747	0.019	0.051	0.606	0.031	2.067	4.345	0.108317	0.049	51.433	99.9933		71.1776	0.303594	11.4919	2.49769	0.0245328	0.0845529	0.847915	0.0346115	2.78611	5.23399	0.108317	0.049	94.6398	0.0566558	94.5832	6.08028	100.663
Baker-Copperfield Hwy, OR	CPB-09-01	33.475	0.204	6.102	1.767	0.031	0.083	0.588	0.055	2.164	4.23	0.0377143	0.06	51.217	100.014		71.6097	0.340292	11.5297	2.52628	0.0400272	0.137606	0.82273	0.0614075	2.91686	5.09546	0.0377143	0.06	95.1778	0.0294085	95.1484	5.46732	100.616
Baker-Copperfield Hwy, OR	CPB-09-01	33.387	0.186	6.029	1.783	0	0.051	0.585	0.081	2.064	4.264	0.0572319	0.034	51.066	99.5872		71.4215	0.310267	11.3918	2.54916	0	0.0845529	0.818532	0.0904365	2.78207	5.13641	0.0572319	0.034	94.6759	0.0317639	94.6442	5.55482	100.199
Baker-Copperfield Hwy, OR	CPB-09-01	33.518	0.154	6.033	1.803	0.034	0.079	0.578	0.077	2.186	4.232	0.0456287	0.051	51.354	100.145		71.7017	0.256887	11.3994	2.57775	0.0439008	0.130974	0.808738	0.0859705	2.94651	5.09787	0.0456287	0.051	95.1463	0.0307115	95.1156	5.65153	100.767
Baker-Copperfield Hwy, OR	CPB-09-01	33.229	0.199	6.116	1.811	0.025	0.06	0.568	0.055	2.103	4.247	0.0763875	0.039	51.402	99.9304		71.0835	0.331952	11.5562	2.58919	0.03228	0.099474	0.794746	0.0614075	2.83463	5.11594	0.0763875	0.039	94.6147	0.0409568	94.5737	6.02016	100.594
Teewinott Fm, WY	tw93-355	34.12	0.11	6.03	1.69	0	0.056	0.57	0.1	1.84	4.25	0.2	0.037	51.83	100.833		72.9895	0.183491	11.3937	2.41619	0	0.0928424	0.797544	0.11165	2.48014	5.11955	0.2	0.037	95.8216	0.0925533	95.729	5.7357	101.465
Teewinott Fm, WY	tw93-355	34.12	0.14	5.99	1.72	0.03	0.06	0.55	0.12	1.89	4.27	0.21	0.025	50.58	99.705		72.9895	0.233534	11.3181	2.45908	0.038736	0.099474	0.76956	0.13398	2.54753	5.14364	0.21	0.025	95.9682	0.094058	95.8741	4.30351	100.178
Teewinott Fm, WY	tw93-355	34.12	0.14	5.94	1.76	0.03	0.046	0.57	0.05	1.94	4.21	0.18	0.033	50.58	99.599		72.9895	0.233534	11.2236	2.51627	0.038736	0.0762634	0.797544	0.055825	2.61493	5.07137	0.18	0.033	95.8306	0.0832303	95.7474	4.32686	100.074
Teewinott Fm, WY	tw93-355	34.05	0.17	5.93	1.78	0.03	0.066	0.56	0.09	1.87	4.27	0.14	0.053	50.59	99.599		72.8398	0.283577	11.2047	2.54487	0.038736	0.109421	0.783552	0.100485	2.52057	5.14364	0.14	0.053	95.7623	0.0708978	95.6914	4.38976	100.081
Teewinott Fm, WY	tw93-355	33.81	0.14	5.92	1.74	0.02	0.061	0.58	0.08	1.8	4.34	0.14	0.027	50.91	99.568		72.3264	0.233534	11.1858	2.48768	0.025824	0.101132	0.811536	0.08932	2.42622	5.22796	0.14	0.027	95.0824	0.0650353	95.0174	5.11327	100.131
Teewinott Fm, WY	tw93-355	33.76	0.14	5.86	1.7	0.02	0.06	0.6	0.11	1.78	4.3	0.14	0.039	50.31	98.819		72.2194	0.233534	11.0725	2.43049	0.025824	0.099474	0.83952	0.122815	2.39926	5.17978	0.14	0.039	94.8016	0.0677411	94.7338	4.58964	99.3235
Teewinott Fm, WY	tw93-355	33.73	0.17	5.85	1.59	0.05	0.046	0.54	0.11	1.73	4.48	0.12	0.039	50.24	98.695		72.1552	0.283577	11.0536	2.27322	0.06456	0.0762634	0.755568	0.122815	2.33187	5.39661	0.12	0.039	94.6723	0.05932	94.613	4.58612	99.1991
Baker Highway 3
Baker-Copperfield Hwy, OR	CPB-09-03	33.818	0.188	6.07	1.696	0.038	0.051	0.557	0.075	4.252	2.142	0.031	0.0248554	50.966	99.9089		72.3435	0.313603	11.4693	2.42477	0.0490656	0.0845529	0.779354	0.0837375	5.73127	2.58025	0.031	0.0248554	95.9152	0.018657	95.8965	4.50782	100.404
Baker-Copperfield Hwy, OR	CPB-09-03	33.574	0.167	6.059	1.711	0.048	0.067	0.561	0.044	4.287	2.199	0.034	0.0184031	51.665	100.434		71.8215	0.278573	11.4485	2.44622	0.0619776	0.111079	0.784951	0.049126	5.77845	2.64892	0.034	0.0184031	95.4817	0.0184653	95.4632	5.58661	101.05
Baker-Copperfield Hwy, OR	CPB-09-03	33.519	0.202	6.018	1.721	0.035	0.06	0.565	0.042	4.35	2.236	0.044	0.0391015	51.049	99.8801		71.7038	0.336956	11.371	2.46051	0.045192	0.099474	0.790548	0.046893	5.86336	2.69349	0.044	0.0391015	95.4944	0.0273429	95.467	4.95871	100.426
Baker-Copperfield Hwy, OR	CPB-09-03	33.674	0.153	6.039	1.724	0.045	0.051	0.575	0.076	4.222	2.129	0.037	0.0200111	50.919	99.664		72.0354	0.255219	11.4107	2.4648	0.058104	0.0845529	0.80454	0.084854	5.69083	2.56459	0.037	0.0200111	95.5106	0.020091	95.4905	4.68915	100.18
Baker-Copperfield Hwy, OR	CPB-09-03	33.755	0.161	6.055	1.73	0.045	0.062	0.543	0.072	4.112	2.315	0.039	0.0118301	51.238	100.139		72.2087	0.268564	11.4409	2.47338	0.058104	0.10279	0.759766	0.080388	5.54256	2.78865	0.039	0.0118301	95.7747	0.0190885	95.7556	4.92513	100.681
Baker-Copperfield Hwy, OR	CPB-09-03	33.766	0.186	6.084	1.73	0.026	0.074	0.576	0.068	4.155	2.249	0.04	0.0858301	51.104	100.144		72.2322	0.310267	11.4957	2.47338	0.0335712	0.122685	0.805939	0.075922	5.60052	2.70915	0.04	0.0858301	95.9852	0.036195	95.949	4.71313	100.662
Baker-Copperfield Hwy, OR	CPB-09-03	33.668	0.169	6.053	1.745	0.065	0.047	0.567	0.038	4.319	2.191	0.037	0.0493778	51.016	99.9644		72.0226	0.281909	11.4371	2.49483	0.083928	0.0779213	0.793346	0.042427	5.82158	2.63928	0.037	0.0493778	95.7813	0.0267126	95.7546	4.72999	100.485
Baker-Copperfield Hwy, OR	CPB-09-03	33.347	0.134	6.044	1.745	0.017	0.068	0.558	0.054	4.293	2.194	0.031	0.0513778	51.311	99.8474		71.3359	0.223525	11.4201	2.49483	0.0219504	0.112737	0.780754	0.060291	5.78653	2.64289	0.031	0.0513778	94.9619	0.0246372	94.9373	5.51788	100.455
Baker-Copperfield Hwy, OR	CPB-09-03	33.628	0.23	6.06	1.747	0.05	0.057	0.592	0.039	4.328	2.05	0.039	0.0273175	51.568	100.415		71.937	0.383663	11.4504	2.49769	0.06456	0.0945003	0.828326	0.0435435	5.83371	2.46943	0.039	0.0273175	95.6691	0.0225806	95.6465	5.35888	101.005
Baker-Copperfield Hwy, OR	CPB-09-03	33.671	0.172	6.111	1.75	0.037	0.053	0.587	0.088	4.238	2.151	0.051	0.038227	51.161	100.108		72.029	0.286913	11.5467	2.50197	0.0477744	0.0878687	0.82133	0.098252	5.7124	2.59109	0.051	0.038227	95.8126	0.0300931	95.7825	4.86044	100.643
Baker-Copperfield Hwy, OR	CPB-09-03	33.639	0.157	6.017	1.766	0.041	0.053	0.581	0.053	4.383	2.118	0.042	0.0377445	51.497	100.385		71.9605	0.261892	11.3691	2.52485	0.0529392	0.0878687	0.812935	0.0591745	5.90785	2.55134	0.042	0.0377445	95.6683	0.0261948	95.6421	5.32951	100.972
Baker-Copperfield Hwy, OR	CPB-09-03	33.686	0.18	6.015	1.773	0.032	0.062	0.566	0.075	4.172	2.246	0.039	0.0265334	51.387	100.26		72.0611	0.300258	11.3653	2.53486	0.0413184	0.10279	0.791947	0.0837375	5.62344	2.70553	0.039	0.0265334	95.6758	0.0224038	95.6534	5.17583	100.829
Baker-Copperfield Hwy, OR	CPB-09-03	33.253	0.17	6.03	1.781	0.023	0.054	0.569	0.064	4.589	1.911	0.051	0.0232922	51.624	100.142		71.1348	0.283577	11.3937	2.5463	0.0296976	0.0895266	0.796145	0.071456	6.18551	2.30199	0.051	0.0232922	94.907	0.0267256	94.8803	5.91385	100.794
Baker-Copperfield Hwy, OR	CPB-09-03	33.692	0.148	6.122	1.822	0.053	0.059	0.581	0.051	4.203	2.197	0.045	0.0440558	51.142	100.159		72.0739	0.246879	11.5675	2.60491	0.0684336	0.0978161	0.812935	0.0569415	5.66522	2.64651	0.045	0.0440558	95.9301	0.028881	95.9013	4.78398	100.685
Baker-Copperfield Hwy, OR	CPB-09-03	33.362	0.177	6.133	1.913	0.06	0.063	0.646	0.067	4.177	2.236	0.036	0.0283116	51.064	99.9623		71.368	0.295254	11.5883	2.73502	0.077472	0.104448	0.903883	0.0748055	5.63018	2.69349	0.036	0.0283116	95.5351	0.0215416	95.5136	4.9988	100.512
Baker-Copperfield Hwy, OR	CPB-09-03	33.053	0.211	6.154	2.064	0.041	0.082	0.755	0.025	4.145	2.361	0.03	0.023758	51.18	100.125		70.707	0.351969	11.628	2.9509	0.0529392	0.135948	1.0564	0.0279125	5.58705	2.84406	0.03	0.023758	95.3959	0.0179885	95.3779	5.33426	100.712
Baker-Copperfield Hwy, OR	CPB-09-03	33.331	0.174	6.174	2.064	0.048	0.074	0.684	0.103	4.131	2.507	0.029	0.048758	50.733	100.101		71.3017	0.290249	11.6658	2.9509	0.0619776	0.122685	0.957053	0.115	5.56817	3.01993	0.029	0.048758	96.1312	0.0232044	96.108	4.48585	100.594
Baker-Copperfield Hwy, OR	CPB-09-03	32.976	0.268	6.259	2.182	0.052	0.118	0.784	0.113	4.076	2.249	0.025	0.0591996	50.558	99.7192		70.5423	0.447051	11.8264	3.11961	0.0671424	0.195632	1.09697	0.126165	5.49404	2.70915	0.025	0.0591996	95.7086	0.0238746	95.6847	4.53281	100.218
Baker-Copperfield Hwy, OR	CPB-09-03	32.87	0.234	6.186	2.21	0.087	0.095	0.81	0.029	4.053	2.323	0.043	0.0593552	51.285	100.284		70.3155	0.390335	11.6884	3.15964	0.112334	0.1575	1.13335	0.0323785	5.46304	2.79829	0.043	0.0593552	95.3532	0.0314886	95.3217	5.57707	100.899
Baker-Copperfield Hwy, OR	CPB-09-03	32.692	0.197	6.214	2.276	0.064	0.098	0.8	0.055	4.014	2.249	0.025	0.0513649	50.992	99.7274		69.9347	0.328616	11.7414	3.254	0.0826368	0.162474	1.11936	0.0614075	5.41047	2.70915	0.025	0.0513649	94.8806	0.022108	94.8584	5.47162	100.33
Baker-Copperfield Hwy, OR	CPB-09-03	32.733	0.215	6.108	2.285	0.045	0.111	0.774	0.101	4.046	2.259	0.022	0.0240935	50.851	99.5741		70.0224	0.358642	11.5411	3.26686	0.058104	0.184027	1.08298	0.112767	5.4536	2.72119	0.022	0.0240935	94.8478	0.0146957	94.8331	5.32771	100.161
Rattlesnake Hills, WA	ell99-06	33.259	0.154	5.831	1.662	0.036	0.055	0.576	0.091	1.907	4.308	0.2	0.026	51.942	100.047		71.1477	0.256887	11.0177	2.37616	0.0464832	0.0911845	0.805939	0.101601	2.57045	5.18942	0.2	0.026	93.8294	0.090073	93.7394	7.08998	100.829
Rattlesnake Hills, WA	ell99-06	33.507	0.174	5.939	1.668	0.037	0.056	0.564	0.095	2.232	4.246	0.205	0.044	51.778	100.545		71.6782	0.290249	11.2217	2.38474	0.0477744	0.0928424	0.789149	0.106068	3.00851	5.11473	0.205	0.044	94.983	0.0962369	94.8867	6.3594	101.246
Rattlesnake Hills, WA	ell99-06	33.588	0.173	5.9	1.669	0.014	0.055	0.596	0.1	2.022	4.452	0.208	0.021	51.82	100.618		71.8514	0.288581	11.148	2.38617	0.0180768	0.0911845	0.833923	0.11165	2.72545	5.36288	0.208	0.021	95.0464	0.092314	94.9541	6.36572	101.32
Rattlesnake Hills, WA	ell99-06	33.307	0.151	5.876	1.734	0.039	0.055	0.588	0.081	1.992	4.354	0.147	0.045	51.705	100.074		71.2503	0.251883	11.1027	2.4791	0.0503568	0.0911845	0.82273	0.0904365	2.68502	5.24483	0.147	0.045	94.2606	0.0720413	94.1885	6.61504	100.804
Rattlesnake Hills, WA	ell99-06	33.529	0.195	5.862	1.744	0.038	0.051	0.597	0.088	1.8	4.752	0.114	0.031	50.882	99.683		71.7252	0.325279	11.0762	2.4934	0.0490656	0.0845529	0.835322	0.098252	2.42622	5.72426	0.114	0.031	94.9828	0.0549899	94.9278	5.34337	100.271
Rattlesnake Hills, WA	ell99-06	33.286	0.117	5.905	1.758	0.037	0.048	0.581	0.084	2.06	4.543	0.18	0.041	51.44	100.08		71.2054	0.195168	11.1575	2.51341	0.0477744	0.0795792	0.812935	0.093786	2.77667	5.4725	0.18	0.041	94.5757	0.0850341	94.4907	6.28183	100.773
Rattlesnake Hills, WA	ell99-06	33.552	0.138	5.906	1.777	0.053	0.052	0.574	0.071	2.049	4.317	0.168	0.03	52.088	100.775		71.7744	0.230198	11.1594	2.54058	0.0684336	0.0862108	0.803141	0.0792715	2.76185	5.20026	0.168	0.03	94.9018	0.0775012	94.8243	6.68843	101.513
Rattlesnake Hills, WA	ell99-06	33.489	0.128	5.871	1.778	0.053	0.044	0.599	0.079	2.129	4.63	0.183	0.039	50.868	99.89		71.6397	0.213517	11.0933	2.54201	0.0684336	0.0729476	0.838121	0.0882035	2.86968	5.5773	0.183	0.039	95.2251	0.0858463	95.1393	5.3384	100.478
Rattlesnake Hills, WA	ell99-06	33.529	0.18	5.923	1.785	0.041	0.053	0.56	0.026	2.217	4.301	0.144	0.032	52.198	100.989		71.7252	0.300258	11.1915	2.55201	0.0529392	0.0878687	0.783552	0.029029	2.98829	5.18098	0.144	0.032	95.0677	0.0678469	94.9998	6.73167	101.732
Rattlesnake Hills, WA	ell99-06	33.225	0.207	5.938	1.888	0.038	0.051	0.605	0.055	2.167	4.268	0.156	0.042	51.789	100.429		71.0749	0.345297	11.2199	2.69927	0.0490656	0.0845529	0.846516	0.0614075	2.9209	5.14123	0.156	0.042	94.641	0.0751543	94.5659	6.58993	101.156
Rattlesnake Hills, WA	ell99-06	33.185	0.174	6.018	1.888	0.042	0.073	0.739	0.042	1.972	4.587	0.177	0.039	51.262	100.198		70.9894	0.290249	11.371	2.69927	0.0542304	0.121027	1.03401	0.046893	2.65806	5.5255	0.177	0.039	95.0056	0.08332	94.9223	5.92906	100.851
Rattlesnake Hills, WA	ell99-06	33.273	0.179	5.972	1.946	0.031	0.07	0.627	0.042	2.151	4.326	0.234	0.029	51.429	100.309		71.1776	0.29859	11.2841	2.7822	0.0400272	0.116053	0.877298	0.046893	2.89933	5.2111	0.234	0.029	94.9962	0.105065	94.8911	6.089	100.98
Rattlesnake Hills, WA	ell99-06	33.084	0.179	6.065	2.04	0.042	0.067	0.72	0.077	2.309	4.141	0.218	0.033	51.946	100.921		70.7733	0.29859	11.4598	2.91659	0.0542304	0.111079	1.00742	0.0859705	3.1123	4.98825	0.218	0.033	95.0585	0.0992303	94.9593	6.7008	101.66
Rattlesnake Hills, WA	ell99-06	32.849	0.22	5.964	2.089	0.057	0.074	0.738	0.062	2.171	4.197	0.085	0.035	50.682	99.223		70.2706	0.366982	11.269	2.98664	0.0735984	0.122685	1.03261	0.069223	2.92629	5.05571	0.085	0.035	94.2933	0.0436812	94.2496	5.589	99.8386
Rattlesnake Hills, WA	ell99-06	32.794	0.223	6.031	2.166	0.06	0.095	0.812	0.059	2.206	4.17	0.17	0.035	51.199	100.02		70.1529	0.371986	11.3956	3.09673	0.077472	0.1575	1.13615	0.0658735	2.97347	5.02318	0.17	0.035	94.6559	0.0794707	94.5764	6.118	100.694
Rattlesnake Hills, WA	ell99-06	32.751	0.212	5.996	2.187	0.08	0.088	0.828	0.009	2.312	4.182	0.202	0.025	51.109	99.981		70.0609	0.353637	11.3294	3.12675	0.103296	0.145895	1.15854	0.0100485	3.11634	5.03764	0.202	0.025	94.6695	0.0906896	94.5788	6.07139	100.65
Rattlesnake Hills, WA	ell99-06	32.809	0.171	6.047	2.188	0.065	0.101	0.816	0.058	2.324	4.098	0.262	0.025	51.157	100.121		70.185	0.285245	11.4258	3.12818	0.083928	0.167448	1.14175	0.064757	3.13252	4.93645	0.262	0.025	94.8381	0.115953	94.7221	6.06765	100.79
Rattlesnake Hills, WA	ell99-06	32.638	0.23	6.01	2.212	0.059	0.096	0.817	0.12	2.196	4.154	0.169	0.027	51.853	100.581		69.8192	0.383663	11.3559	3.1625	0.0761808	0.159158	1.14315	0.13398	2.95999	5.00391	0.169	0.027	94.3936	0.0772458	94.3164	7.04164	101.358
Rattlesnake Hills, WA	ell99-06	32.643	0.214	5.99	2.215	0.06	0.091	0.818	0.027	2.182	4.167	0.188	0.026	50.804	99.425		69.8299	0.356973	11.3181	3.16679	0.077472	0.150869	1.14455	0.0301455	2.94112	5.01957	0.188	0.026	94.2495	0.0850204	94.1645	5.91207	100.077
Rattlesnake Hills, WA	ell99-06	32.841	0.18	6.062	2.285	0.032	0.085	0.83	0.058	2.197	4.196	0.191	0.027	51.569	100.553		70.2535	0.300258	11.4541	3.26686	0.0413184	0.140922	1.16134	0.064757	2.96134	5.0545	0.191	0.027	94.9169	0.086509	94.8304	6.43184	101.262
Rattlesnake Hills, WA	ell99-06	32.703	0.24	6.004	2.332	0.057	0.102	0.815	0.079	1.967	4.172	0.139	0.043	52.285	100.938		69.9583	0.400344	11.3446	3.33406	0.0735984	0.169106	1.14035	0.0882035	2.65132	5.02559	0.139	0.043	94.3674	0.0682219	94.2992	7.46262	101.762
Rattlesnake Hills, WA	ell99-06	32.862	0.283	6.07	2.34	0.039	0.104	0.82	0.099	2.261	4.076	0.205	0.03	51.087	100.276		70.2984	0.472072	11.4693	3.3455	0.0503568	0.172422	1.14734	0.110534	3.0476	4.90995	0.205	0.03	95.2584	0.0930802	95.1654	5.74338	100.909
Thousand Springs Fm, NV	tsp96-01	34.41	0.11	6.02	1.45	0.02	0.05	0.44	0.12	1.98	4.66	0.14	0.031	50.14	99.571		73.6099	0.183491	11.3748	2.07306	0.025824	0.082895	0.615648	0.13398	2.66884	5.61344	0.14	0.031	96.5528	0.0659372	96.4869	3.46329	99.9502
Thousand Springs Fm, NV	tsp96-01	34.21	0.18	6.07	1.69	0.03	0.05	0.57	0.13	1.99	4.47	0.19	0.039	50.77	100.389		73.182	0.300258	11.4693	2.41619	0.038736	0.082895	0.797544	0.145145	2.68232	5.38456	0.19	0.039	96.728	0.0887937	96.6392	4.21228	100.851
Thousand Springs Fm, NV	tsp96-01	34.26	0.16	6.08	1.72	0.06	0.06	0.58	0.14	2.13	4.38	0.19	0.027	50.62	100.407		73.289	0.266896	11.4882	2.45908	0.077472	0.099474	0.811536	0.15631	2.87103	5.27615	0.19	0.027	97.0121	0.0860879	96.926	3.90981	100.836
Thousand Springs Fm, NV	tsp96-01	34.23	0.15	6.08	1.72	0.03	0.06	0.55	0.14	1.97	4.41	0.22	0.044	50.96	100.564		73.2248	0.250215	11.4882	2.45908	0.038736	0.099474	0.76956	0.15631	2.65536	5.31229	0.22	0.044	96.718	0.102553	96.6155	4.43582	101.051
Thousand Springs Fm, NV	tsp96-01	34.2	0.18	6.05	1.74	0.04	0.07	0.57	0.15	1.91	4.53	0.21	0.044	50.76	100.454		73.1606	0.300258	11.4315	2.48768	0.051648	0.116053	0.797544	0.167475	2.57449	5.45684	0.21	0.044	96.7981	0.0983421	96.6998	4.21722	100.917
Thousand Springs Fm, NV	tsp96-01	34.33	0.17	6.17	1.76	0.03	0.07	0.56	0.11	2.21	4.32	0.23	0.043	50.82	100.823		73.4387	0.283577	11.6582	2.51627	0.038736	0.116053	0.783552	0.122815	2.97886	5.20387	0.23	0.043	97.4137	0.106538	97.3071	3.94902	101.256
Thousand Springs Fm, NV	tsp96-01	34.16	0.14	6.1	1.76	0.02	0.07	0.56	0.09	2.12	4.16	0.27	0.052	51	100.502		73.0751	0.233534	11.5259	2.51627	0.025824	0.116053	0.783552	0.100485	2.85755	5.01114	0.27	0.052	96.5674	0.125409	96.442	4.56122	101.003
Thousand Springs Fm, NV	tsp96-01	34.14	0.18	6.09	1.78	0.07	0.08	0.55	0.13	1.97	4.4	0.16	0.032	50.33	99.912		73.0323	0.300258	11.5071	2.54487	0.090384	0.132632	0.76956	0.145145	2.65536	5.30024	0.16	0.032	96.6698	0.0745838	96.5952	3.72511	100.32
Thousand Springs Fm, NV	tsp96-01	34.15	0.16	6.04	1.78	0.03	0.06	0.55	0.16	2.19	4.27	0.19	0.042	51.25	100.872		73.0537	0.266896	11.4126	2.54487	0.038736	0.099474	0.76956	0.17864	2.9519	5.14364	0.19	0.042	96.692	0.0894701	96.6025	4.7969	101.399
Thousand Springs Fm, NV	tsp96-01	34.08	0.18	6.05	1.79	0.03	0.05	0.54	0.13	1.93	4.57	0.22	0.037	50.89	100.497		72.9039	0.300258	11.4315	2.55916	0.038736	0.082895	0.755568	0.145145	2.60145	5.50502	0.22	0.037	96.5806	0.100974	96.4797	4.51321	100.993
Thousand Springs Fm, NV	tsp96-01	33.83	0.25	6.18	2.17	0.04	0.1	0.77	0.1	2.27	3.94	0.22	0.041	51.74	101.651		72.3691	0.417025	11.6771	3.10245	0.051648	0.16579	1.07738	0.11165	3.05973	4.74612	0.22	0.041	97.039	0.101876	96.9372	5.29682	102.234
Thousand Springs Fm, NV	tsp96-01	33.43	0.22	6.19	2.18	0.1	0.09	0.77	0.14	2.06	4.16	0.27	0.026	50.56	100.196		71.5135	0.366982	11.696	3.11675	0.12912	0.149211	1.07738	0.15631	2.77667	5.01114	0.27	0.026	96.289	0.119547	96.1695	4.52364	100.693
Thousand Springs Fm, NV	tsp96-01	33.7	0.21	6.17	2.18	0.03	0.1	0.75	0.17	2.2	4	0.25	0.052	50.86	100.672		72.091	0.350301	11.6582	3.11675	0.038736	0.16579	1.0494	0.189805	2.96538	4.8184	0.25	0.052	96.7458	0.116988	96.6288	4.54233	101.171
Thousand Springs Fm, NV	tsp96-01	33.71	0.18	6.21	2.23	0.03	0.11	0.8	0.21	2.26	3.98	0.27	0.033	50.98	101.003		72.1124	0.300258	11.7338	3.18823	0.038736	0.182369	1.11936	0.234465	3.04625	4.79431	0.27	0.033	97.0532	0.121125	96.9321	4.57352	101.506
Thousand Springs Fm, NV	tsp96-01	33.57	0.22	6.2	2.24	0.05	0.1	0.76	0.19	2.28	4.12	0.23	0.013	50.84	100.813		71.8129	0.366982	11.7149	3.20253	0.06456	0.16579	1.06339	0.212135	3.07321	4.96295	0.23	0.013	96.8824	0.0997733	96.7826	4.52794	101.311
Thousand Springs Fm, NV	tsp96-01	33.38	0.22	6.29	2.25	0.07	0.11	0.77	0.13	2.31	3.94	0.31	0.048	51.26	101.088		71.4065	0.366982	11.885	3.21683	0.090384	0.182369	1.07738	0.145145	3.11365	4.74612	0.31	0.048	96.5883	0.141349	96.447	5.21498	101.662
Thousand Springs Fm, NV	tsp96-01	33.47	0.23	6.22	2.25	0.04	0.1	0.84	0.05	1.95	4.23	0.19	0.036	50.83	100.436		71.599	0.383663	11.7527	3.21683	0.051648	0.16579	1.17533	0.055825	2.62841	5.09546	0.19	0.036	96.3507	0.0881172	96.2625	4.68895	100.951
Thousand Springs Fm, NV	tsp96-01	33.63	0.17	6.2	2.25	0.04	0.09	0.77	0.13	2.09	4.23	0.27	0.01	50.3	100.18		71.9413	0.283577	11.7149	3.21683	0.051648	0.149211	1.07738	0.145145	2.81711	5.09546	0.27	0.01	96.7726	0.115939	96.6566	3.95757	100.614
Thousand Springs Fm, NV	tsp96-01	33.59	0.23	6.19	2.25	0.05	0.09	0.76	0.13	2.25	4.04	0.23	0.037	50.78	100.627		71.8557	0.383663	11.696	3.21683	0.06456	0.149211	1.06339	0.145145	3.03277	4.86658	0.23	0.037	96.7409	0.105185	96.6357	4.48399	101.12
Thousand Springs Fm, NV	tsp96-01	33.68	0.24	6.22	2.26	0.08	0.1	0.74	0.11	2.19	4.09	0.2	0.05	51.22	101.18		72.0483	0.400344	11.7527	3.23112	0.103296	0.16579	1.03541	0.122815	2.9519	4.92681	0.2	0.05	96.9884	0.0954845	96.893	4.8167	101.71
Thousand Springs Fm, NV	tsp96-01	33.64	0.23	6.21	2.26	0.05	0.09	0.78	0.15	2.12	3.95	0.29	0.042	51.55	101.362		71.9627	0.383663	11.7338	3.23112	0.06456	0.149211	1.09138	0.167475	2.85755	4.75817	0.29	0.042	96.7316	0.131575	96.6	5.35098	101.951
Thousand Springs Fm, NV	tsp96-01	33.4	0.22	6.15	2.28	0.06	0.1	0.79	0.14	2.2	4.04	0.29	0.04	50.63	100.34		71.4493	0.366982	11.6204	3.25972	0.077472	0.16579	1.10537	0.15631	2.96538	4.86658	0.29	0.04	96.3633	0.131124	96.2322	4.6151	100.847
Kilgore ash
Allways Welcome Inn, OR	CPB-09-04	33.972	0.093	6.156	1.039	0.025	0.037	0.338	0.031	2.266	4.448	0.102	0.119668	51.035	99.6617		72.6729	0.155133	11.6318	1.48546	0.03228	0.0613423	0.47293	0.0346115	3.05434	5.35806	0.102	0.119668	95.1805	0.06993	95.1106	5.11382	100.224
Allways Welcome Inn, OR	CPB-09-04	33.944	0.087	6.198	1.043	0.032	0.032	0.341	0.062	2.426	4.169	0.087	0.0785473	51.288	99.7875		72.613	0.145125	11.7111	1.49118	0.0413184	0.0530528	0.477127	0.069223	3.27001	5.02198	0.087	0.0785473	95.0587	0.0543424	95.0043	5.37494	100.379
Allways Welcome Inn, OR	CPB-09-04	33.999	0.09	6.144	1.065	0.06	0.031	0.341	0.033	2.497	4.122	0.119	0.135884	50.897	99.5339		72.7307	0.150129	11.6091	1.52263	0.077472	0.0513949	0.477127	0.0368445	3.36571	4.96536	0.119	0.135884	95.2413	0.0807442	95.1606	4.91384	100.074
Allways Welcome Inn, OR	CPB-09-04	34.139	0.08	6.164	1.068	0.017	0.039	0.348	0.077	2.326	4.256	0.102	0.0617934	50.972	99.6498		73.0301	0.133448	11.6469	1.52692	0.0219504	0.0646581	0.486922	0.0859705	3.13522	5.12678	0.102	0.0617934	95.4227	0.0568805	95.3658	4.81328	100.179
Allways Welcome Inn, OR	CPB-09-04	34.083	0.101	6.214	1.07	0.036	0.039	0.351	0.053	2.421	4.341	0.099	0.146733	51.015	99.9697		72.9104	0.168478	11.7414	1.52978	0.0464832	0.0646581	0.491119	0.0591745	3.26327	5.22917	0.099	0.146733	95.7496	0.0747695	95.6748	4.8256	100.5
Allways Welcome Inn, OR	CPB-09-04	34.106	0.127	6.079	1.071	0.032	0.047	0.34	0.042	2.415	4.317	0.074	0.0357029	51.381	100.067		72.9596	0.211849	11.4863	1.53121	0.0413184	0.0779213	0.475728	0.046893	3.25518	5.20026	0.074	0.0357029	95.3959	0.0392082	95.3567	5.29259	100.649
Allways Welcome Inn, OR	CPB-09-04	33.967	0.093	6.256	1.075	0.023	0.037	0.343	0.054	2.383	4.197	0.09	0.146582	50.966	99.6306		72.6622	0.155133	11.8207	1.53693	0.0296976	0.0613423	0.479926	0.060291	3.21205	5.05571	0.09	0.146582	95.3106	0.070946	95.2396	4.93365	100.173
Allways Welcome Inn, OR	CPB-09-04	33.843	0.085	6.246	1.077	0.023	0.025	0.366	0.063	2.391	4.187	0.089	0.114522	51.255	99.7645		72.3969	0.141789	11.8018	1.53979	0.0296976	0.0414475	0.512107	0.0703395	3.22283	5.04366	0.089	0.114522	95.0039	0.063296	94.9406	5.4207	100.361
Allways Welcome Inn, OR	CPB-09-04	34.038	0.111	6.198	1.088	0.006	0.04	0.368	0.052	2.374	4.298	0.106	0.10219	51.263	100.044		72.8141	0.185159	11.7111	1.55551	0.0077472	0.066316	0.514906	0.058058	3.19991	5.17737	0.106	0.10219	95.4984	0.0676734	95.4307	5.18397	100.615
Allways Welcome Inn, OR	CPB-09-04	34.115	0.099	6.175	1.09	0.031	0.045	0.329	0.041	2.396	4.203	0.105	0.11013	50.974	99.7131		72.9788	0.165142	11.6677	1.55837	0.0400272	0.0746055	0.460337	0.0457765	3.22957	5.06293	0.105	0.11013	95.4984	0.0690425	95.4293	4.81309	100.242
Allways Welcome Inn, OR	CPB-09-04	34.15	0.119	6.176	1.1	0.026	0.029	0.347	0.045	2.408	4.401	0.092	0.0768284	50.968	99.9378		73.0537	0.198504	11.6696	1.57267	0.0335712	0.0480791	0.485522	0.0502425	3.24574	5.30144	0.092	0.0768284	95.8278	0.05606	95.7718	4.6806	100.452
Allways Welcome Inn, OR	CPB-09-04	33.918	0.131	6.182	1.112	0.02	0.048	0.362	0.051	2.445	4.242	0.092	0.101467	51.164	99.8685		72.5574	0.218521	11.6809	1.58983	0.025824	0.0795792	0.50651	0.0569415	3.29562	5.10991	0.092	0.101467	95.3145	0.0616154	95.2529	5.18639	100.439
Allways Welcome Inn, OR	CPB-09-04	34.147	0.114	6.149	1.114	0.058	0.039	0.354	0.066	2.346	4.381	0.078	0.0554062	51.006	99.9074		73.0473	0.190163	11.6185	1.59269	0.0748896	0.0646581	0.495317	0.073689	3.16217	5.27735	0.078	0.0554062	95.7301	0.0453351	95.6848	4.74422	100.429
Allways Welcome Inn, OR	CPB-09-04	34.091	0.105	6.249	1.117	0.016	0.044	0.381	0.035	2.456	4.285	0.097	0.142316	51.049	100.067		72.9275	0.17515	11.8075	1.59697	0.0206592	0.0729476	0.533095	0.0390775	3.31044	5.16171	0.097	0.142316	95.8843	0.0729313	95.8114	4.78171	100.593
Allways Welcome Inn, OR	CPB-09-04	33.886	0.143	6.277	1.139	0.023	0.033	0.339	0.067	2.339	4.211	0.106	0.116652	51.273	99.9527		72.4889	0.238538	11.8604	1.62843	0.0296976	0.0547107	0.474329	0.0748055	3.15274	5.07257	0.106	0.116652	95.2978	0.0709342	95.2269	5.31034	100.537
Allways Welcome Inn, OR	CPB-09-04	34.014	0.092	6.214	1.141	0.024	0.037	0.357	0.045	2.281	4.278	0.088	0.051592	51.232	99.8546		72.7627	0.153465	11.7414	1.63129	0.0309888	0.0613423	0.499514	0.0502425	3.07456	5.15328	0.088	0.051592	95.2984	0.0486856	95.2497	5.17433	100.424
Allways Welcome Inn, OR	CPB-09-04	34.076	0.122	6.228	1.145	0.025	0.046	0.352	0.011	2.438	4.342	0.1	0.0804714	51.208	100.173		72.8954	0.203508	11.7678	1.63701	0.03228	0.0762634	0.492518	0.0122815	3.28618	5.23037	0.1	0.0804714	95.8141	0.0602499	95.7538	4.96592	100.72
Allways Welcome Inn, OR	CPB-09-04	33.944	0.115	6.216	1.148	0.053	0.05	0.339	0.025	2.525	4.42	0.109	0.0773809	51.195	100.216		72.613	0.191831	11.7451	1.6413	0.0684336	0.082895	0.474329	0.0279125	3.40345	5.32433	0.109	0.0773809	95.759	0.0633425	95.6957	5.07964	100.775
Allways Welcome Inn, OR	CPB-09-04	33.887	0.08	6.302	1.155	0.028	0.047	0.36	0.047	2.347	4.235	0.094	0.0561698	50.939	99.5772		72.4911	0.133448	11.9076	1.6513	0.0361536	0.0779213	0.503712	0.0524755	3.16352	5.10148	0.094	0.0561698	95.2689	0.0522441	95.2166	4.89942	100.116
Allways Welcome Inn, OR	CPB-09-04	33.805	0.109	6.206	1.167	0.019	0.049	0.341	0.073	2.492	4.151	0.094	0.142808	51.121	99.7698		72.3157	0.181823	11.7262	1.66846	0.0245328	0.0812371	0.477127	0.0815045	3.35897	5.00029	0.094	0.142808	95.1526	0.0717792	95.0809	5.2689	100.35
Allways Welcome Inn, OR	CPB-09-04	33.642	0.115	6.266	1.478	0.027	0.028	0.369	0.068	2.69	4.157	0.081	0.0634294	50.904	99.8884		71.967	0.191831	11.8396	2.1131	0.0348624	0.0464212	0.516305	0.075922	3.62585	5.00752	0.081	0.0634294	95.5628	0.0484073	95.5144	4.91462	100.429
Allways Welcome Inn, OR	CPB-09-04	33.507	0.163	6.28	1.577	0.058	0.04	0.391	0.047	2.506	4.119	0.096	0.037444	51.286	100.107		71.6782	0.2719	11.8661	2.25464	0.0748896	0.066316	0.547087	0.0524755	3.37784	4.96175	0.096	0.037444	95.2846	0.0488639	95.2357	5.47457	100.71
Kilgore fallout ash, ID	srp09-09	34.244	0.087	6.125	1.071	0.026	0.028	0.348	0.093	2.425	4.516	0	0.091	49.415	98.469		73.2548	0.145125	11.5732	1.53121	0.0335712	0.0464212	0.486922	0.103835	3.26866	5.43997	0	0.091	95.9747	0.0205186	95.9541	2.82297	98.7771
Kilgore fallout ash, ID	srp09-09	34.637	0.093	6.162	1.036	0.028	0.028	0.329	0.026	2.397	4.482	0	0.076	49.243	98.537		74.0955	0.155133	11.6431	1.48117	0.0361536	0.0464212	0.460337	0.029029	3.23092	5.39902	0	0.076	96.6527	0.0171364	96.6356	2.13278	98.7684
Kilgore fallout ash, ID	srp09-09	34.419	0.091	6.153	1.113	0.023	0.028	0.339	0.058	2.361	4.544	0	0.094	49.617	98.84		73.6291	0.151797	11.6261	1.59126	0.0296976	0.0464212	0.474329	0.064757	3.18239	5.4737	0	0.094	96.3636	0.021195	96.3424	2.80356	99.1459
Kilgore fallout ash, ID	srp09-09	34.292	0.088	6.288	1.104	0.028	0.051	0.365	0.065	2.521	4.492	0	0.105	49.517	98.916		73.3574	0.146793	11.8812	1.57839	0.0361536	0.0845529	0.510708	0.0725725	3.39806	5.41106	0	0.105	96.5819	0.0236753	96.5582	2.64623	99.2045
Kilgore fallout ash, ID	srp09-09	34.465	0.107	6.145	1.019	0.017	0.037	0.343	0.046	2.524	4.481	0	0.093	49.957	99.234		73.7275	0.178487	11.611	1.45686	0.0219504	0.0613423	0.479926	0.051359	3.4021	5.39781	0	0.093	96.4813	0.0209696	96.4604	3.11407	99.5744
Kilgore fallout ash, ID	srp09-09	34.214	0.09	6.098	1.08	0.011	0.041	0.329	0.051	2.468	4.361	0.019572	0.101	49.651	98.5146		73.1906	0.150129	11.5222	1.54408	0.0142032	0.0679739	0.460337	0.0569415	3.32662	5.25326	0.019572	0.101	95.7069	0.0310142	95.6759	3.18734	98.8632
Kilgore fallout ash, ID	srp09-09	34.466	0.125	6.127	1.085	0.019	0.027	0.325	0	2.386	4.368	0	0.097	49.673	98.698		73.7297	0.208512	11.577	1.55122	0.0245328	0.0447633	0.45474	0	3.21609	5.26169	0	0.097	96.1652	0.0218715	96.1433	2.86778	99.0111
Kilgore fallout ash, ID	srp09-09	34.405	0.112	6.167	1.012	0.001	0.06	0.342	0.047	2.503	4.427	0	0.12	49.696	98.892		73.5992	0.186827	11.6525	1.44686	0.0012912	0.099474	0.478526	0.0524755	3.37379	5.33276	0	0.12	96.3437	0.0270575	96.3167	2.89099	99.2077
Kilgore fallout ash, ID	srp09-09	34.432	0.071	6.195	1.163	0.016	0.036	0.386	0.069	2.362	4.527	0	0.092	49.623	98.972		73.6569	0.118435	11.7055	1.66274	0.0206592	0.0596844	0.540091	0.0770385	3.18374	5.45322	0	0.092	96.57	0.0207441	96.5493	2.71931	99.2686
Kilgore fallout ash, ID	srp09-09	34.634	0.113	6.219	1.005	0.021	0.046	0.336	0.047	2.447	4.537	0	0.108	49.533	99.046		74.0891	0.188495	11.7508	1.43685	0.0271152	0.0762634	0.470131	0.0524755	3.29831	5.46527	0	0.108	96.9628	0.0243517	96.9384	2.36474	99.3032
Kilgore fallout ash, ID	srp09-09	34.573	0.106	6.222	1.136	0.012	0.035	0.349	0.058	2.588	4.408	0	0.099	49.575	99.161		73.9586	0.176819	11.7565	1.62414	0.0154944	0.0580265	0.488321	0.064757	3.48837	5.30988	0	0.099	97.0398	0.0223224	97.0175	2.40514	99.4226
Kilgore fallout ash, ID	srp09-09	34.418	0.094	6.057	1.071	0.03	0.046	0.367	0.06	2.551	4.47	0	0.089	49.754	99.007		73.627	0.156801	11.4447	1.53121	0.038736	0.0762634	0.513506	0.06699	3.43849	5.38456	0	0.089	96.3672	0.0200676	96.3472	2.98605	99.3332
Kilgore fallout ash, ID	srp09-09	34.321	0.104	6.157	1.107	0.01	0.04	0.364	0.068	2.362	4.658	0	0.105	49.615	98.911		73.4195	0.173482	11.6337	1.58268	0.012912	0.066316	0.509309	0.075922	3.18374	5.61103	0	0.105	96.3735	0.0236753	96.3498	2.87503	99.2249
Kilgore fallout ash, ID	srp09-09	32.442	0.294	6.603	2.711	0.101	0.086	0.778	0.228	2.677	4.271	0	0.066	48.772	99.029		69.3999	0.490421	12.4764	3.87592	0.130411	0.142579	1.08858	0.254562	3.60833	5.14485	0	0.066	96.6779	0.0148816	96.6631	2.65554	99.3186
Kilgore fallout ash, ID	srp09-09	34.66	0.093	6.212	1.138	0.037	0.046	0.343	0.032	2.782	4.353	0	0.079	49.492	99.267		74.1447	0.155133	11.7376	1.627	0.0477744	0.0762634	0.479926	0.035728	3.74986	5.24362	0	0.079	97.3766	0.0178129	97.3587	2.14051	99.4992
Kilgore fallout ash, ID	srp09-09	34.712	0.121	6.157	1.032	0.026	0.038	0.316	0	2.564	4.385	0	0.079	49.74	99.17		74.2559	0.20184	11.6337	1.47545	0.0335712	0.0630002	0.442147	0	3.45602	5.28217	0	0.079	96.9228	0.0178129	96.9049	2.54191	99.4469
Kilgore fallout ash, ID	srp09-09	34.486	0.088	6.211	1.184	0.01	0.038	0.365	0.073	2.539	4.489	0	0.093	49.435	99.011		73.7725	0.146793	11.7357	1.69276	0.012912	0.0630002	0.510708	0.0815045	3.42232	5.40745	0	0.093	96.9386	0.0209696	96.9176	2.34877	99.2664
Kilgore fallout ash, ID	srp09-09	34.535	0.14	6.164	1.038	0.004	0.03	0.361	0.054	2.378	4.572	0	0.093	49.902	99.271		73.8773	0.233534	11.6469	1.48403	0.0051648	0.049737	0.505111	0.060291	3.20531	5.50743	0	0.093	96.6678	0.0209696	96.6468	2.94596	99.5927
Kilgore fallout ash, ID	srp09-09	34.594	0.16	6.263	1.108	0.019	0.034	0.347	0.059	2.494	4.417	0	0.07	49.533	99.098		74.0035	0.266896	11.8339	1.58411	0.0245328	0.0563686	0.485522	0.0658735	3.36166	5.32072	0	0.07	97.0731	0.0157835	97.0573	2.28947	99.3468
Kilgore fallout ash, ID	srp09-09	34.367	0.118	6.163	1.124	0.015	0.044	0.358	0.036	2.393	4.375	0.0192916	0.098	49.687	98.7973		73.5179	0.196836	11.645	1.60698	0.019368	0.0729476	0.500914	0.040194	3.22552	5.27012	0.0192916	0.098	96.2131	0.0302197	96.1828	2.93502	99.1179
Kilgore fallout ash, ID	srp09-09	33.763	0.129	6.305	1.716	0.063	0.03	0.466	0.107	2.636	4.433	0	0.083	49.235	98.966		72.2258	0.215185	11.9133	2.45337	0.0813456	0.049737	0.652027	0.119466	3.55306	5.33999	0	0.083	96.6863	0.0187148	96.6676	2.5795	99.2471
Kilgore fallout ash, ID	srp09-09	34.669	0.132	6.149	1.074	0.03	0.04	0.352	0.054	2.349	4.467	0	0.107	49.334	98.757		74.1639	0.220189	11.6185	1.5355	0.038736	0.066316	0.492518	0.060291	3.16622	5.38095	0	0.107	96.8502	0.0241263	96.826	2.16602	98.9921
Kilgore fallout ash, ID	srp09-09	34.3522	0.116182	6.19736	1.18759	0.0248636	0.0404091	0.373091	0.0605	2.48668	4.45605	0.00176653	0.0926364	49.5454	98.9347		73.4862	0.193803	11.7099	1.6979	0.0321039	0.0669942	0.522029	0.0675483	3.3518	5.36775	0.00176653	0.0926364	96.5904	0.0216314	96.5688	2.65539	99.2242
